# Supplementary material for: Oxo-Carotenoids as Efficient Superoxide Radical Scavengers
Source: MDPI journal article supplement (doi:10.3390/antiox11081525), 2022-08-05

## Supplementary Materials-2 for

# Oxo-carotenoids as Efficient Superoxide Radical Scavengers

Gaosheng Shi,<sup>a</sup> Hyein Kim<sup>b</sup> and Sangho Koo<sup>a,b\*</sup>

<sup>a</sup> Department of Energy Science and Technology, <sup>b</sup> Department of Chemistry, Myongji University,

Myongji-Ro 116, Yongin, 17058, Gyeonggi-Do, Korea

### Table of Contents

|                                                                    |       |      |
|--------------------------------------------------------------------|-------|------|
| (1) <sup>1</sup> H- and <sup>13</sup> C-NMR Spectra                | ----- | S-2  |
| (2) Assignment of <i>E</i> -stereochemistry for <b>4</b> by N.O.E. | ----- | S-59 |
| (3) Peak assignment for <b>2b</b> by COSY, HMBC, and DEPT          | ----- | S-63 |

# (1) <sup>1</sup>H- and <sup>13</sup>C-NMR Spectra

SGS-1354-1

Sample Name **SGS-1354-1**  
Date collected **2021-05-13**

Pulse sequence **PROTON**  
Solvent **cdcl3**

Temperature **25**  
Spectrometer **Agilent-NMR.chem.com-vnmrs400**  
Study owner **vnmr1**  
Operator **vnmr1**

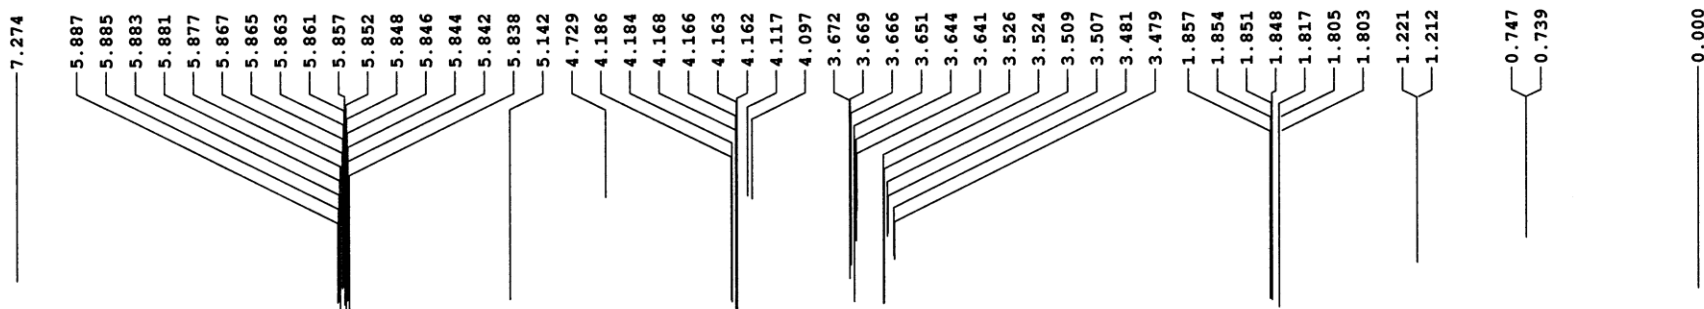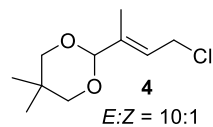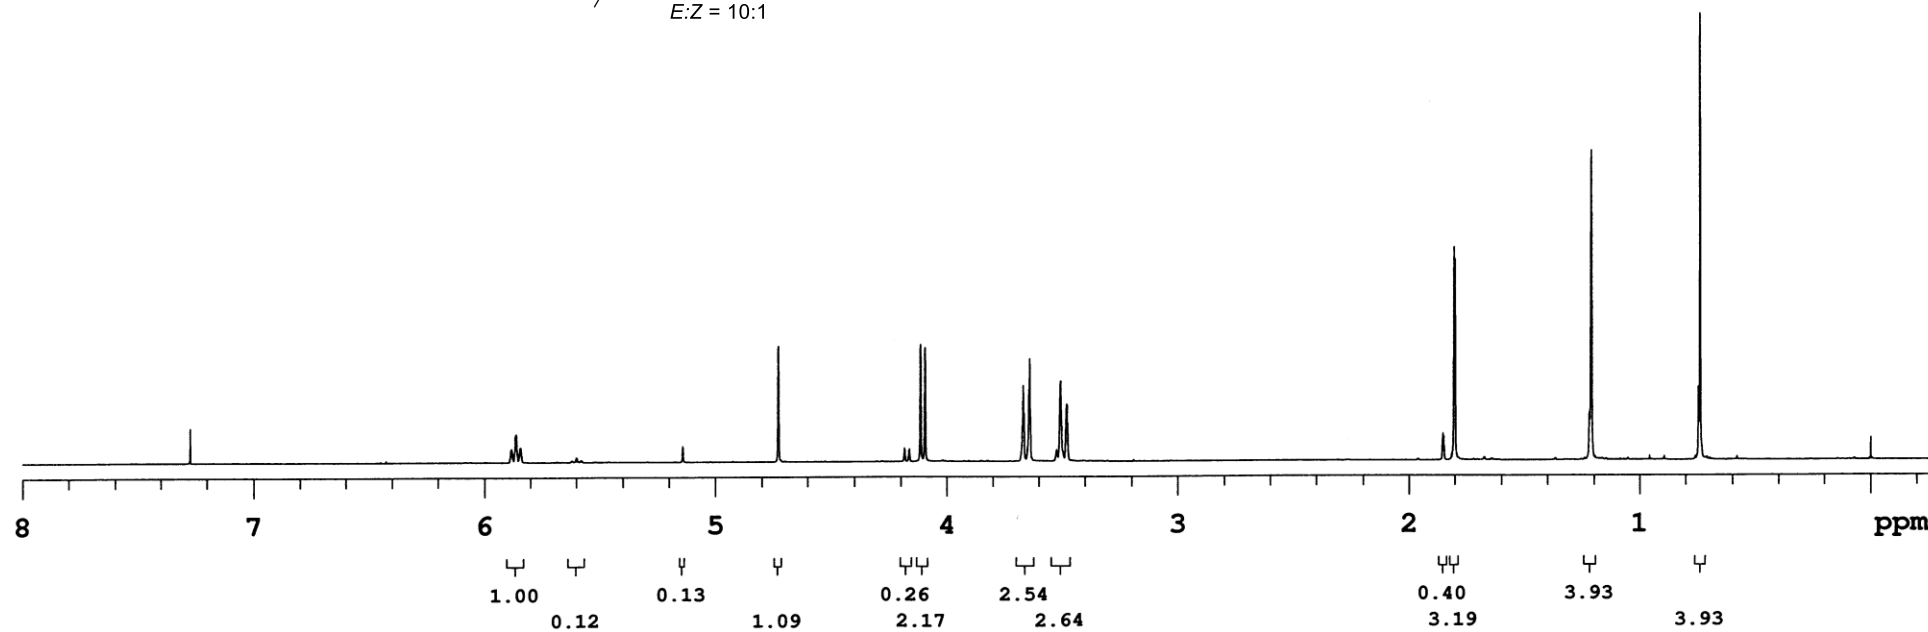

SGS-1354-1-13C

Sample Name **SGS-1354-1-13C**  
Date collected **2021-05-17**

Pulse sequence **CARBON**  
Solvent **cdcl3**

Temperature **25**  
Spectrometer **Agilent-NMR.chem.com-vnmrs400**

Study owner **vnmr1**  
Operator **vnmr1**

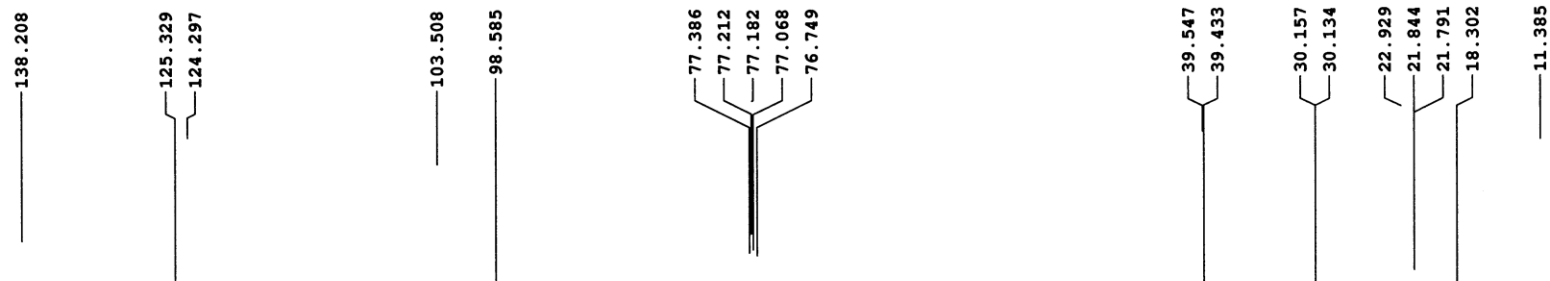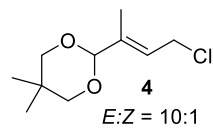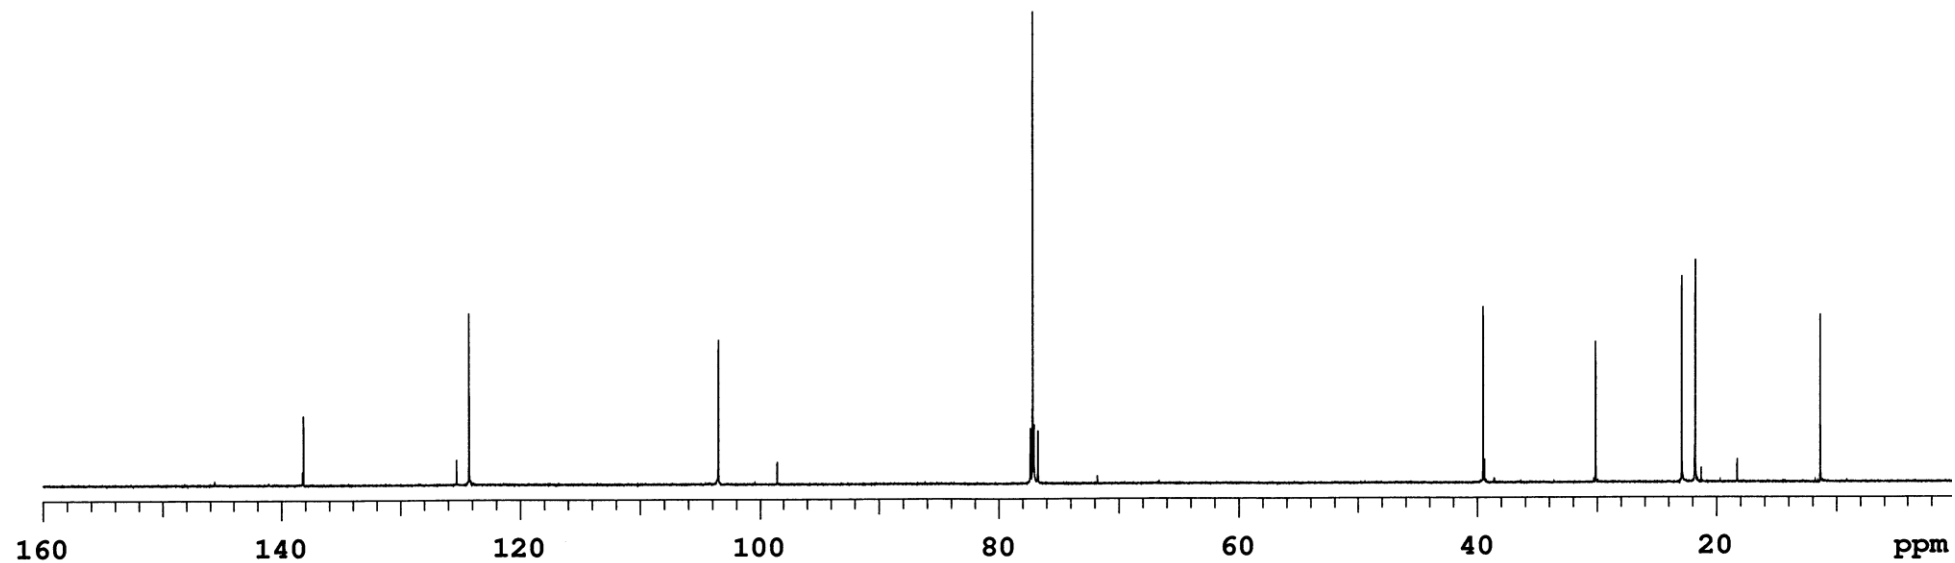

SGS-1540-11

Sample Name **SGS-1540-11**  
Date collected **2021-11-09**

Pulse sequence **PROTON**  
Solvent **cdcl3**

Temperature **25**  
Spectrometer **Agilent-NMR.chem.com-vnmrs4000**

Study owner **vnmr1**  
Operator **vnmr1**

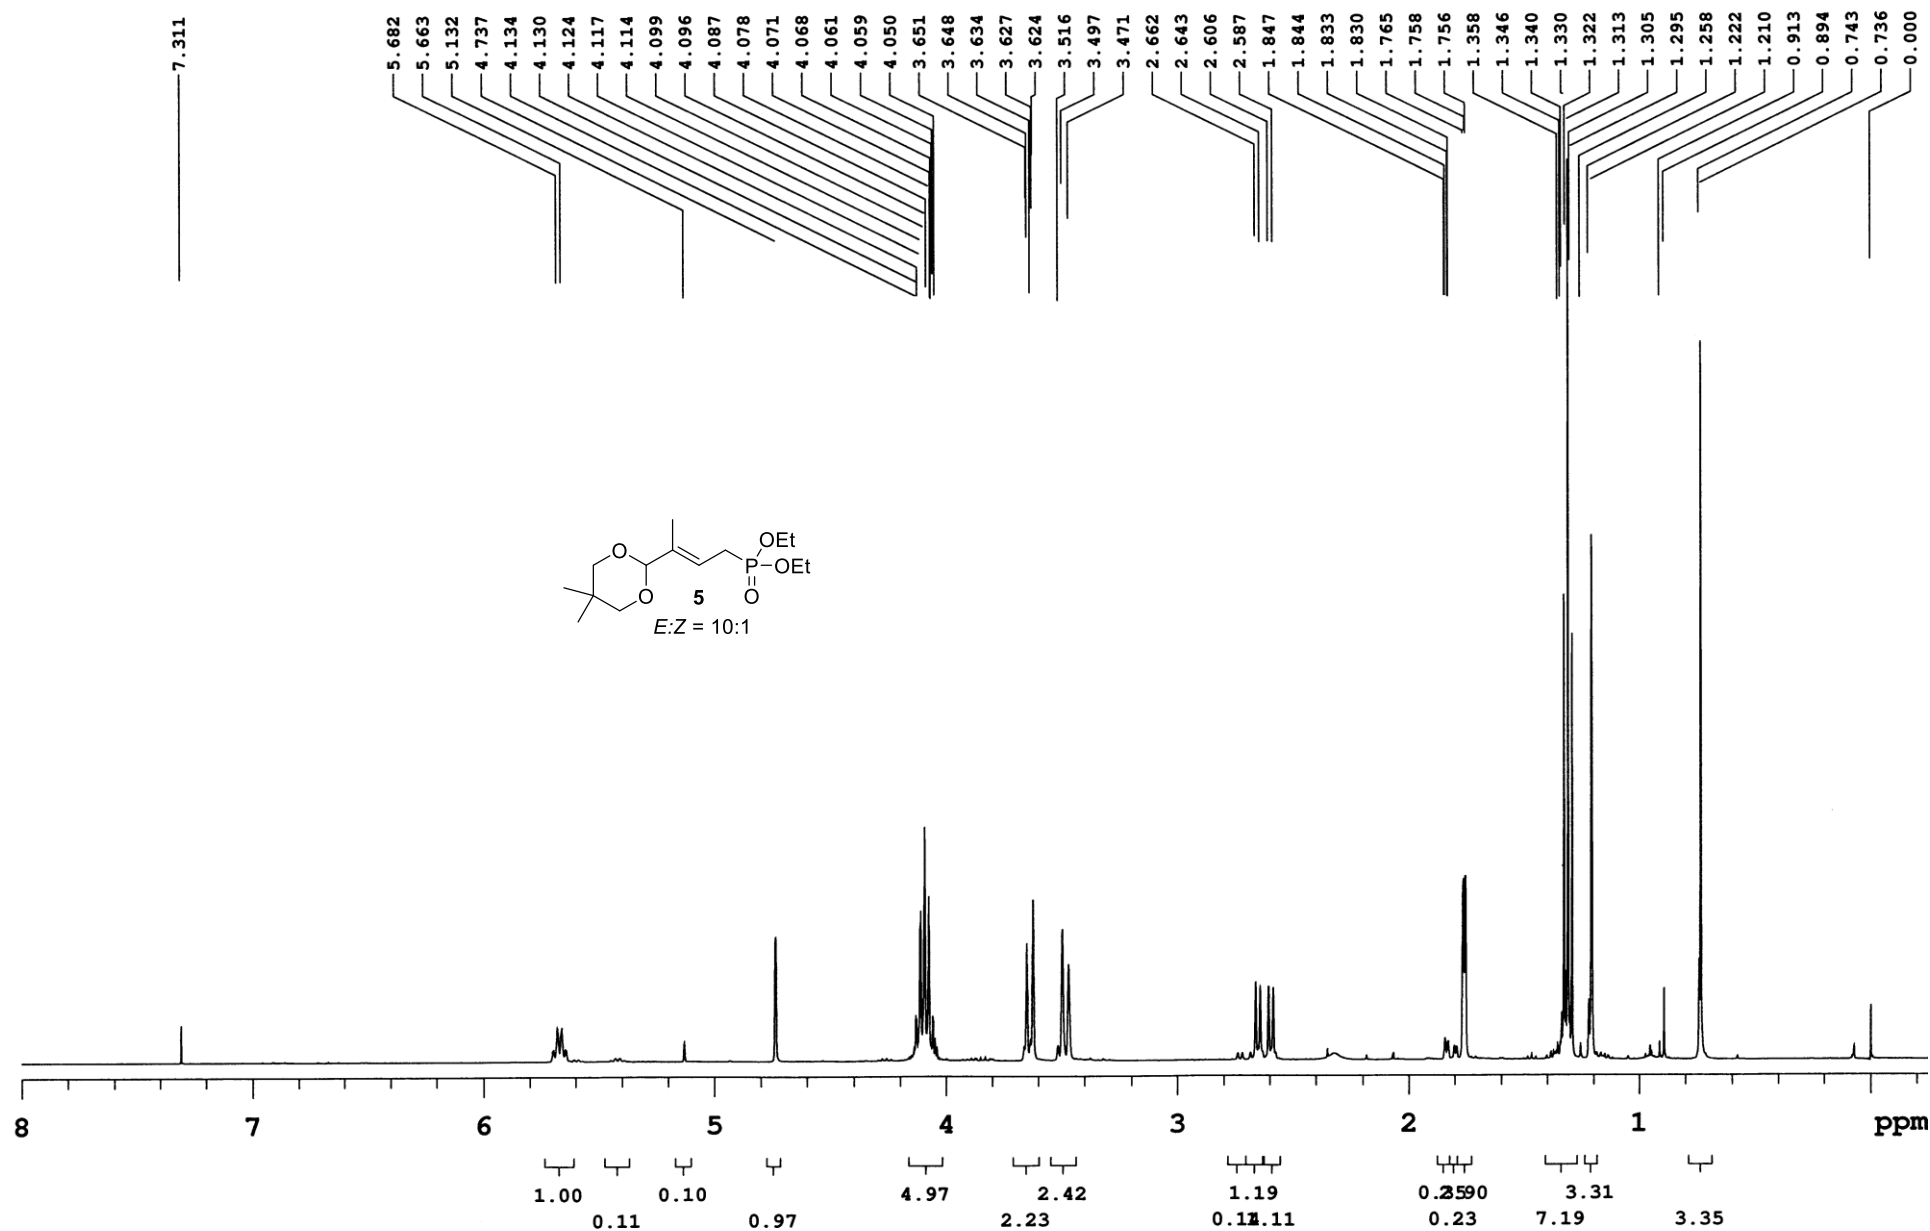



SGS-1540-11-13C

Sample Name **SGS-1540-11-13C**  
Date collected **2021-11-10**

Pulse sequence **CARBON**  
Solvent **cdcl3**

Temperature **25**  
Spectrometer **Agilent-NMR.chem.com-vnmrs400**

Study owner **vnmr1**  
Operator **vnmr1**

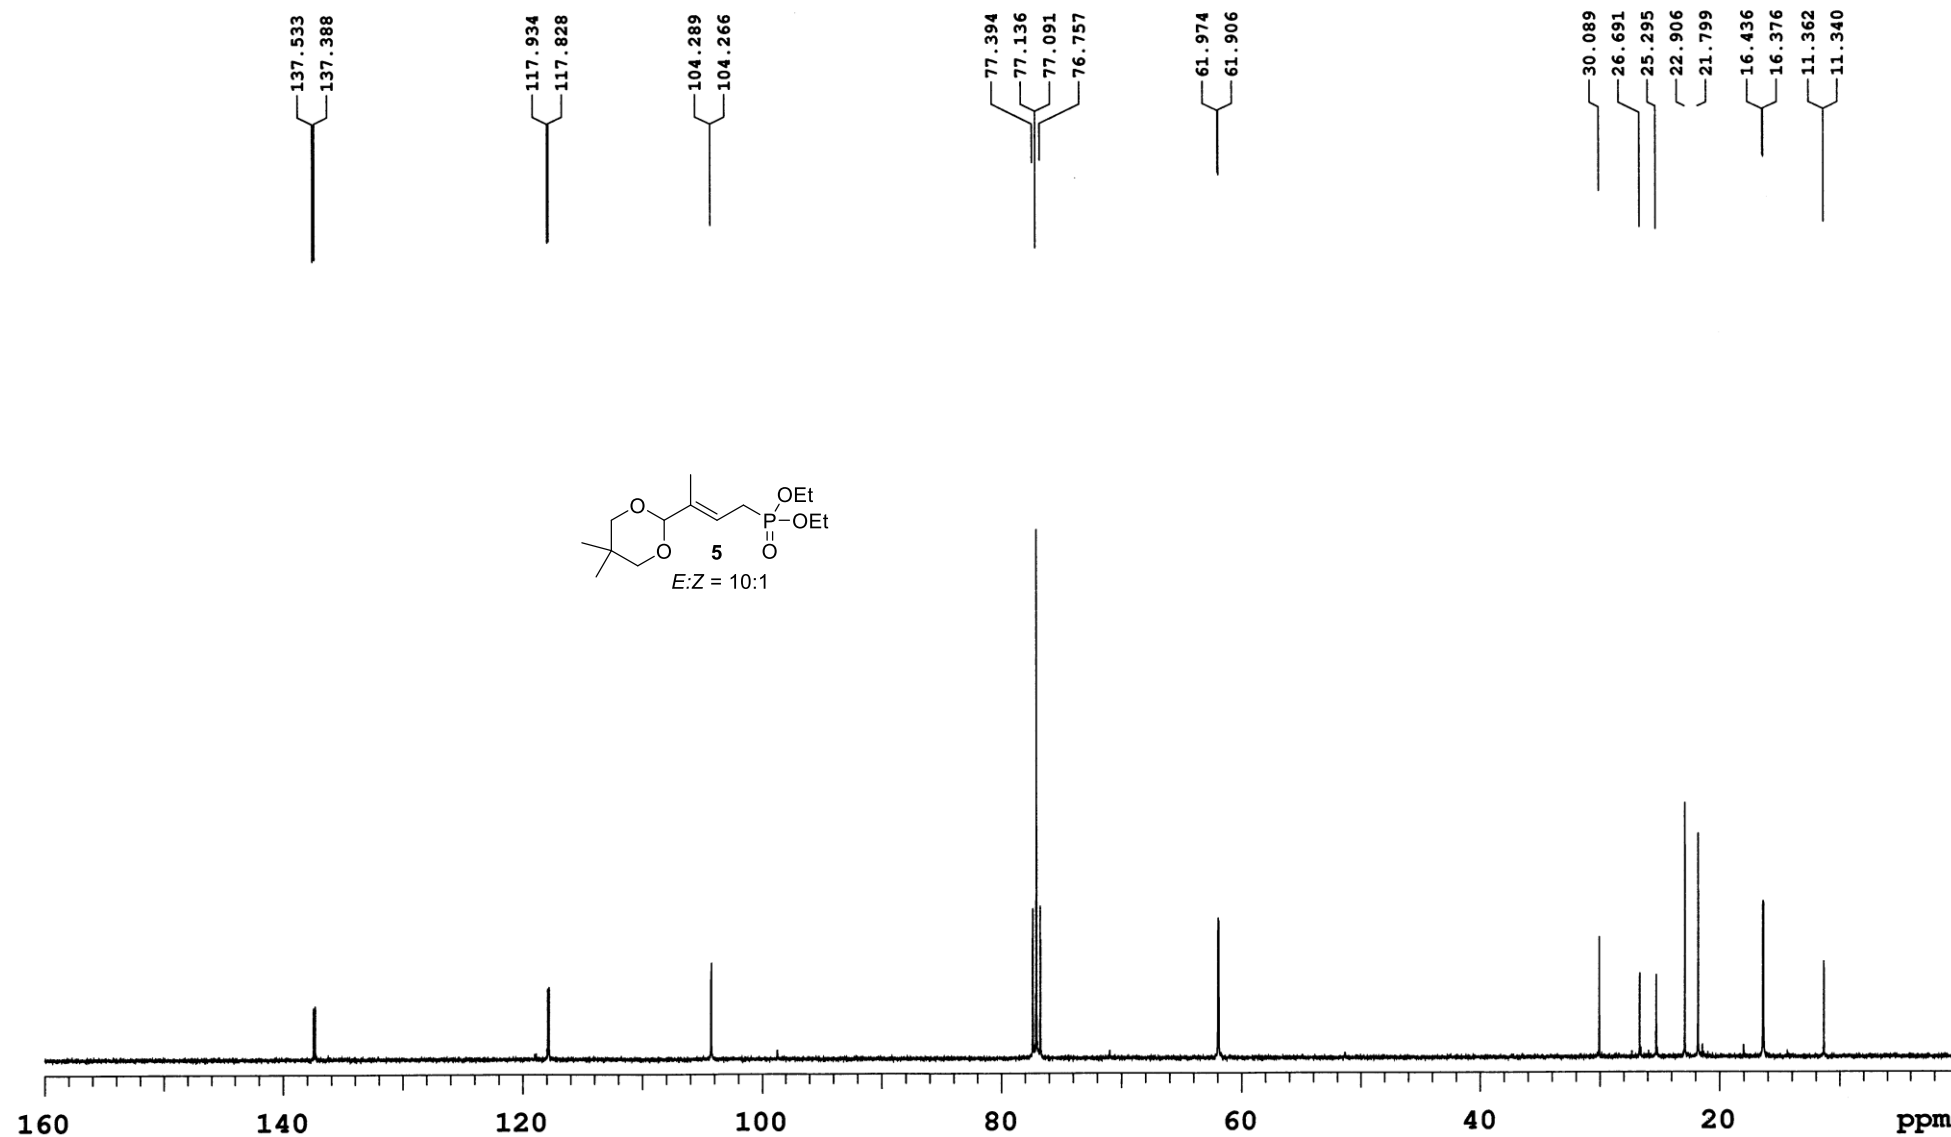

SGS-1621-2

Sample Name **SGS-1621-2**  
Date collected **2021-11-10**

Pulse sequence **PROTON**  
Solvent **cdcl3**

Temperature **25**  
Spectrometer **Agilent-NMR.chem.com-vnmrs400**

Study owner **vnmr1**  
Operator **vnmr1**

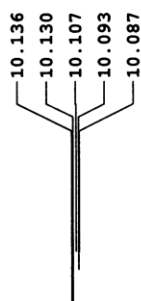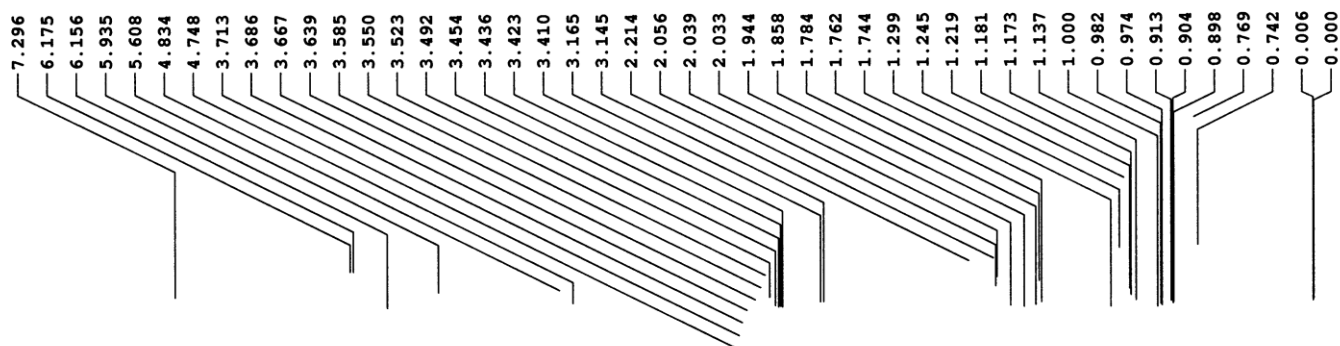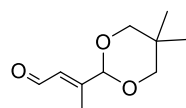

**6**

*E:Z* > 5:1

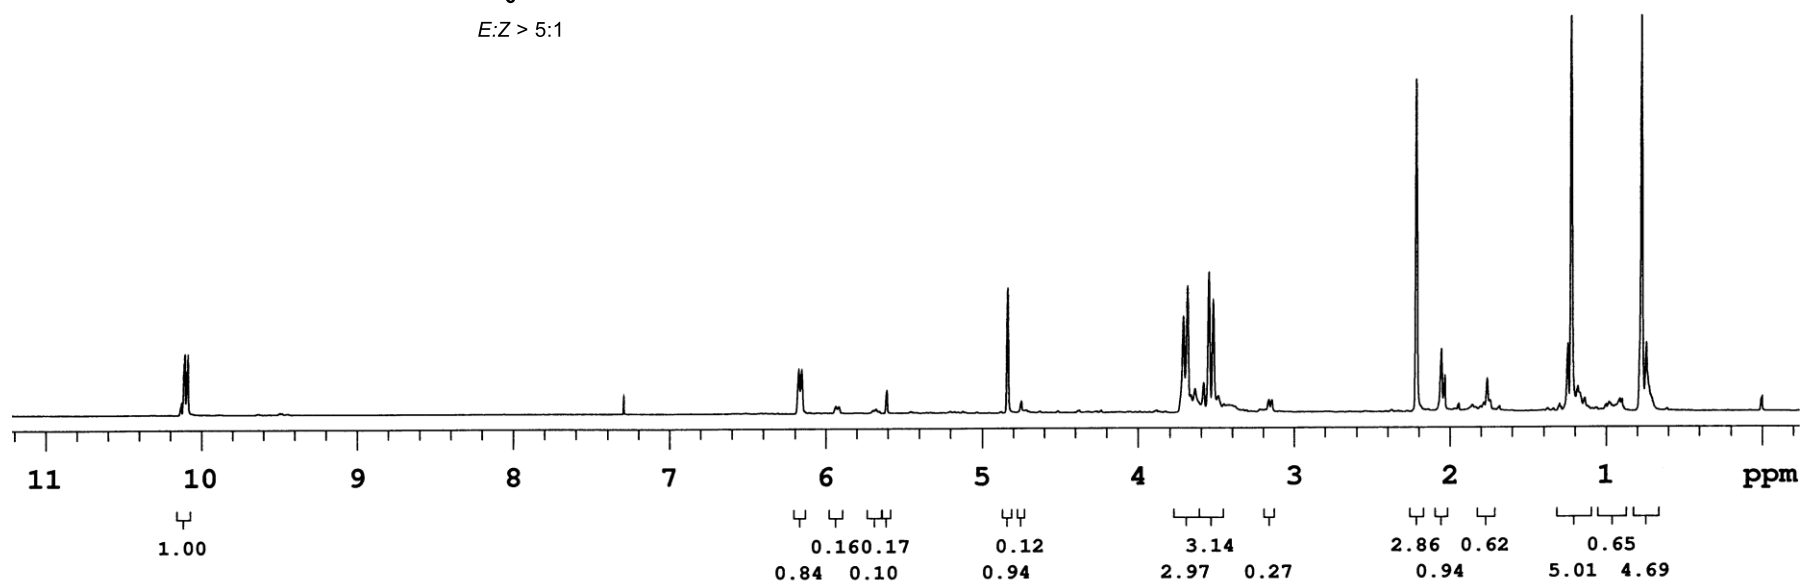

SGS-1621-2

Sample Name **SGS-1621-2**  
Date collected **2021-11-12**

Pulse sequence **CARBON**  
Solvent **cdcl3**

Temperature **25**  
Spectrometer **Agilent-NMR.chem.com-vnmrs400**  
Study owner **vnmr1**  
Operator **vnmr1**

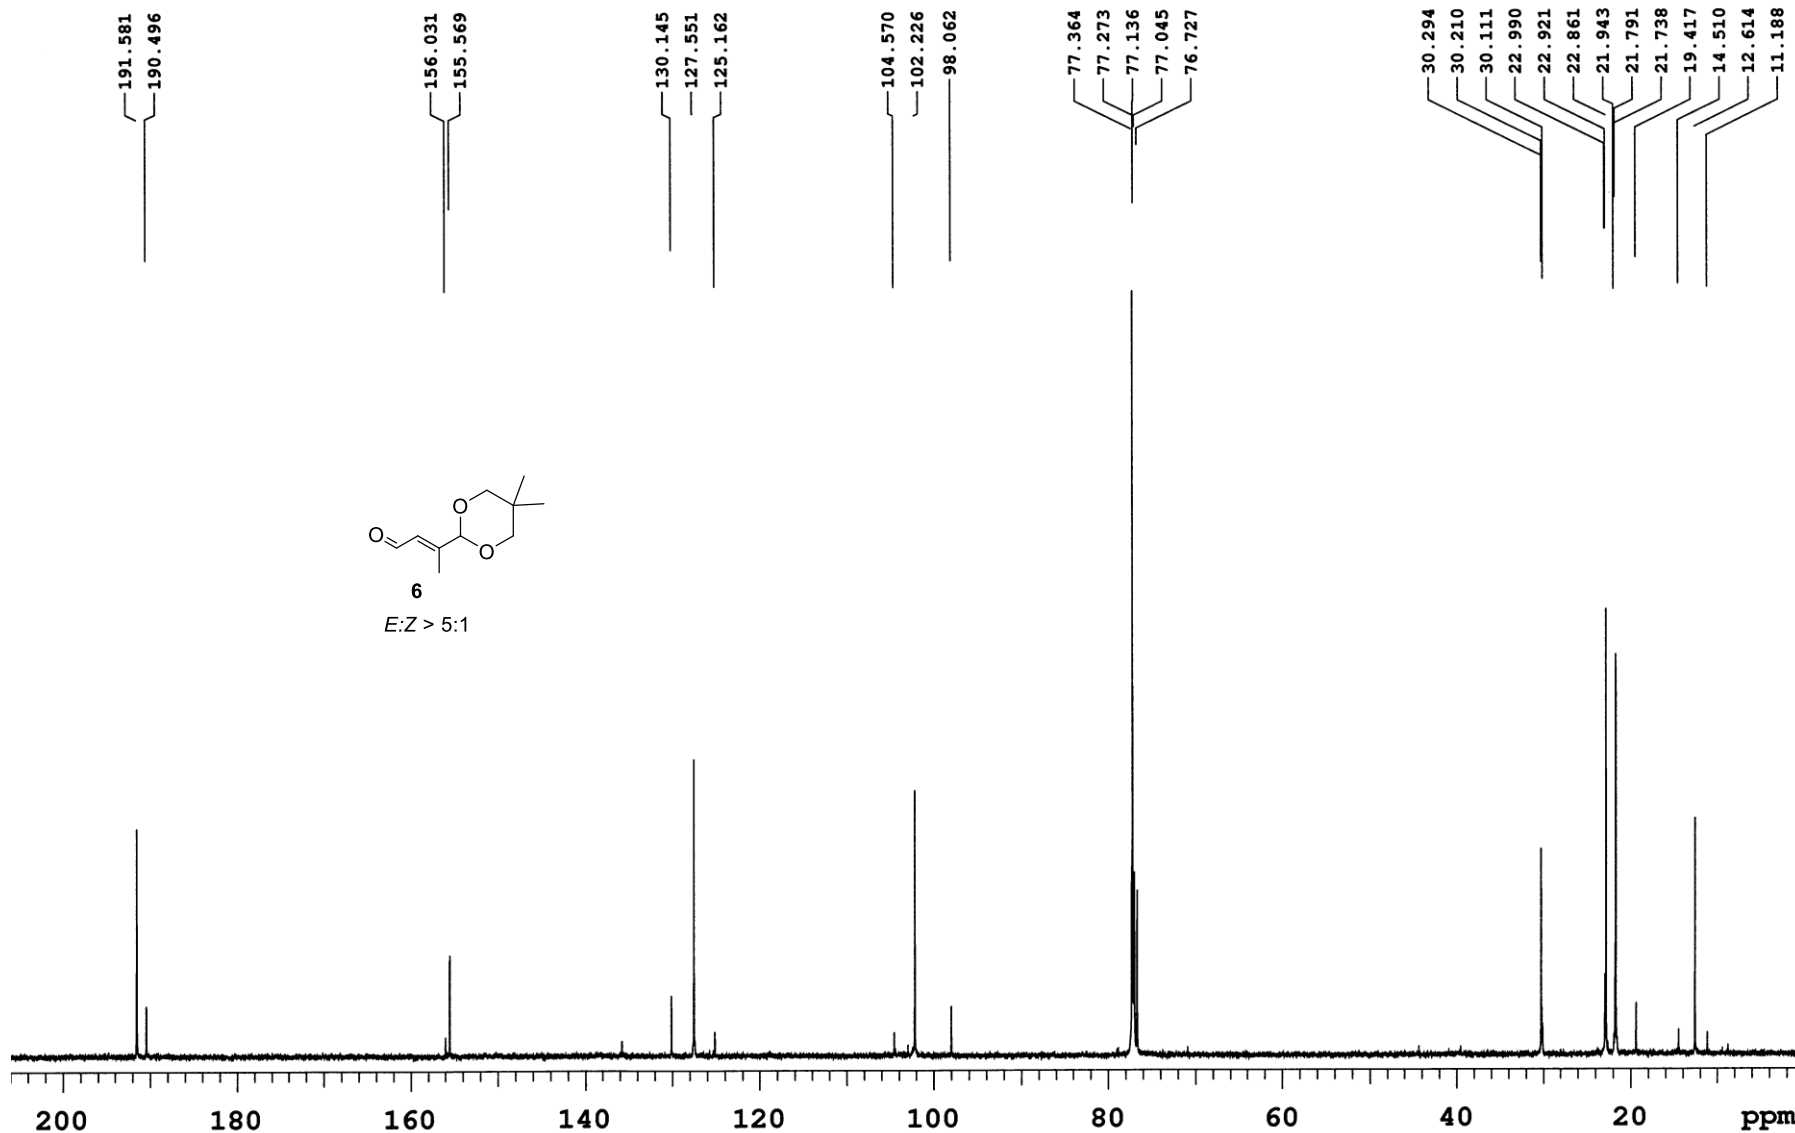

SGS-1541-21re

Sample Name **SGS-1541-21re**  
Date collected **2021-10-12**

Pulse sequence **PROTON**  
Solvent **cdcl3**

Temperature **25**  
Spectrometer **Agilent-NMR.chem.com-vnmr400**  
Study owner **vnmr1**  
Operator **vnmr1**

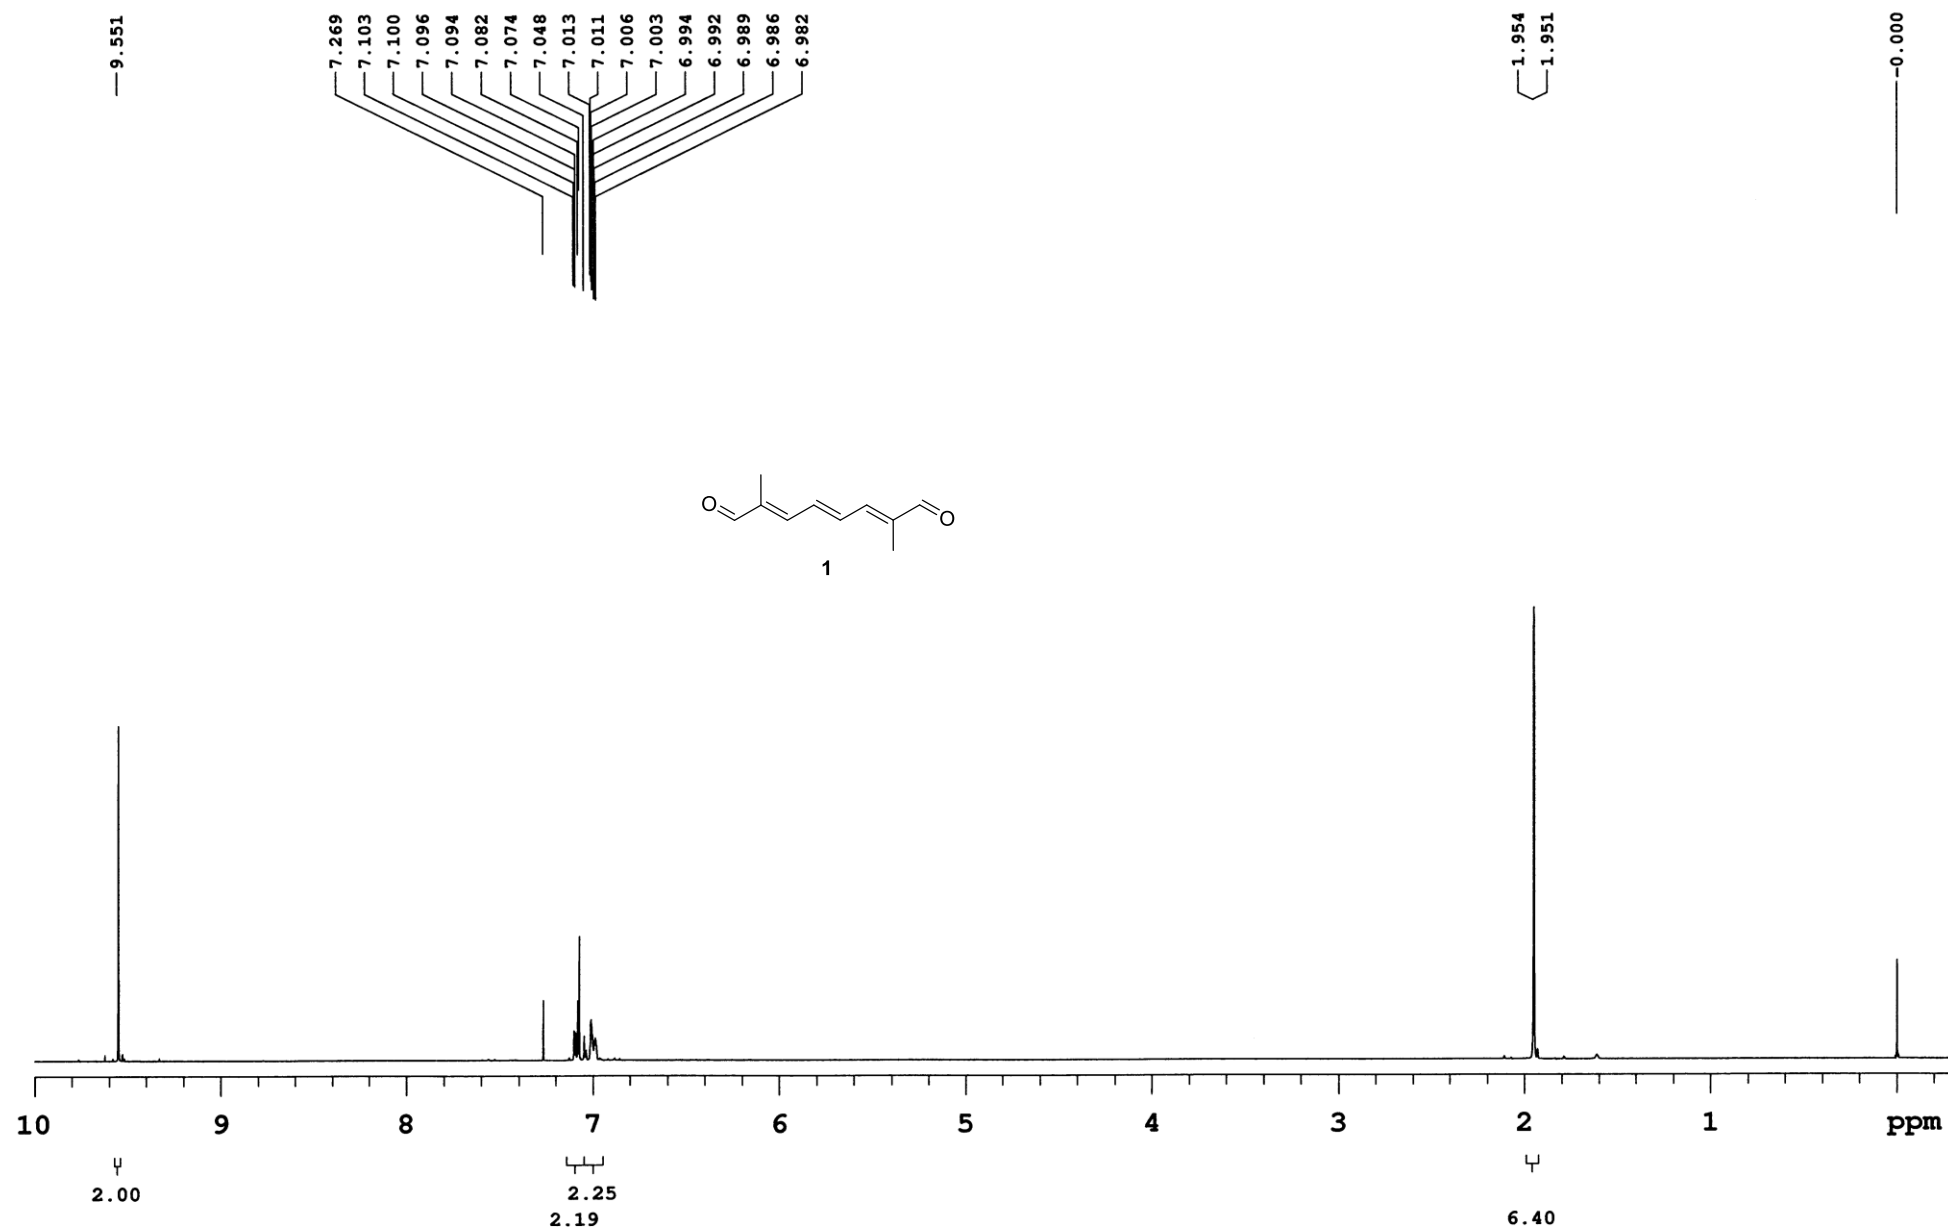

SGS-1541-21re

Sample Name **SGS-1541-21re**  
Date collected **2021-10-12**

Pulse sequence **PROTON**  
Solvent **cdcl3**

Temperature **25**  
Spectrometer **Agilent-NMR.chem.com-vnmrs400**  
Study owner **vnmr1**  
Operator **vnmr1**

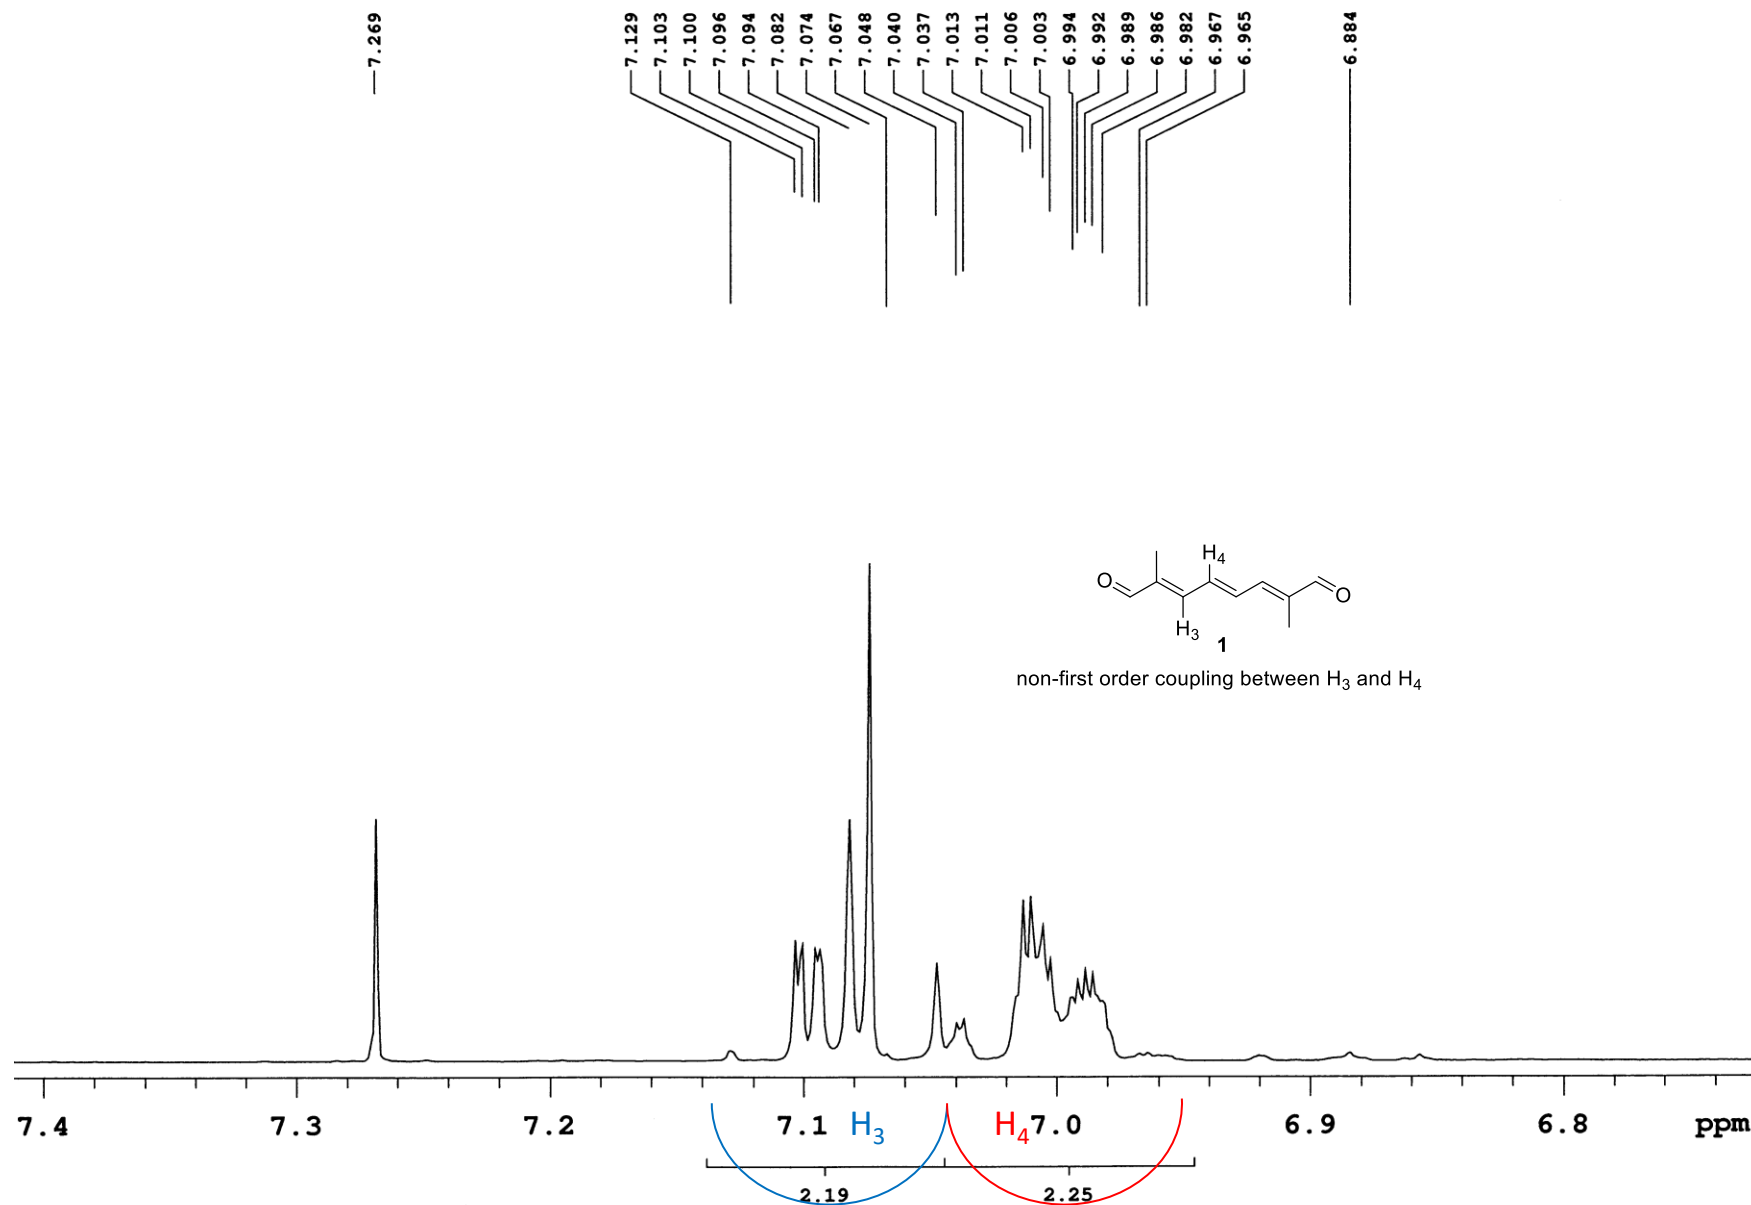

SGS-1412-C20

Sample Name **SGS-1412-C20**  
Date collected **2021-11-16**

Pulse sequence **PROTON**  
Solvent **cdcl3**

Temperature **25**  
Spectrometer **Agilent-NMR.chem.com-vnmrs400**

Study owner **vnmr1**  
Operator **vnmr1**

9.470

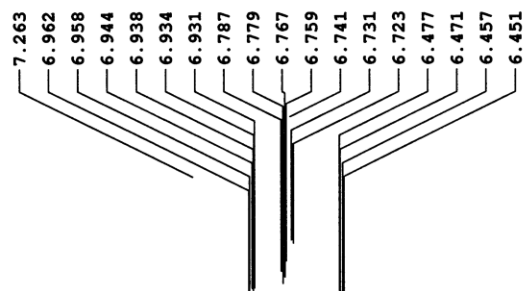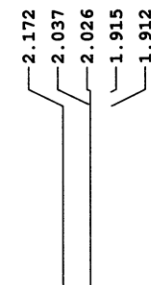

1.254

0.000

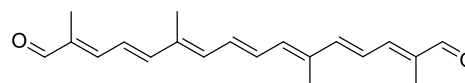

2

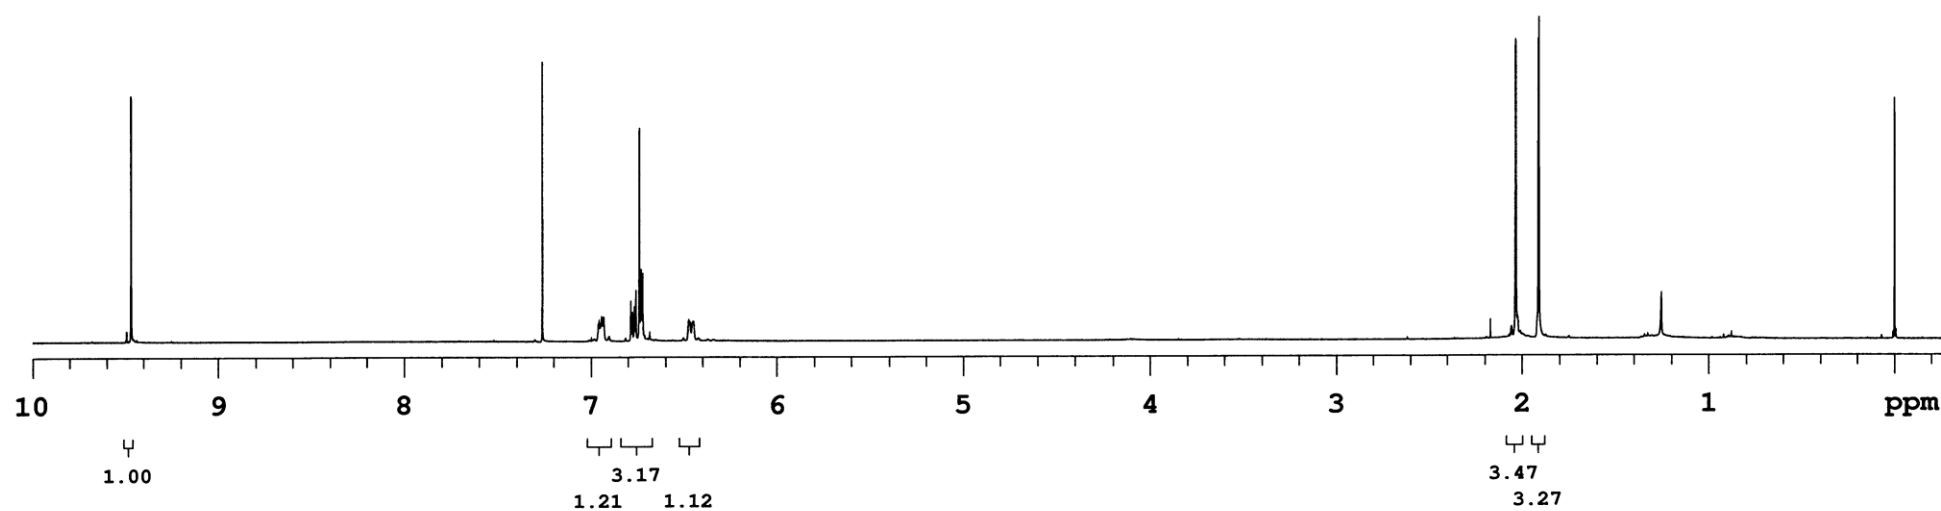

SGS-1412-C20

Sample Name **SGS-1412-C20**  
Date collected **2021-11-16**

Pulse sequence **PROTON**  
Solvent **cdcl3**

Temperature **25**  
Spectrometer **Agilent-NMR.chem.com-vnmr400**

Study owner **vnmr1**  
Operator **vnmr1**

— 7.263

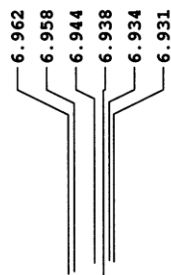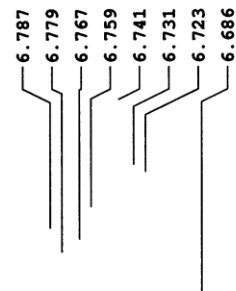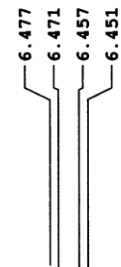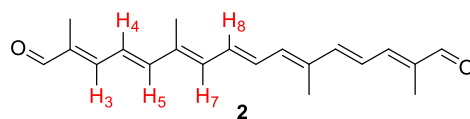

non-first order couplings

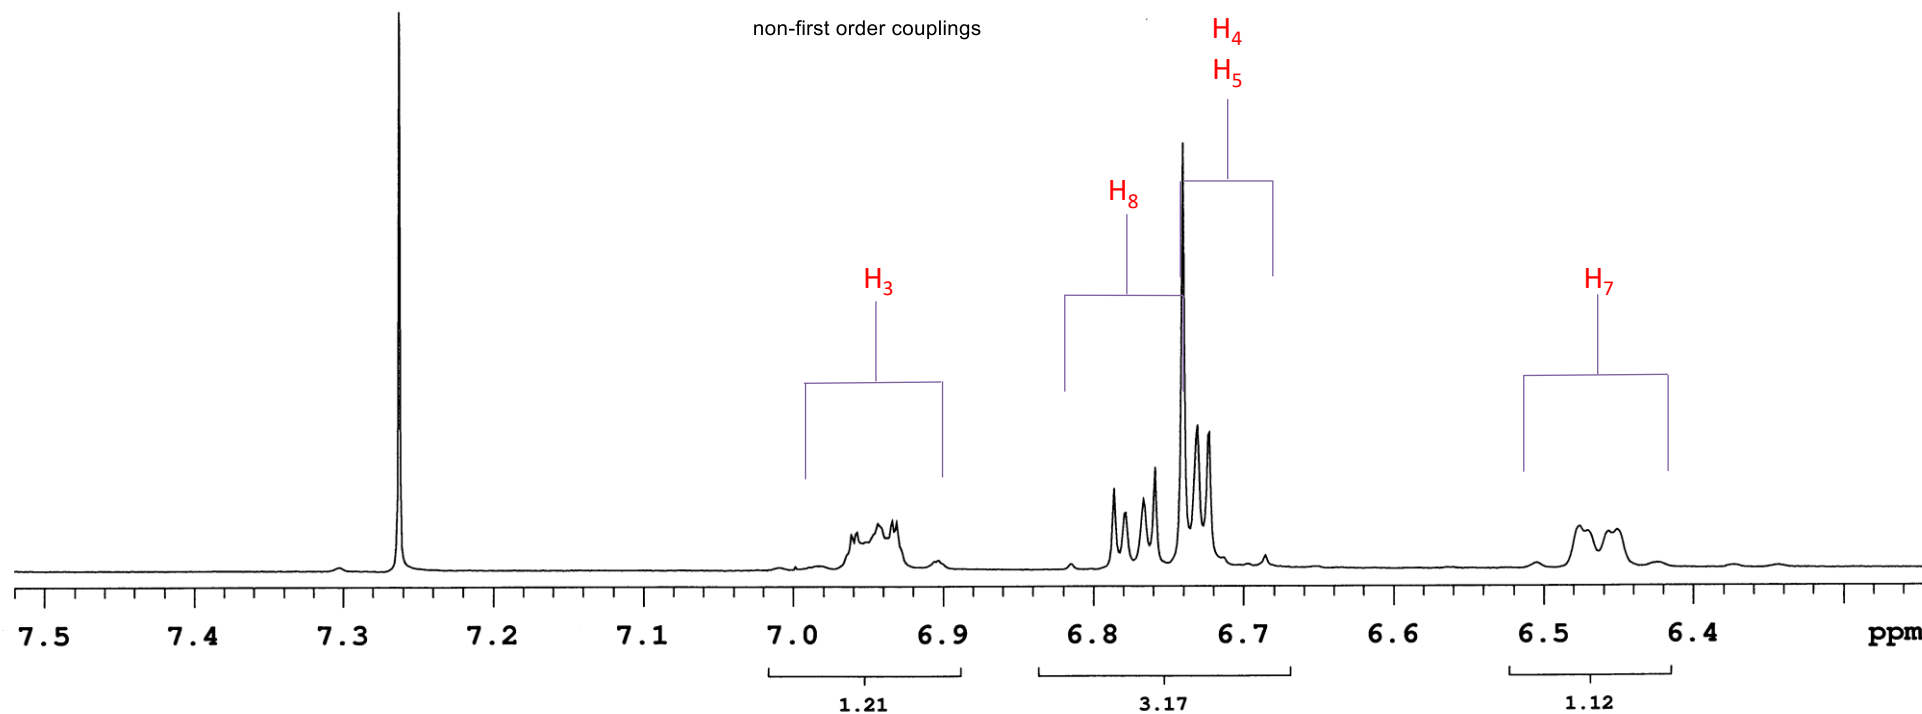

SGS-1412-C20-13C

Sample Name **SGS-1412-C20-13C**  
Date collected **2021-11-17**

Pulse sequence **CARBON**  
Solvent **cdcl3**

Temperature **25**  
Spectrometer **Agilent-NMR.chem.com-vnmrs400**  
Study owner **vnmr1**  
Operator **vnmr1**

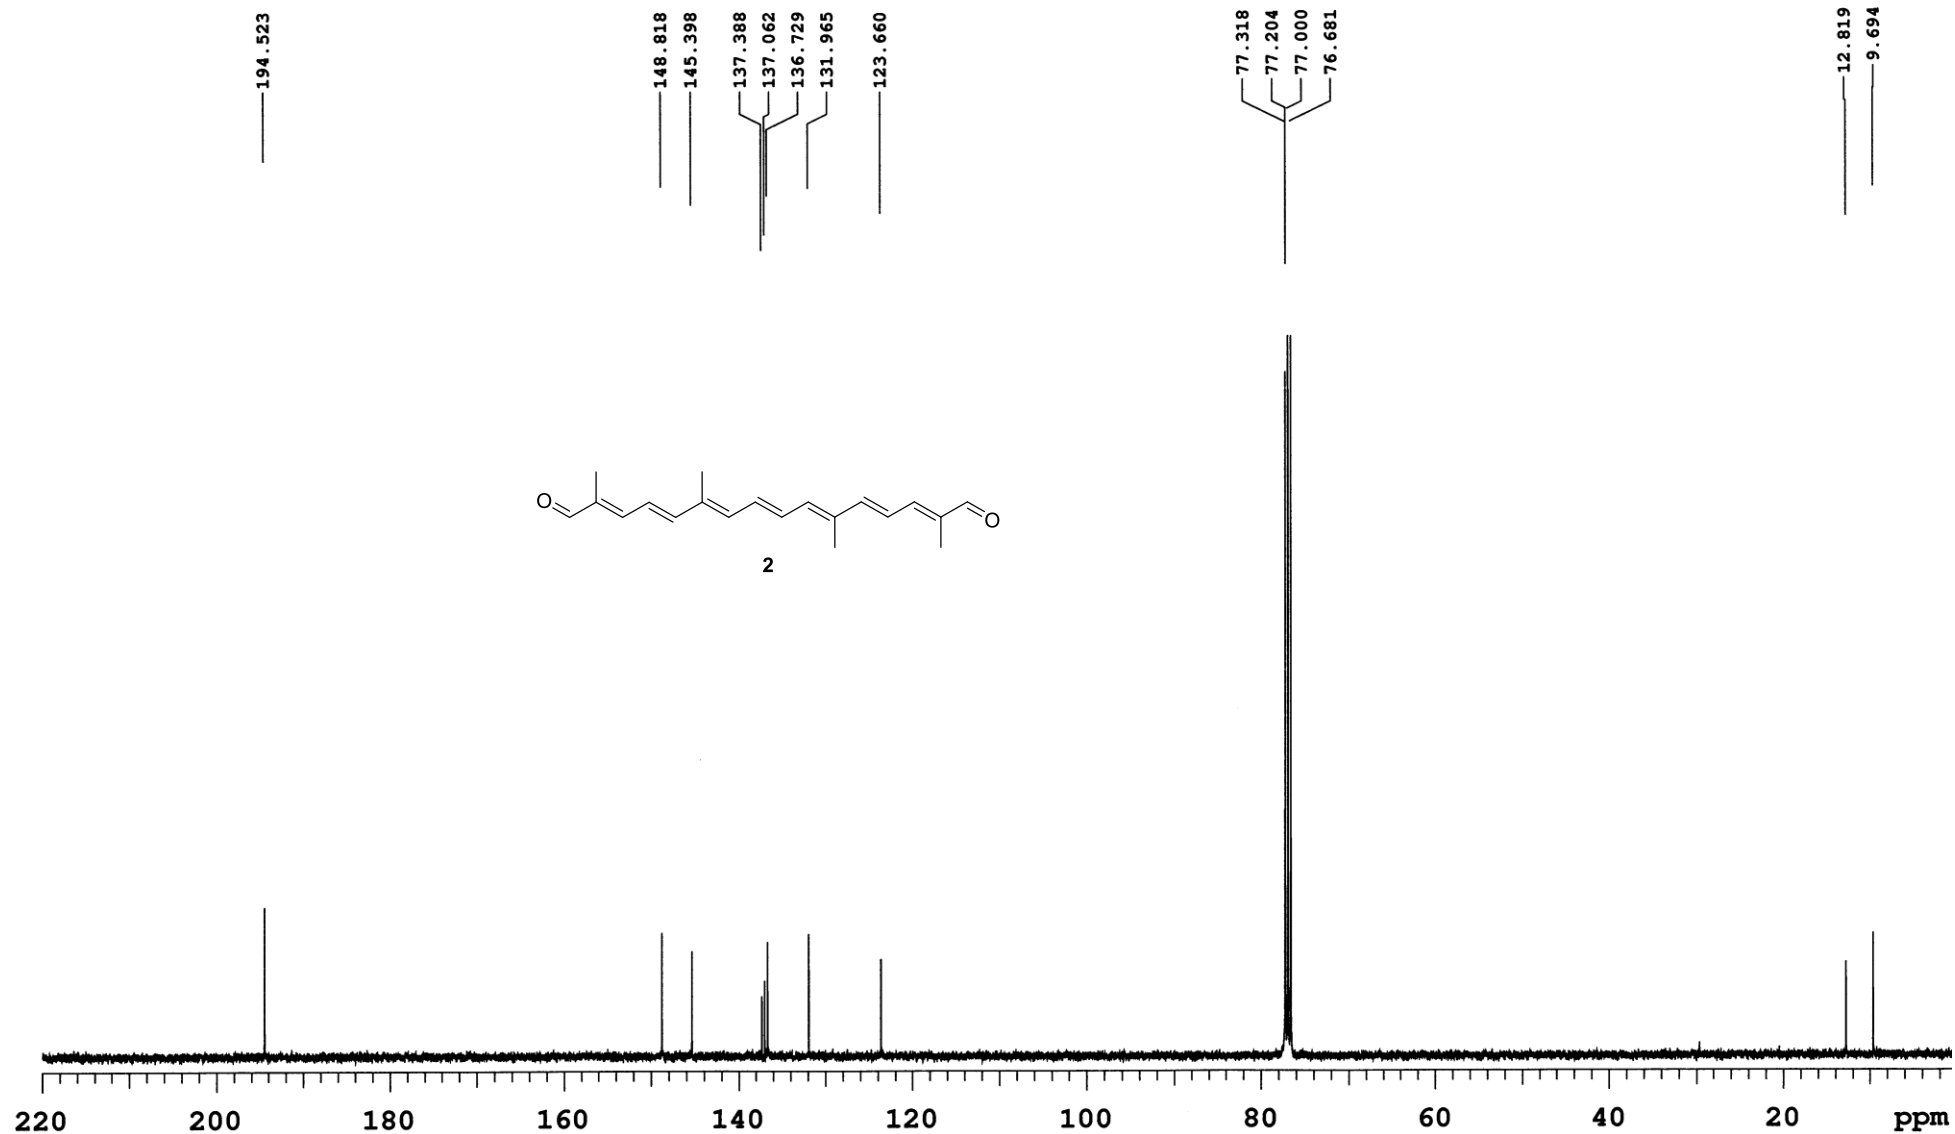



SGS-1492-23re

Sample Name **SGS-1492-23re**  
Date collected **2021-07-05**

Pulse sequence **PROTON**  
Solvent **cdcl3**

Temperature **25**  
Spectrometer **Agilent-NMR.chem.com-vnmr400**

Study owner **vnmr1**  
Operator **vnmr1**

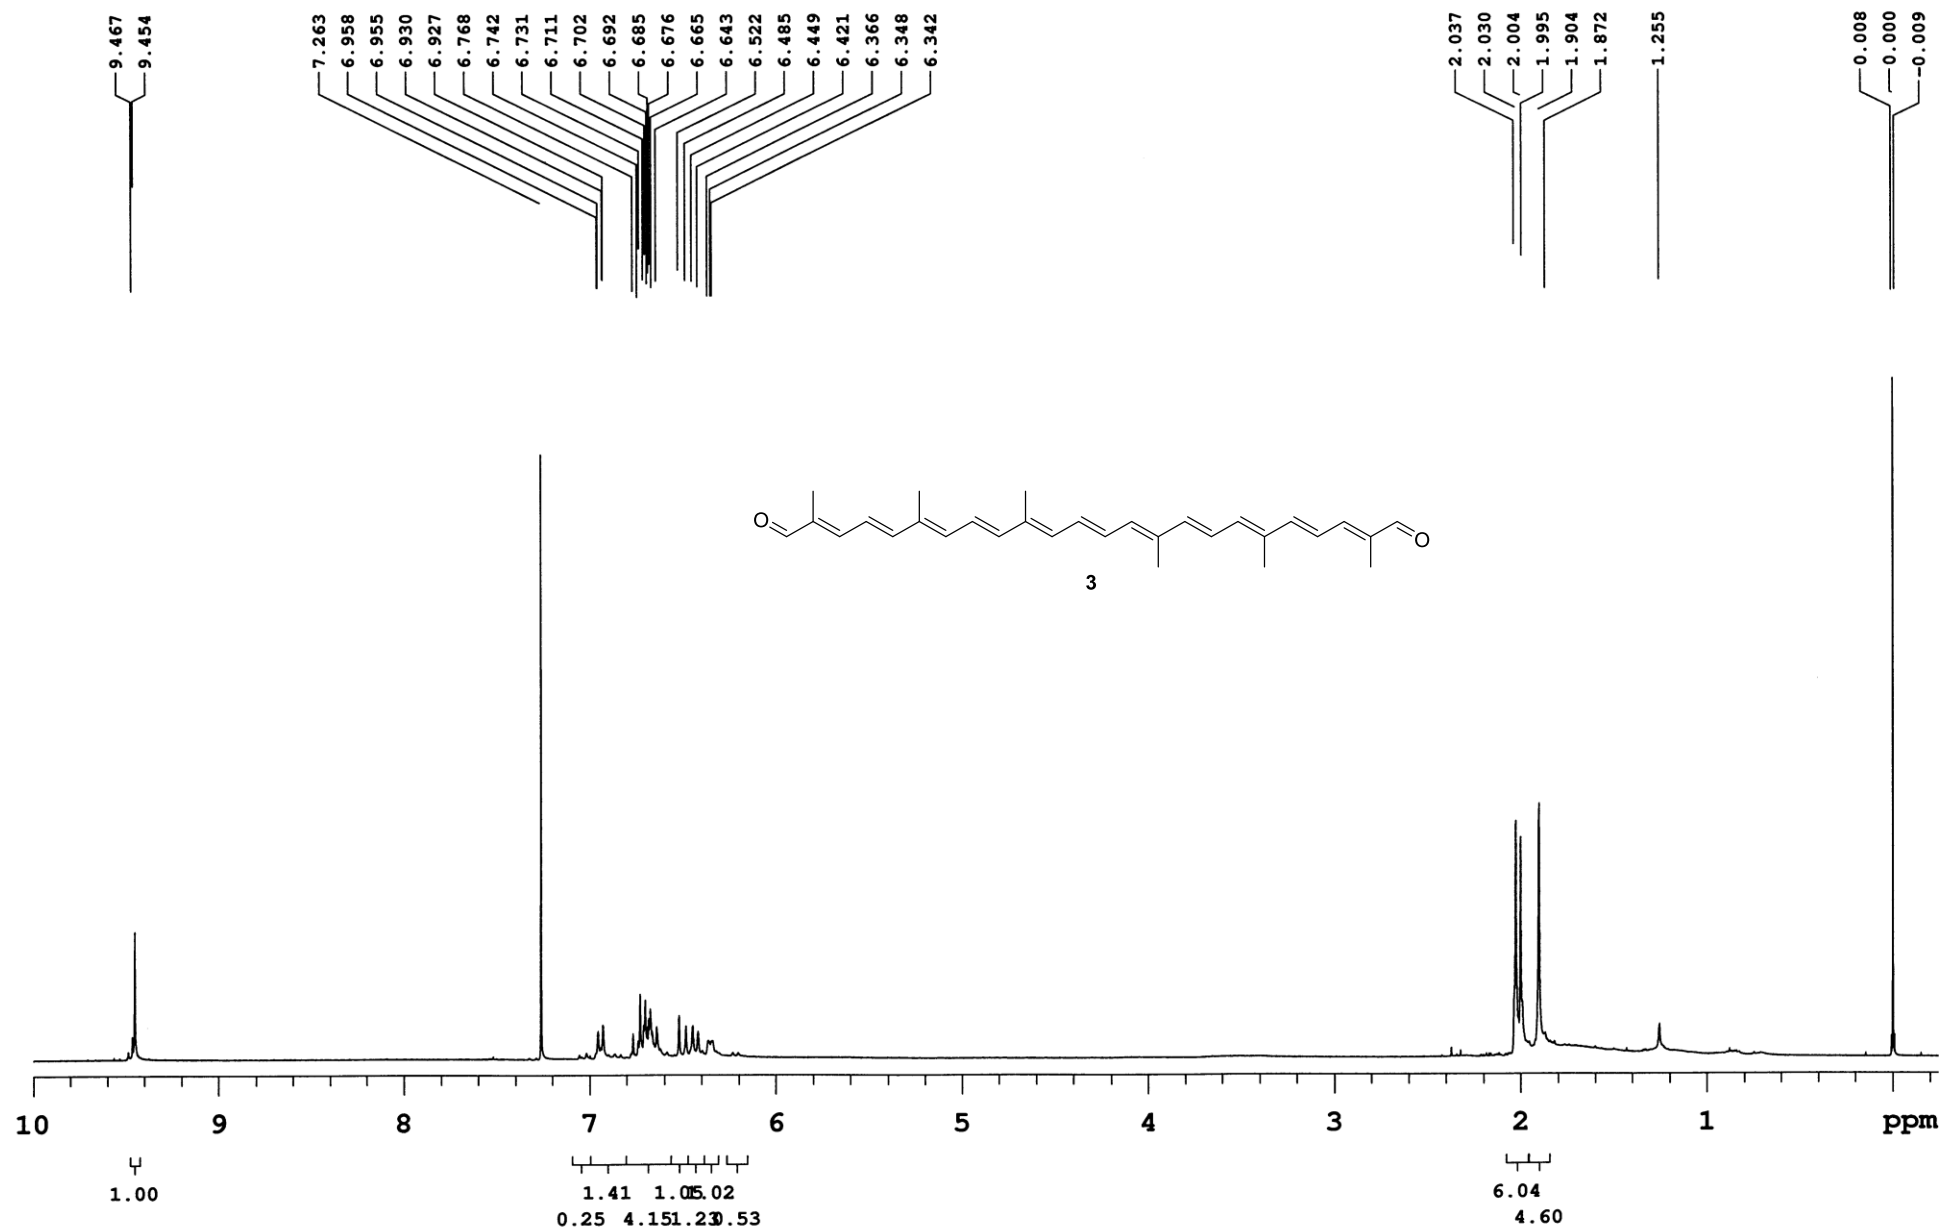

SGS-1492-23re

Sample Name **SGS-1492-23re**  
Date collected **2021-07-05**

Pulse sequence **PROTON**  
Solvent **cdcl3**

Temperature **25**  
Spectrometer **Agilent-NMR.chem.com-vnmr400**

Study owner **vnmr1**  
Operator **vnmr1**

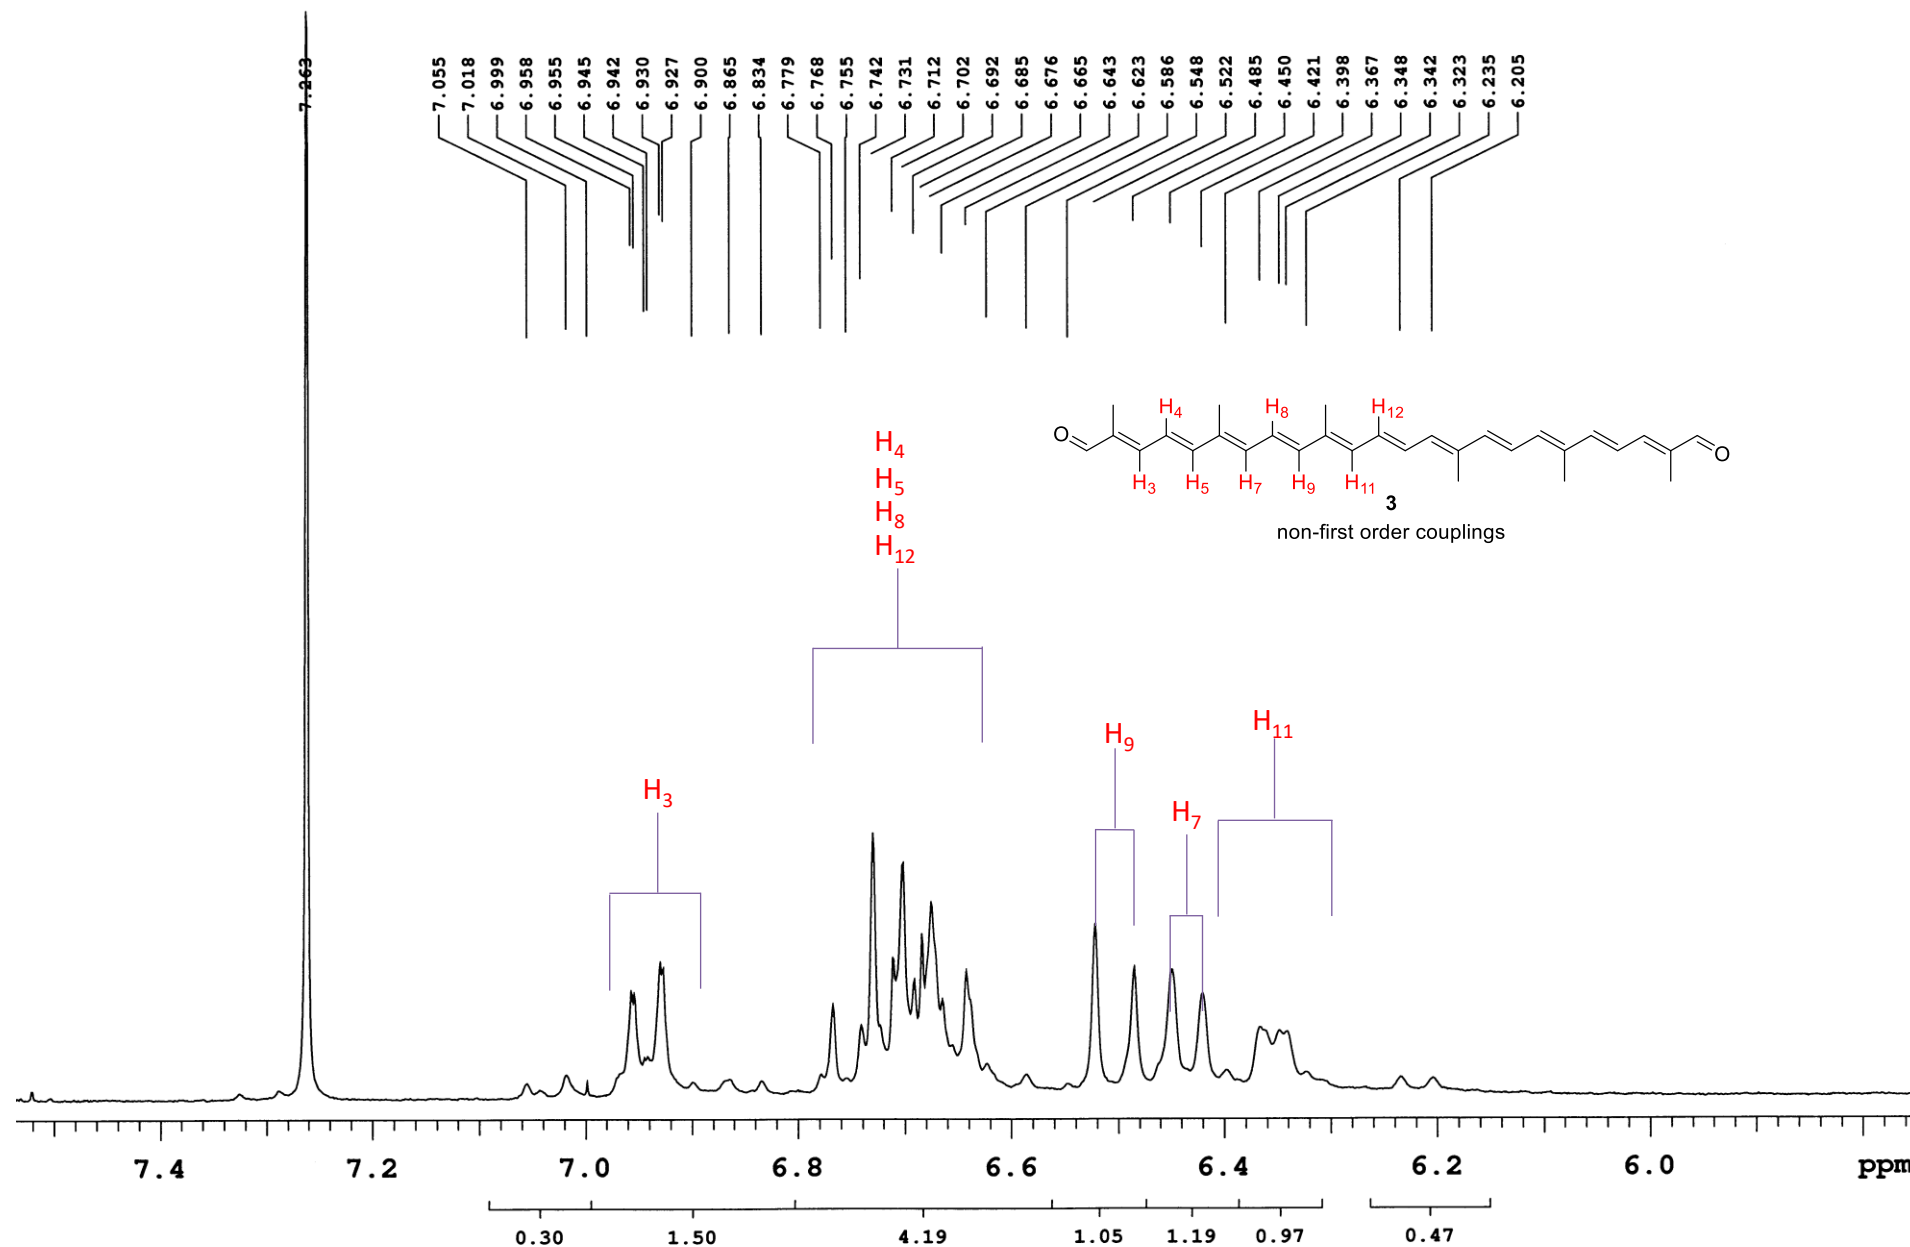

SGS-1492-23re

Sample Name **SGS-1492-23re**  
Date collected **2021-07-02**

Pulse sequence **CARBON**  
Solvent **cdcl3**

Temperature **25**  
Spectrometer **Agilent-NMR.chem.com-vnmrs4000**  
Study owner **vnmr1**  
Operator **vnmr1**

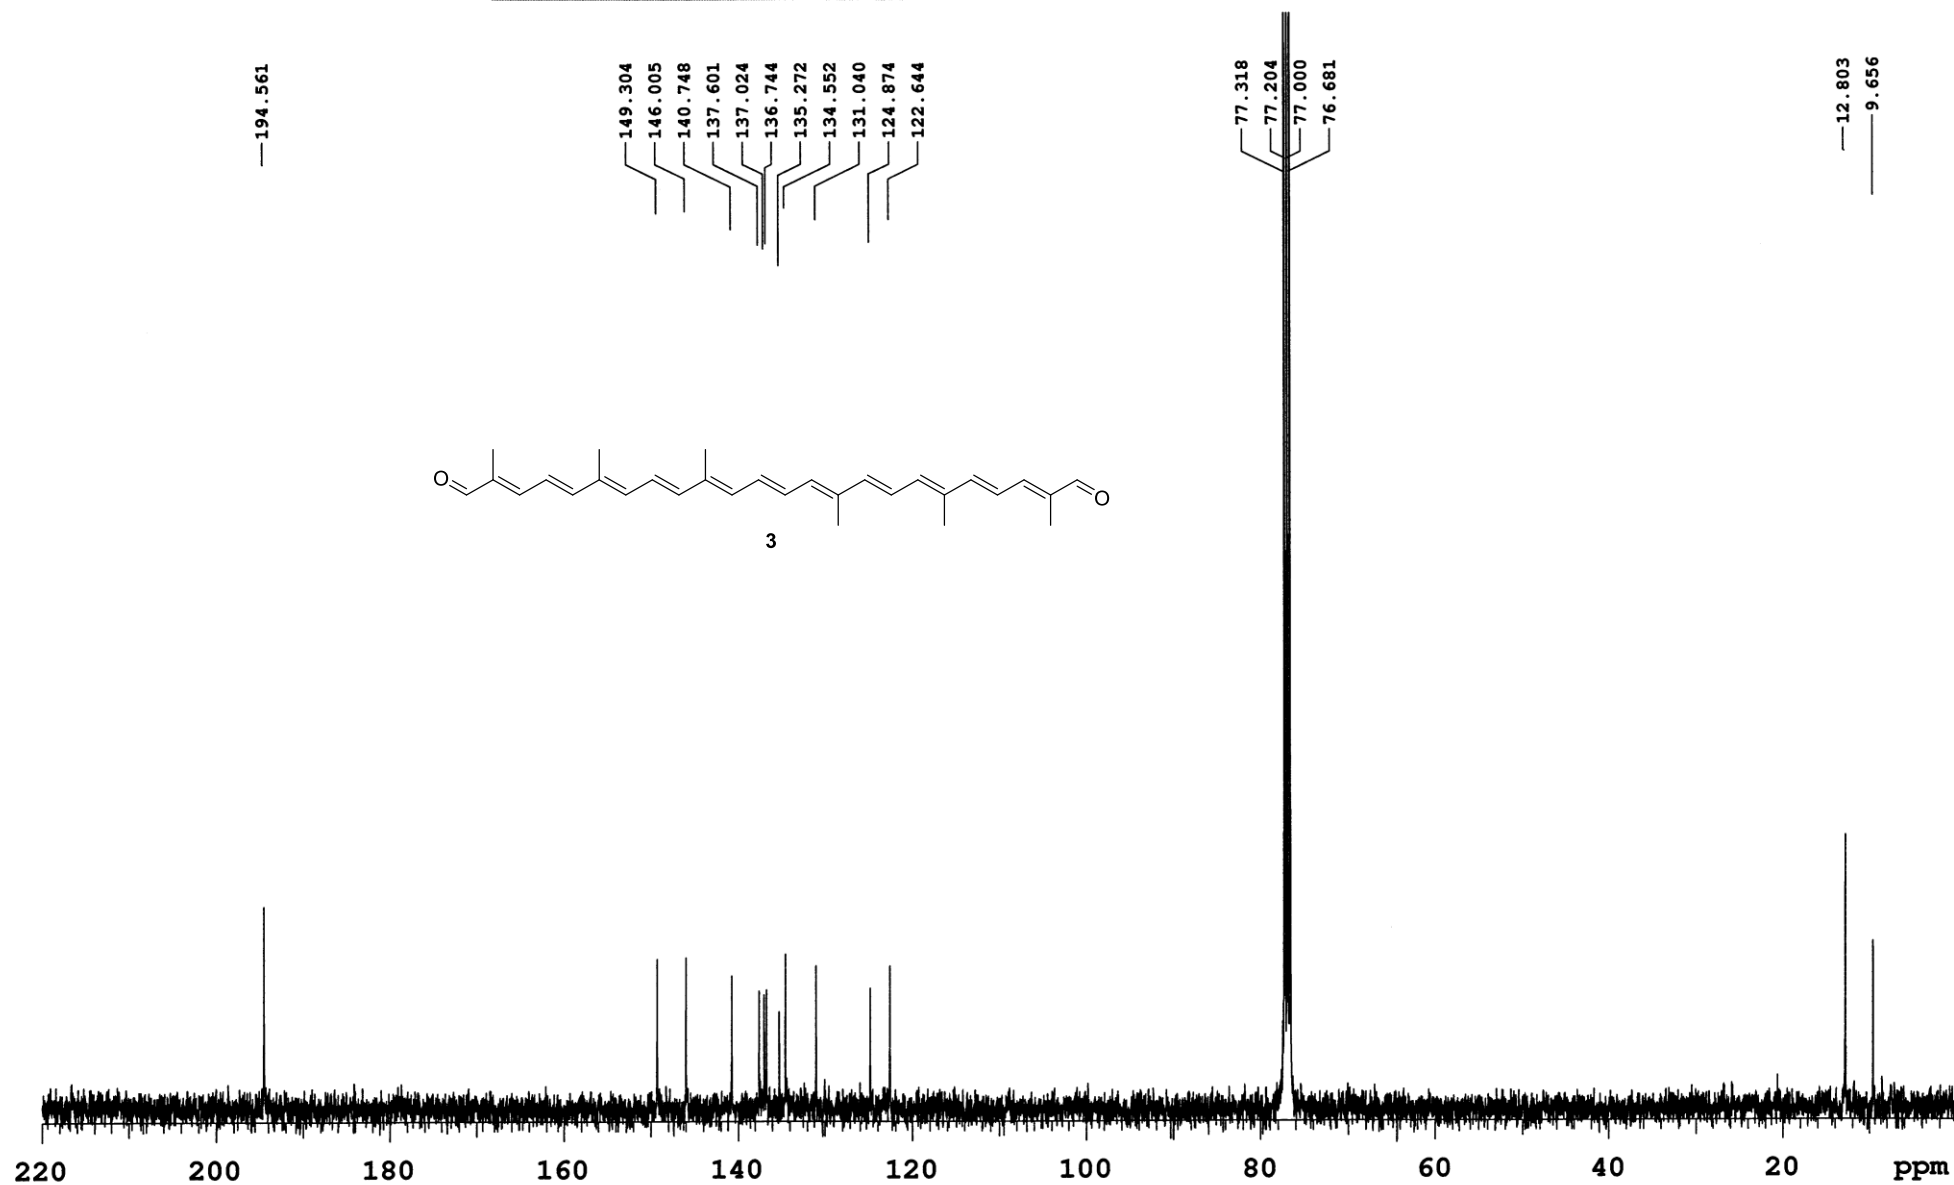

SGS-1332-1re

Sample Name **SGS-1332-1re**  
Date collected **2021-06-02**

Pulse sequence **PROTON**  
Solvent **cdcl3**

Temperature **25**  
Spectrometer **Agilent-NMR.chem.com-vnmrs400**  
Study owner **vnmr1**  
Operator **vnmr1**

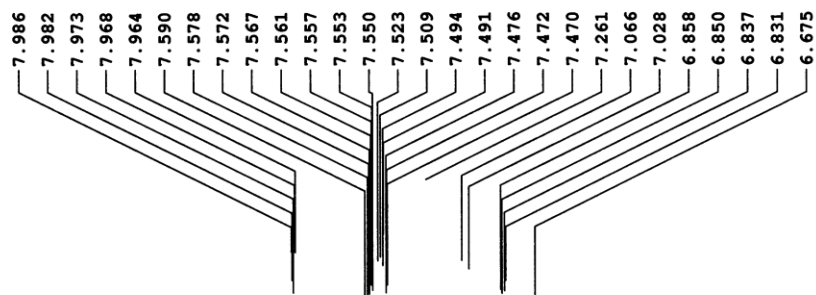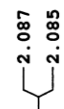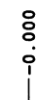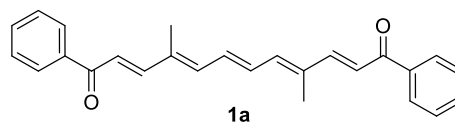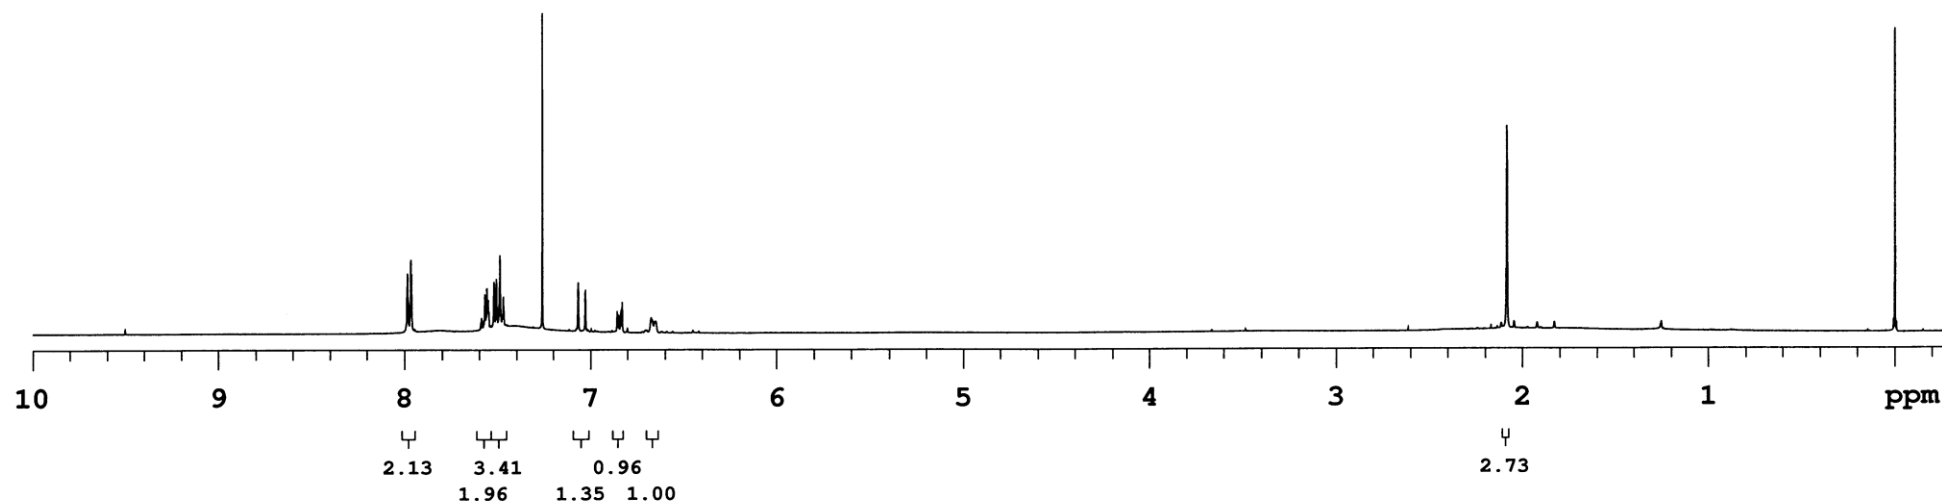

SGS-1332-1re

Sample Name **SGS-1332-1re**  
Date collected **2021-06-02**Pulse sequence **PROTON**  
Solvent **cdcl3**Temperature **25**  
Spectrometer **Agilent-NMR.chem.com-vnmr400**Study owner **vnmr1**  
Operator **vnmr1**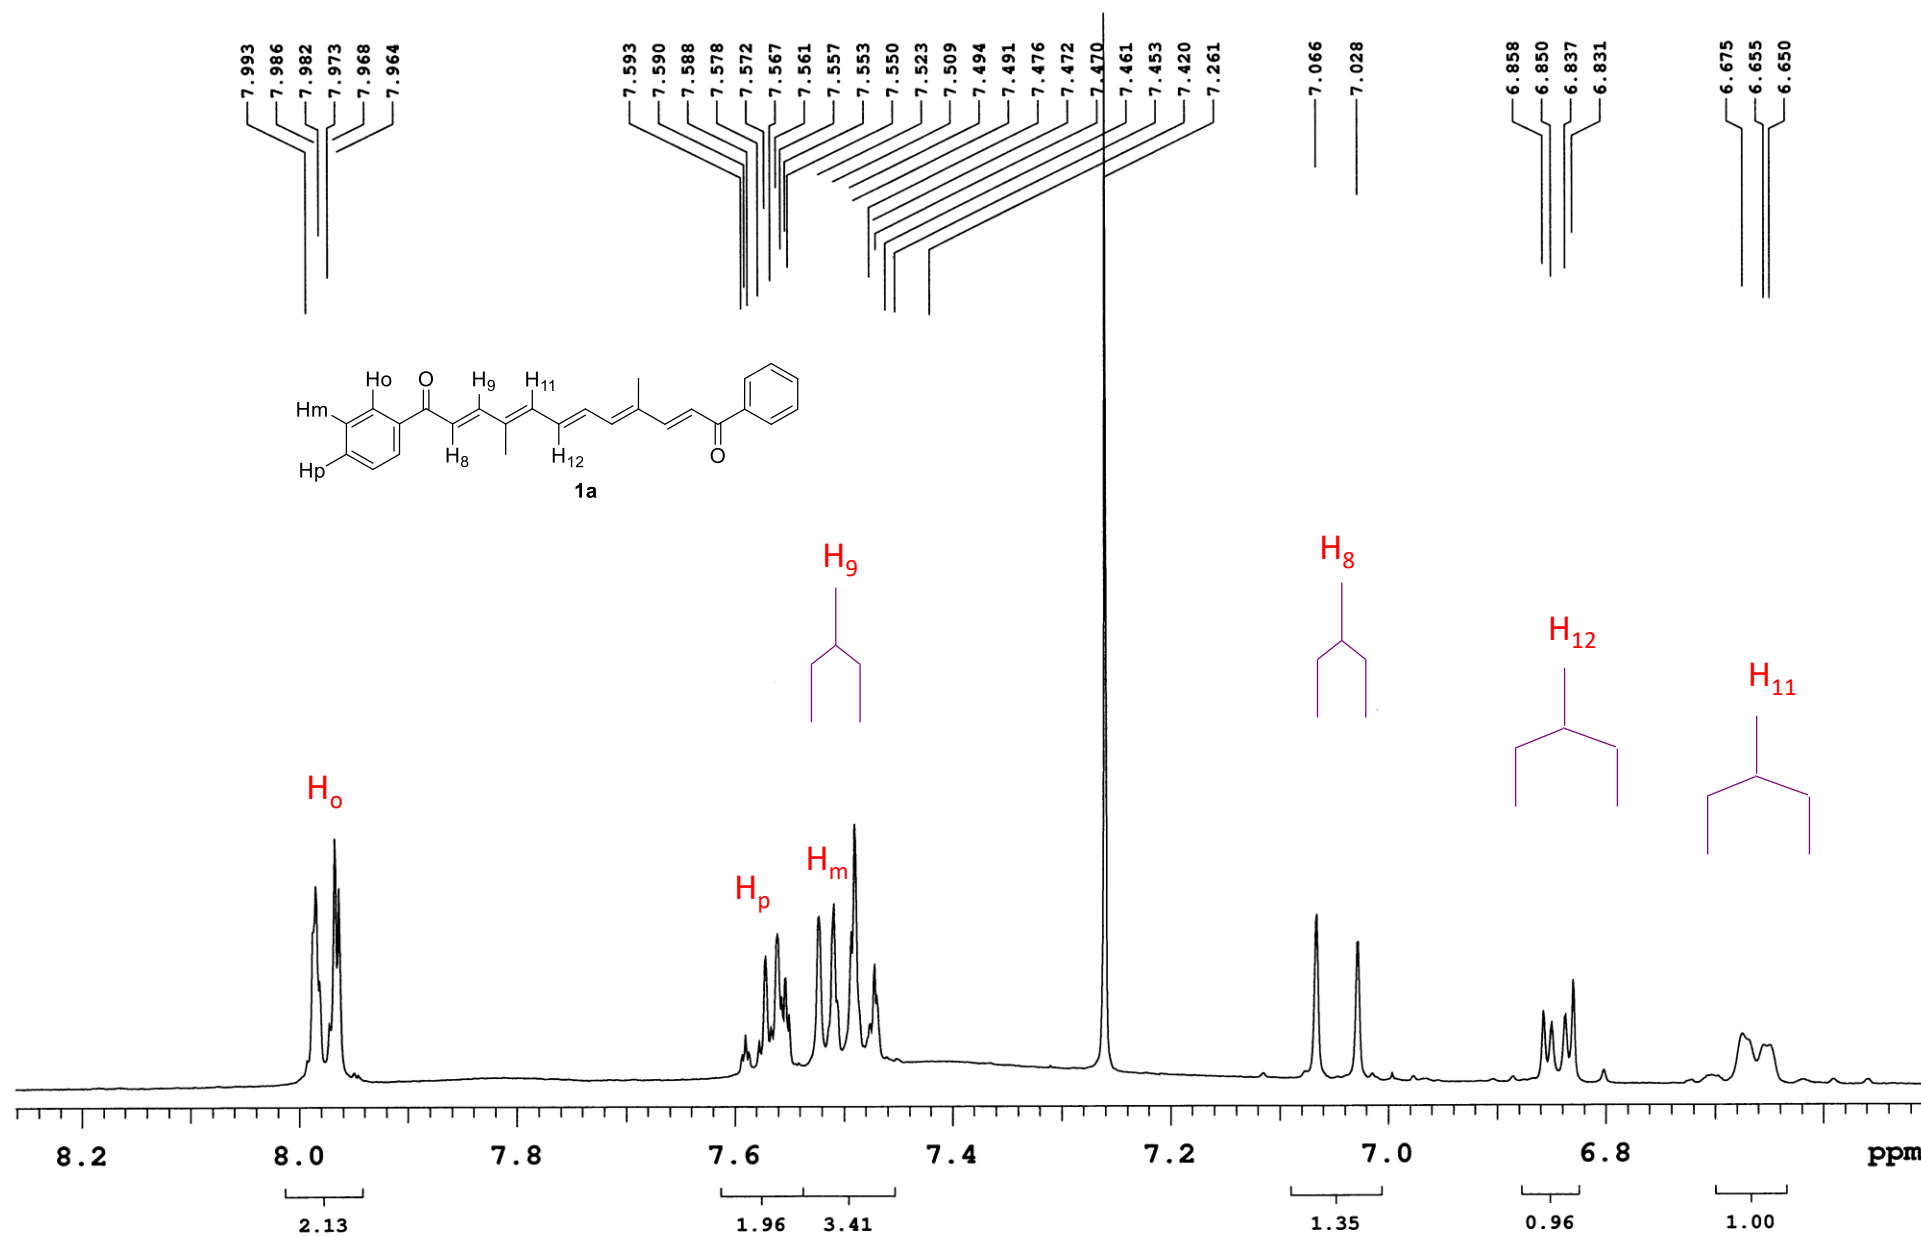

SGS-1396-2re

Sample Name **SGS-1396-2re**  
Date collected **2021-06-16**

Pulse sequence **PROTON**  
Solvent **cdcl3**

Temperature **25**  
Spectrometer **Agilent-NMR.chem.com-vnmr400**  
Study owner **vnmr1**  
Operator **vnmr1**

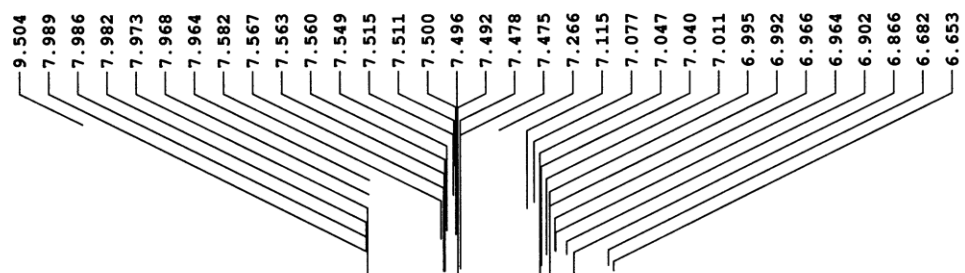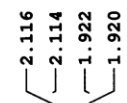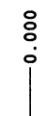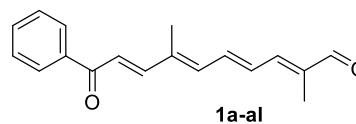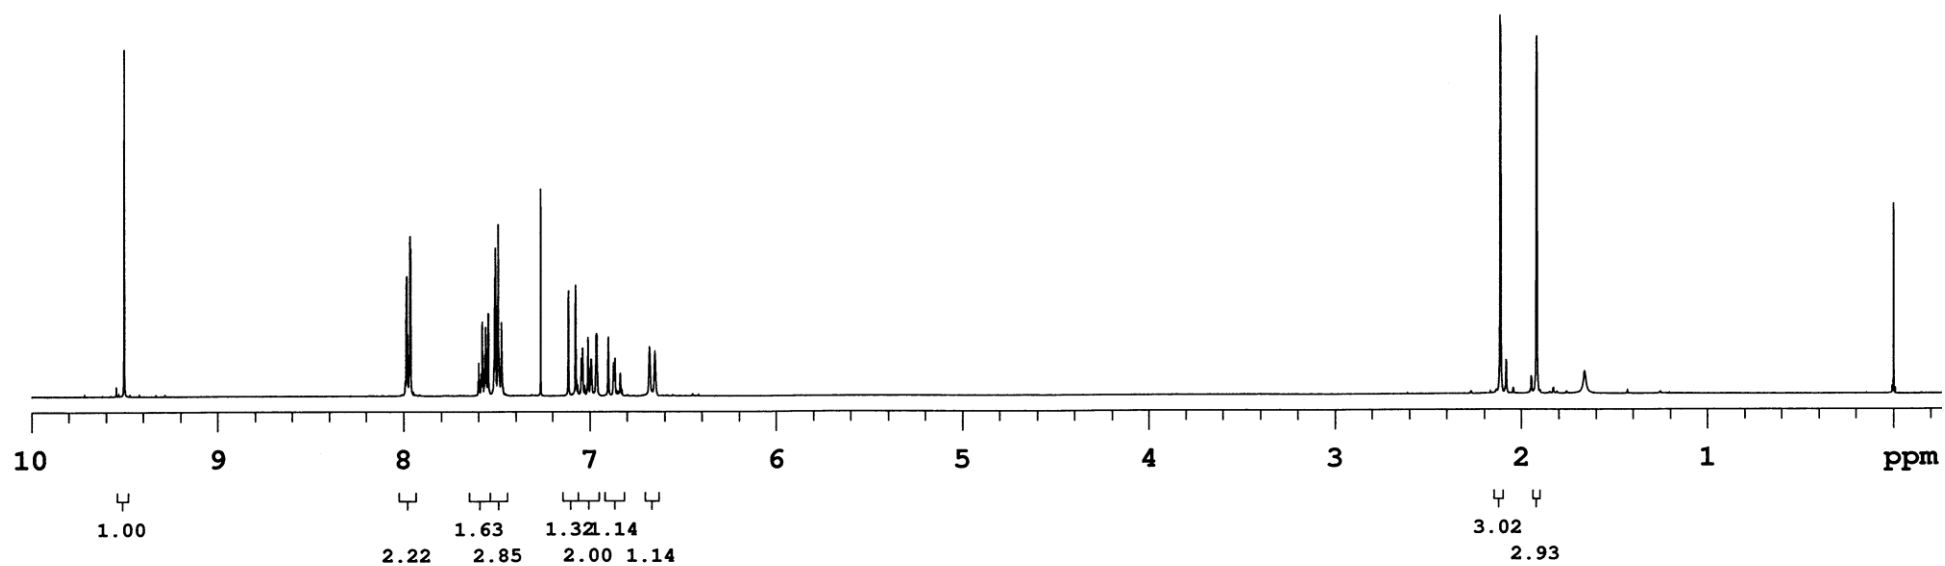

SGS-1396-2re

Sample Name **SGS-1396-2re**  
Date collected **2021-06-16**

Pulse sequence **PROTON**  
Solvent **cdcl3**

Temperature **25**  
Spectrometer **Agilent-NMR.chem.com-vnmr400**

Study owner **vnmr1**  
Operator **vnmr1**

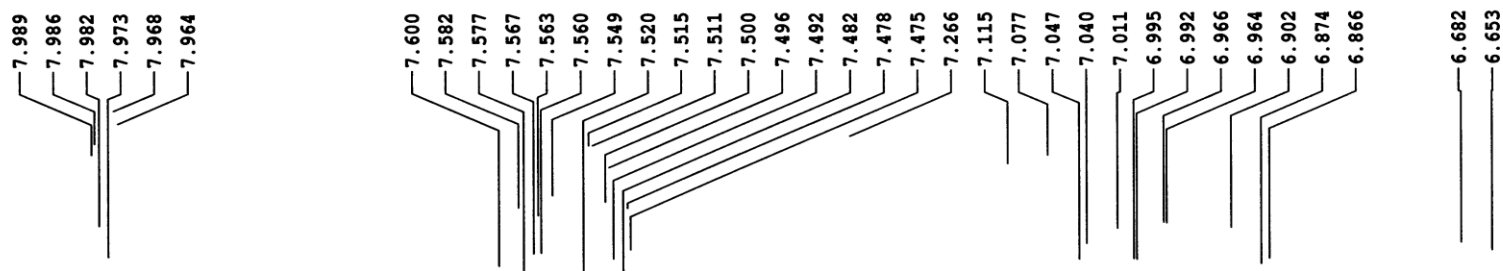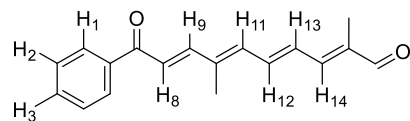

1a-al

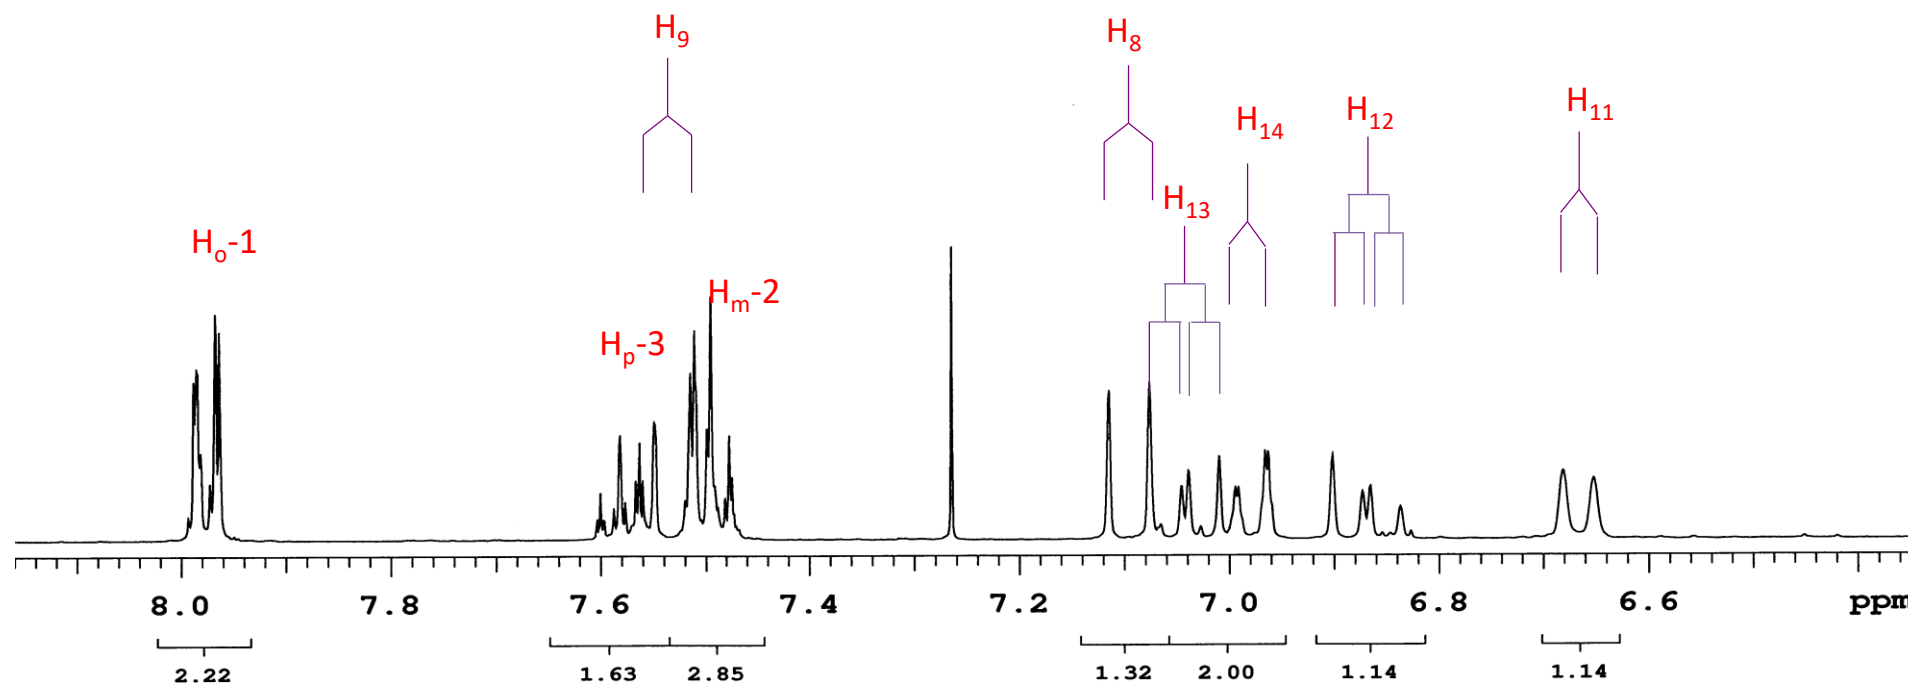

SGS-1396-2re-13C

Sample Name **SGS-1396-2re-13C**  
Date collected **2021-06-18**

Pulse sequence **CARBON**  
Solvent **cdcl3**

Temperature **25**  
Spectrometer **Agilent-NMR.chem.com-vnmrs400**

Study owner **vnmr1**  
Operator **vnmr1**

194.470  
190.375

147.977  
147.476  
139.156  
138.867  
138.564  
138.238  
136.099  
132.777  
131.222  
128.621  
128.401  
122.811

77.341  
77.022  
76.704

13.061  
9.777

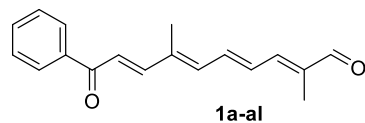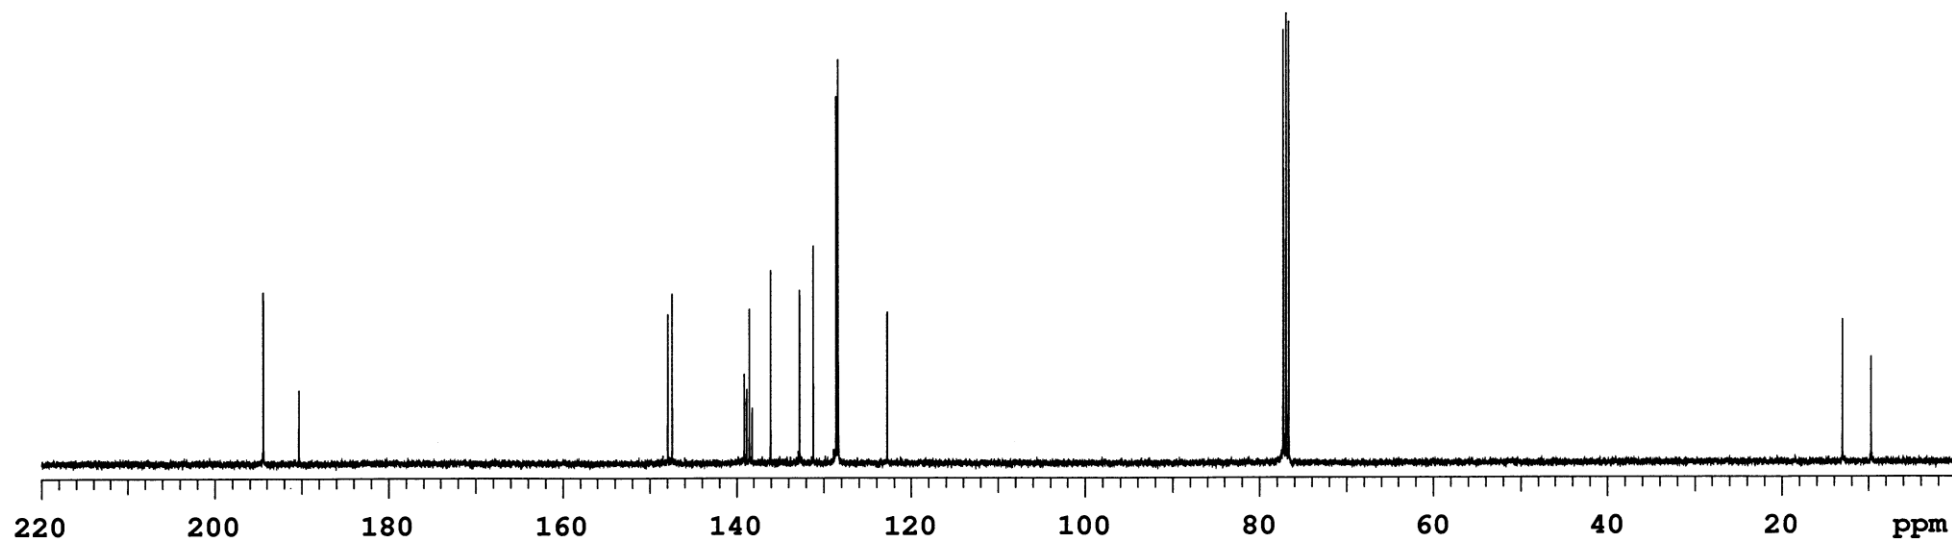



SGS-1420-12re

Sample Name **SGS-1420-12re**  
Date collected **2021-06-14**

Pulse sequence **PROTON**  
Solvent **cdcl3**

Temperature **25**  
Spectrometer **Agilent-NMR.chem.com-vnmr400**

Study owner **vnmr1**  
Operator **vnmr1**

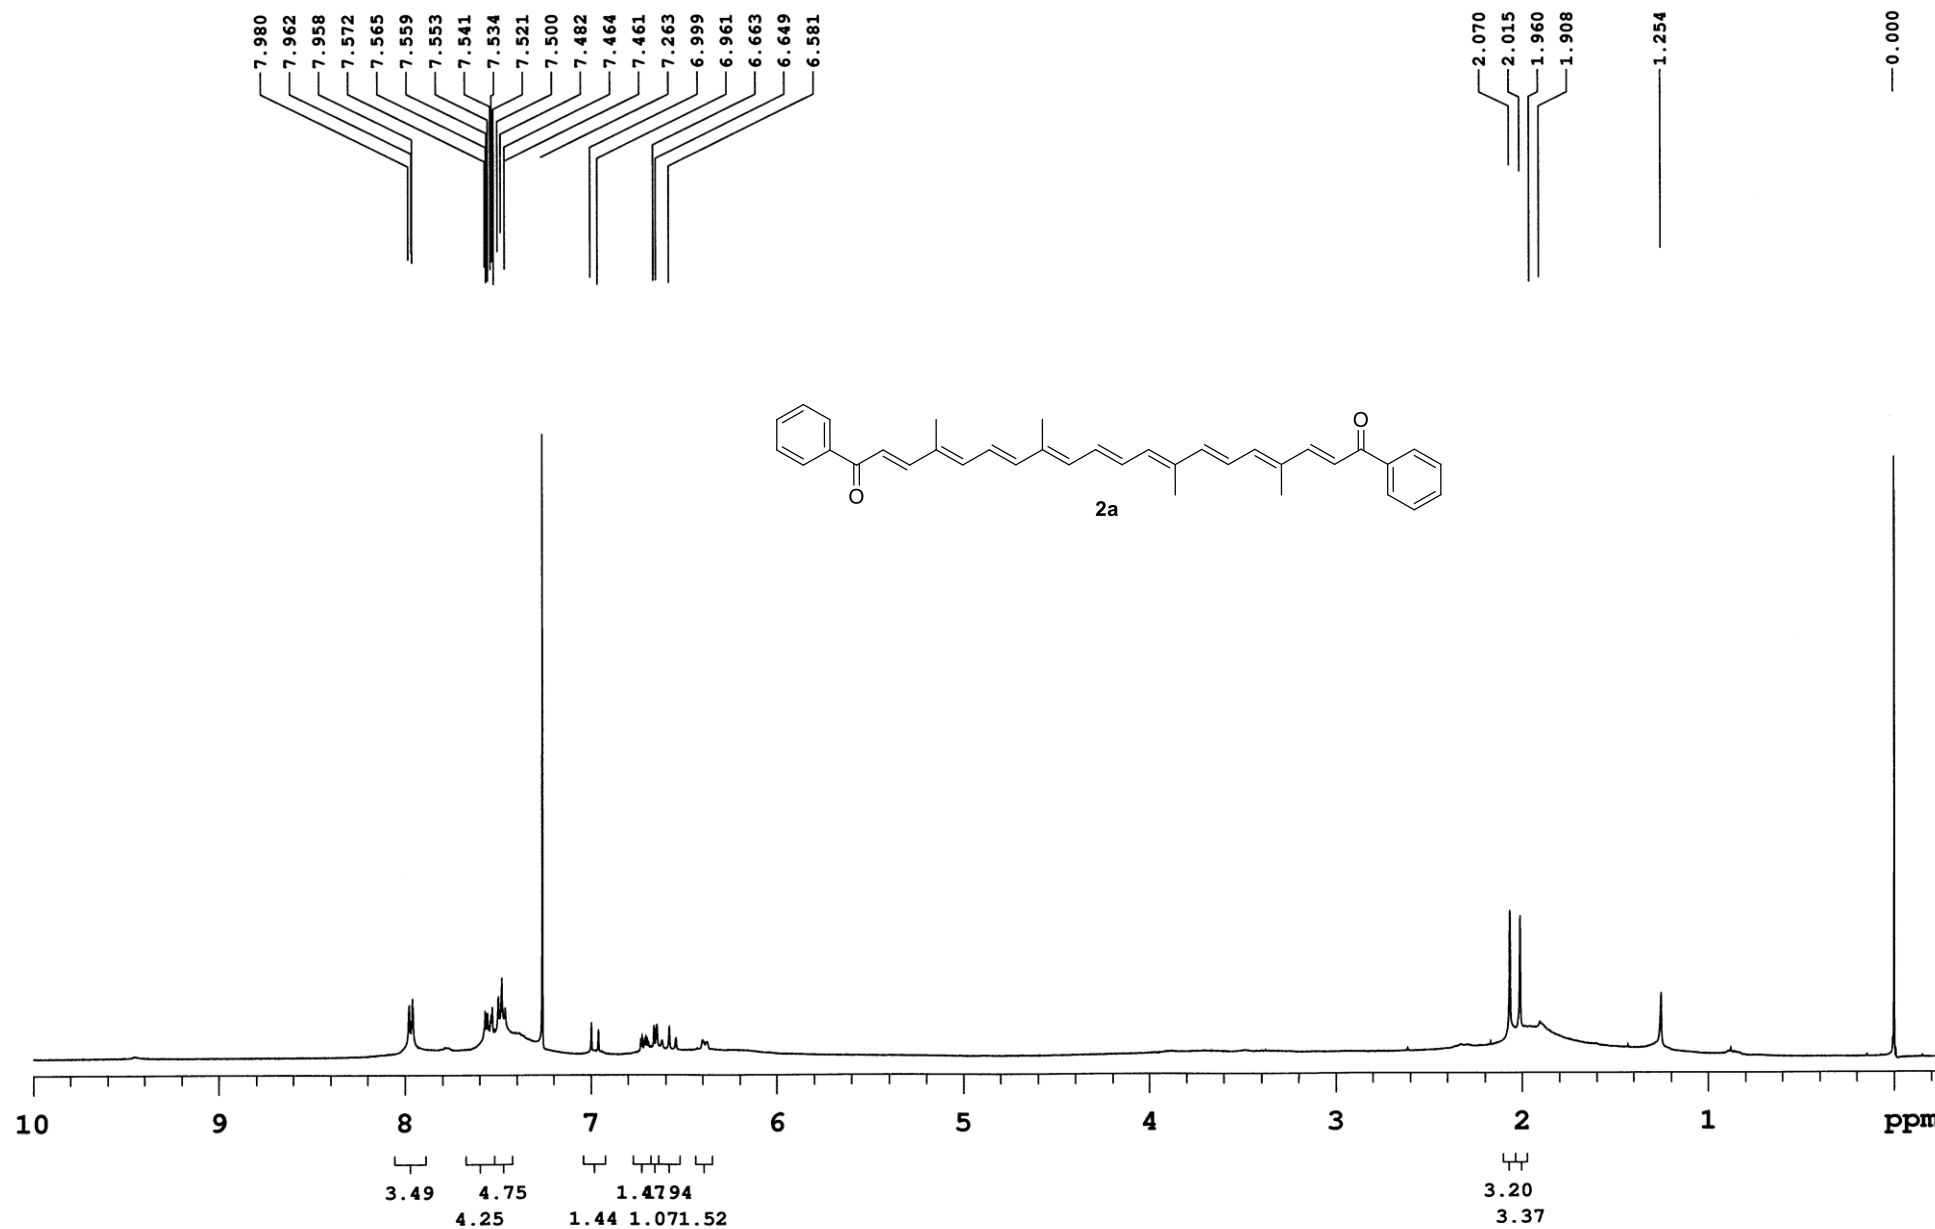

SGS-1420-12re

Sample Name **SGS-1420-12re**  
Date collected **2021-06-14**Pulse sequence **PROTON**  
Solvent **cdcl3**Temperature **25**  
Spectrometer **Agilent-NMR.chem.com-vnmrs400**  
Study owner **vnmr1**  
Operator **vnmr1**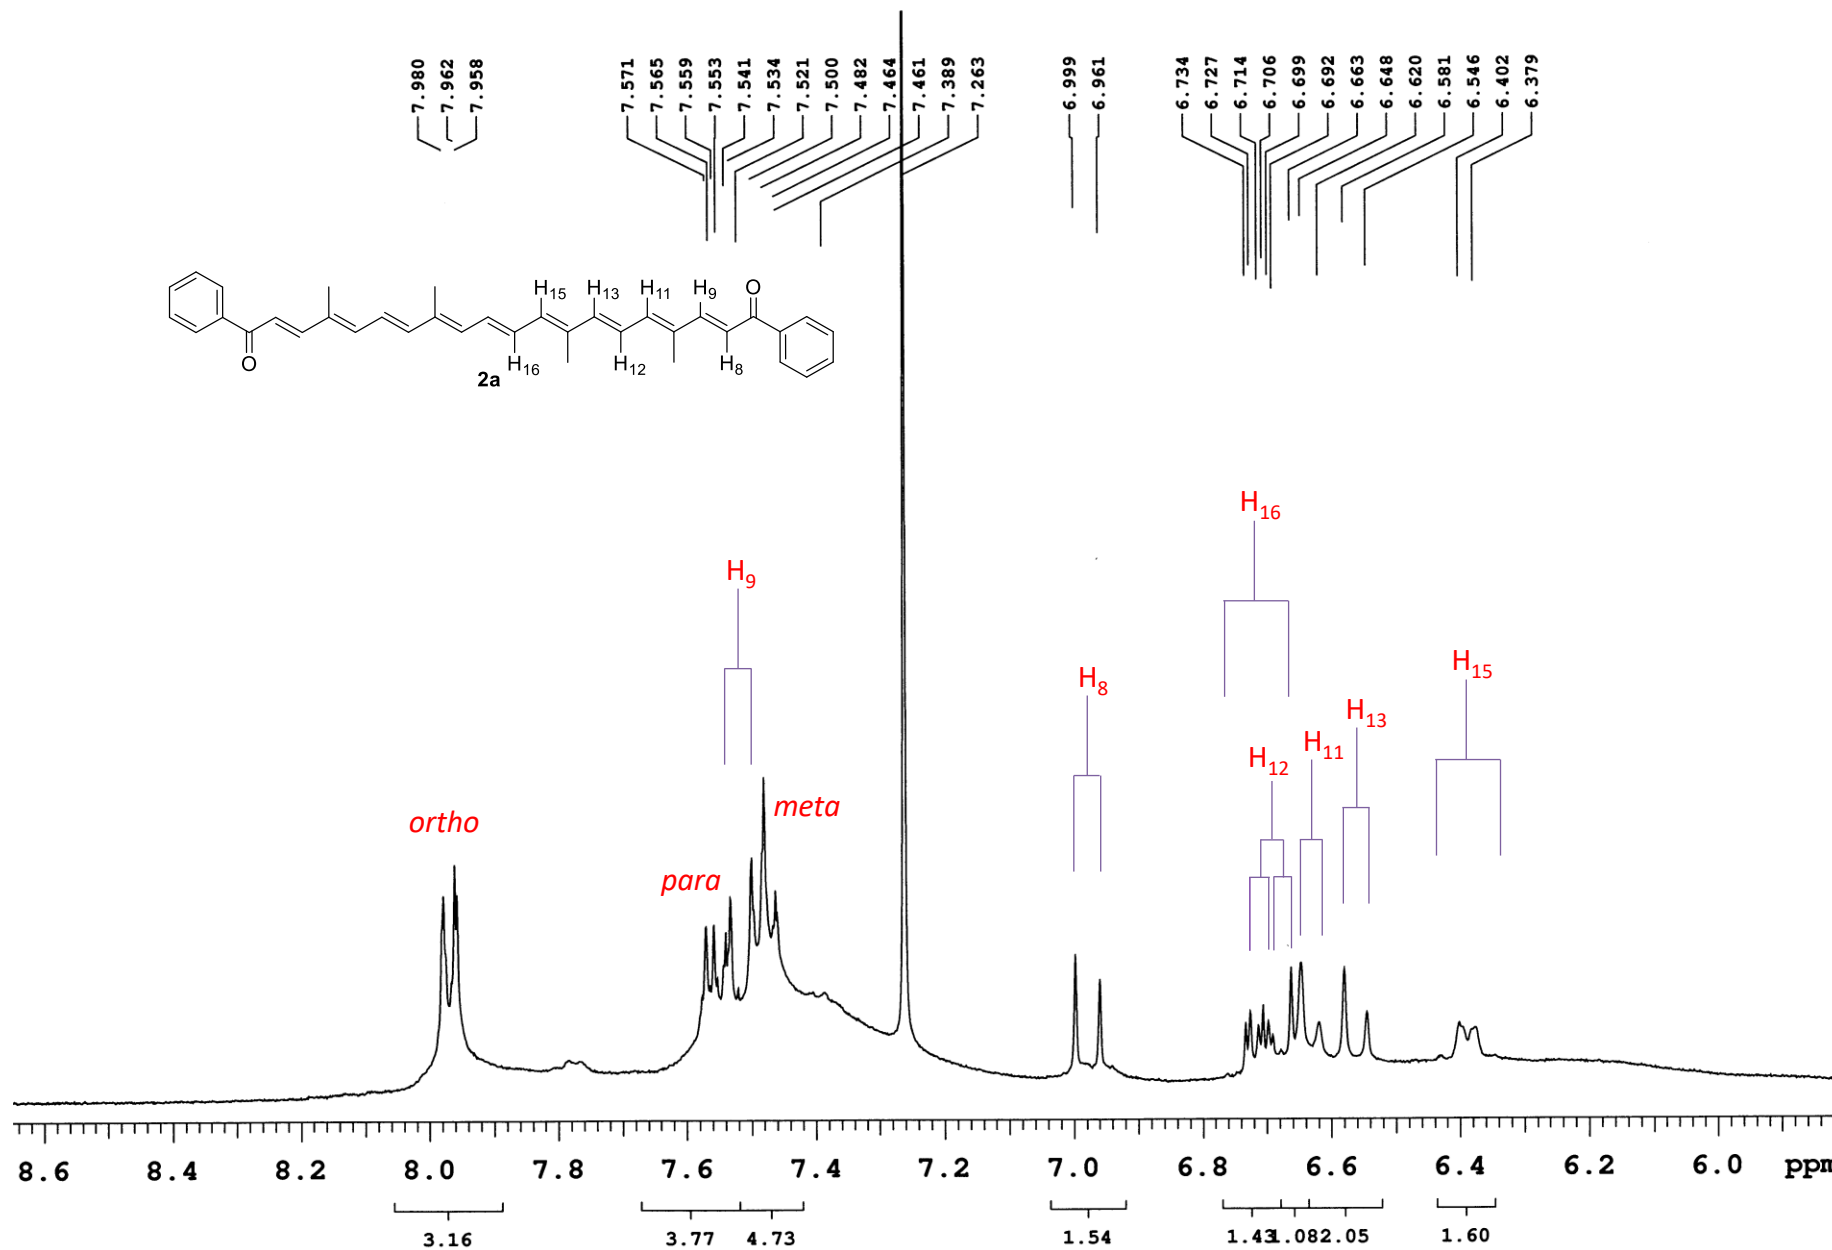

| Parameter              | Value                      |
|------------------------|----------------------------|
| Title                  | SGS-1420-11re-13C_CARBO_01 |
| Instrument             | vnmrs                      |
| Solvent                | cdcl3                      |
| Pulse Sequence         | s2pul                      |
| Probe                  | 5mm_ATB                    |
| Number of Scans        | 2000                       |
| Acquisition Date       | 2021-11-16T17:32:46        |
| Spectrometer Frequency | 100.60                     |

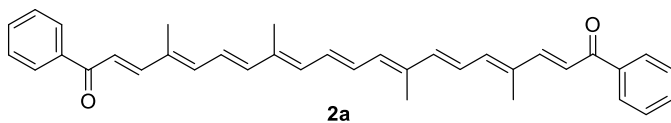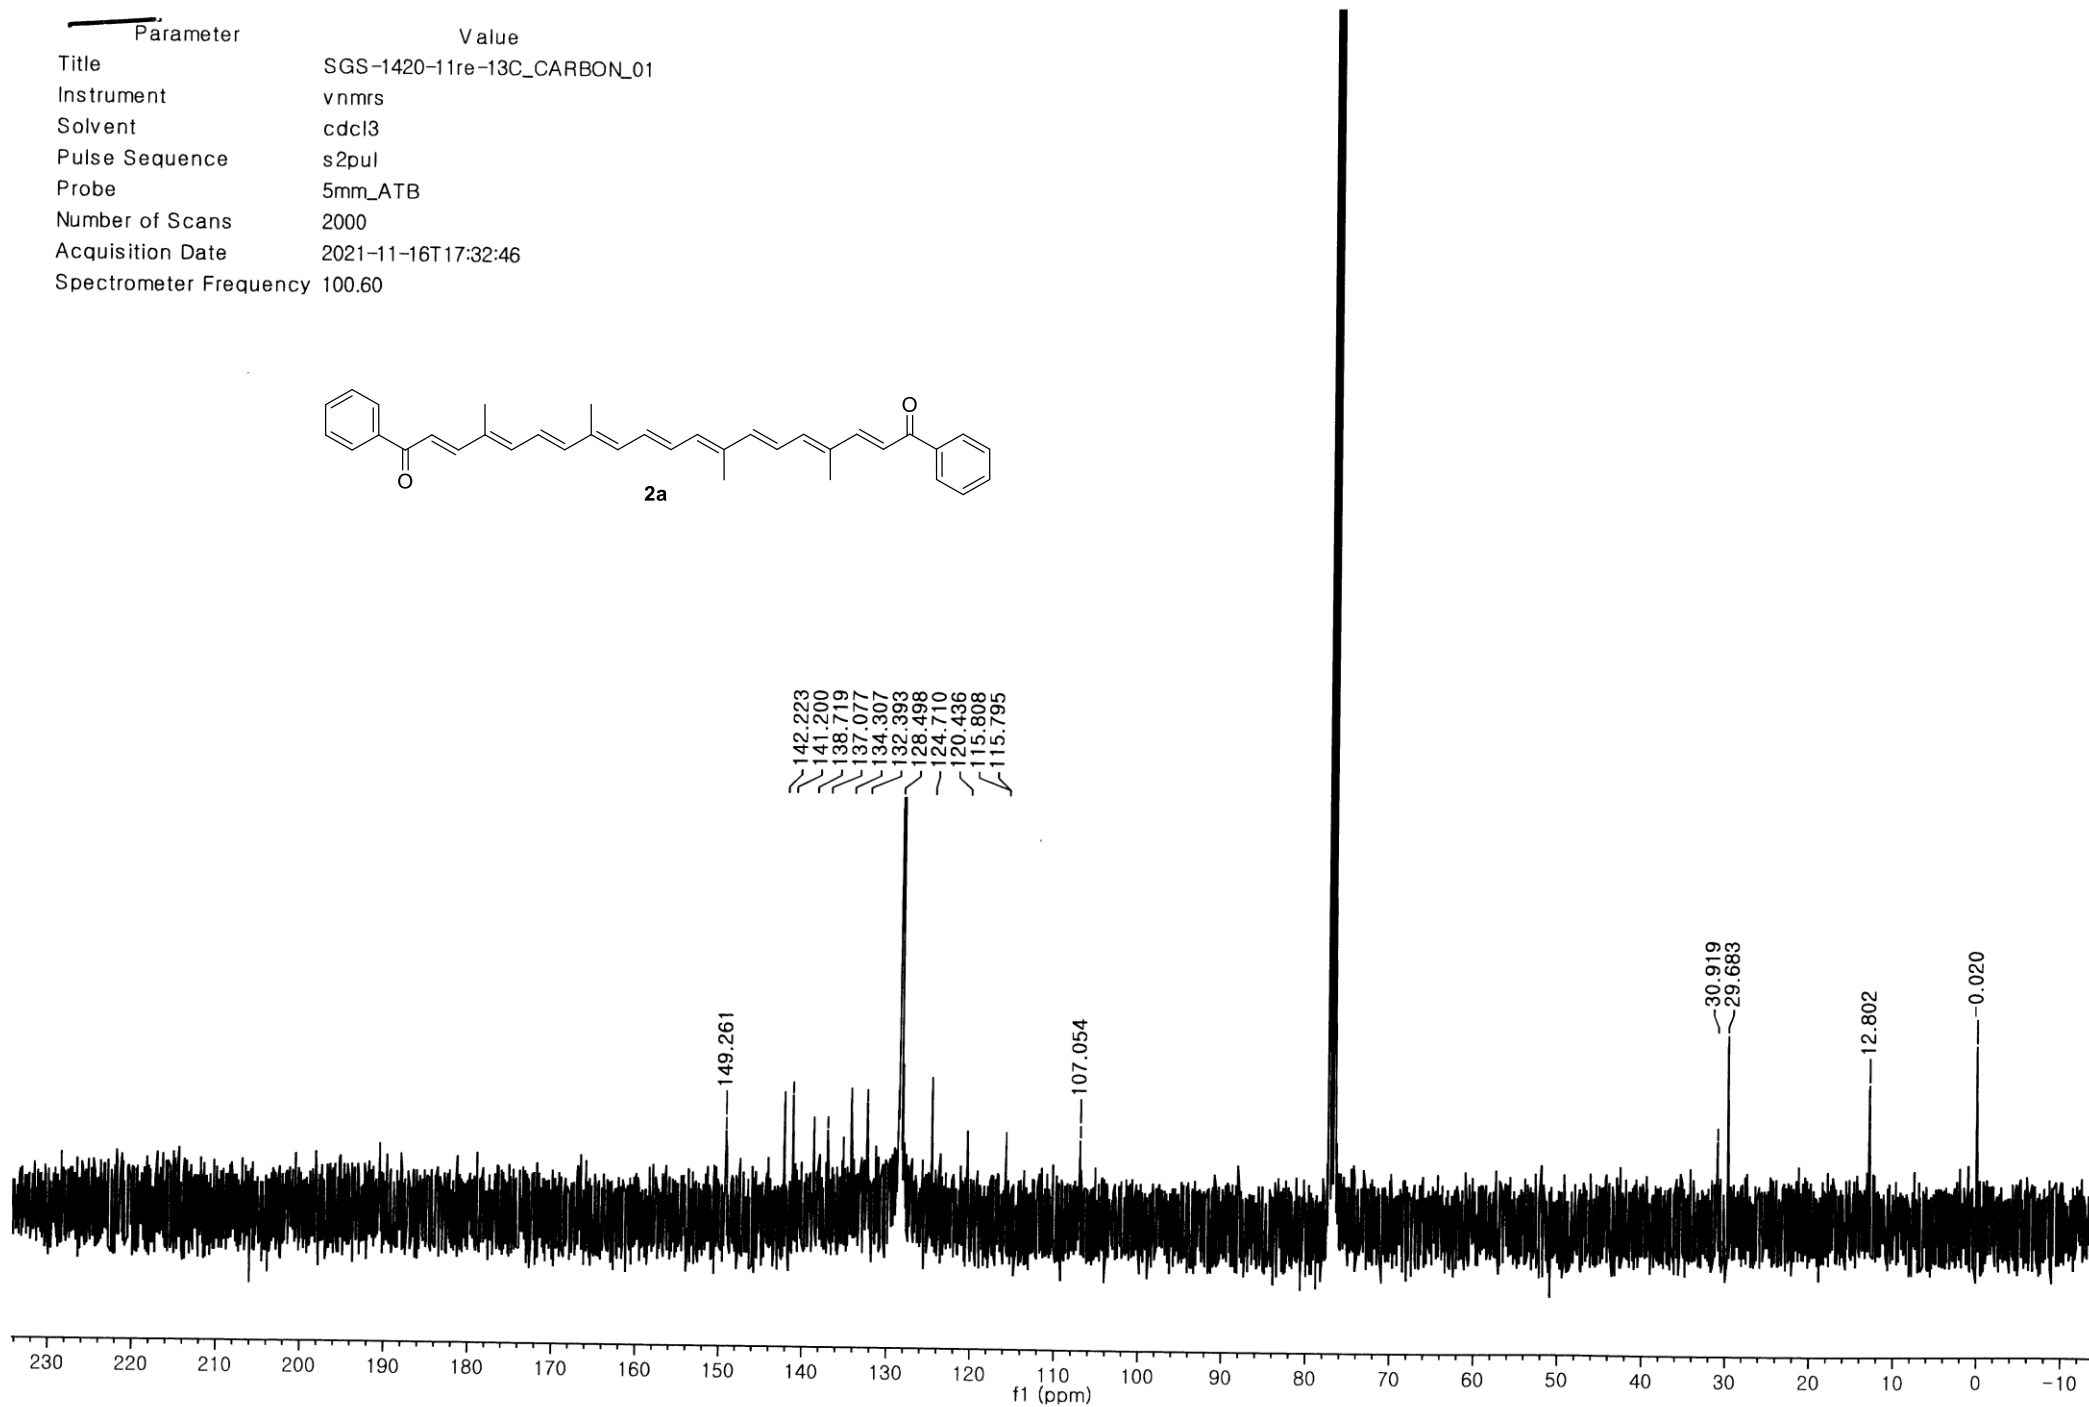

SGS-1421-11re

Sample Name **SGS-1421-11re**  
Date collected **2021-11-16**

Pulse sequence **PROTON**  
Solvent **cdcl3**

Temperature **25**  
Spectrometer **Agilent-NMR.chem.com-vnmrs400**

Study owner **vnmr1**  
Operator **vnmr1**

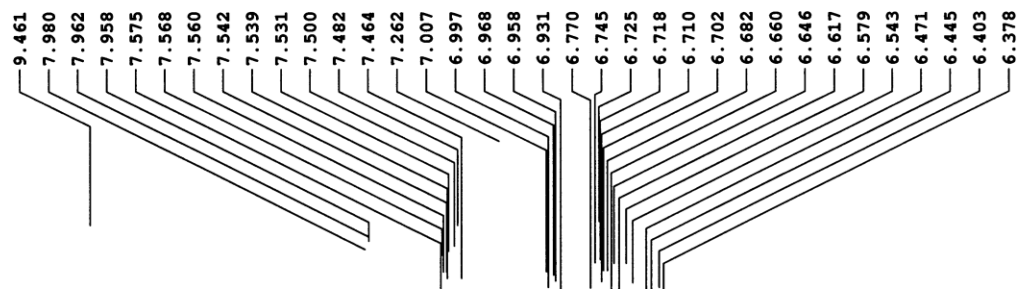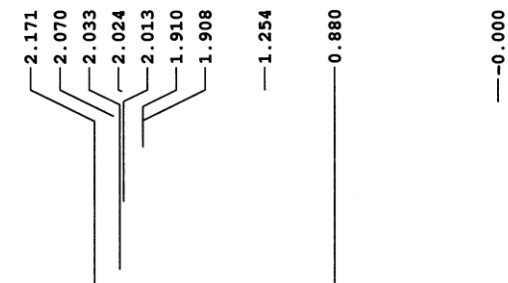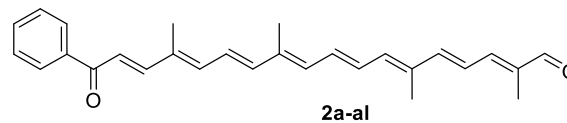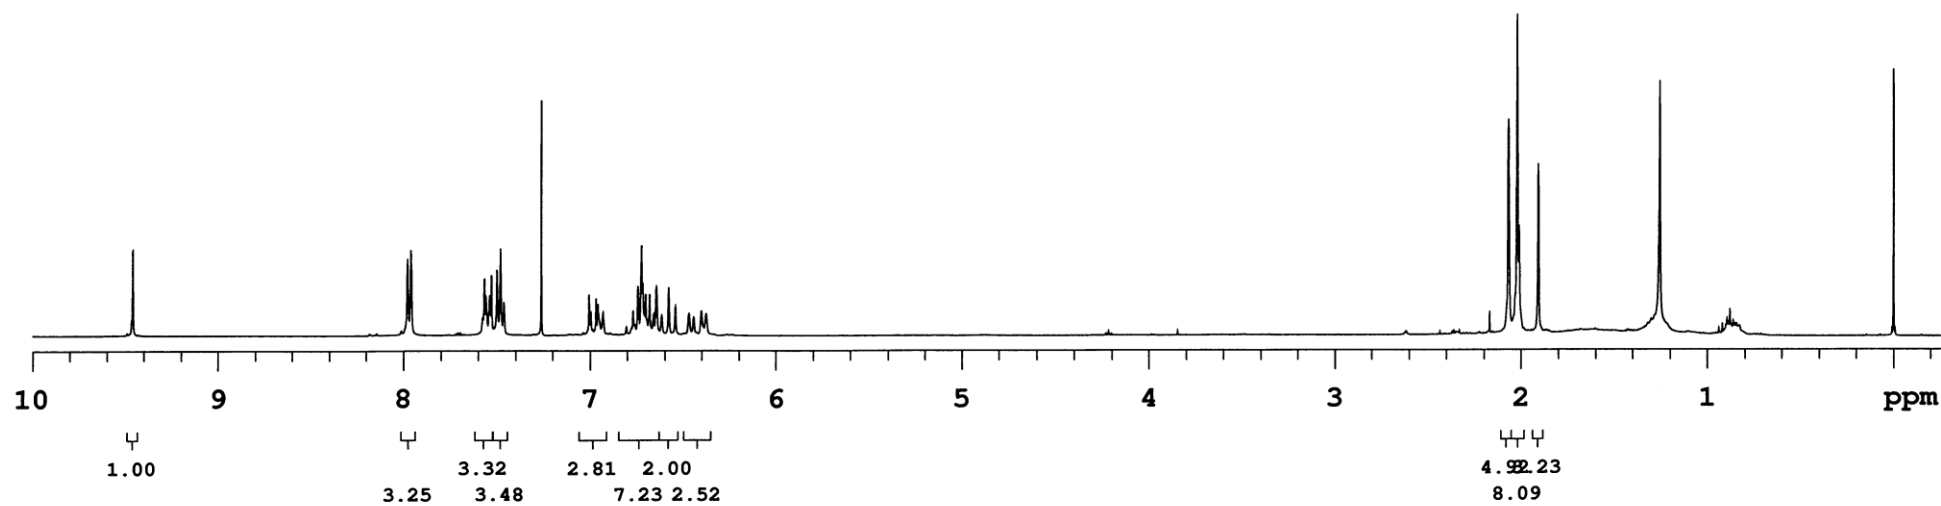

SGS-1421-11re

Sample Name **SGS-1421-11re**  
Date collected **2021-11-16**

Pulse sequence **PROTON**  
Solvent **cdcl3**

Temperature **25**  
Spectrometer **Agilent-NMR.chem.com-vnmr400**

Study owner **vnmr1**  
Operator **vnmr1**

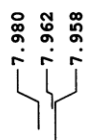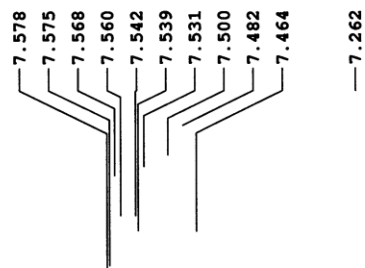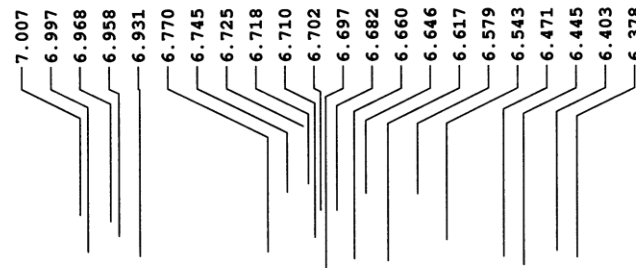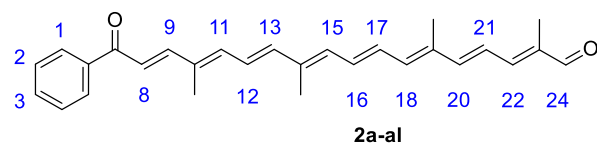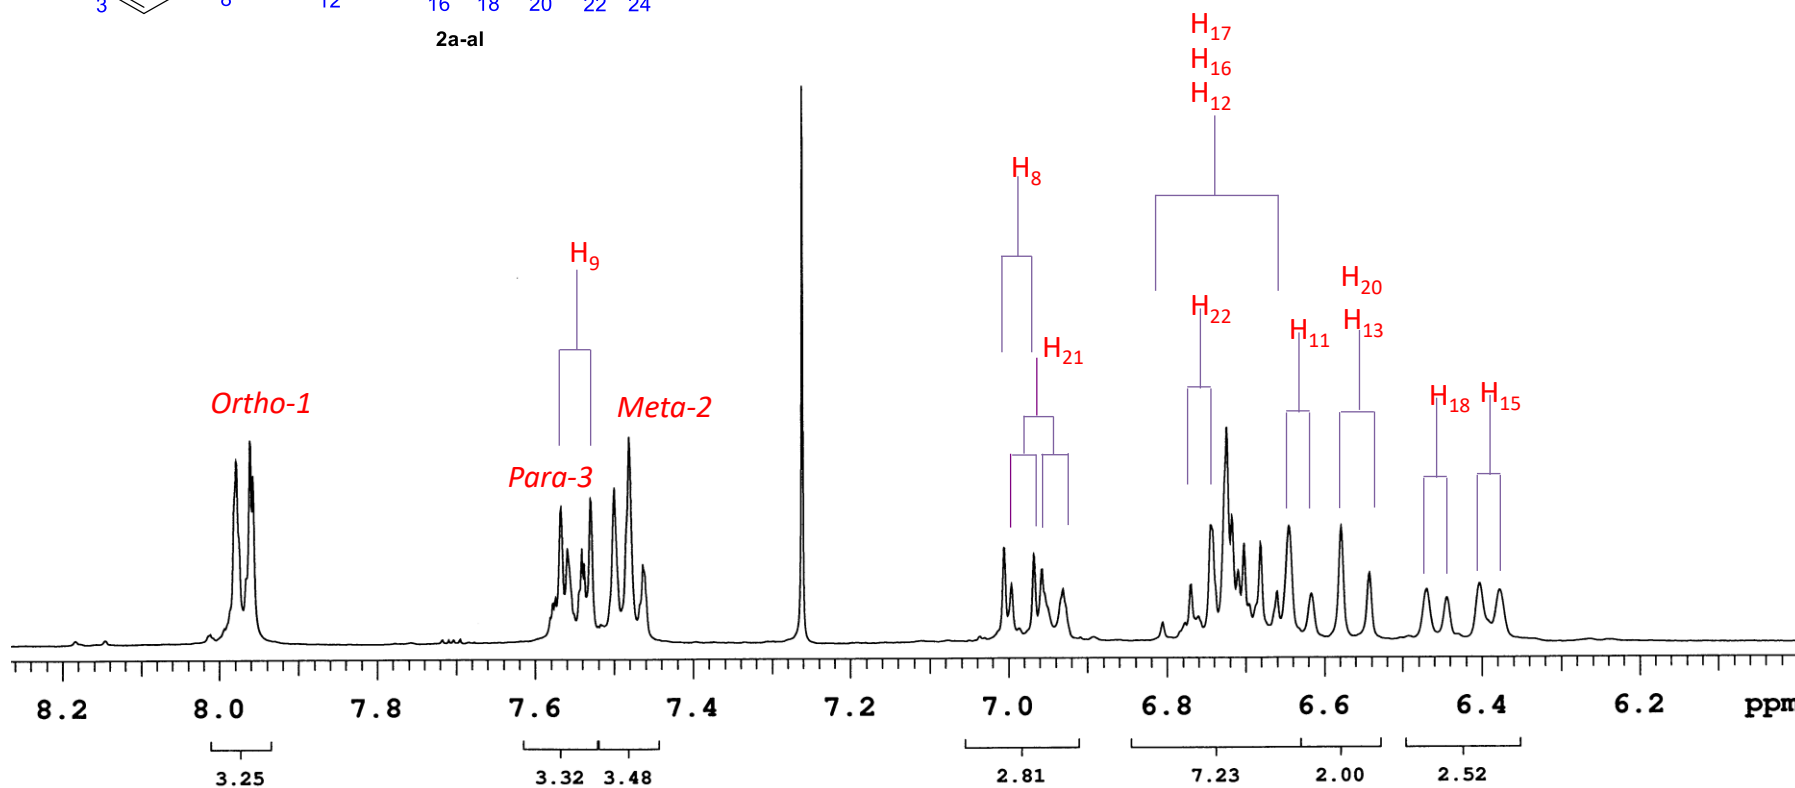

SGS-1421-11re

Sample Name **SGS-1421-11re**  
Date collected **2021-11-17**

Pulse sequence **CARBON**  
Solvent **cdcl3**

Temperature **25**  
Spectrometer **Agilent-NMR.chem.com-vnmr400**

Study owner **vnmr1**  
Operator **vnmr1**

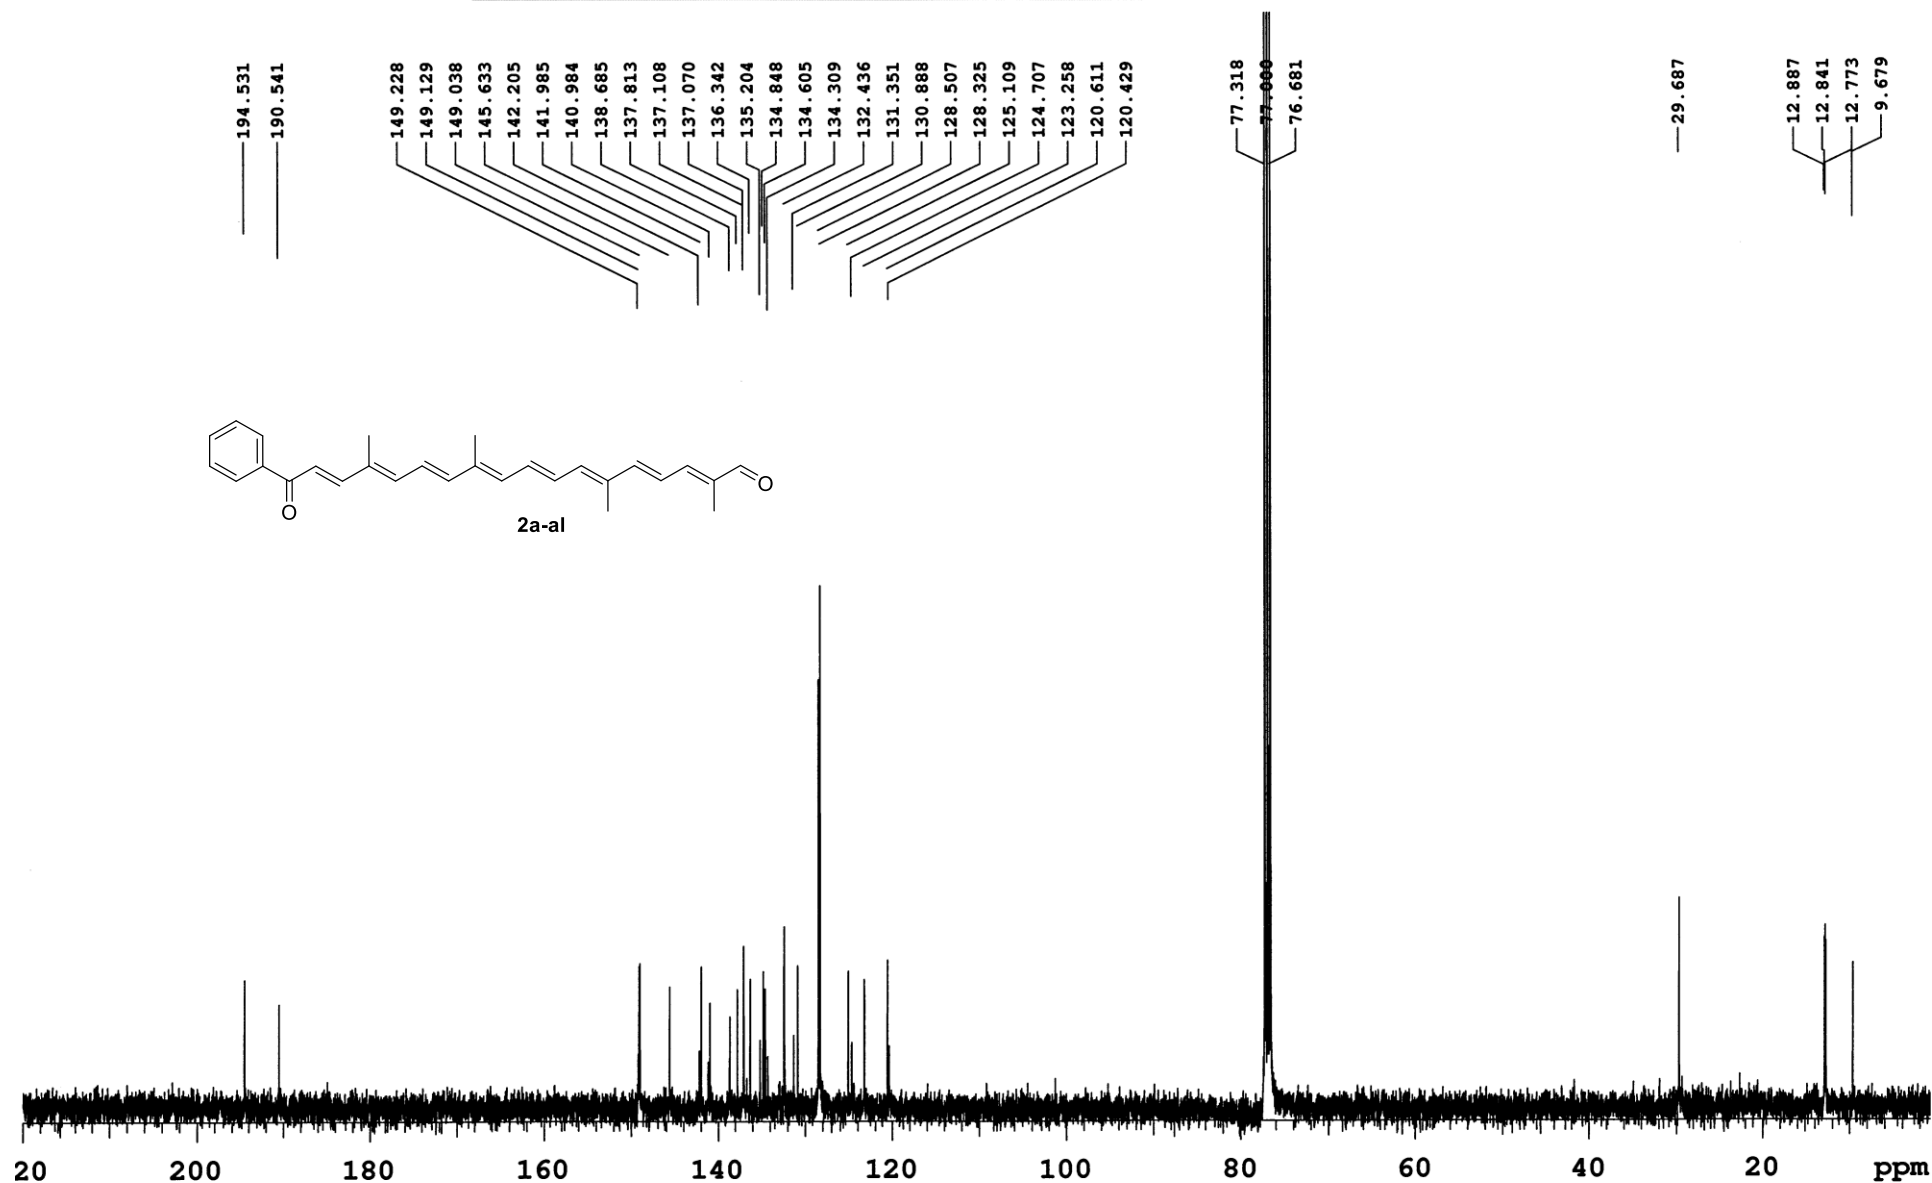

SGS-1557-3re

Sample Name **SGS-1557-3re**  
Date collected **2021-09-07**

Pulse sequence **PROTON**  
Solvent **cdcl3**

Temperature **25**  
Spectrometer **Agilent-NMR.chem.com-vnmrs400**

Study owner **vnmr1**  
Operator **vnmr1**

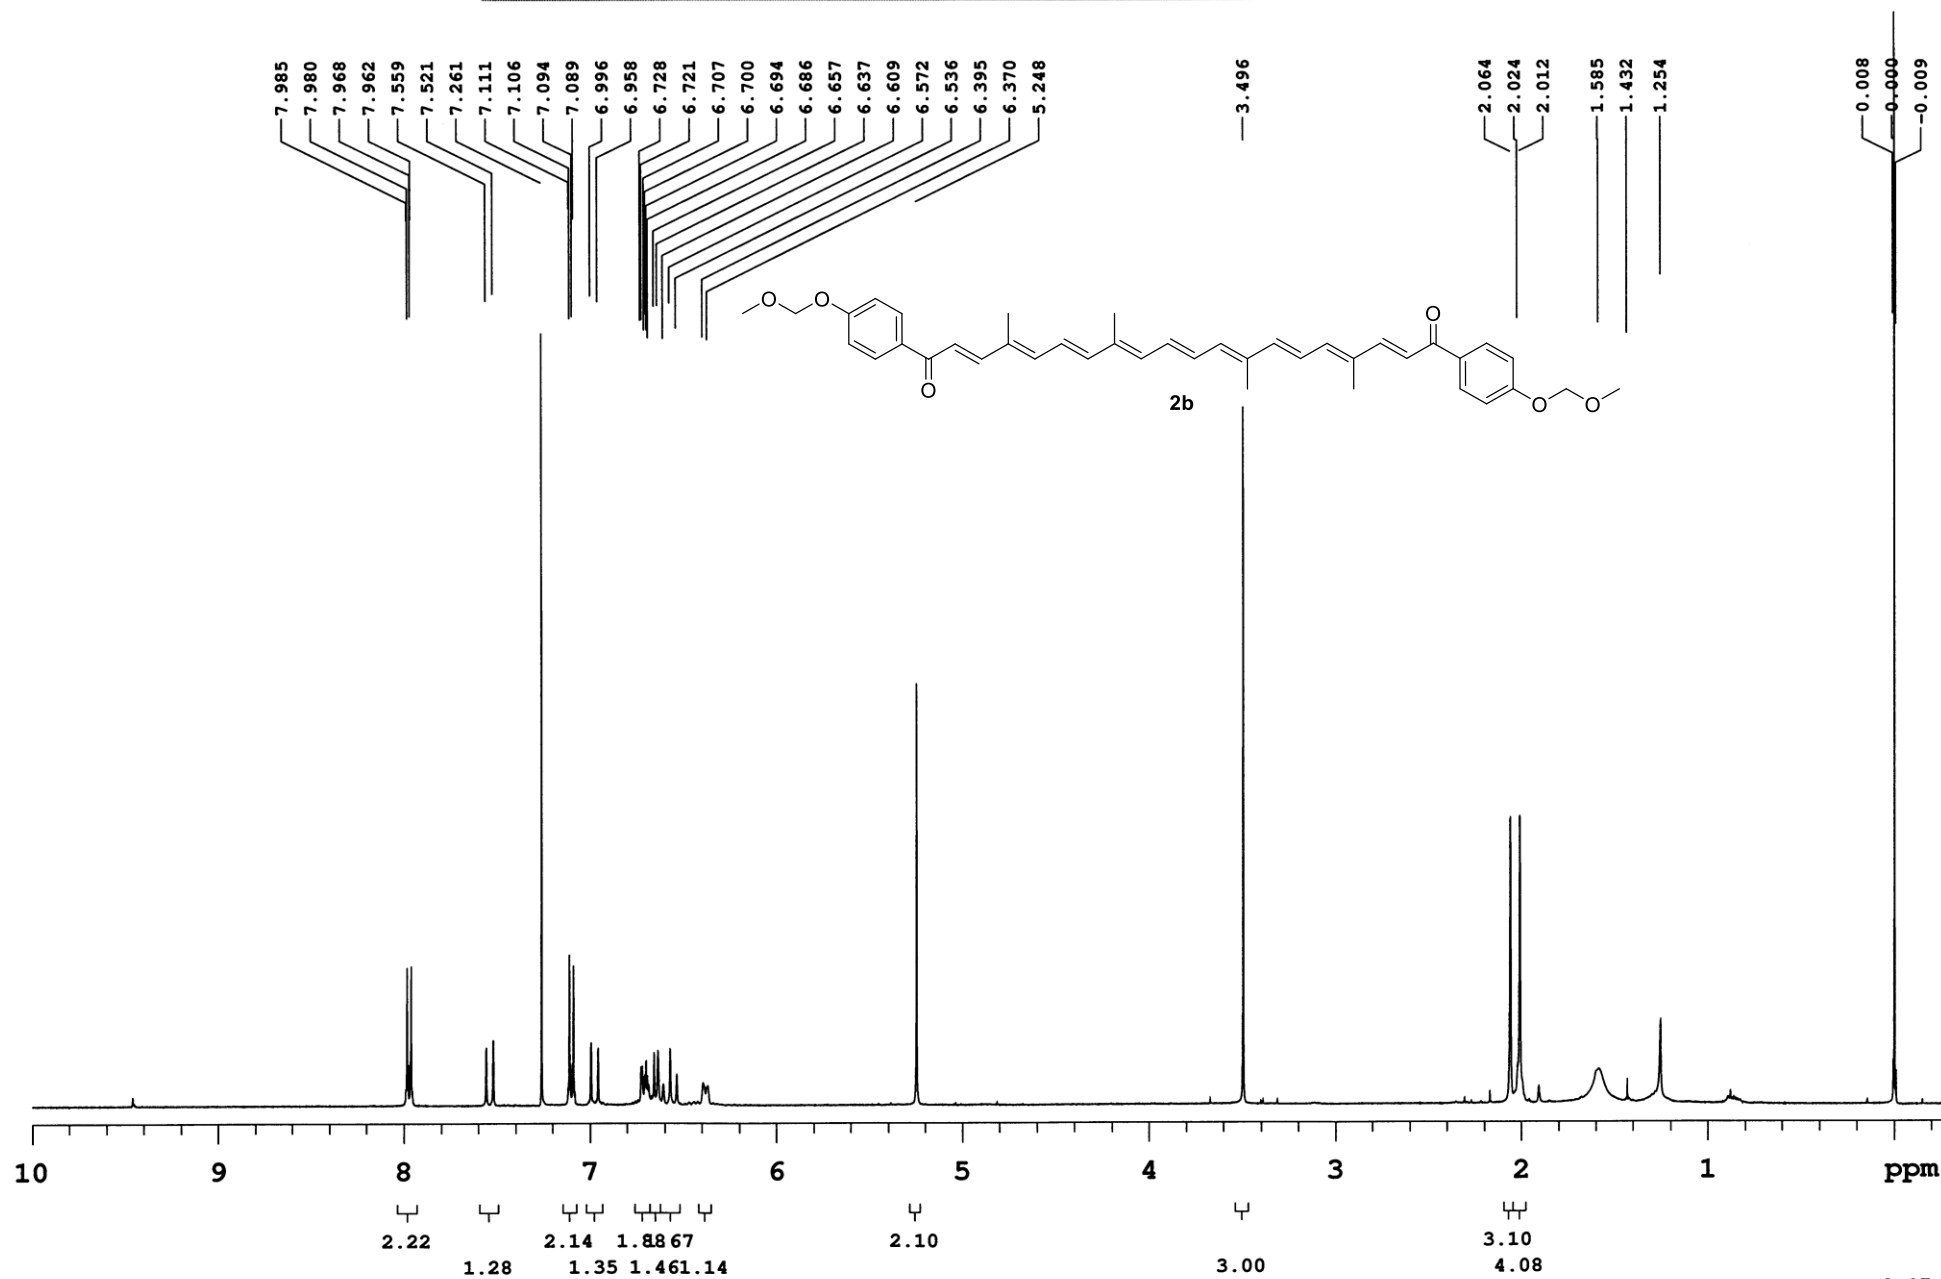

SGS-1557-3re

Sample Name **SGS-1557-3re**  
Date collected **2021-09-07**

Pulse sequence **PROTON**  
Solvent **cdcl3**

Temperature **25**  
Spectrometer **Agilent-NMR.chem.com-vnmr400**

Study owner **vnmr1**  
Operator **vnmr1**

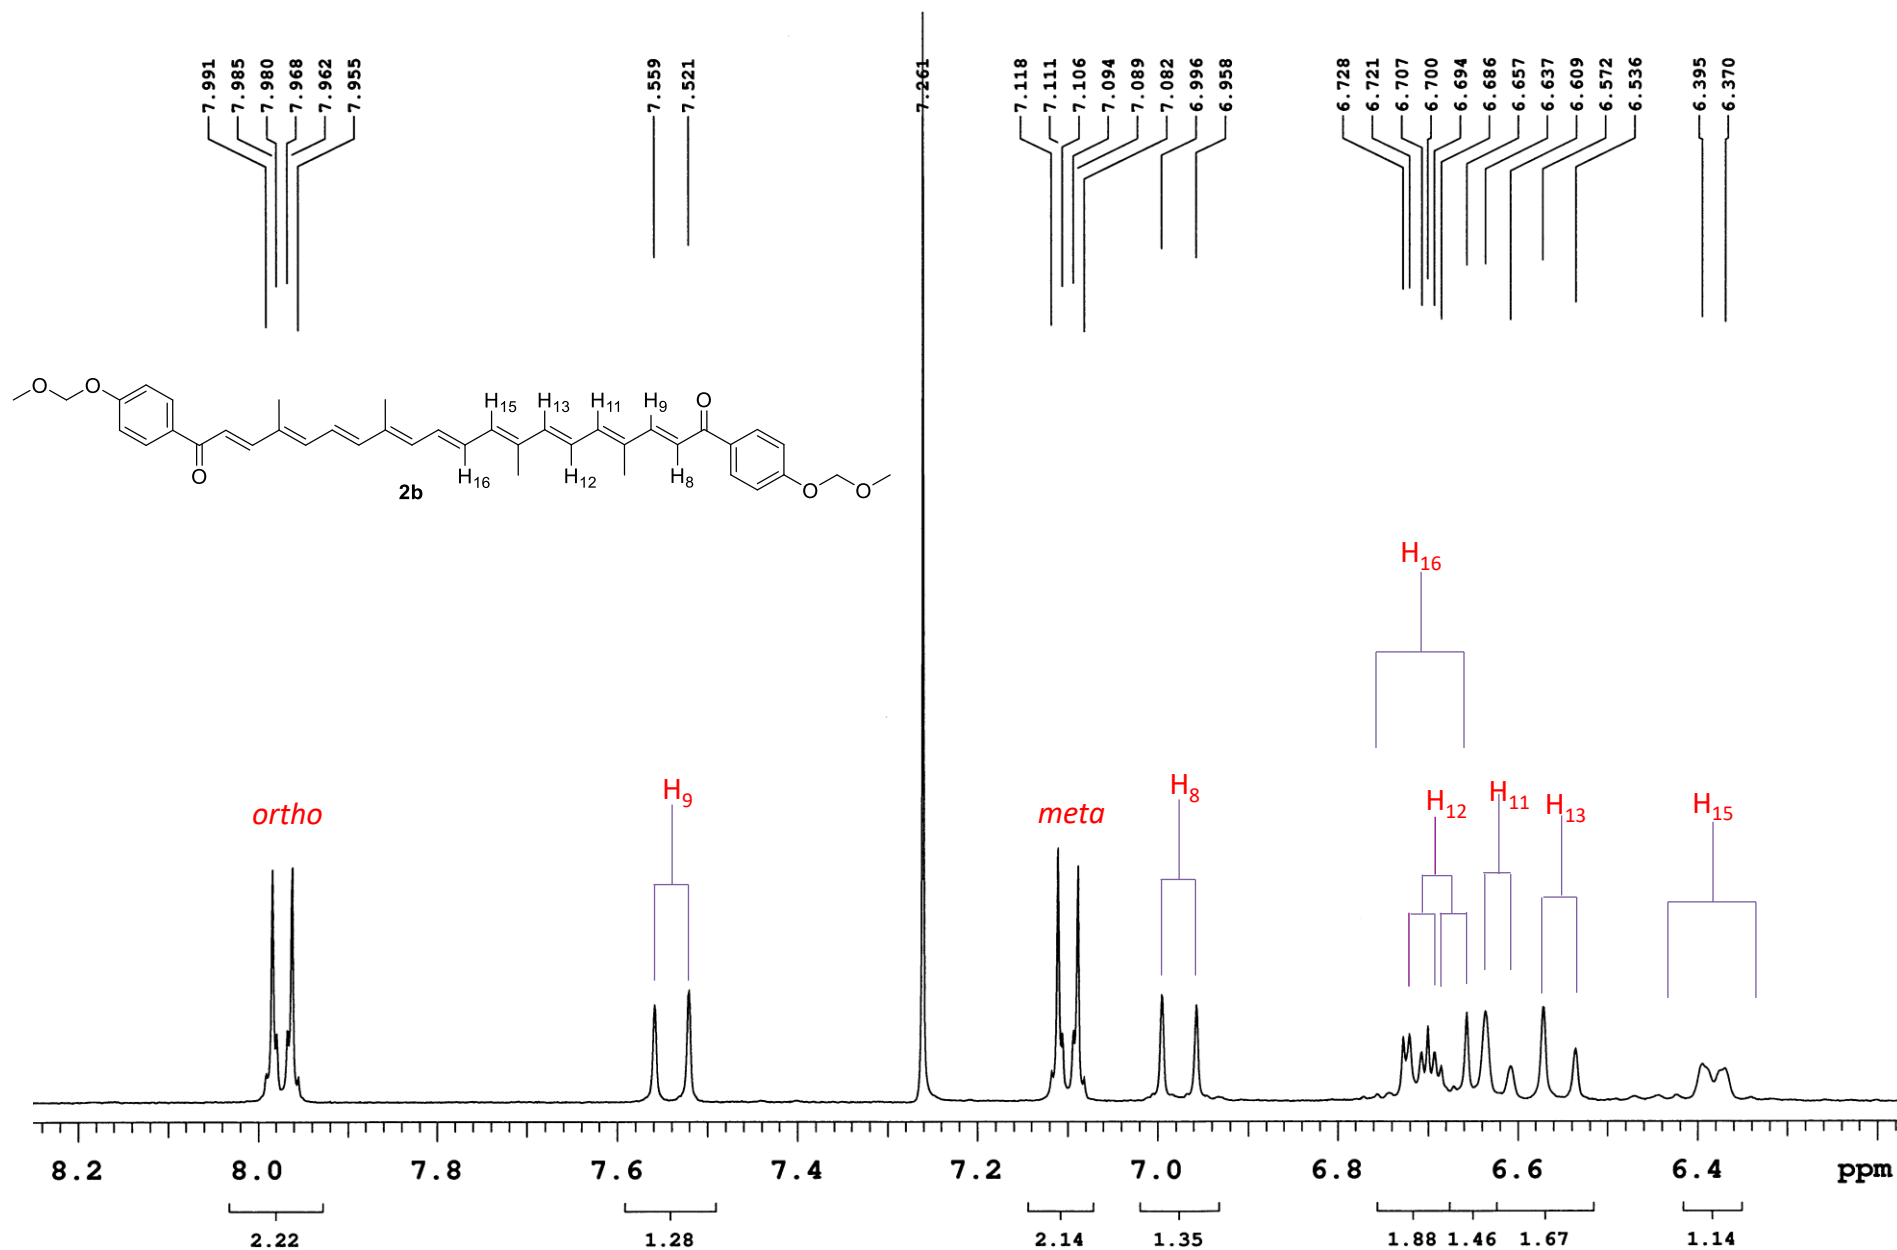



SGS-1557-3re-13C

Sample Name **SGS-1557-3re-13C**  
Date collected **2021-09-09**

Pulse sequence **CARBON**  
Solvent **cdcl3**

Temperature **25**  
Spectrometer **Agilent-NMR.chem.com-vnmrs400**  
Study owner **vnmr1**  
Operator **vnmr1**

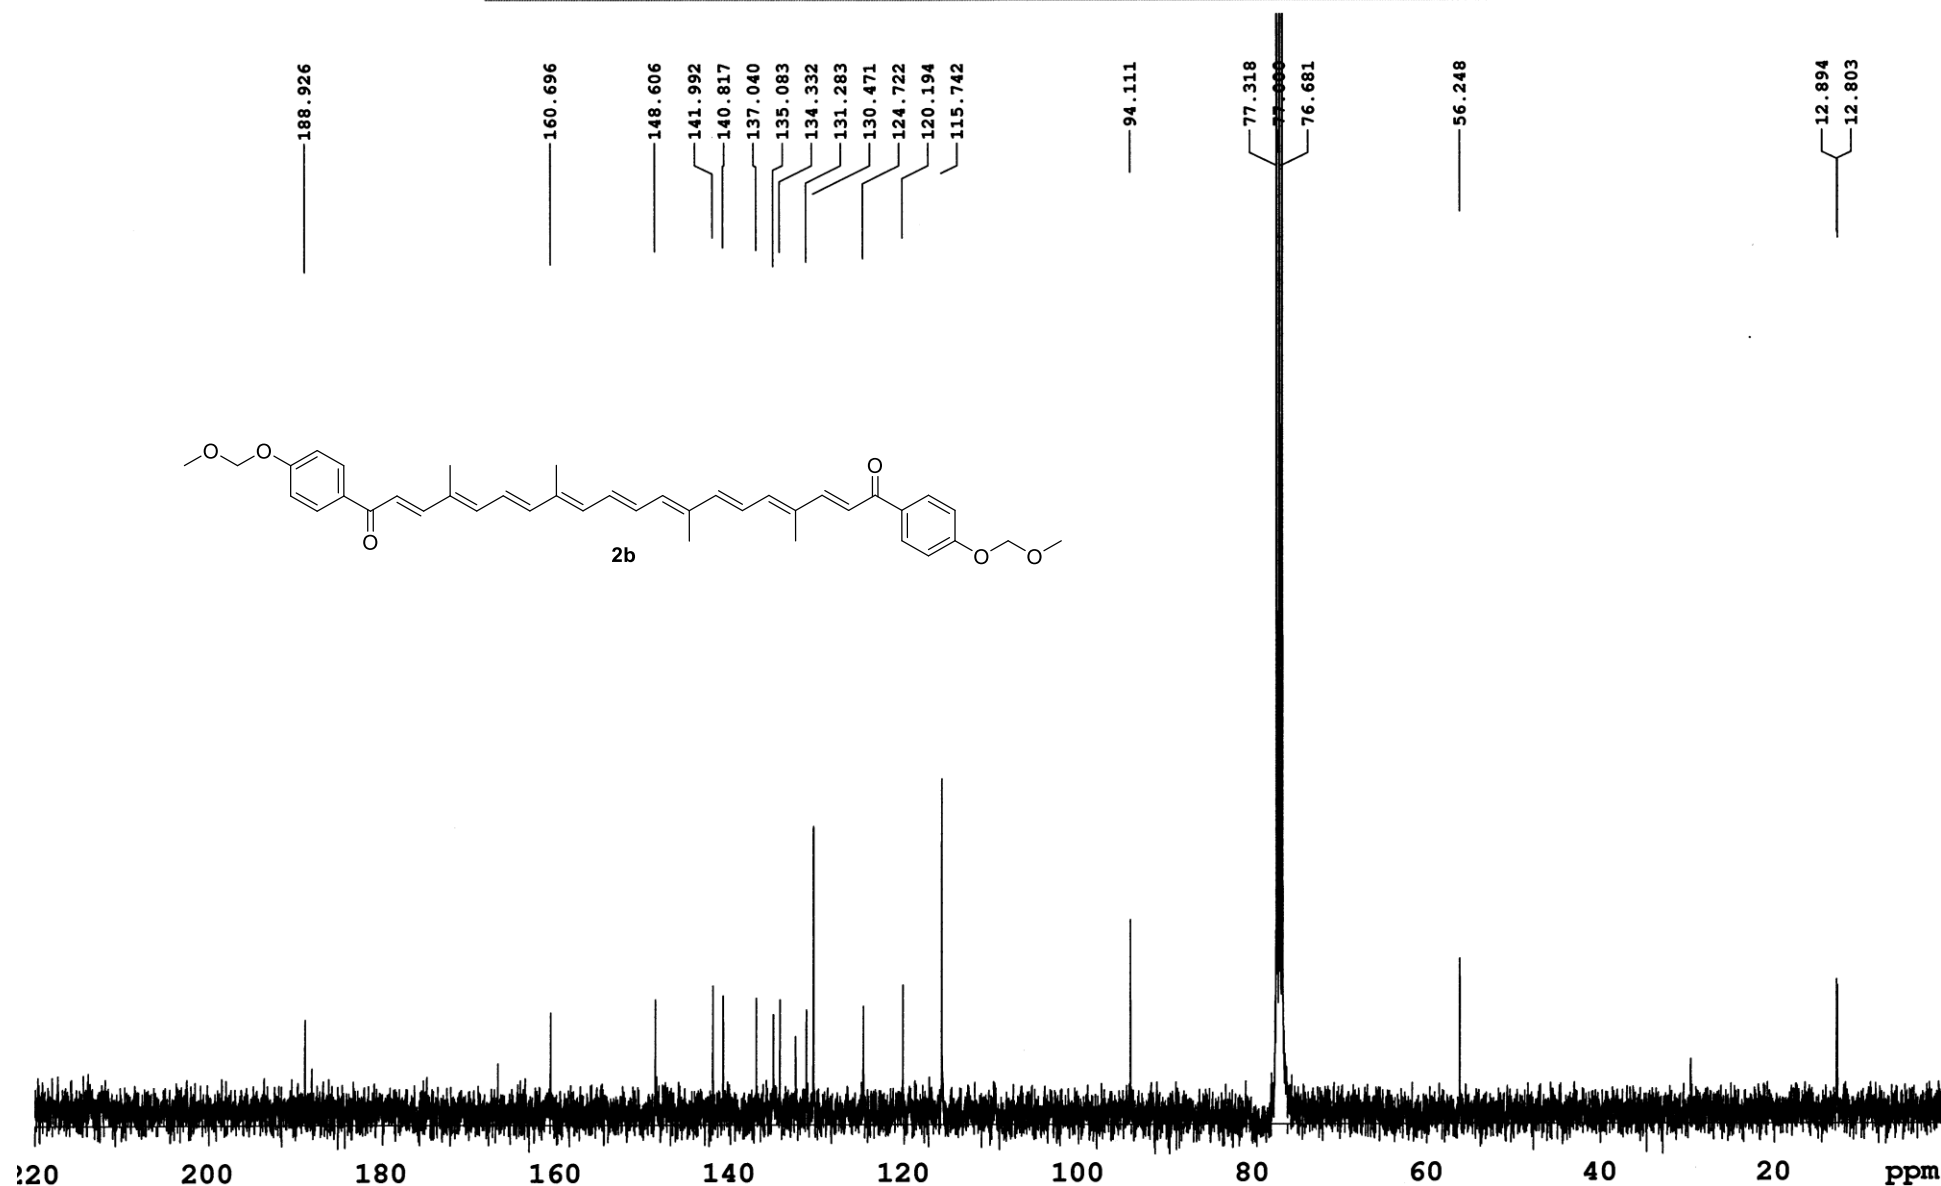

SGS-1557-3re-13C

Sample Name **SGS-1557-3re-13C**  
Date collected **2021-09-09**

Pulse sequence **CARBON**  
Solvent **cdcl3**

Temperature **25**  
Spectrometer **Agilent-NMR.chem.com-vnmrs400**

Study owner **vnmr1**  
Operator **vnmr1**

148.606  
141.992  
140.817  
137.040  
135.083  
134.332  
132.527  
131.283  
130.471  
124.722  
120.194  
115.742

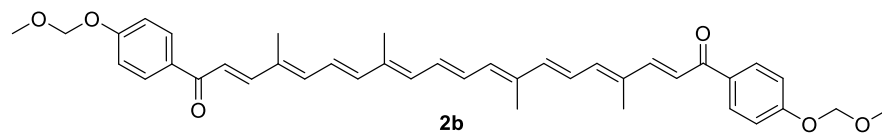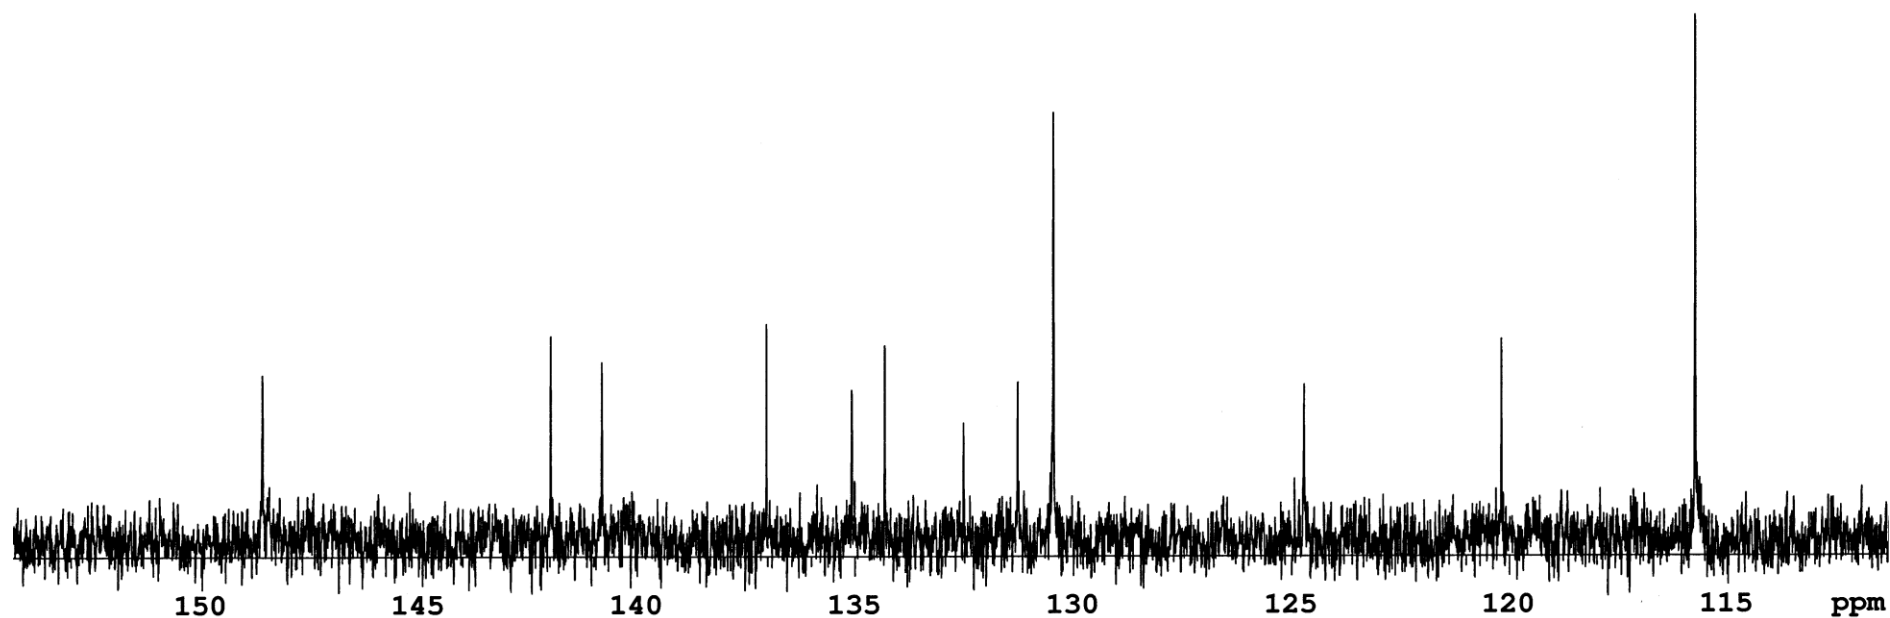

SGS-1521-EA2

Sample Name **SGS-1521-EA2**  
Date collected **2021-09-01**

Pulse sequence **PROTON**  
Solvent **cdcl3**

Temperature **25**  
Spectrometer **Agilent-NMR.chem.com-vnmrs400**

Study owner **vnmr1**  
Operator **vnmr1**

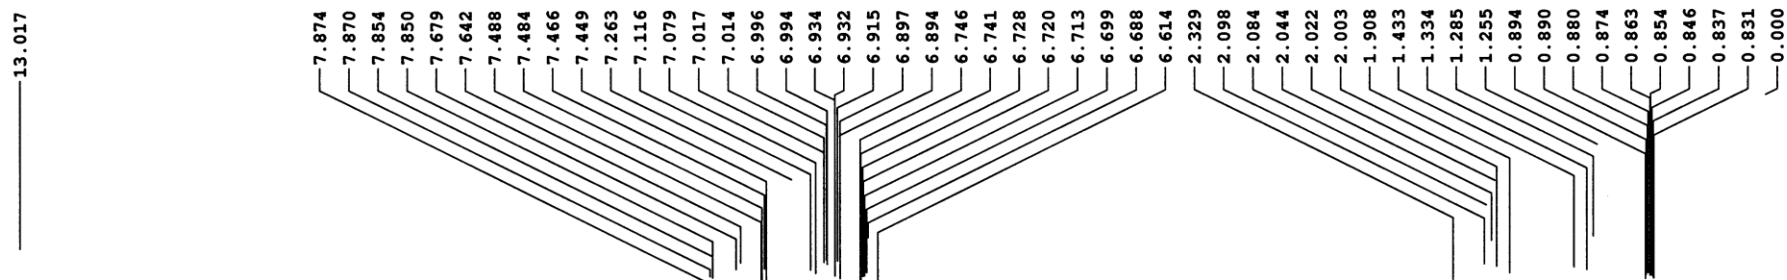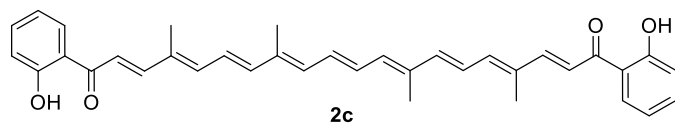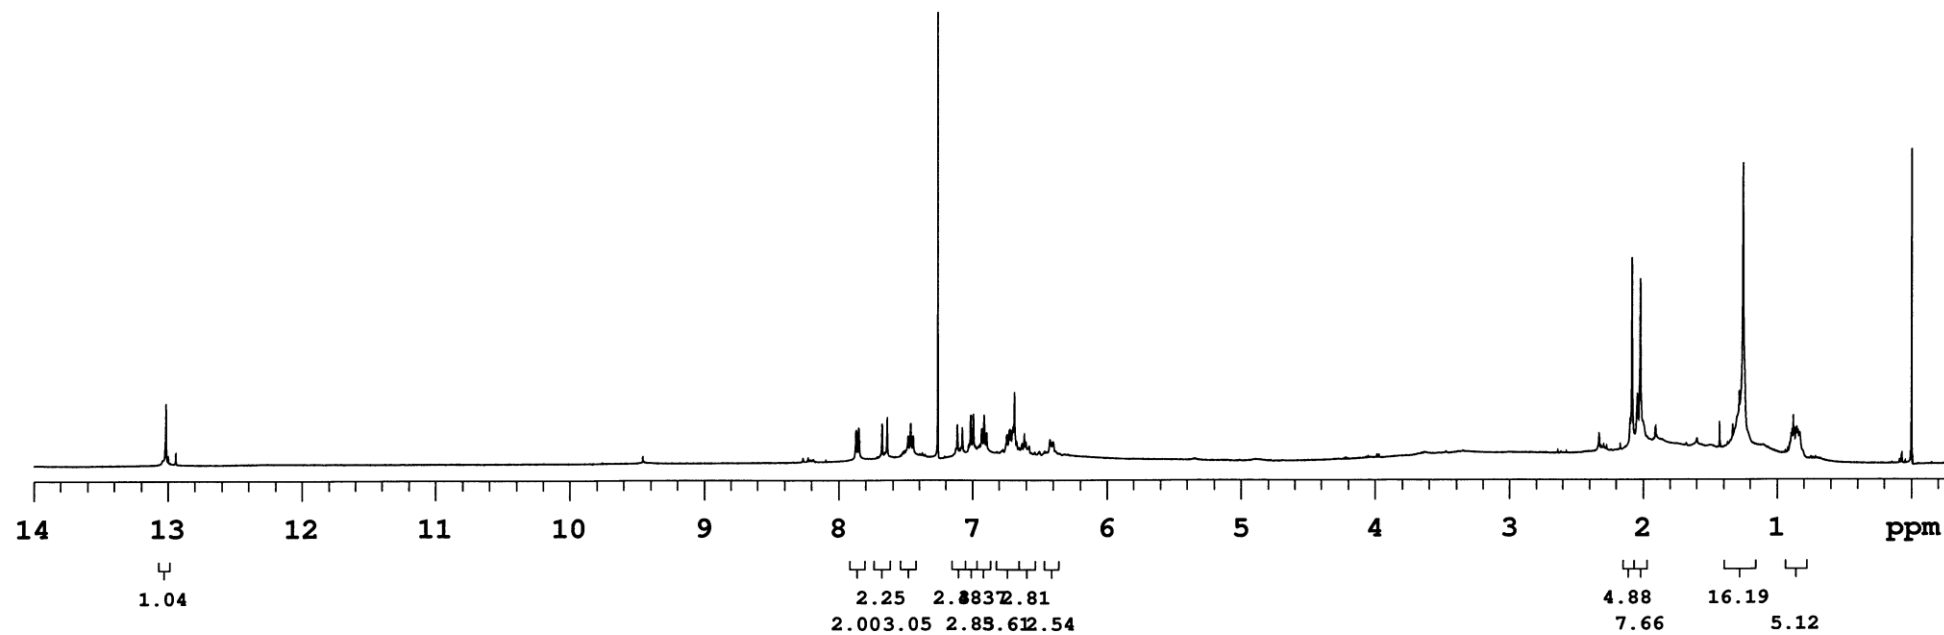

SGS-1521-EA2

Sample Name **SGS-1521-EA2**  
Date collected **2021-09-01**Pulse sequence **PROTON**  
Solvent **cdcl3**Temperature **25**  
Spectrometer **Agilent-NMR.chem.com-vnmr400**  
Study owner **vnmr1**  
Operator **vnmr1**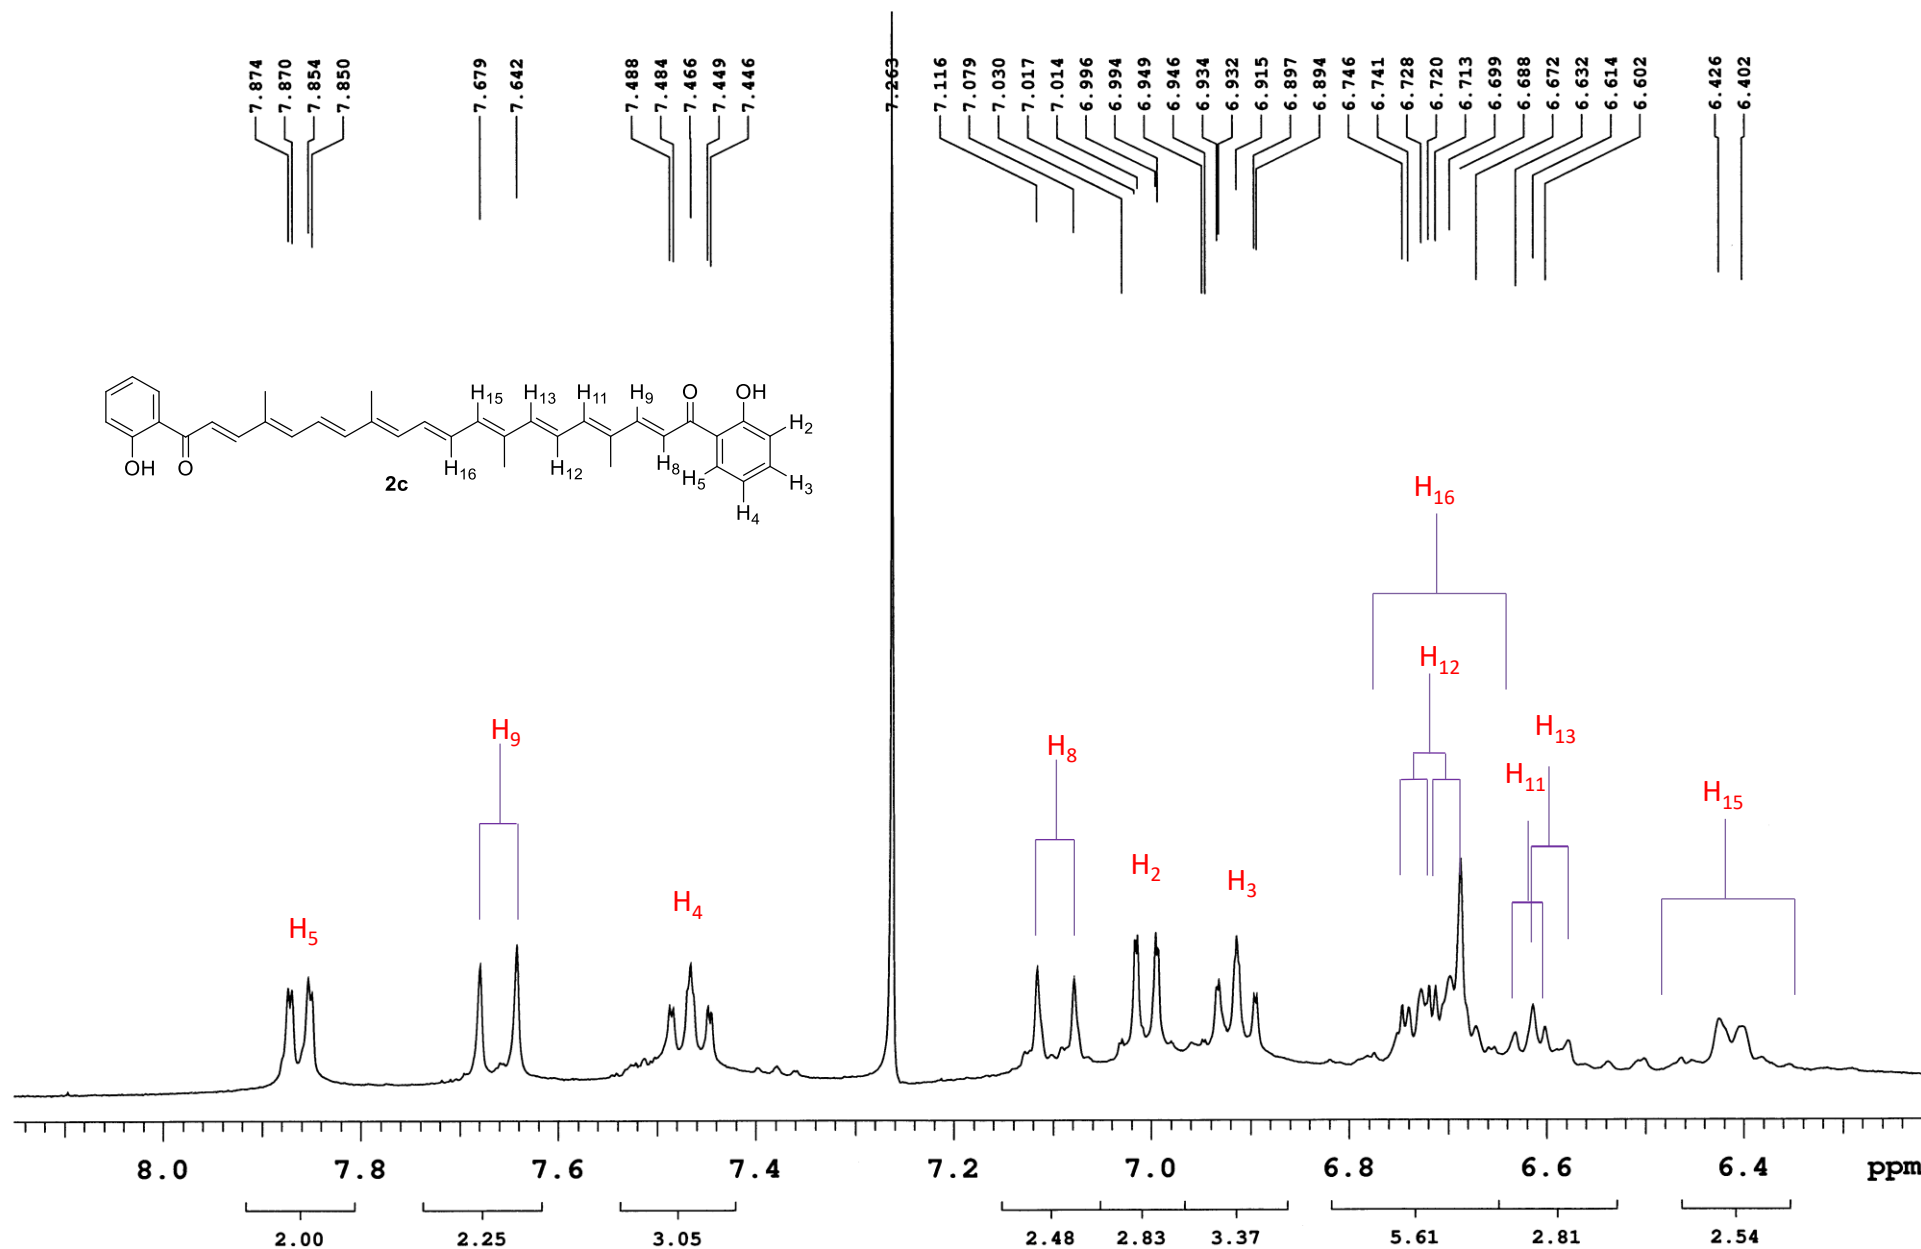

SGS-1597-EA1

Sample Name **SGS-1597-EA1**  
Date collected **2021-10-05**

Pulse sequence **PROTON**  
Solvent **dms**

Temperature **25**  
Spectrometer **Agilent-NMR.chem.com-vnmr400**  
Study owner **vnmr1**  
Operator **vnmr1**

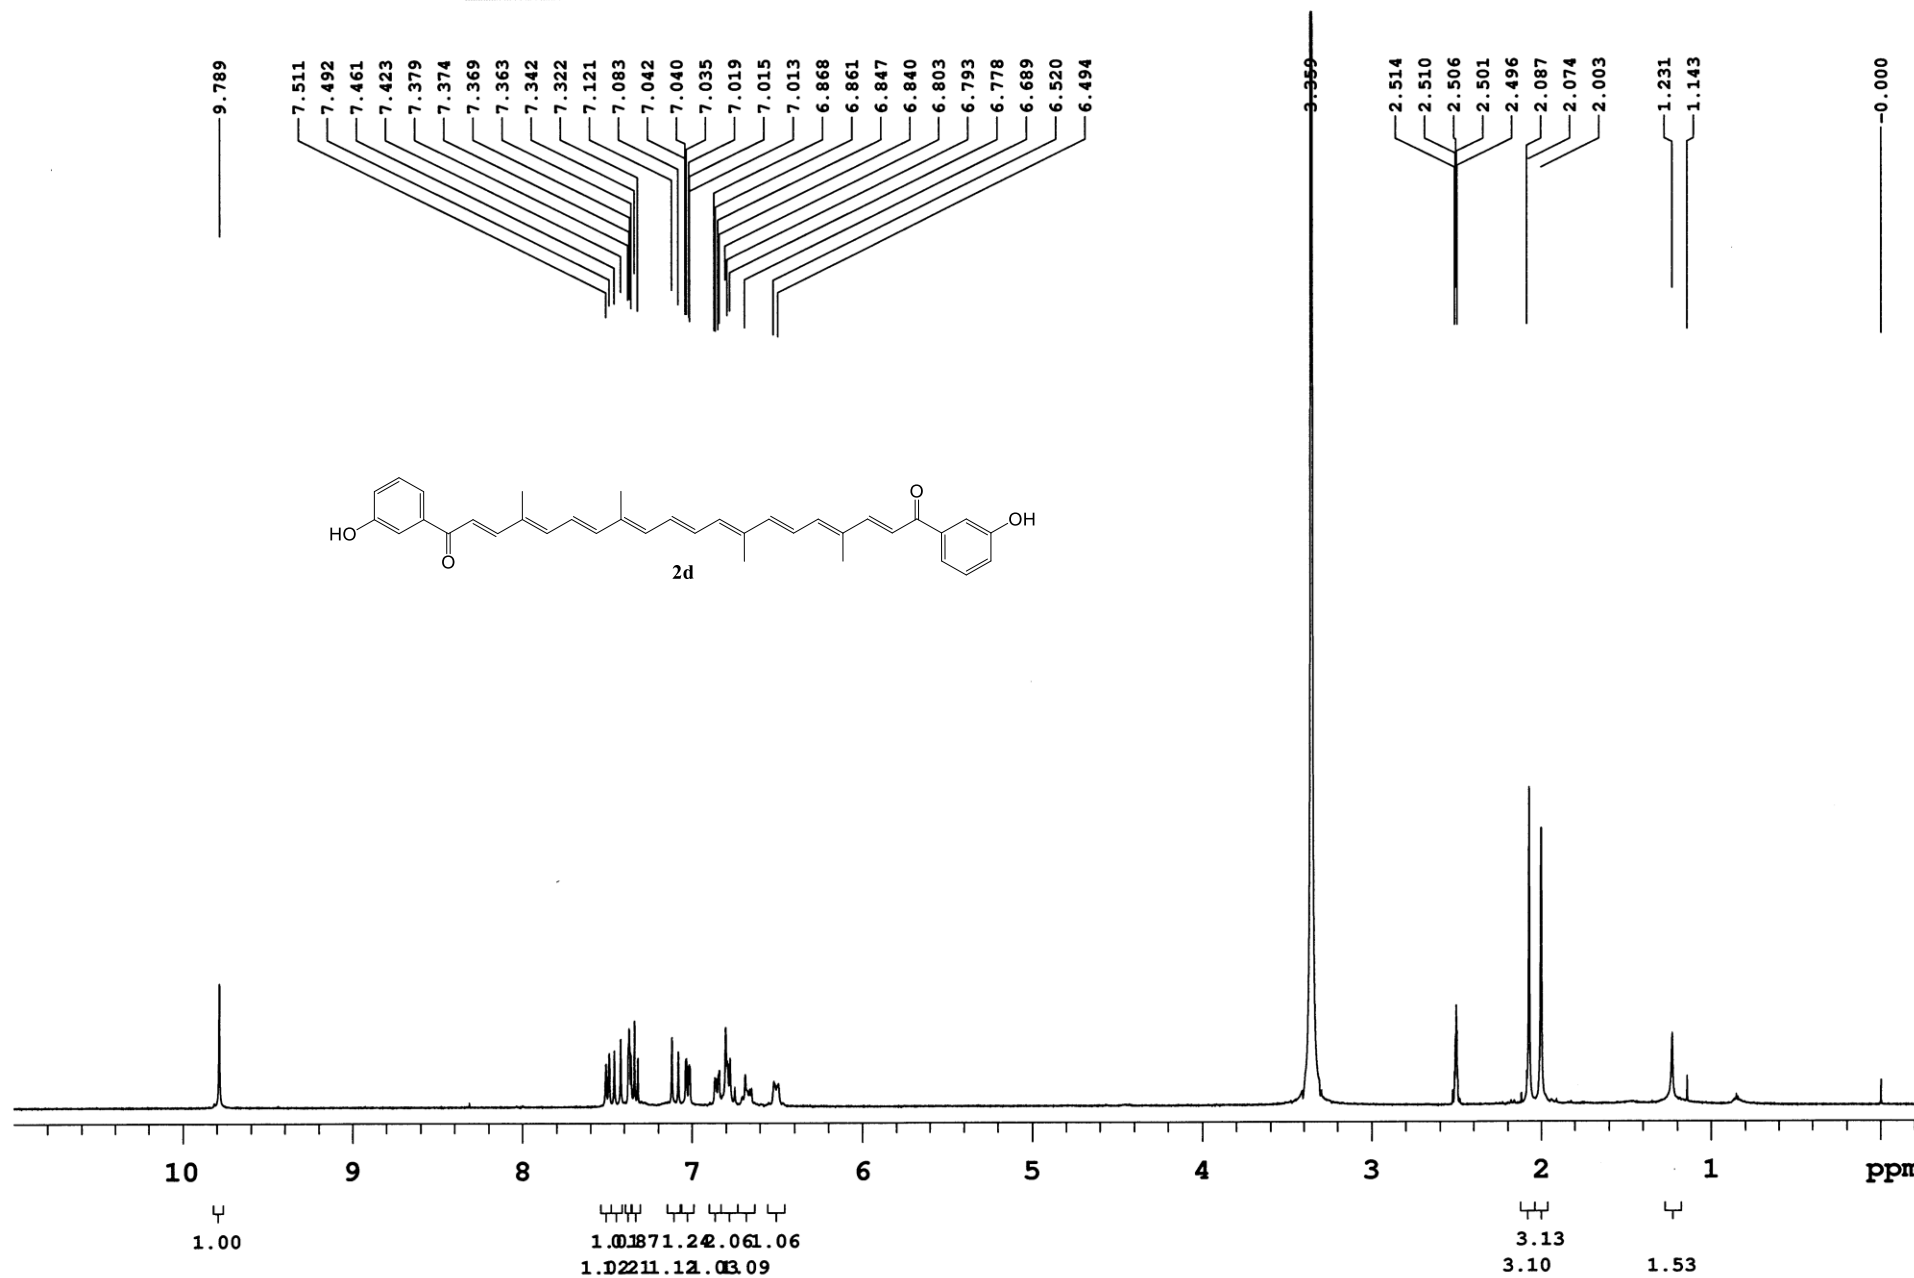

SGS-1597-EA1

Sample Name **SGS-1597-EA1**  
Date collected **2021-10-05**Pulse sequence **PROTON**  
Solvent **dms**Temperature **25**  
Spectrometer **Agilent-NMR.chem.com-vnmr400**  
Study owner **vnmr1**  
Operator **vnmr1**7.511  
7.492  
7.461  
7.423  
7.379  
7.374  
7.369  
7.363  
7.342  
7.3227.121  
7.083  
7.042  
7.040  
7.035  
7.019  
7.015  
7.0136.868  
6.861  
6.847  
6.840  
6.803  
6.793  
6.778  
6.749  
6.689  
6.663  
6.6526.520  
6.494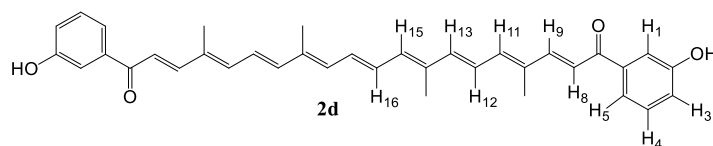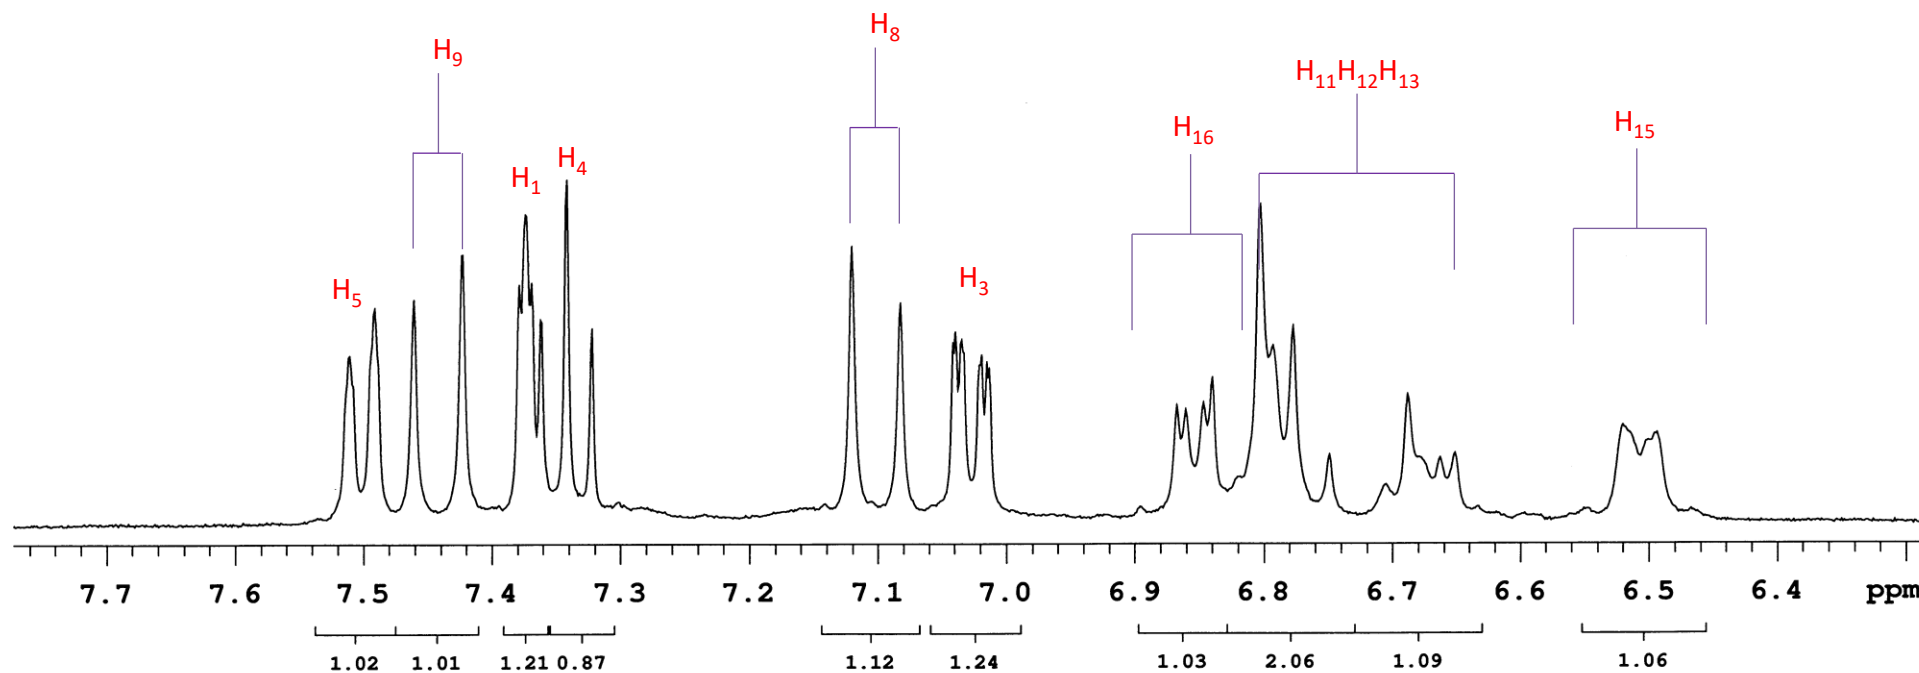

| Parameter              | Value                                                                   |
|------------------------|-------------------------------------------------------------------------|
| Data File Name         | F:/NMR/ 2110-koo-4-06/ SGS-1597-EA1_01/ SGS-1597-EA1_CARBO1_01.fid/ fid |
| Instrument             | vnmrs                                                                   |
| Solvent                | dmso                                                                    |
| Probe                  | 5mm_ATB                                                                 |
| Number of Scans        | 2000                                                                    |
| Acquisition Date       | 2021-10-06T01:45:21                                                     |
| Spectrometer Frequency | 100.60                                                                  |

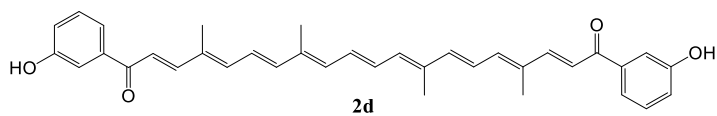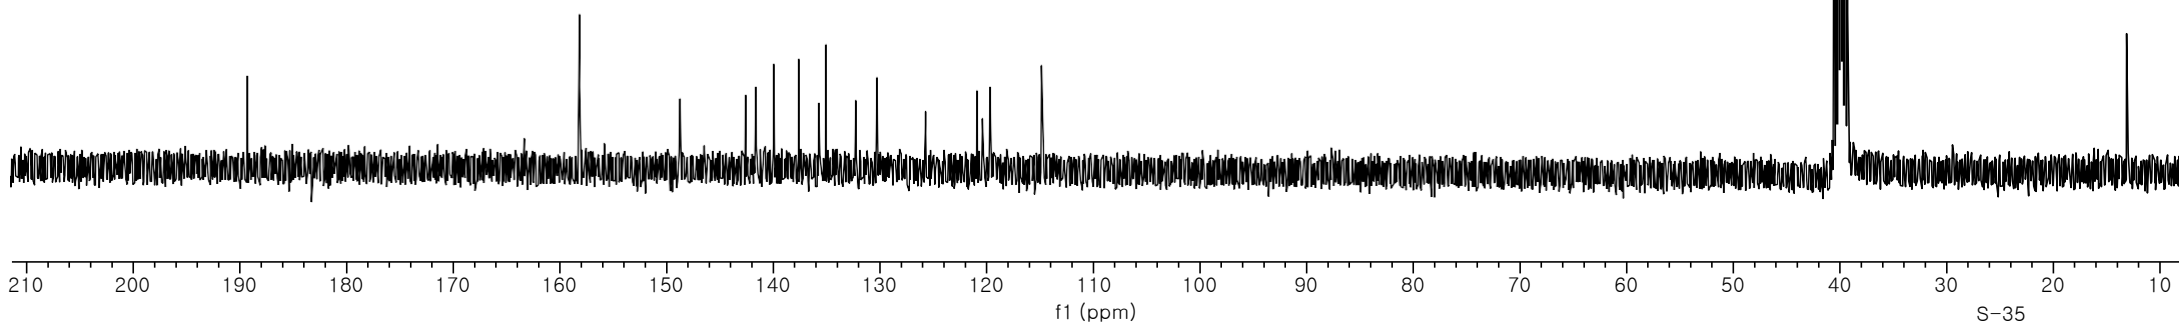

| Parameter              | Value                                                                   |
|------------------------|-------------------------------------------------------------------------|
| Data File Name         | F:/NMR/ 2110-koo-4-06/ SGS-1597-EA1_01/ SGS-1597-EA1_CARBON_01.fid/ fid |
| Instrument             | vnmrs                                                                   |
| Solvent                | dmso                                                                    |
| Probe                  | 5mm_ATB                                                                 |
| Number of Scans        | 2000                                                                    |
| Acquisition Date       | 2021-10-06T01:45:21                                                     |
| Spectrometer Frequency | 100.60                                                                  |

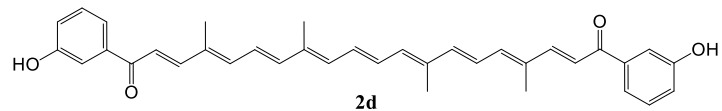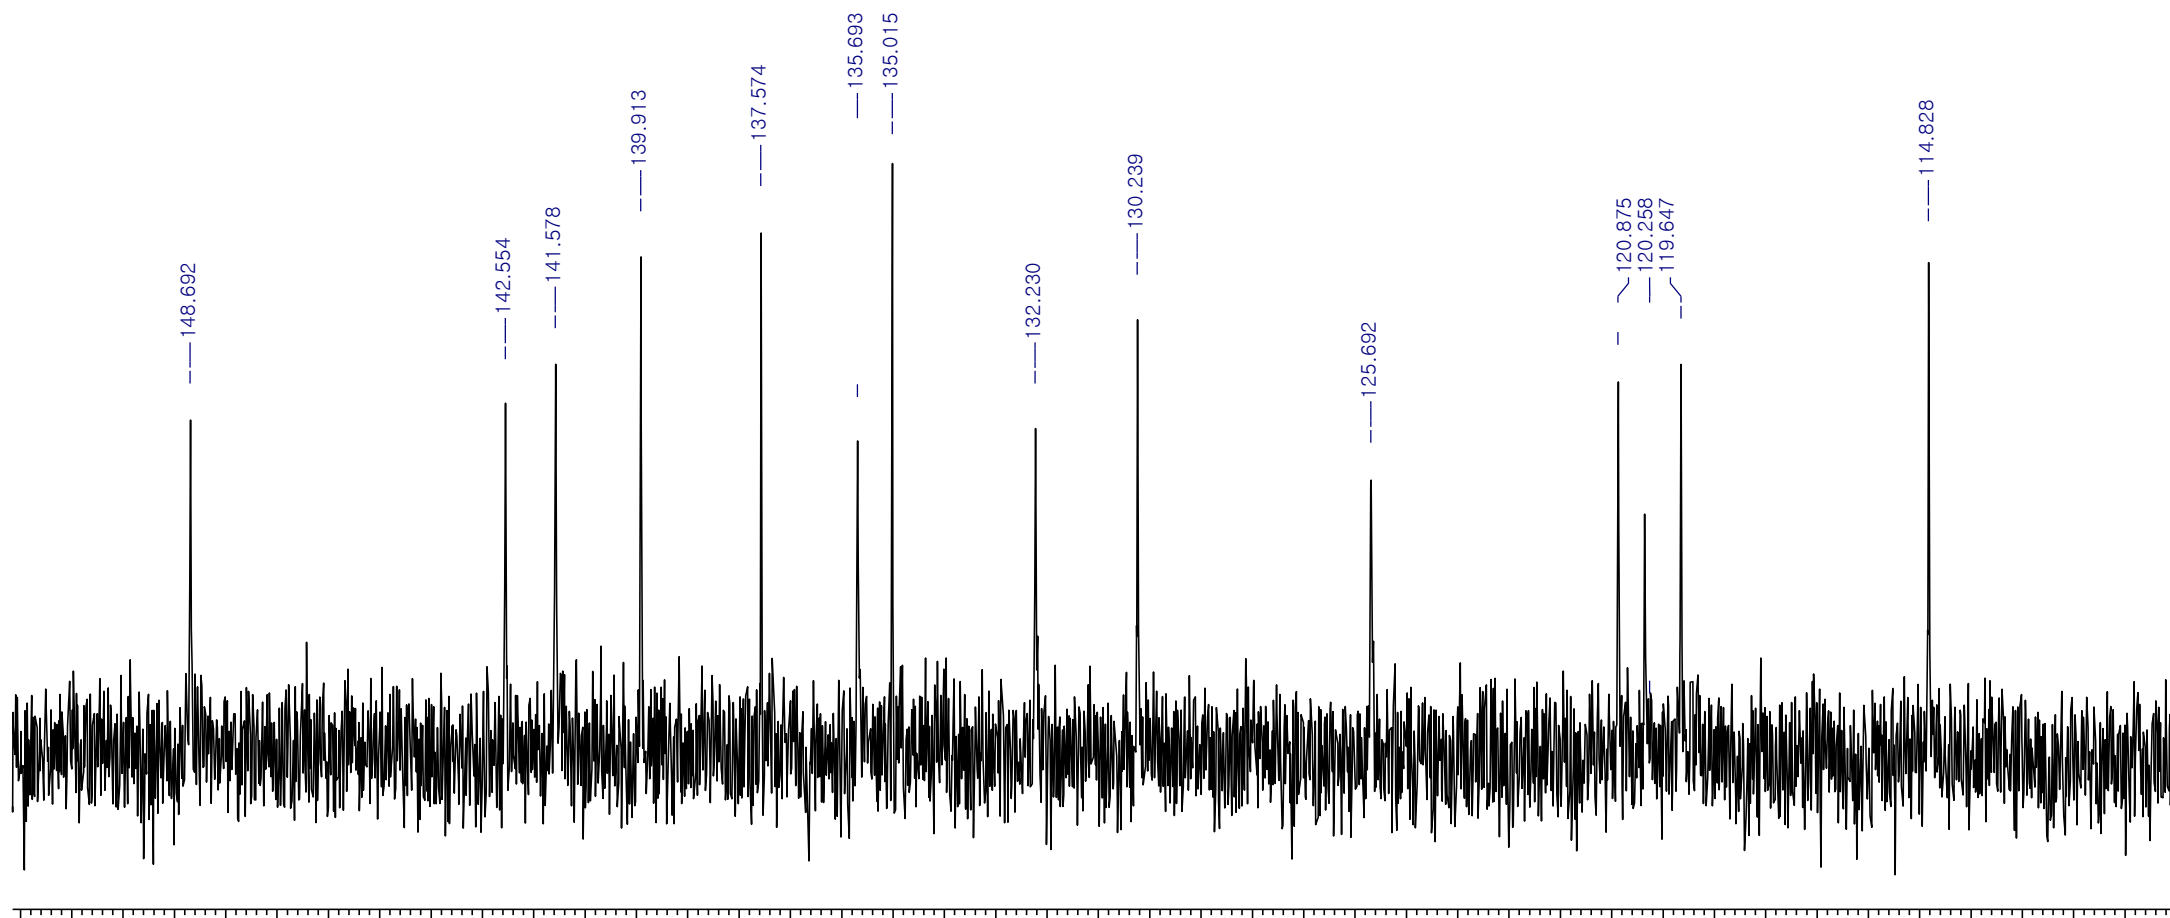



SGS-2022-2re-1

Sample Name **SGS-2022-2re-1**  
Date collected **2022-01-04**

Pulse sequence **PROTON**  
Solvent **dms**

Temperature **25**  
Spectrometer **Agilent-NMR.chem.com-vnmrs400**  
Study owner **vnmr1**  
Operator **vnmr1**

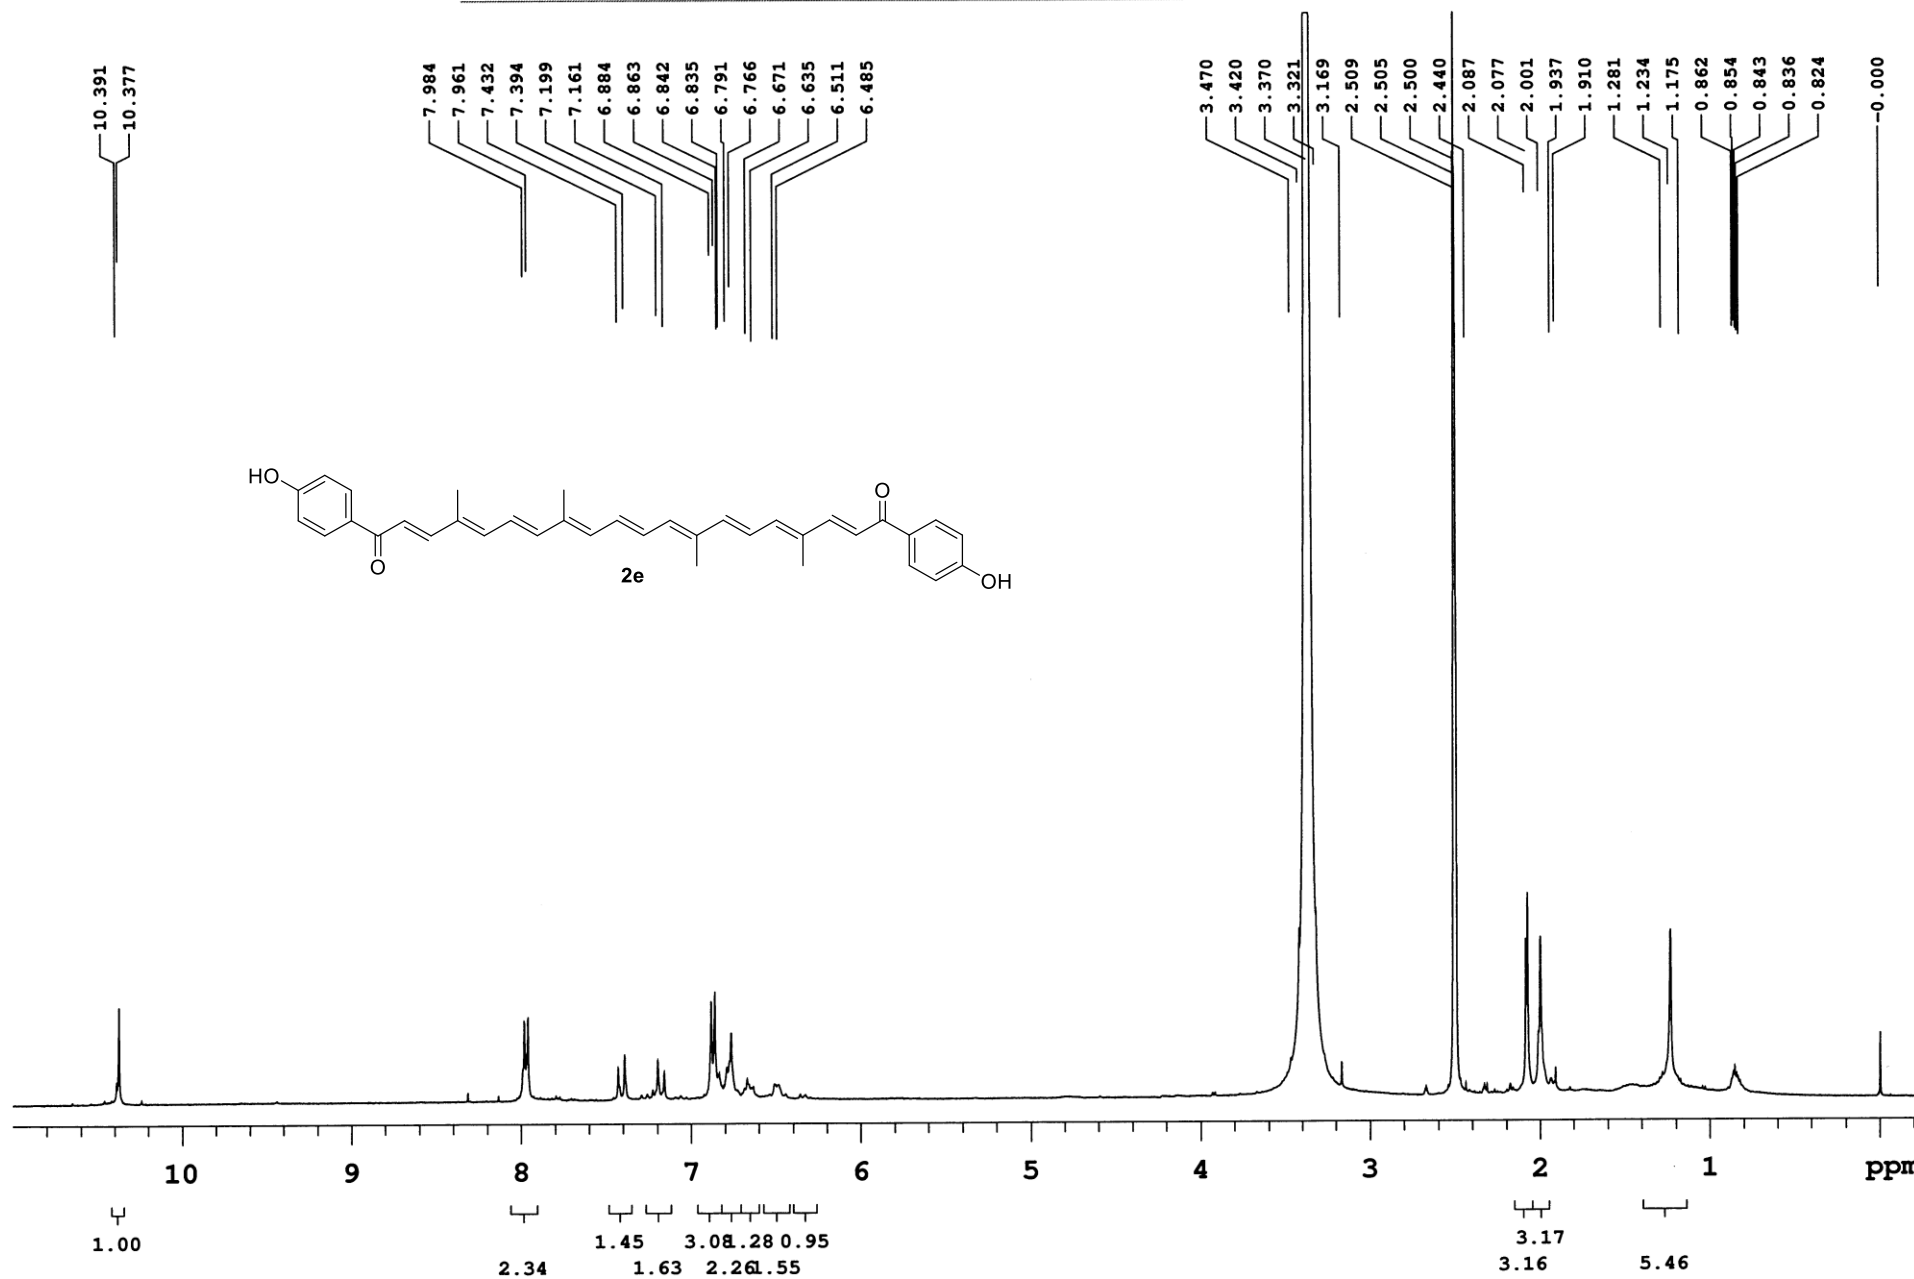

SGS-2022-2re-1

Sample Name **SGS-2022-2re-1**  
Date collected **2022-01-04**

Pulse sequence **PROTON**  
Solvent **dms**

Temperature **25**  
Spectrometer **Agilent-NMR.chem.com-vnmrs400**  
Study owner **vnmr1**  
Operator **vnmr1**

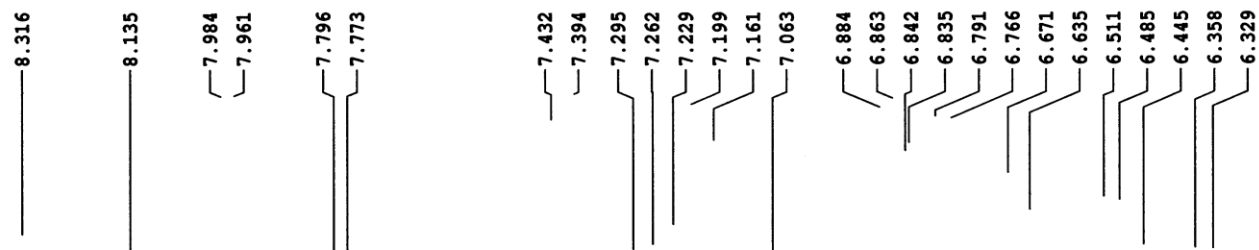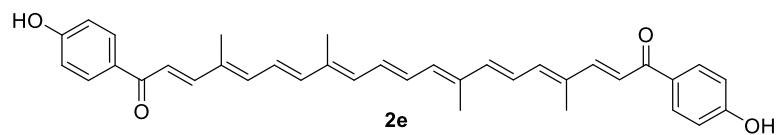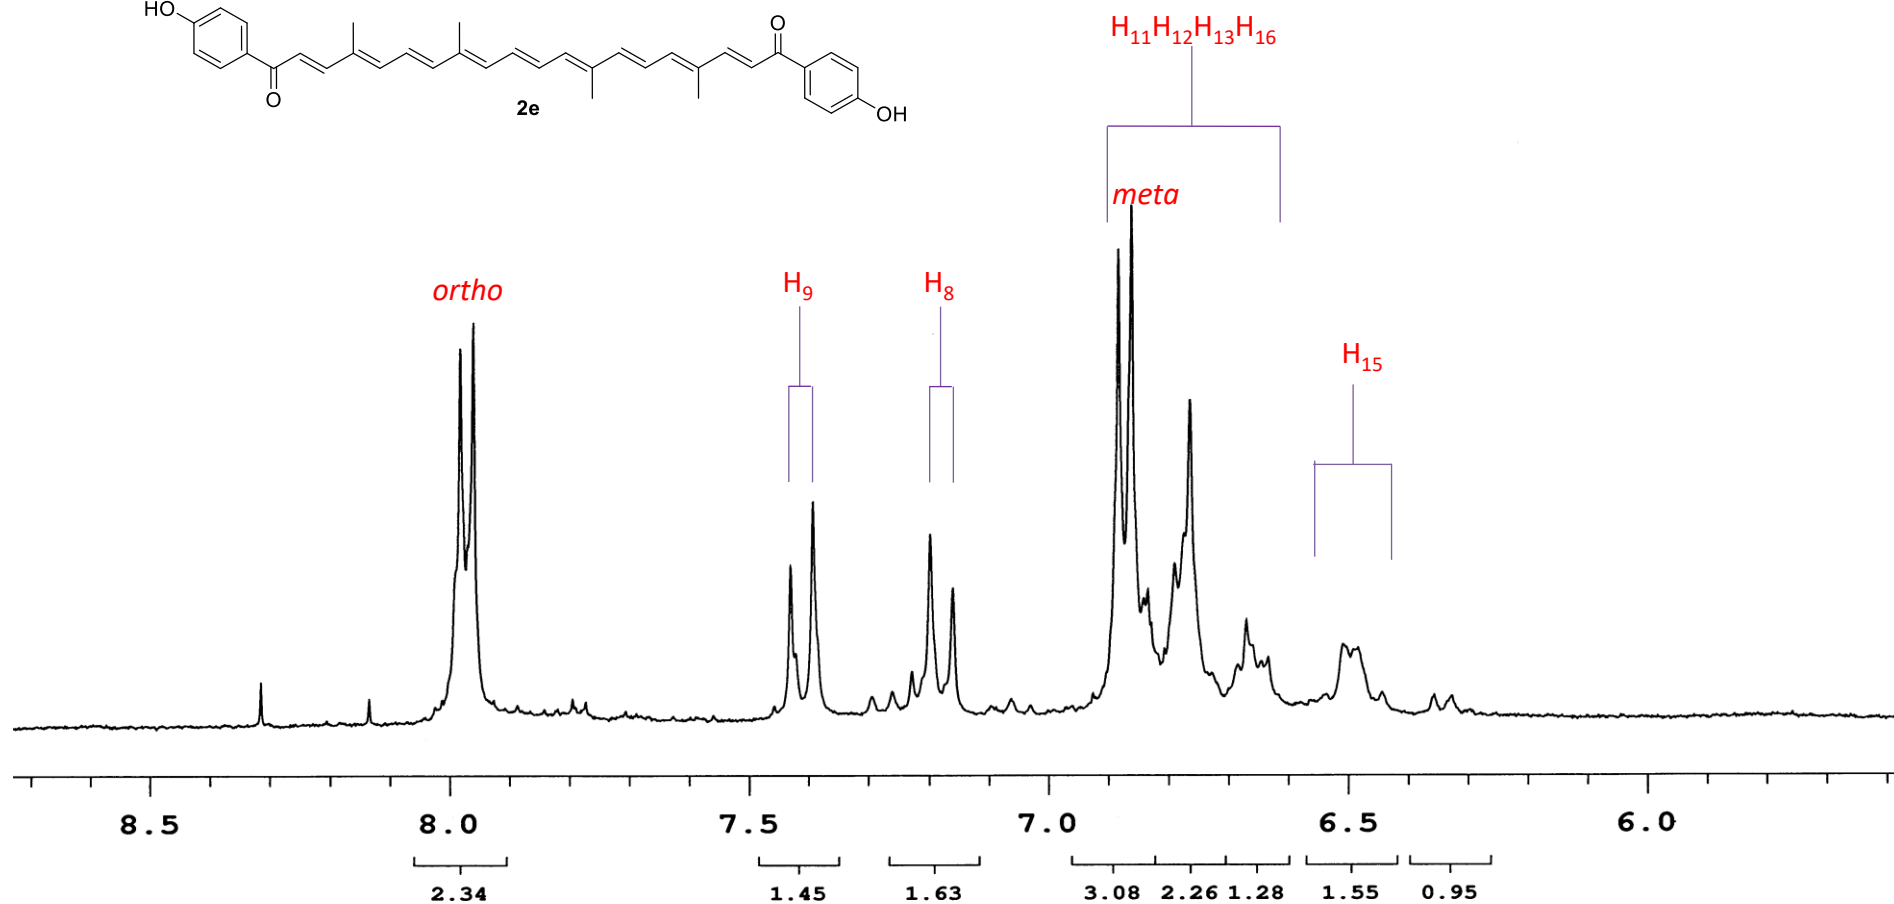

SGS-1547-1

Sample Name **SGS-1547-1**  
Date collected **2021-08-31**Pulse sequence **PROTON**  
Solvent **cdcl3**Temperature **25**  
Spectrometer **Agilent-NMR.chem.com-vnmrs400**Study owner **vnmr1**  
Operator **vnmr1**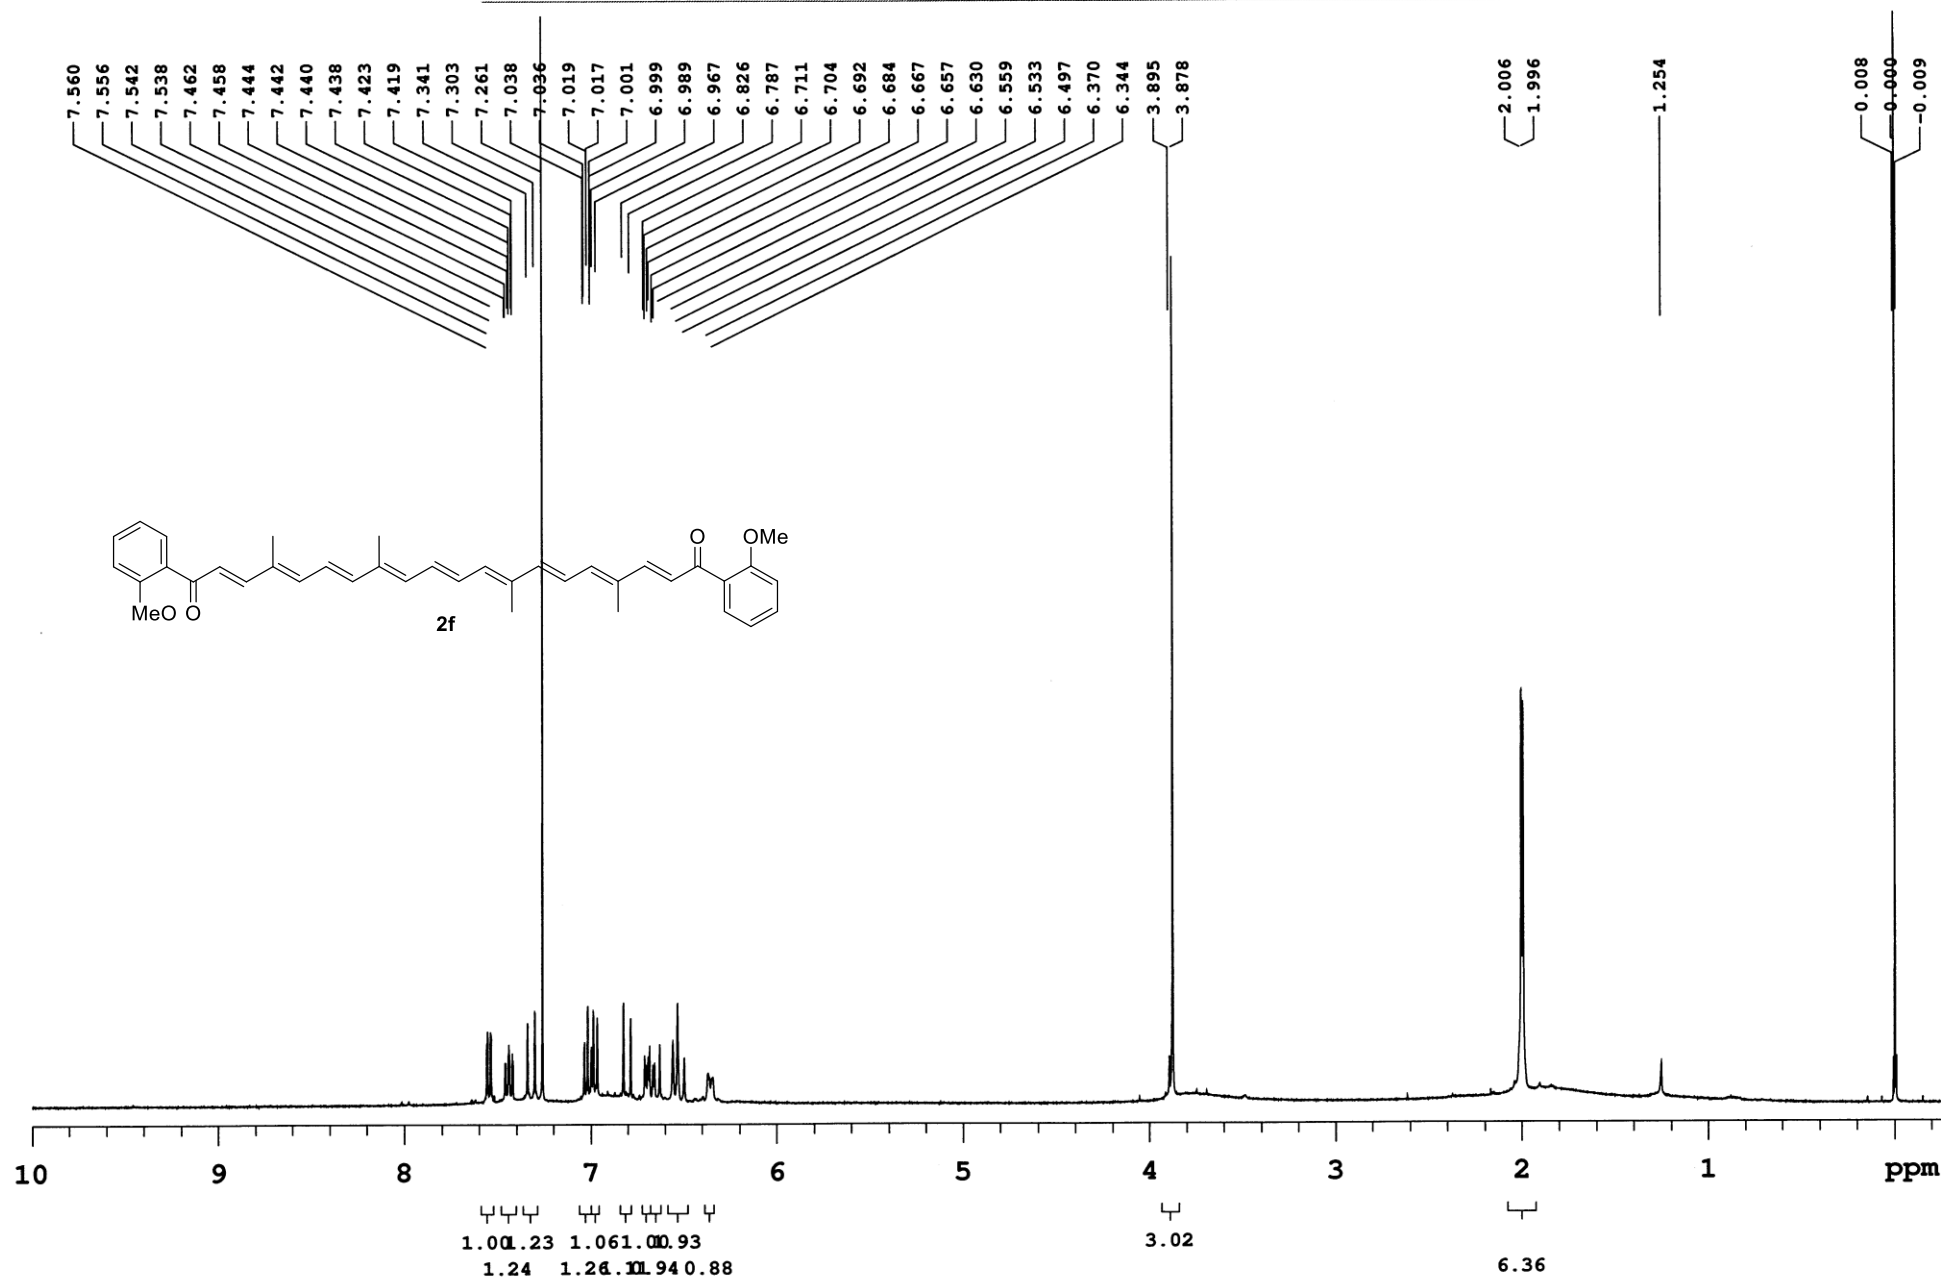

SGS-1547-1

Sample Name **SGS-1547-1**  
Date collected **2021-08-31**Pulse sequence **PROTON**  
Solvent **cdcl3**Temperature **25**  
Spectrometer **Agilent-NMR.chem.com-vnmr400**  
Study owner **vnmr1**  
Operator **vnmr1**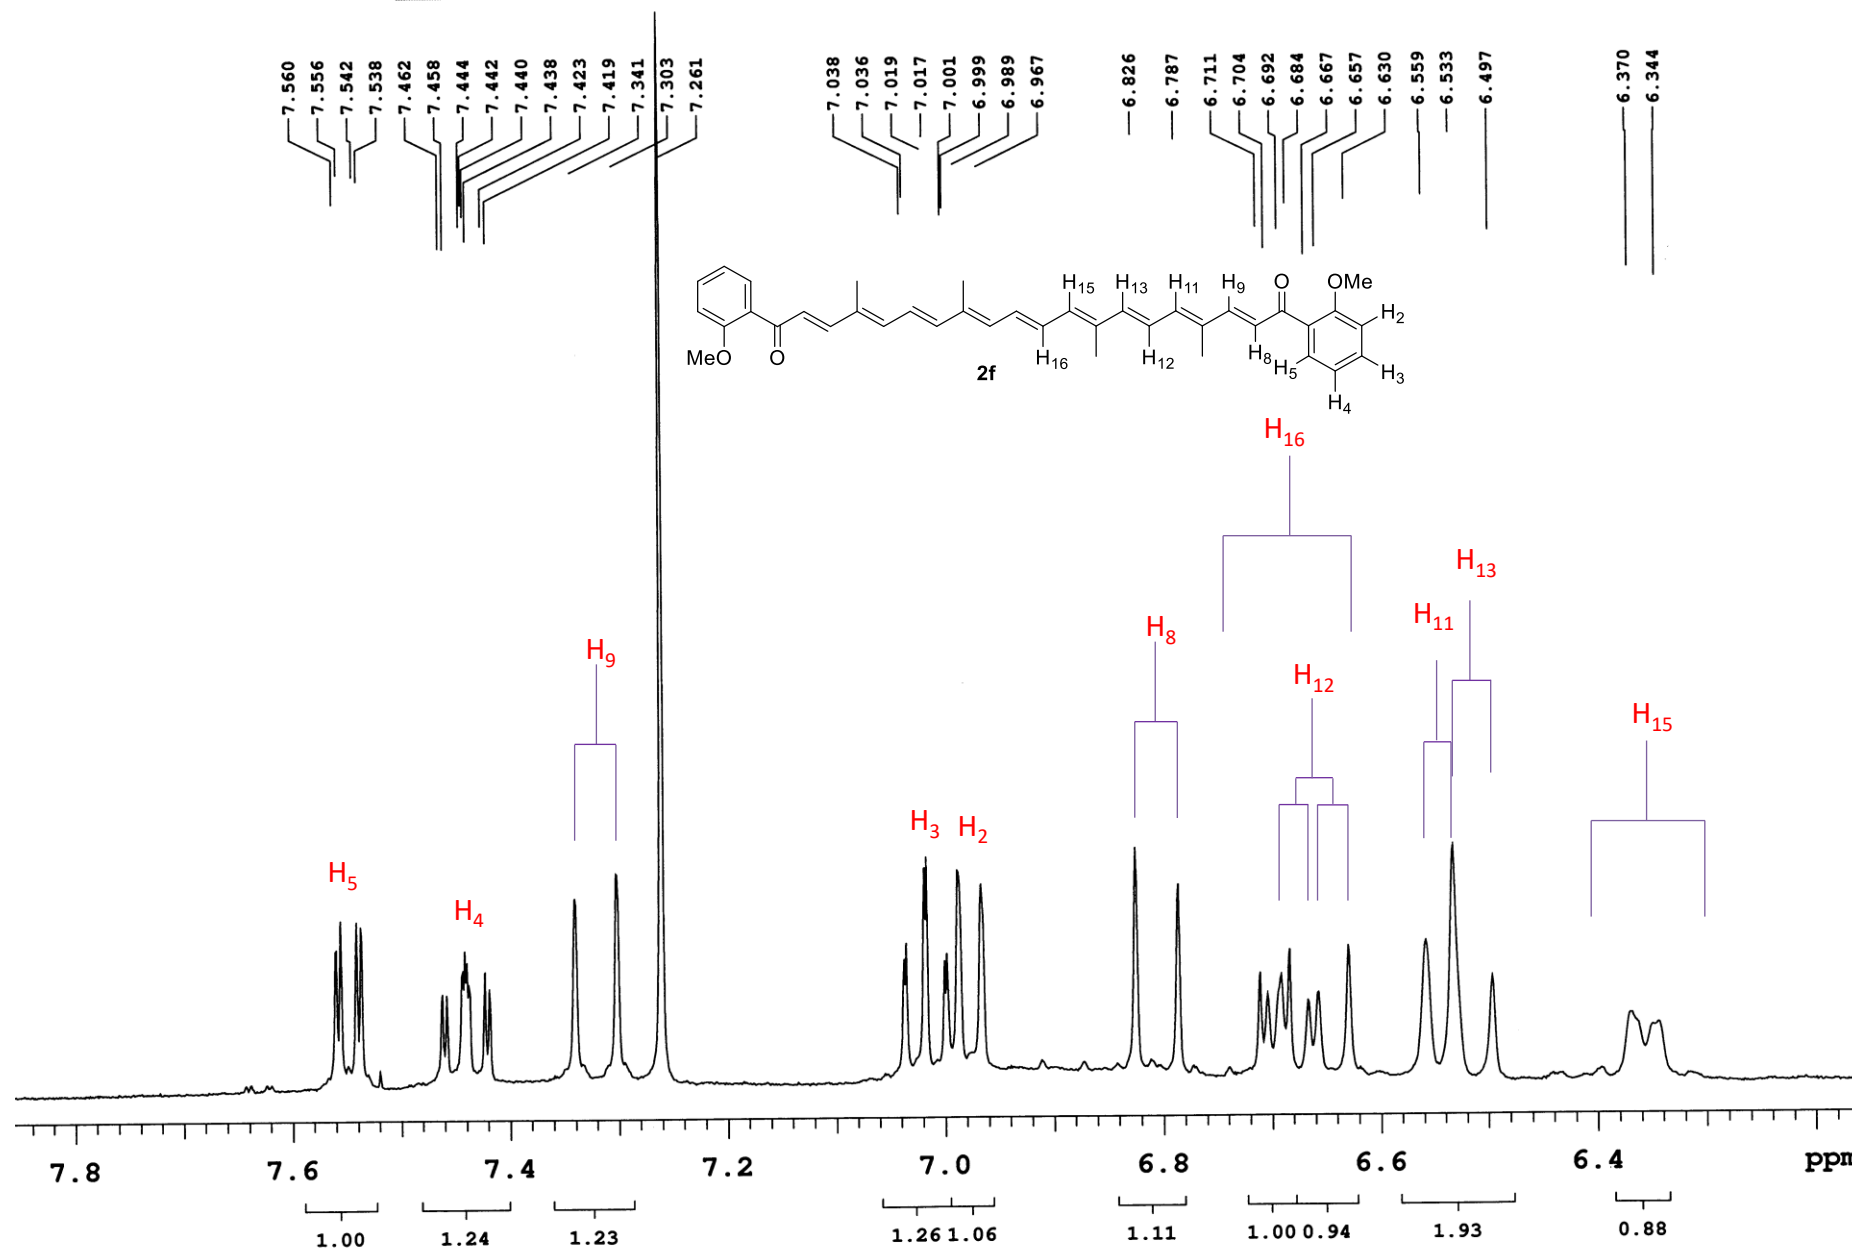

| Parameter              | Value                                                              |
|------------------------|--------------------------------------------------------------------|
| Data File Name         | F:/NMR/ 2109-koo-4-01/ SGS-1547-1_01/SGS-1547-1_CARBON_01.fid/ fid |
| Instrument             | vnmr5                                                              |
| Solvent                | cdcl3                                                              |
| Probe                  | 5mm_ATB                                                            |
| Number of Scans        | 3000                                                               |
| Acquisition Date       | 2021-09-01T10:36:07                                                |
| Spectrometer Frequency | 100.60                                                             |

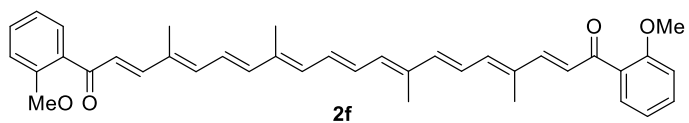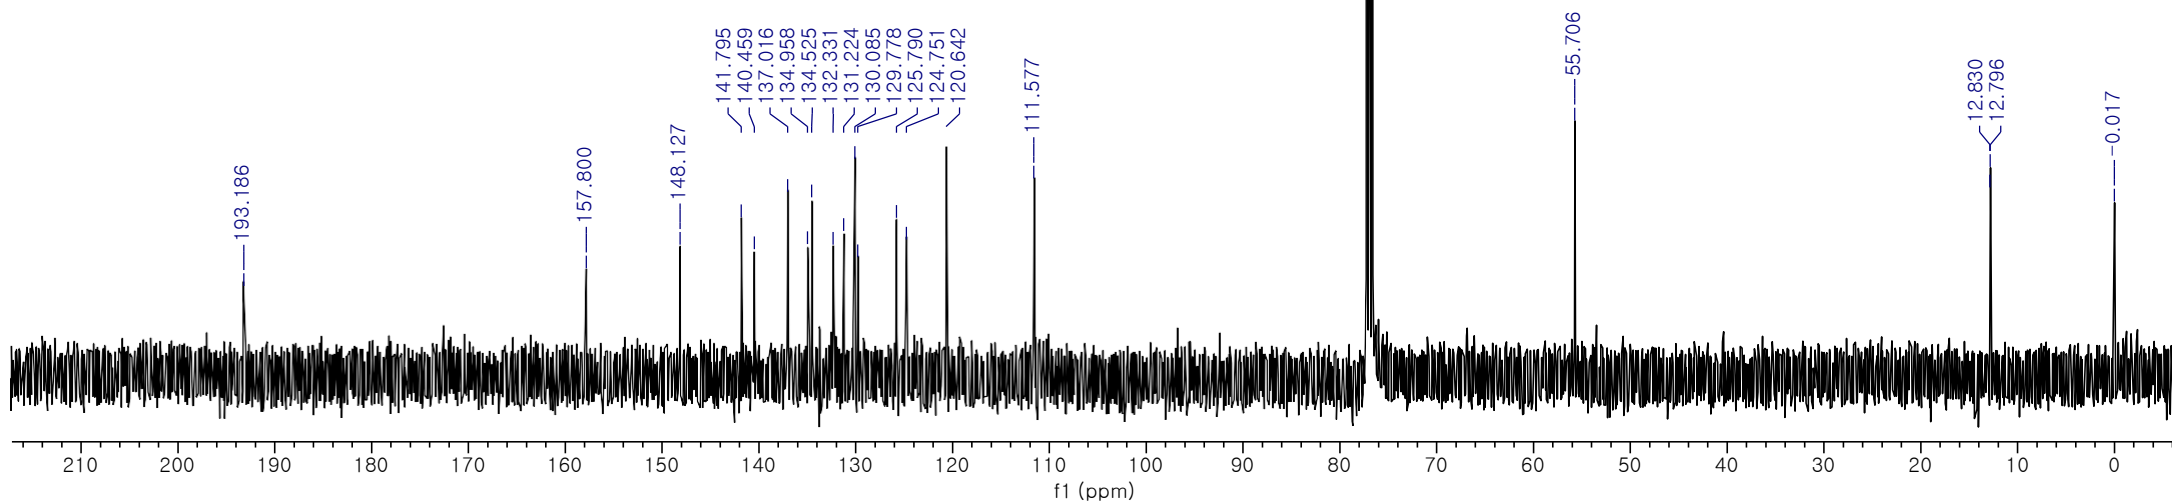

SGS-1600-2re

Sample Name **SGS-1600-2re**  
Date collected **2021-10-08**

Pulse sequence **PROTON**  
Solvent **cdcl3**

Temperature **25**  
Spectrometer **Agilent-NMR.chem.com-vnmr400**  
Study owner **vnmr1**  
Operator **vnmr1**

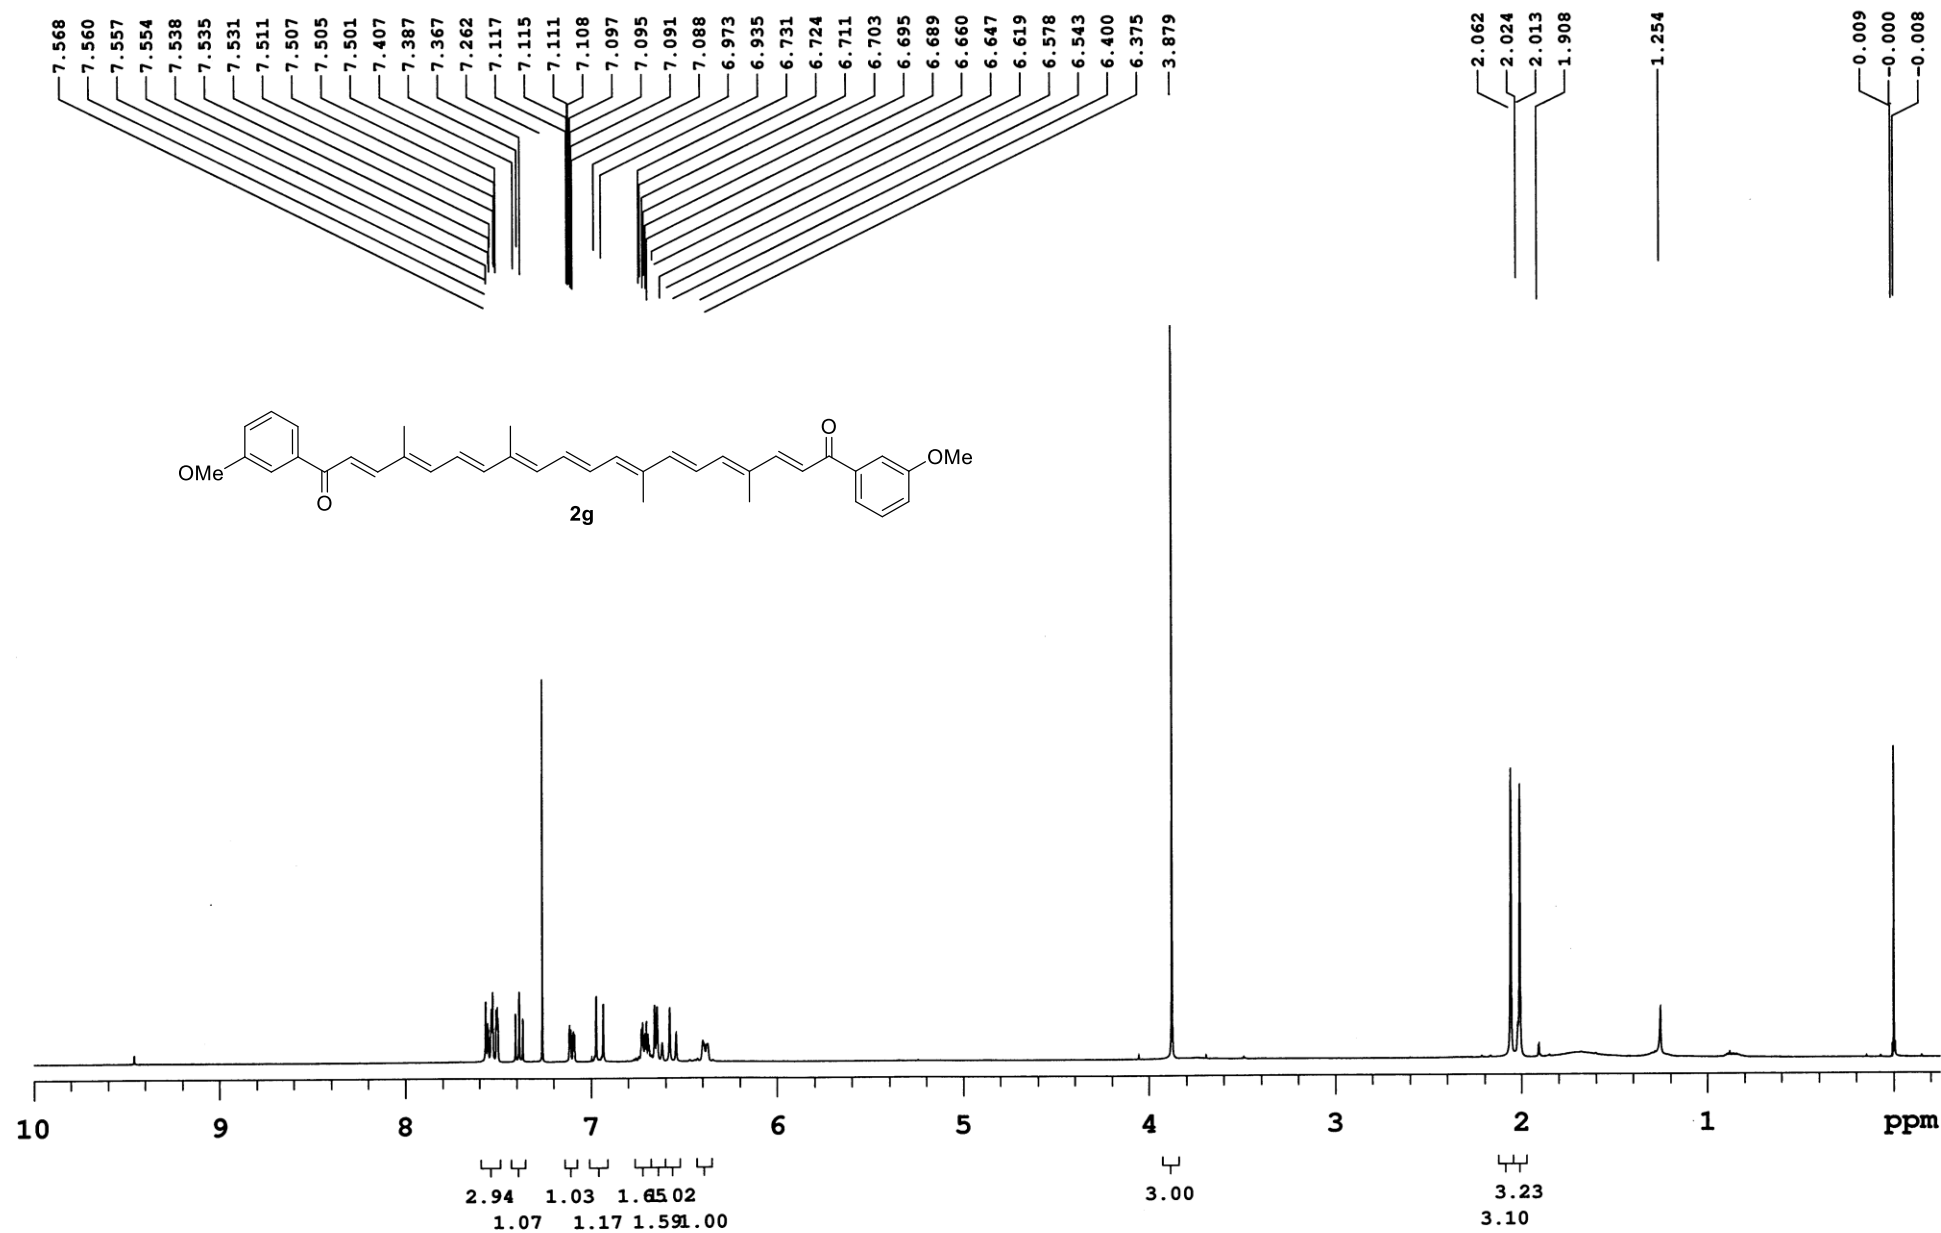

SGS-1600-2re

Sample Name **SGS-1600-2re**  
Date collected **2021-10-08**

Pulse sequence **PROTON**  
Solvent **cdcl3**

Temperature **25**  
Spectrometer **Agilent-NMR.chem.com-vnmrs400**

Study own  
Operator

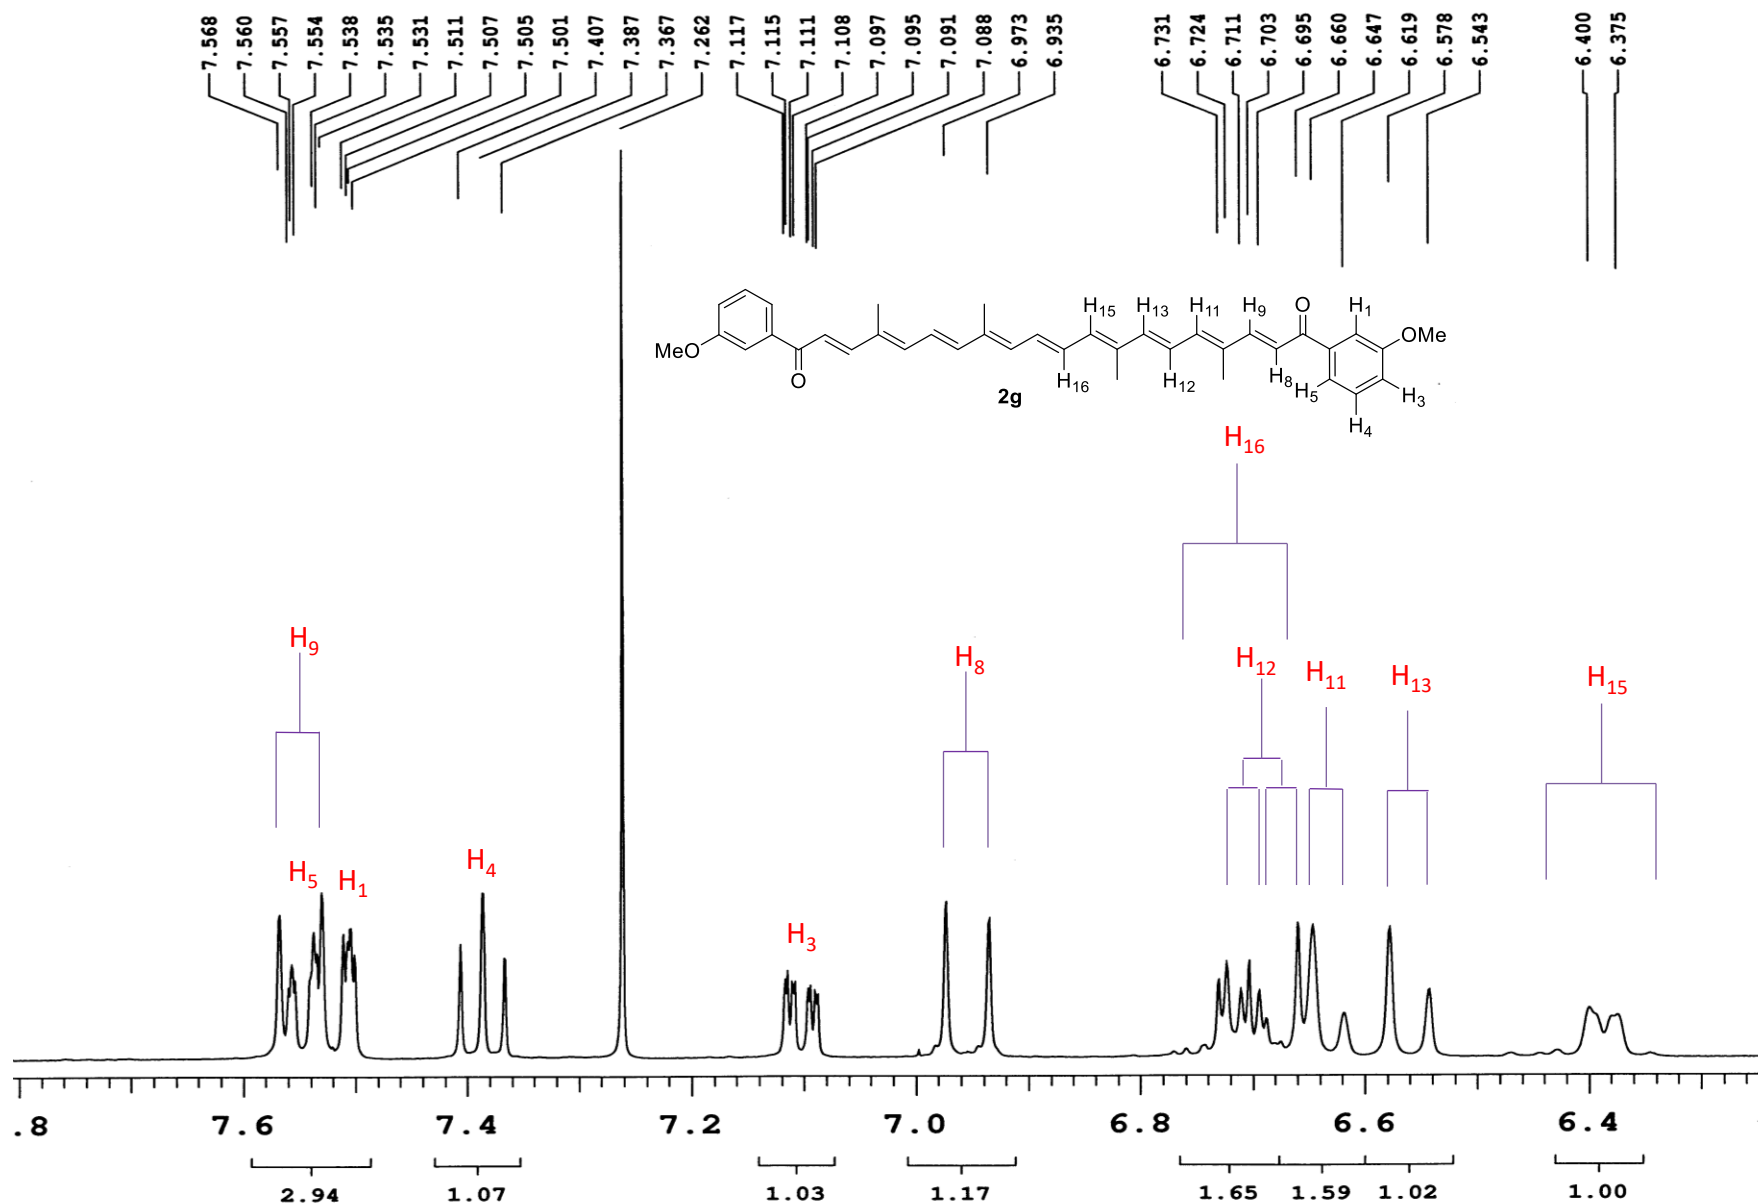

| Parameter              | Value                                                                          |
|------------------------|--------------------------------------------------------------------------------|
| Data File Name         | F:/NMR/ 2110-koo-4-12/ SGS-1600-2re-13C_01/ SGS-1600-2re-13C_CARBON_01.fid/fid |
| Instrument             | vnmrs                                                                          |
| Solvent                | cdcl3                                                                          |
| Probe                  | 5mm_ATB                                                                        |
| Number of Scans        | 2000                                                                           |
| Acquisition Date       | 2021-10-08T20:33:05                                                            |
| Spectrometer Frequency | 100.60                                                                         |

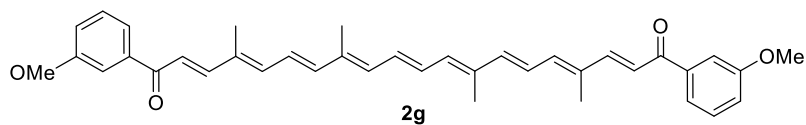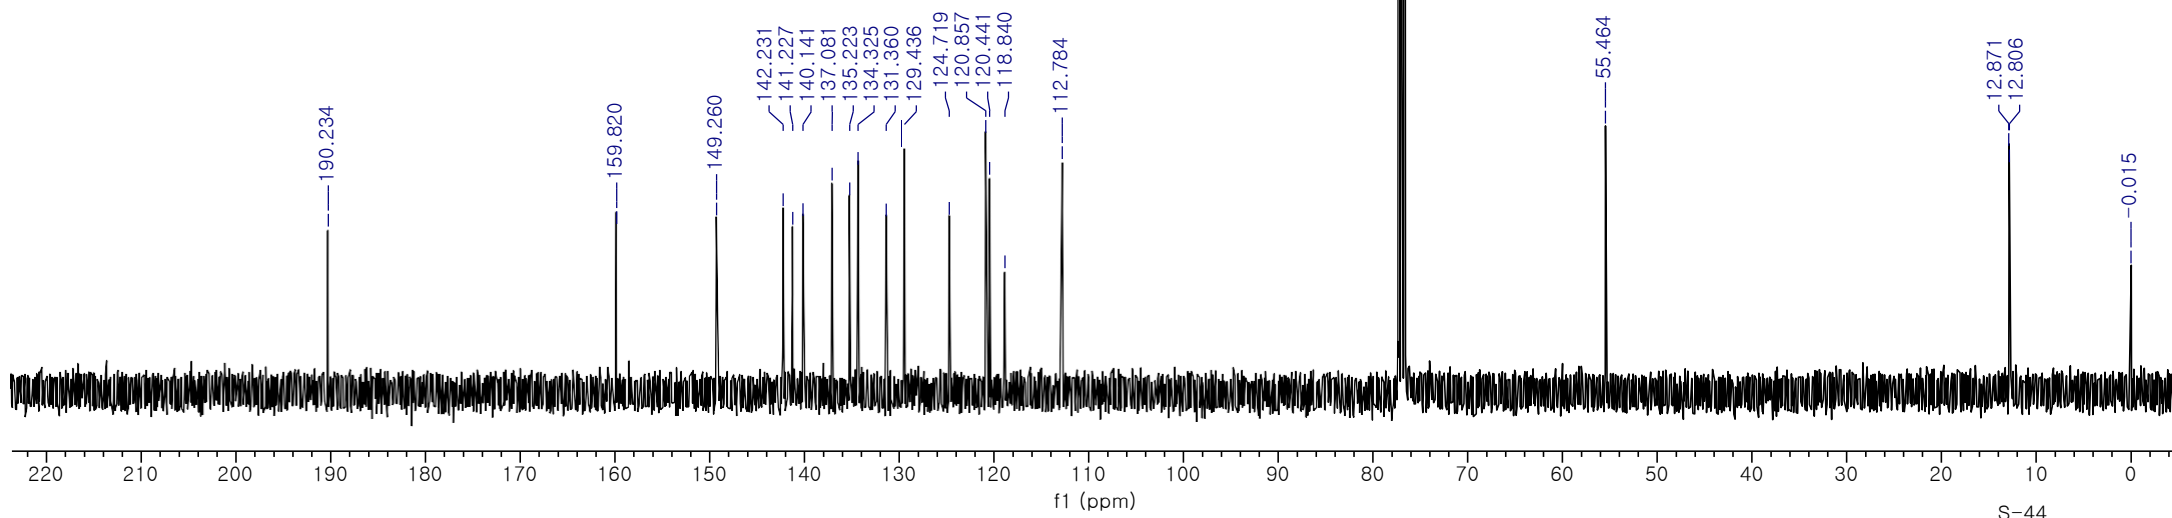



SGS-1629-3re

Sample Name **SGS-1629-3re**  
Date collected **2022-01-05**Pulse sequence **PROTON**  
Solvent **cdcl3**Temperature **25**  
Spectrometer **Agilent-NMR.chem.com-vnmrs400**Study owner **vnmr1**  
Operator **vnmr1**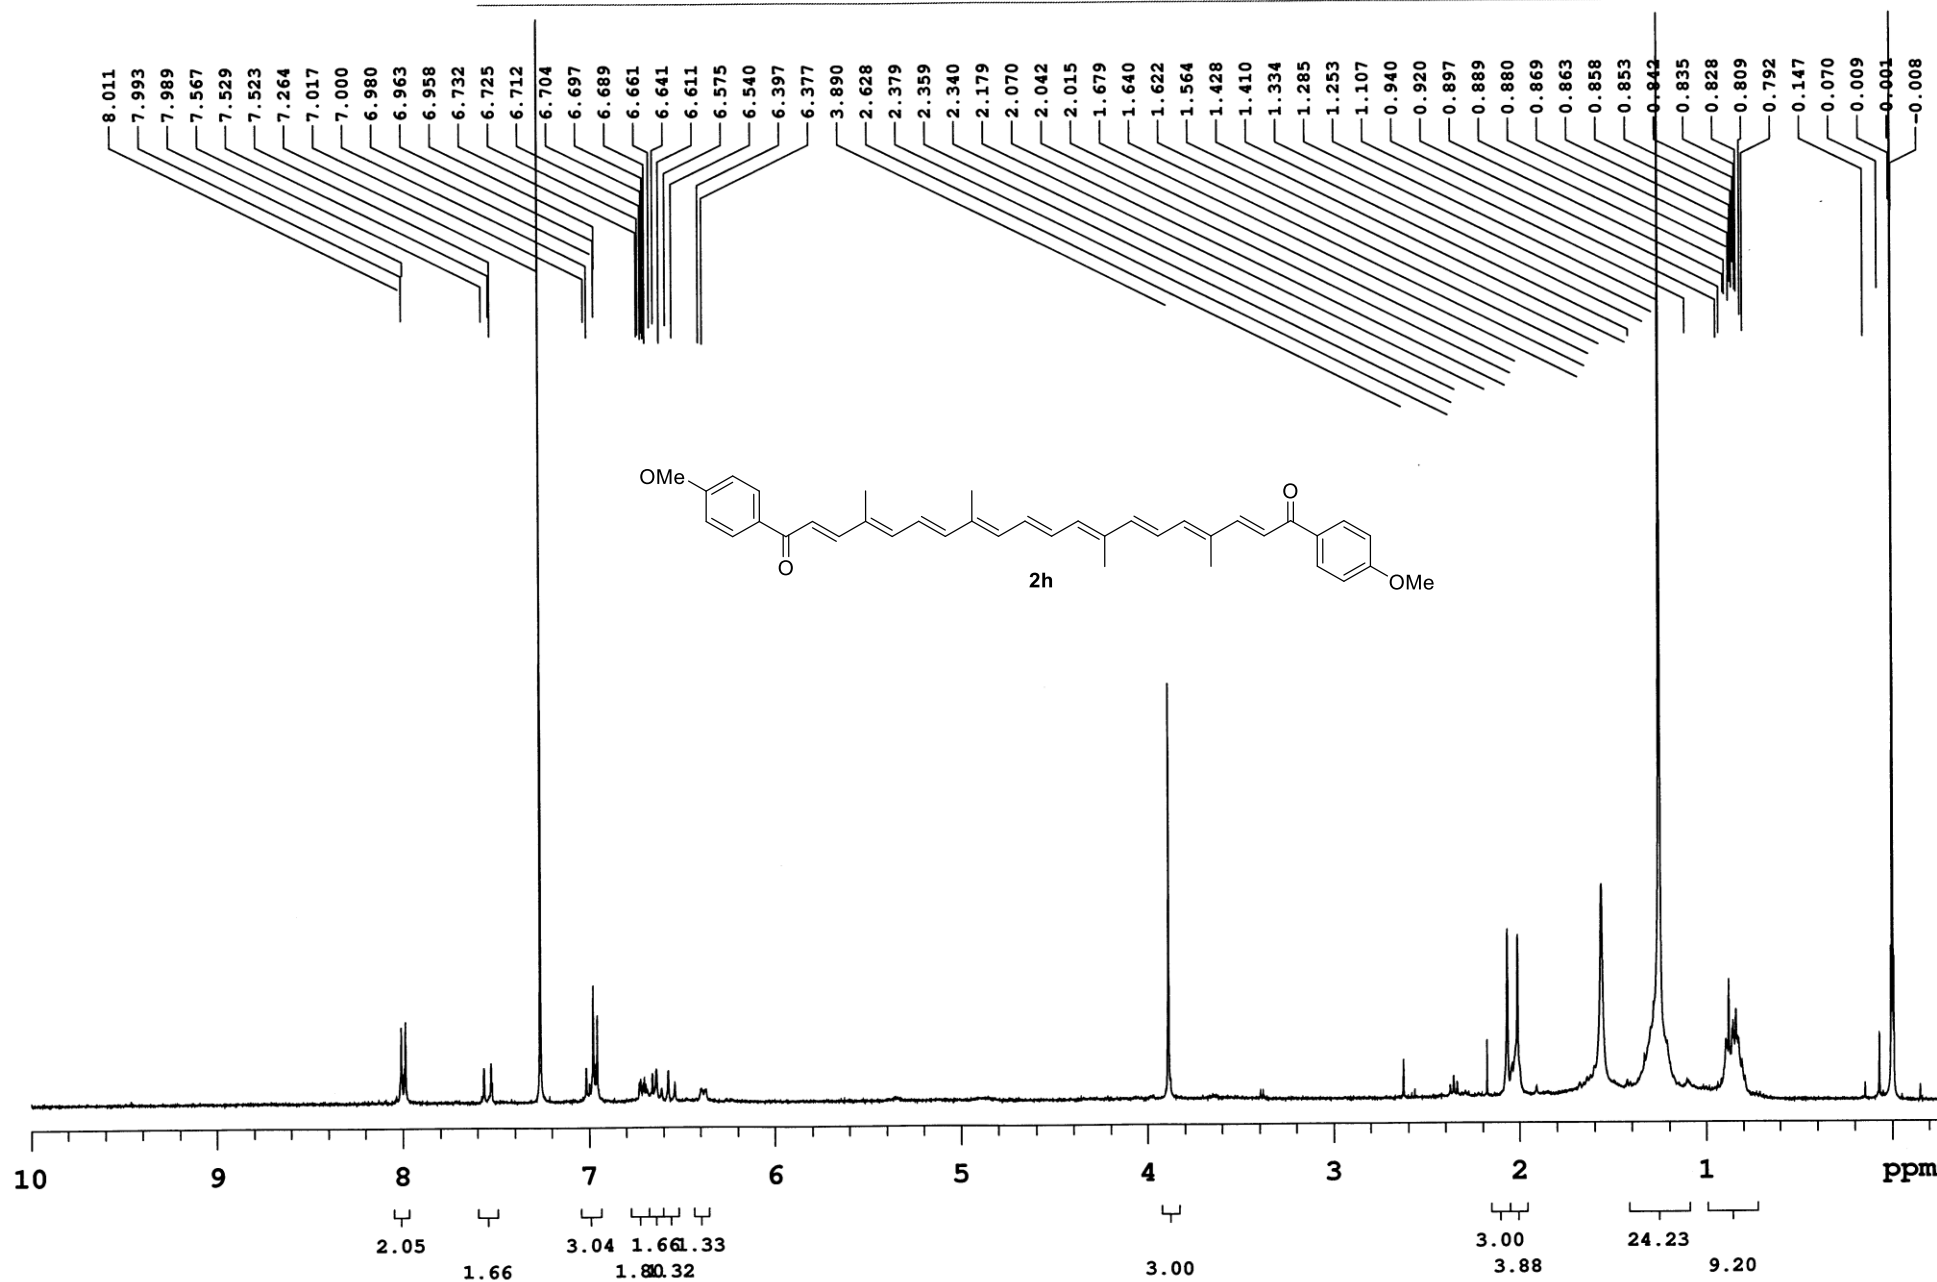

SGS-1629-3re

Sample Name **SGS-1629-3re**  
Date collected **2022-01-05**

Pulse sequence **PROTON**  
Solvent **cdcl3**

Temperature **25**  
Spectrometer **Agilent-NMR.chem.com-vnmrs400**  
Study owner **vnmr1**  
Operator **vnmr1**

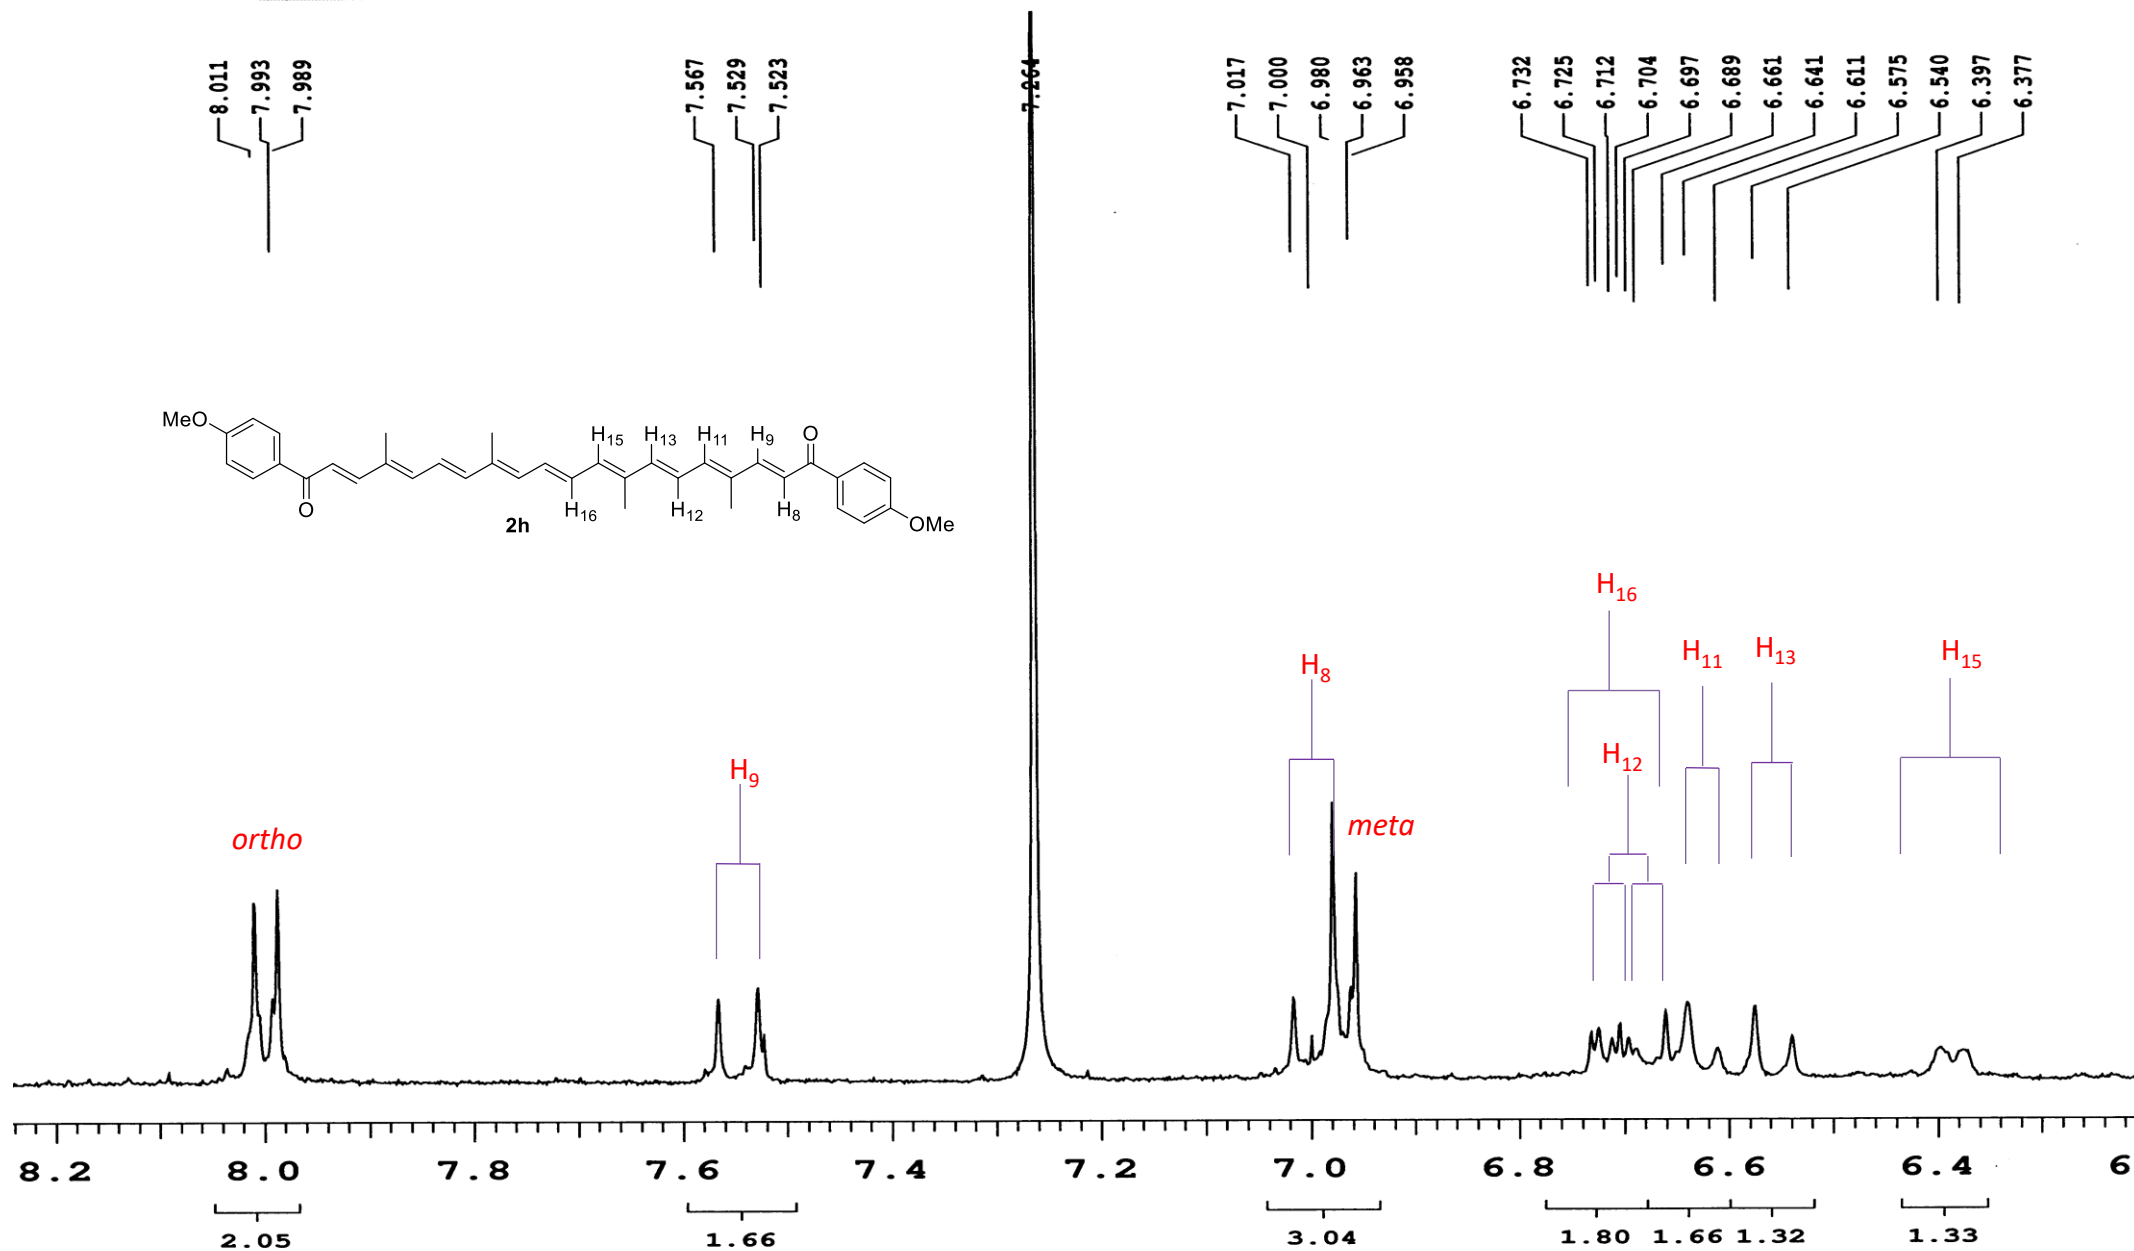

Sample Name **SGS-1573-4t**  
Date collected **2021-09-24**

Pulse sequence **PROTON**  
Solvent **cdcl3**

Temperature 25 Study owner vnmr1  
Spectrometer Agilent-NMR.chem.com-vnmrs409 Operator vnmr1

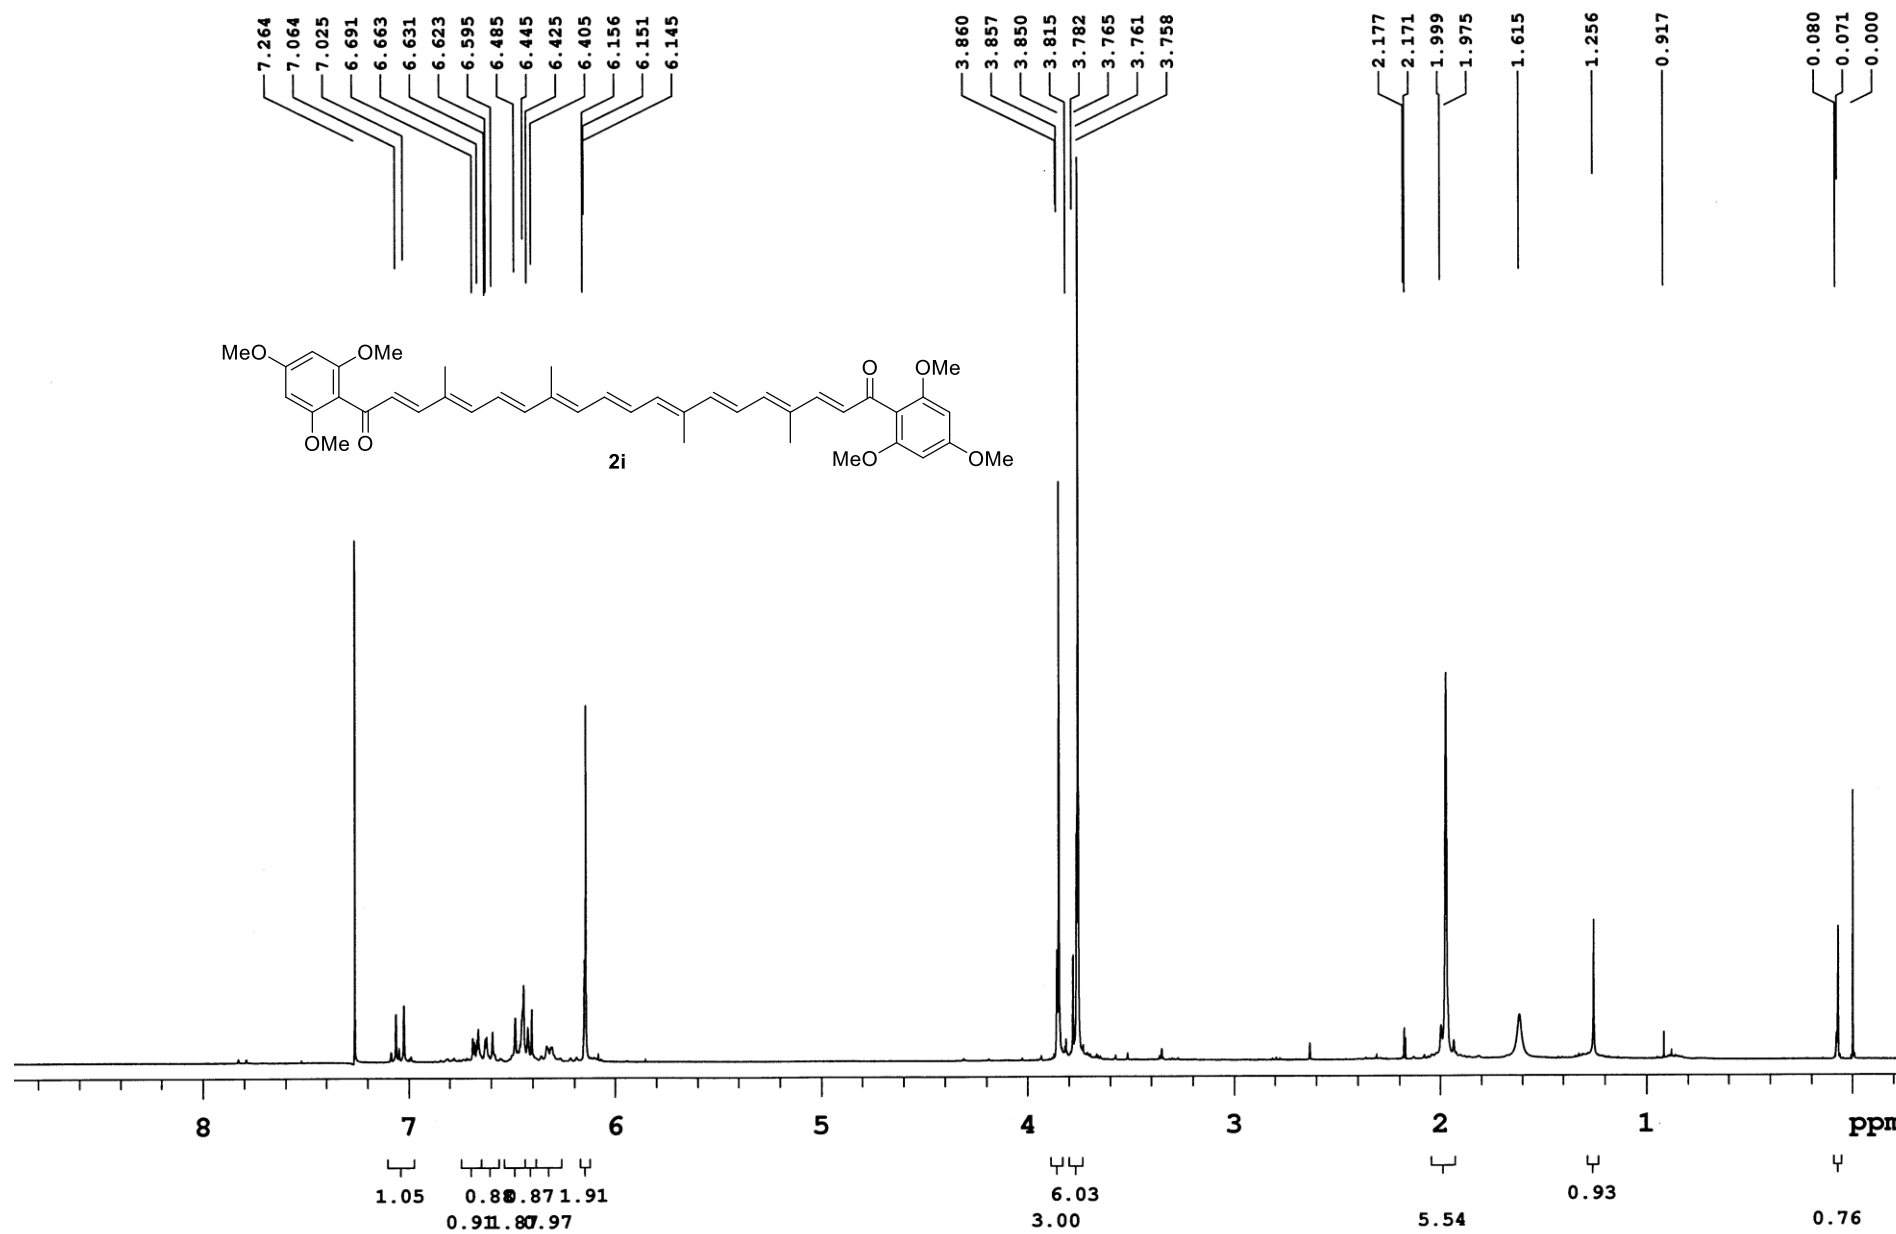

Sample Name **SGS-1573-4t**  
Date collected **2021-09-24**

Pulse sequence **PROTON**  
Solvent **cdcl3**

Temperature 25  
Spectrometer Ag

Study owner vnmr1  
rs409 Operator vnmr1

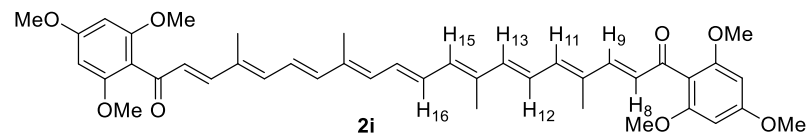

SGS-1573-4t

Sample Name **SGS-1573-4t**  
Date collected **2021-09-29**

Pulse sequence **CARBON**  
Solvent **cdcl3**

Temperature **25**  
Spectrometer **Agilent-NMR.chem.com-vnmrs400**

Study owner **vnmr1**  
Operator **vnmr1**

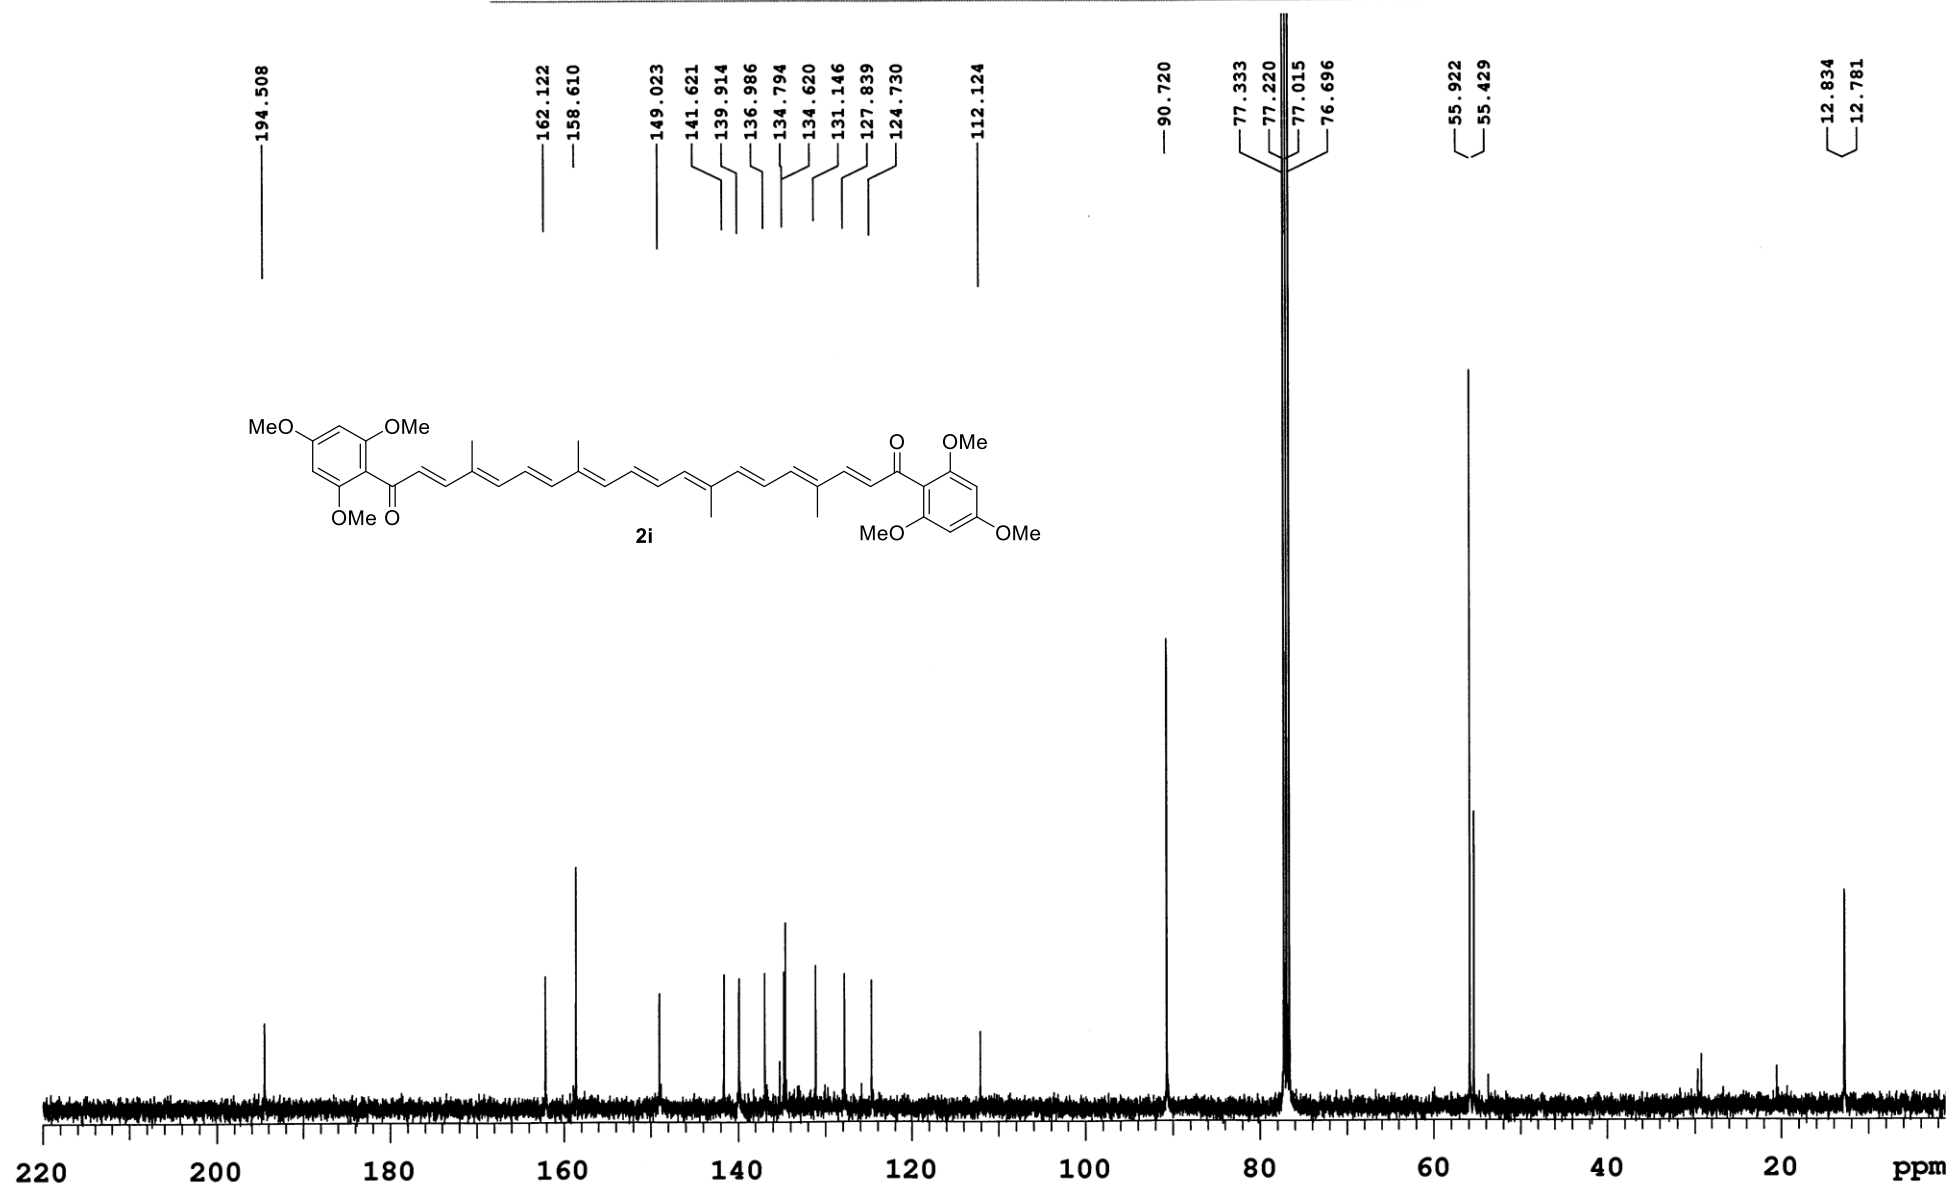

SGS-1570-EA2

Sample Name **SGS-1570-EA2**  
Date collected **2021-09-16**Pulse sequence **PROTON**  
Solvent **cdcl3**Temperature **25**  
Spectrometer **Agilent-NMR.chem.com-vnmrs400**  
Study owner **vnmr1**  
Operator **vnmr1**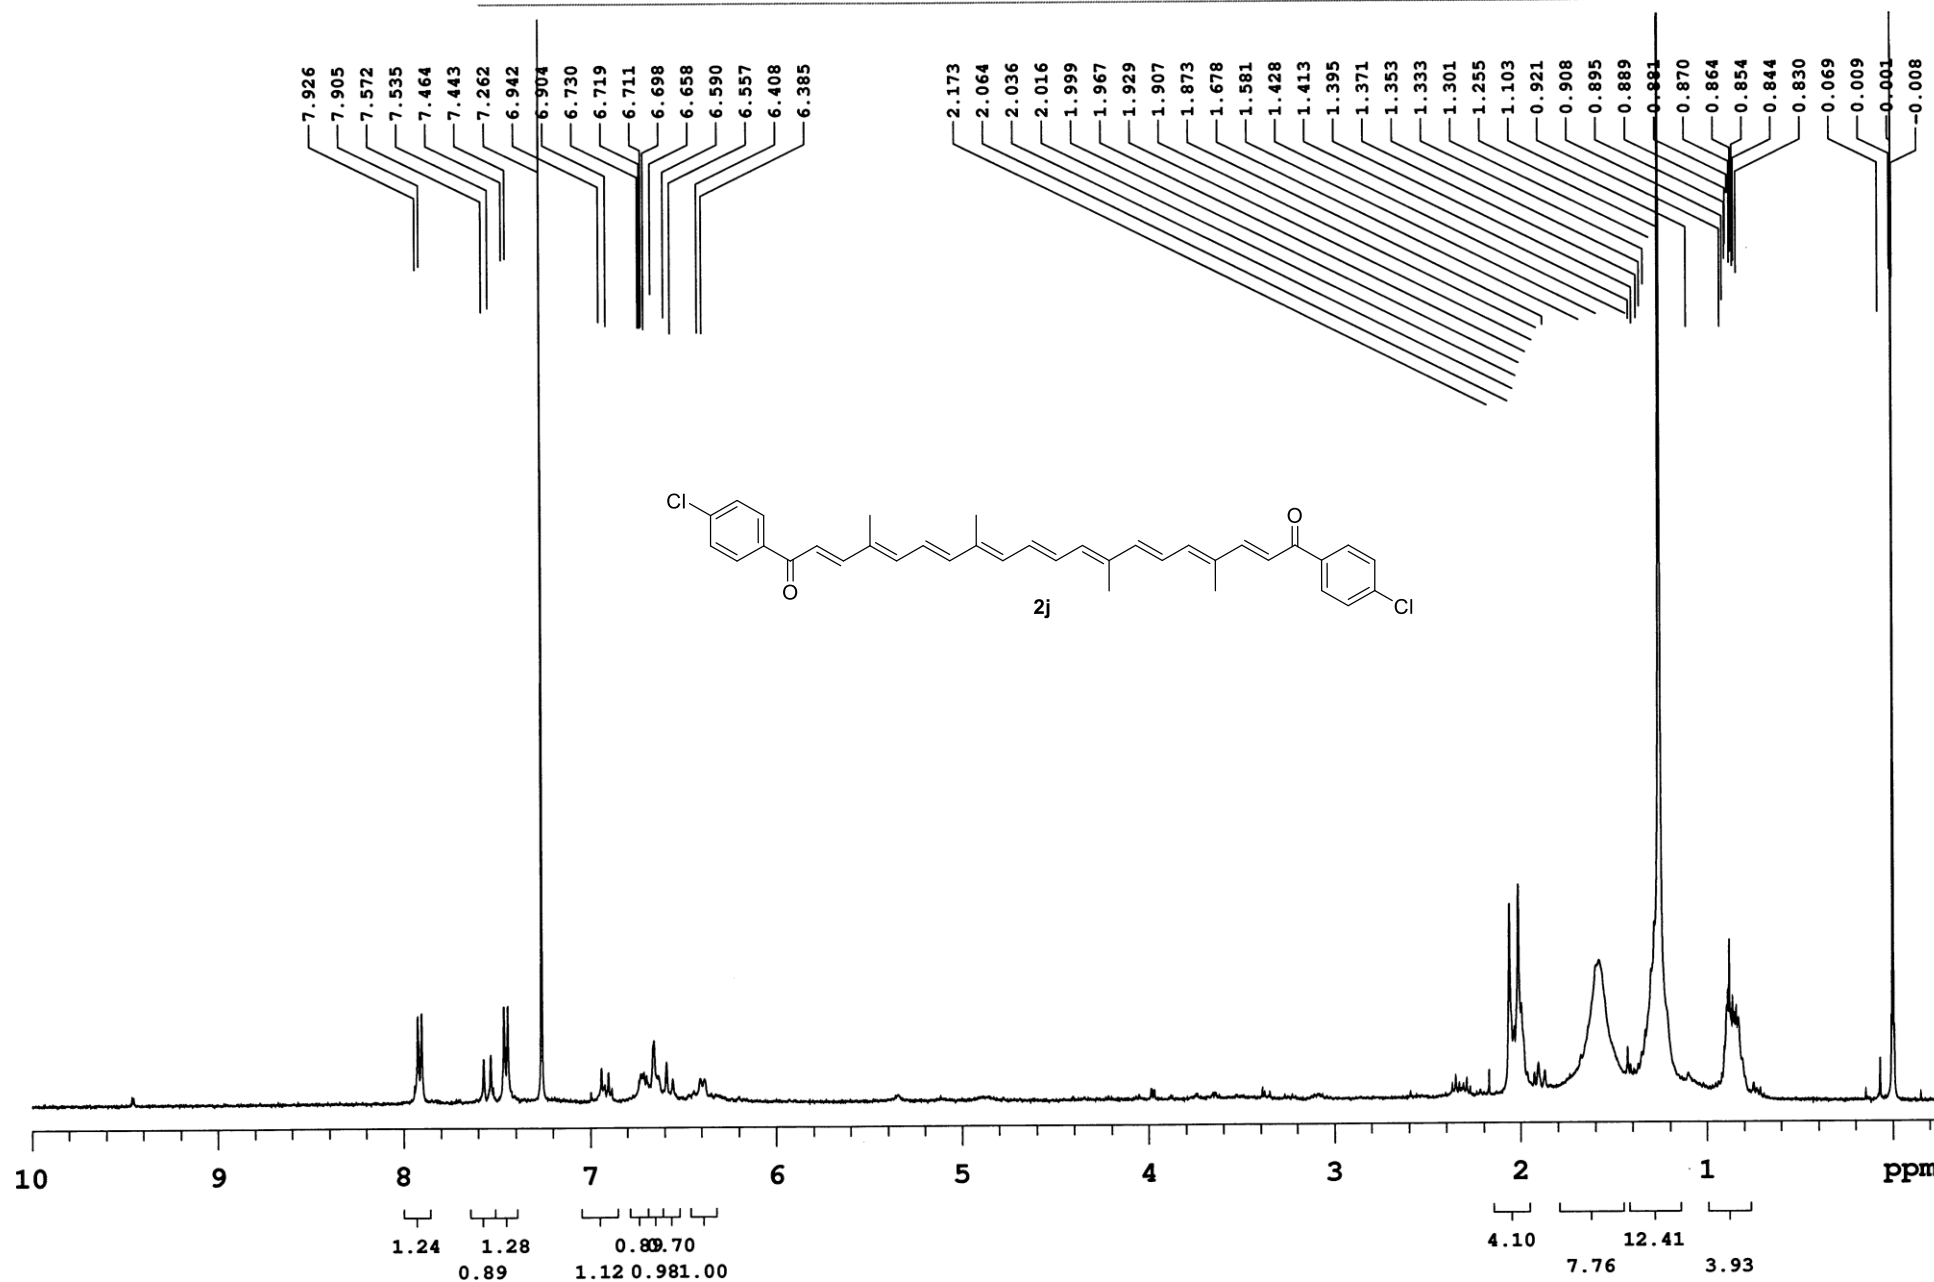

SGS-1570-EA2

Sample Name **SGS-1570-EA2**  
Date collected **2021-09-16**

Pulse sequence **PROTON**  
Solvent **cdcl3**

Temperature **25**  
Spectrometer **Agilent-NMR.chem.com-vnmrs400**

Study owner **vnn**  
Operator **vnmr1**

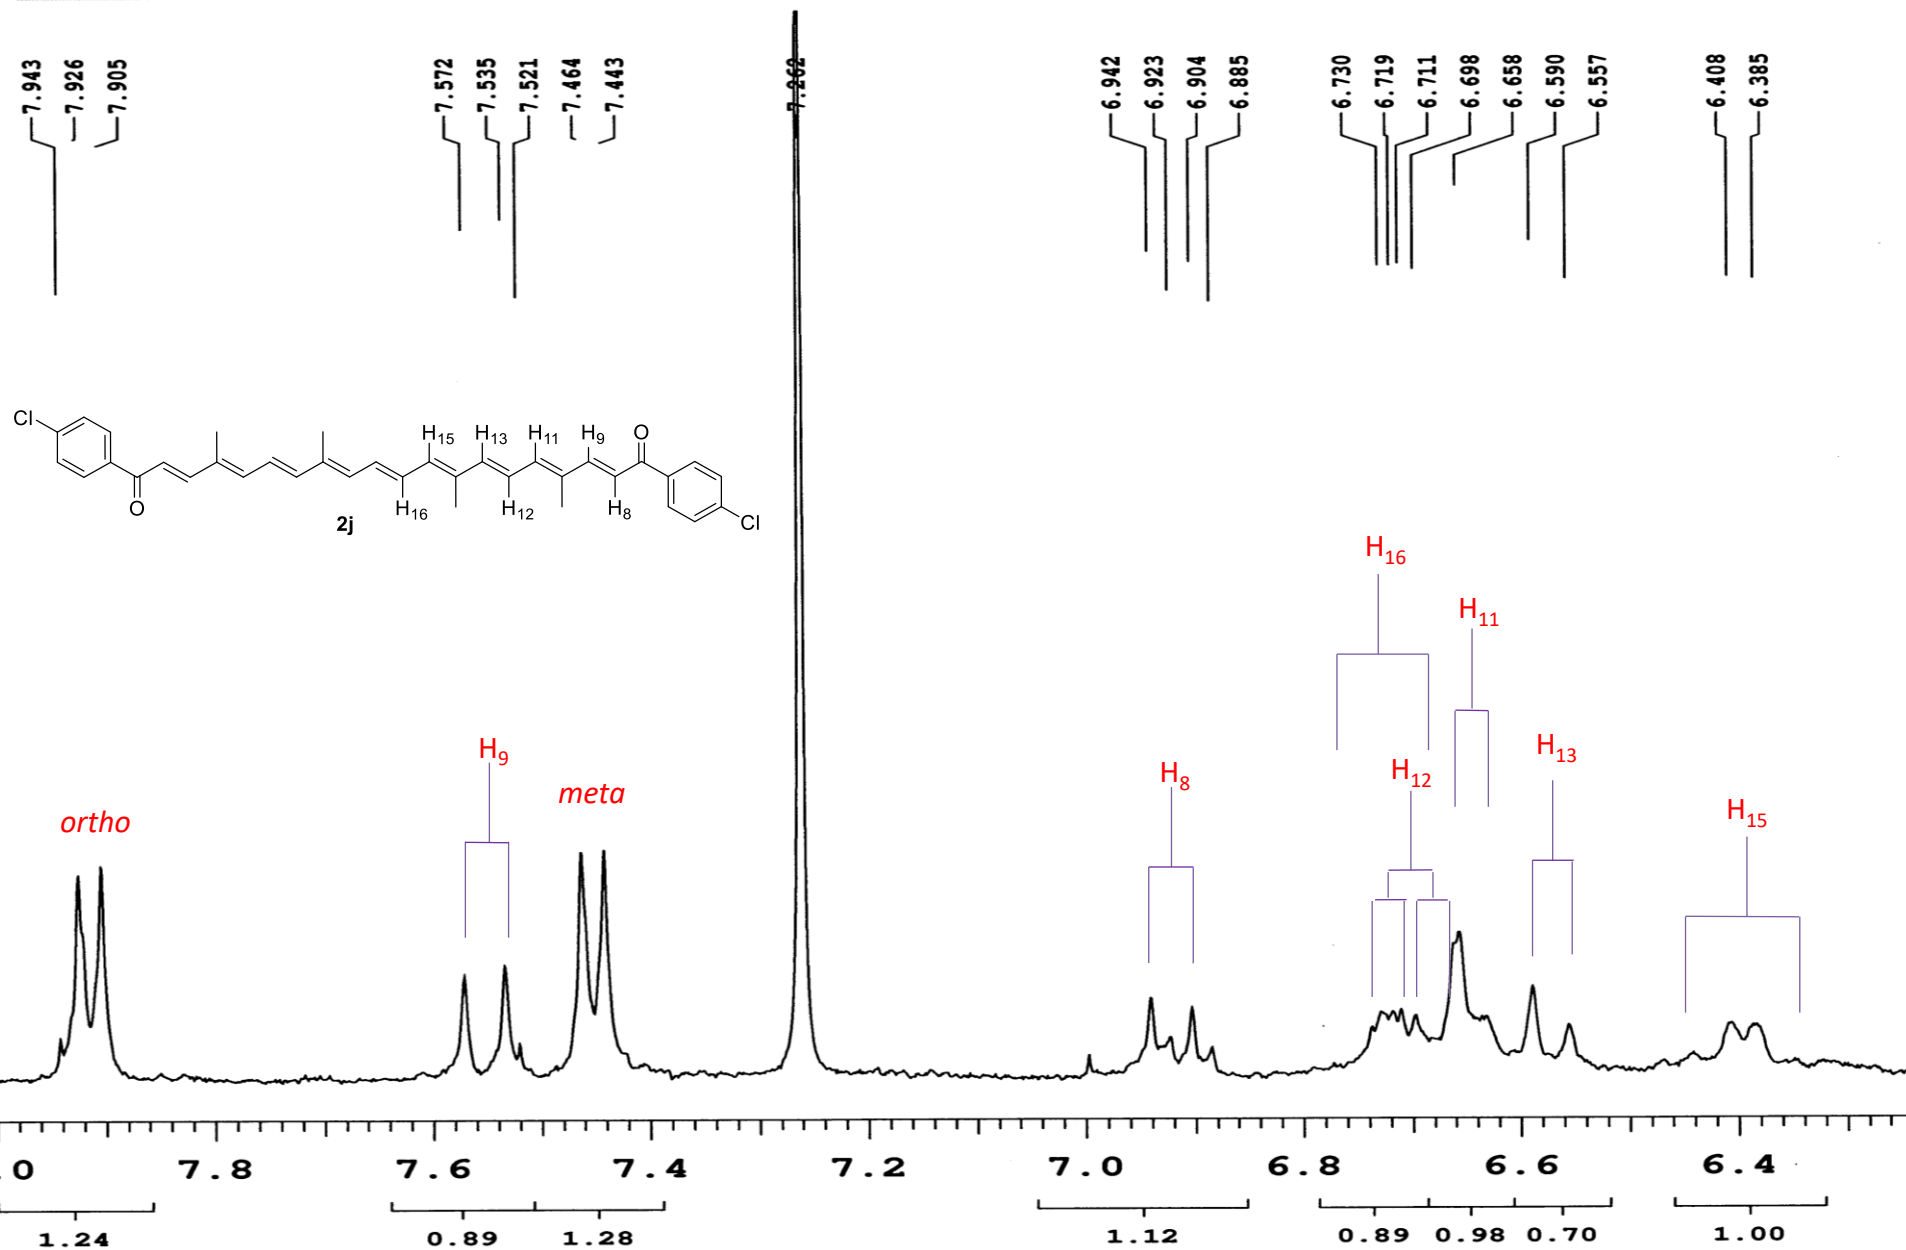

Temperature 20 Study owner vnmr1  
Spectrometer Agilent-NMR.chem.com-vnmrs400 Operator vnmr1

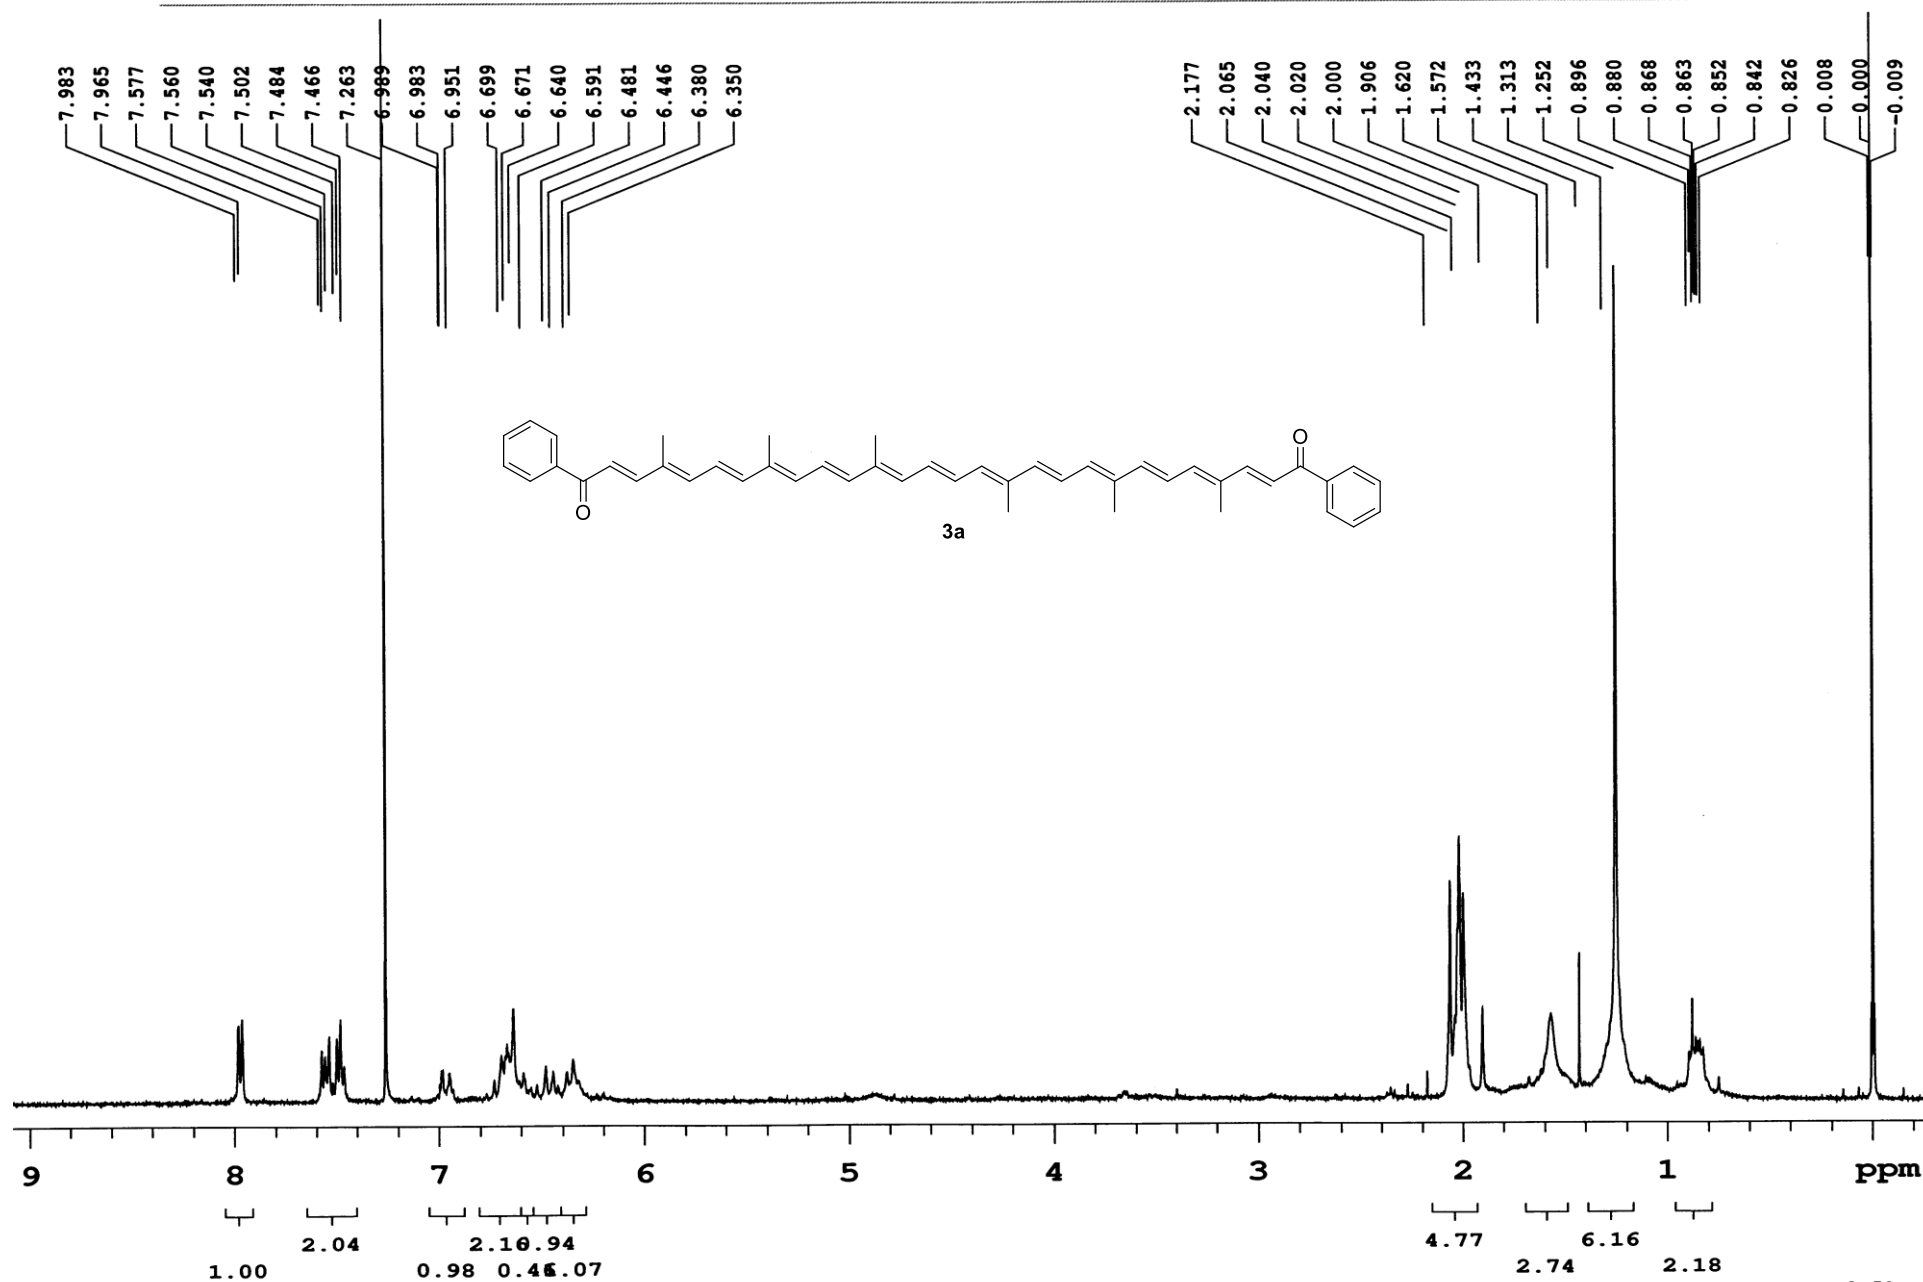



Sample Name **SGS-2130-CI-3re**  
Date collected **2022-02-16**

Pulse sequence **PROTON**  
Solvent **cdcl3**

Temperature 20 Spectrometer Agilent-NMR.chem.com-vnmrs400

Study owner vnmr1  
Operator vnmr1

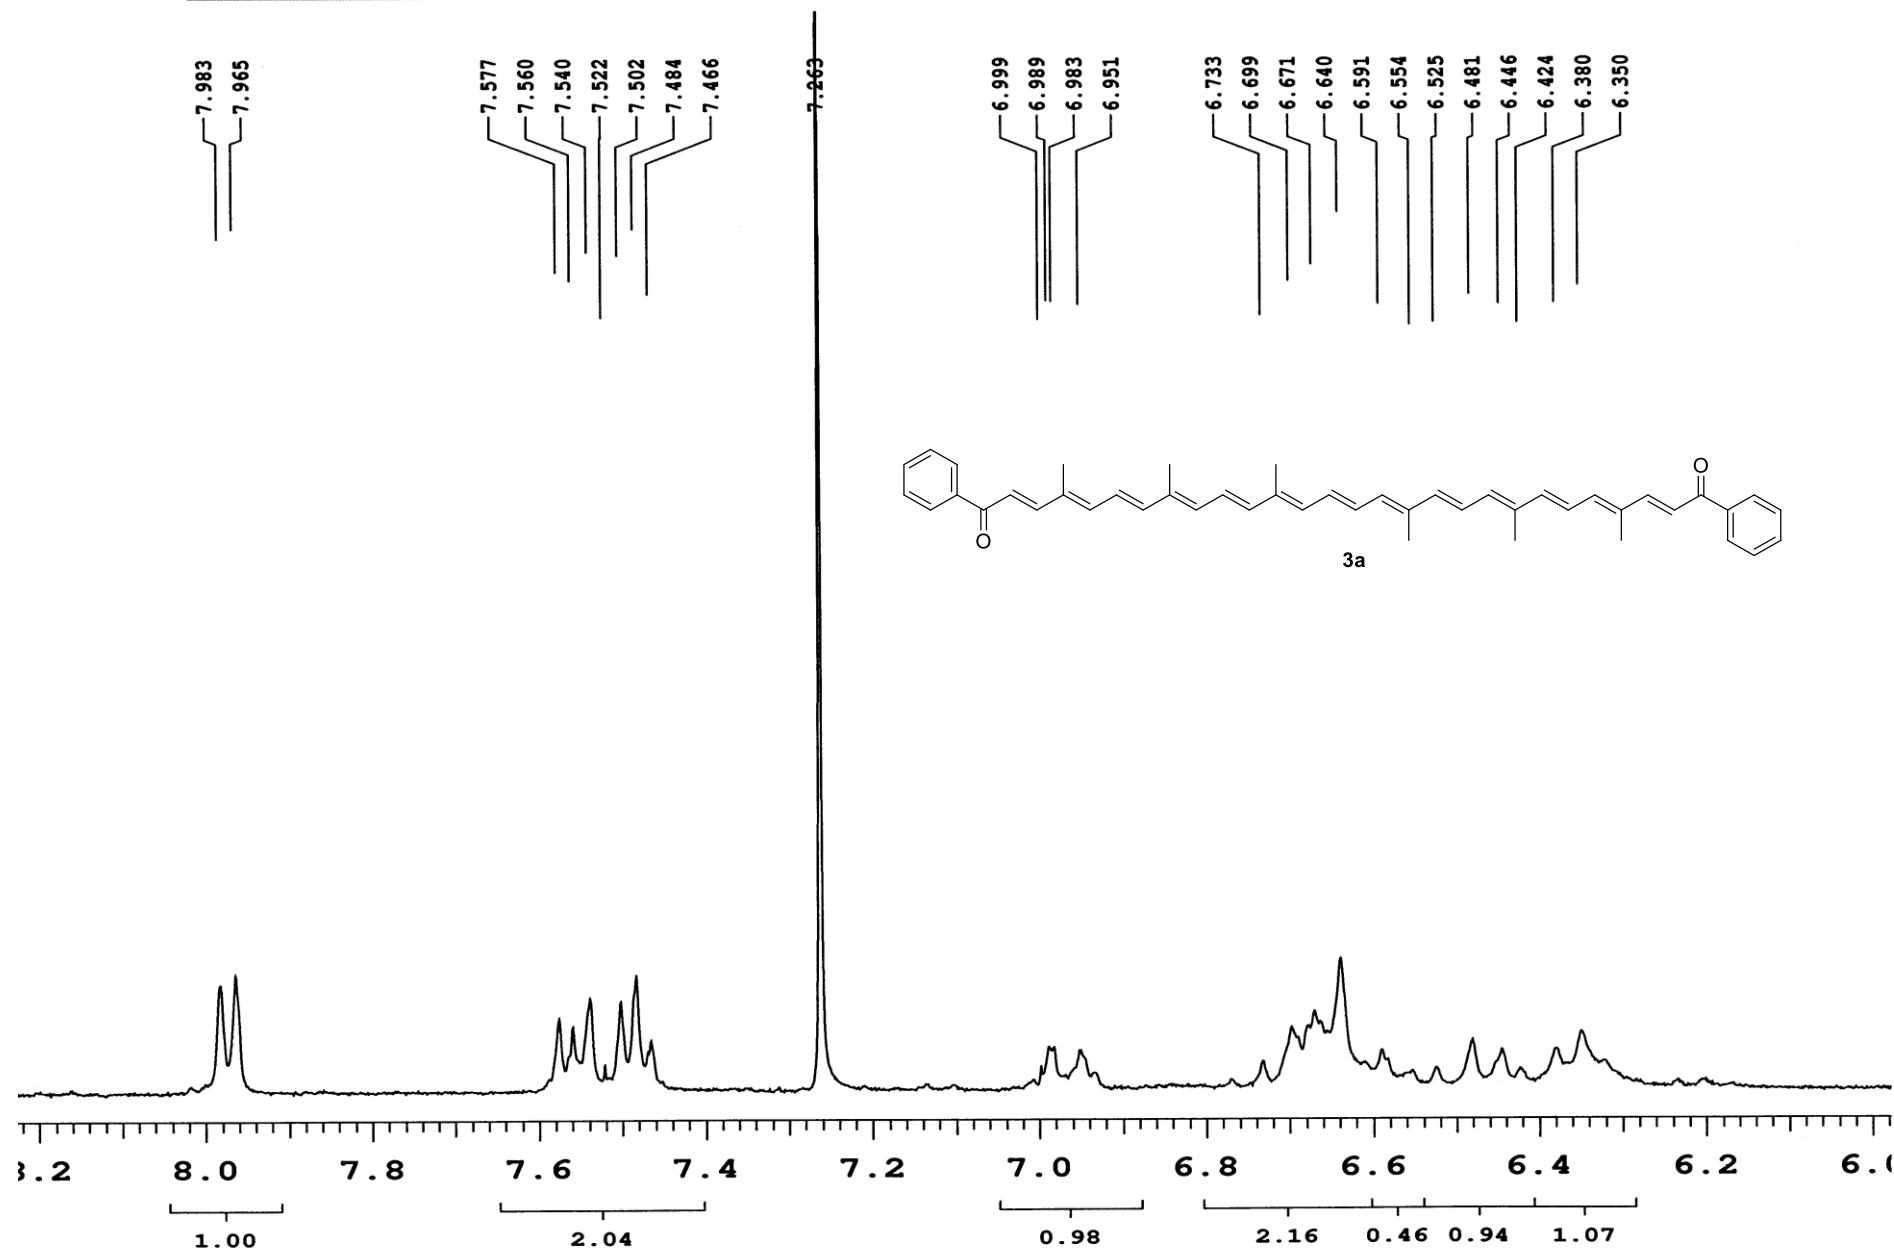

Sample Name **SGS-1590-32**  
Date collected **2021-10-05**

Pulse sequence **PROTON**  
Solvent **cdcl3**

Temperature **25** Stu  
Spectrometer **Agilent-NMR.chem.com-vnmrs400**

Study owner **vnmr1**  
rs400 operator **vnmr1**

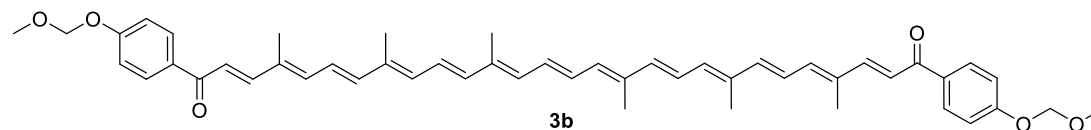

Sample Name **SGS-1590-32**  
Date collected **2021-10-05**

Pulse sequence **PROTON**  
Solvent **cdcl3**

Temperature **25**  
Spectrometer **Ag**

Study owner **vnmr1**  
 s400 operator **vnmr1**

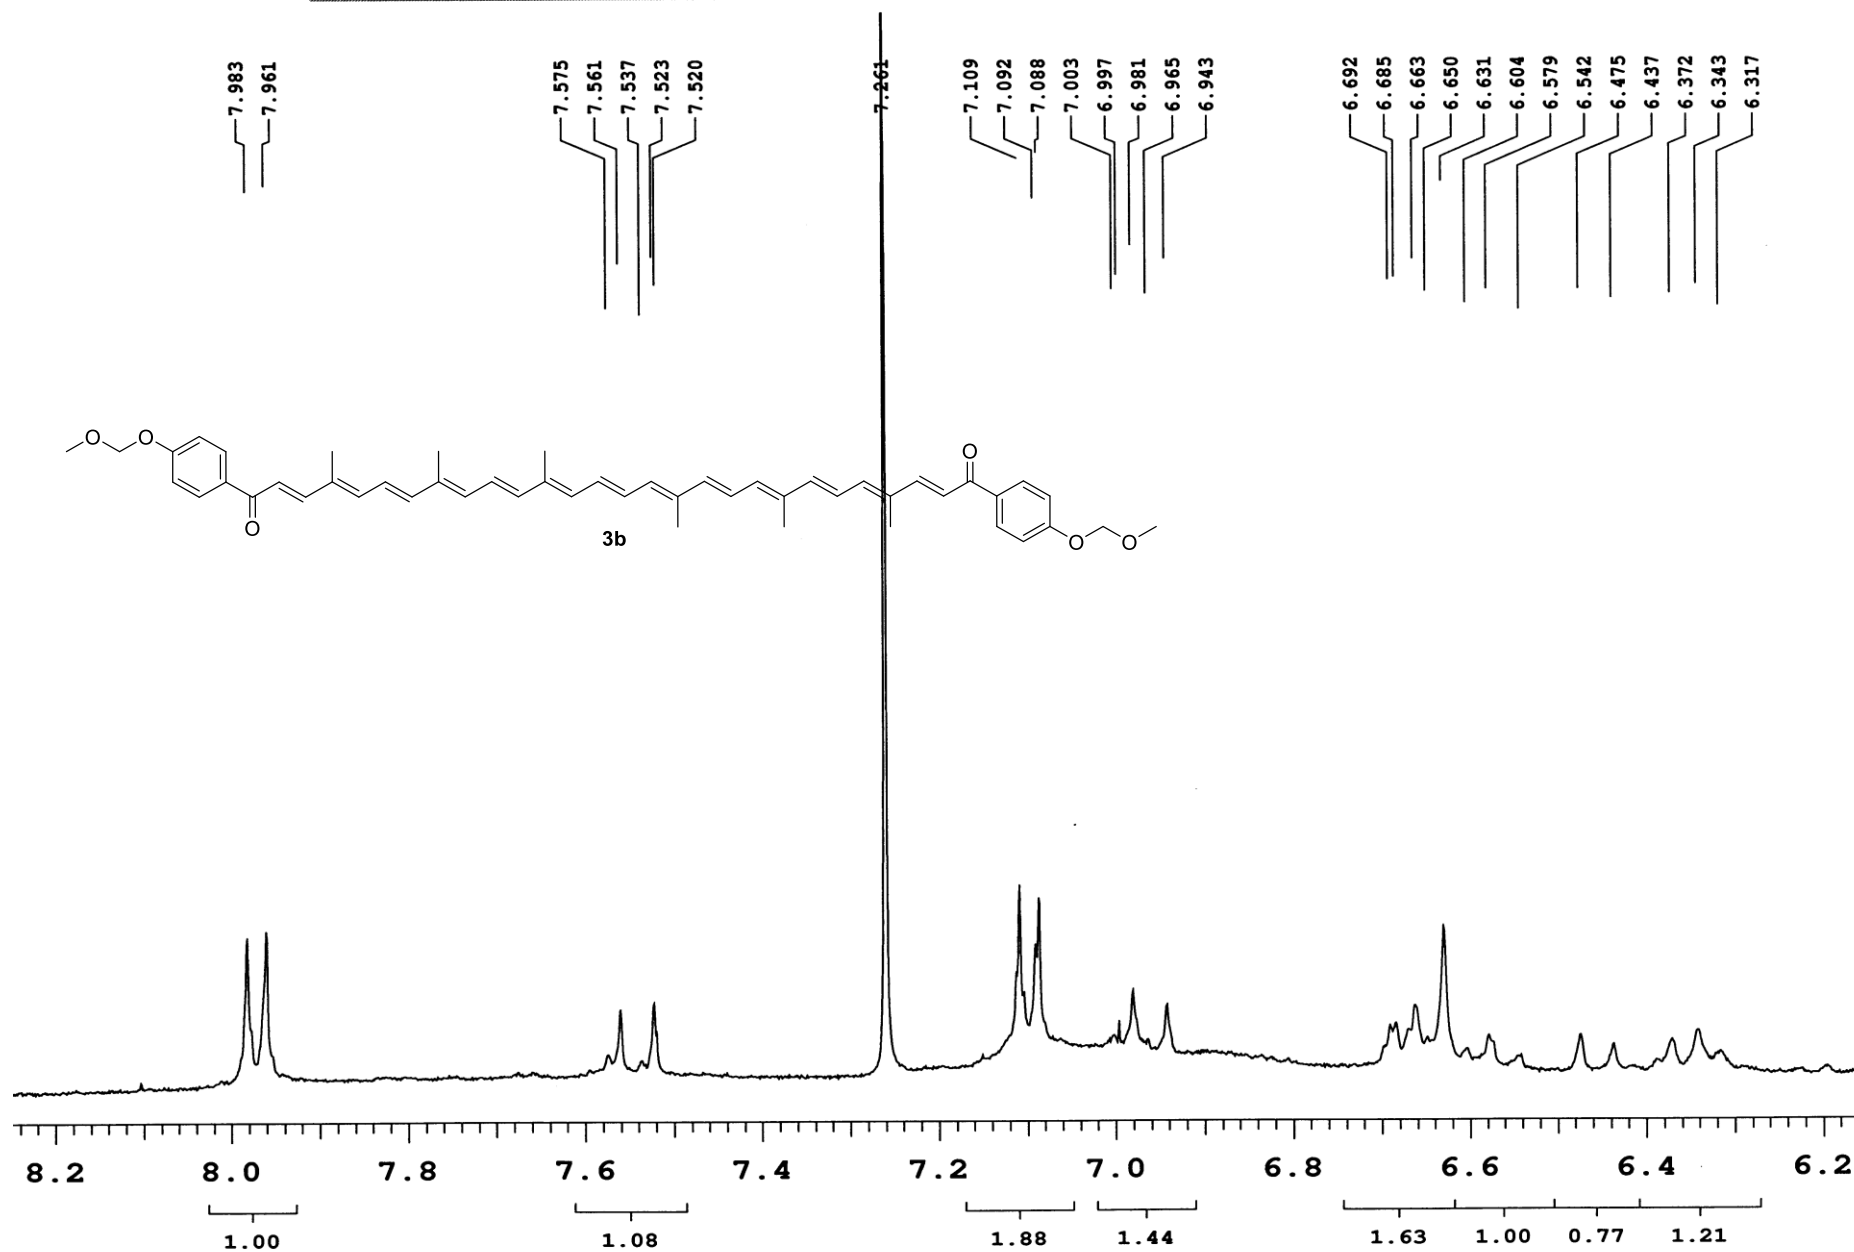

| Parameter              | Value                                                                        |
|------------------------|------------------------------------------------------------------------------|
| Data File Name         | D:/ NMR-SHK/ 2201-koo-4-04/ SGS-2039-1re_01/ SGS-2039-1re_PROTON_01.fid/ fid |
| Title                  | SGS-2039-1re_PROTON_01                                                       |
| Instrument             | vnmrs                                                                        |
| Solvent                | cdcl3                                                                        |
| Probe                  | 5mm_ATB                                                                      |
| Acquisition Date       | 2022-01-04T10:22:29                                                          |
| Spectrometer Frequency | 400.04                                                                       |

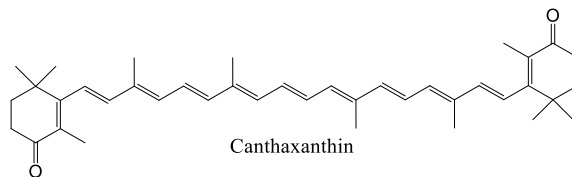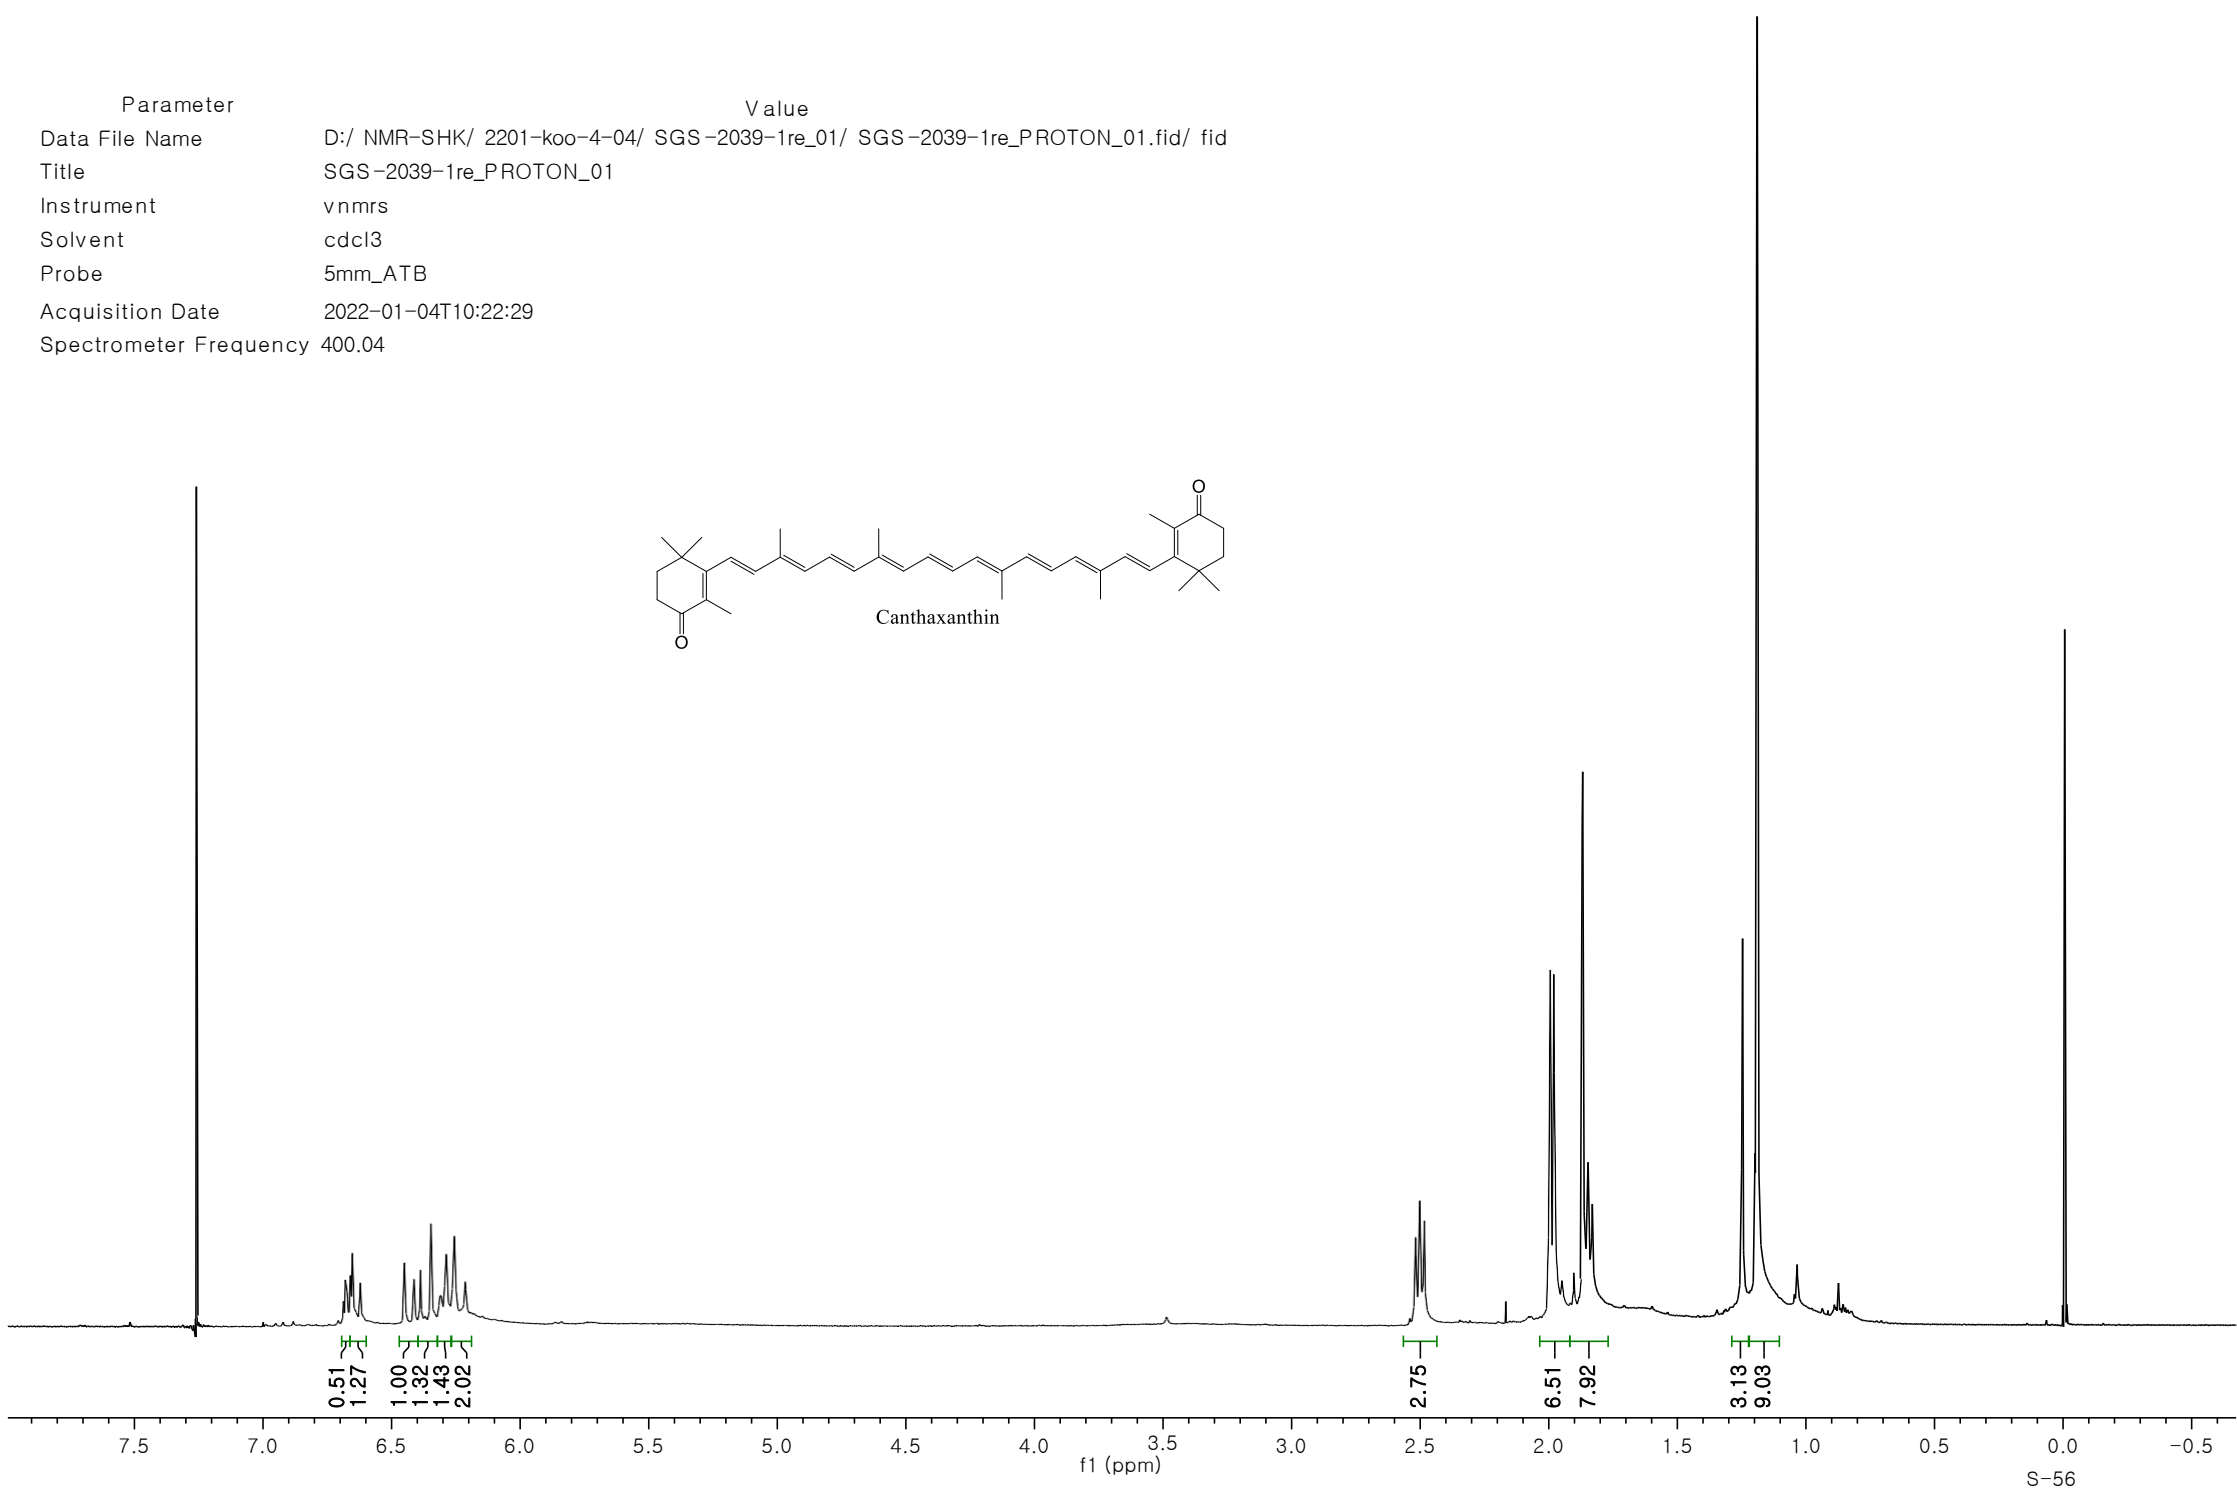

| Parameter              | Value                                                                        |
|------------------------|------------------------------------------------------------------------------|
| Data File Name         | D:/ NMR-SHK/ 2201-koo-4-04/ SGS-2039-1re_01/ SGS-2039-1re_PROTON_01.fid/ fid |
| Title                  | SGS-2039-1re_PROTON_01                                                       |
| Instrument             | vnmr5                                                                        |
| Solvent                | cdcl3                                                                        |
| Probe                  | 5mm_ATB                                                                      |
| Acquisition Date       | 2022-01-04T10:22:29                                                          |
| Spectrometer Frequency | 400.04                                                                       |

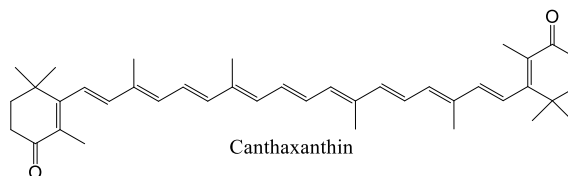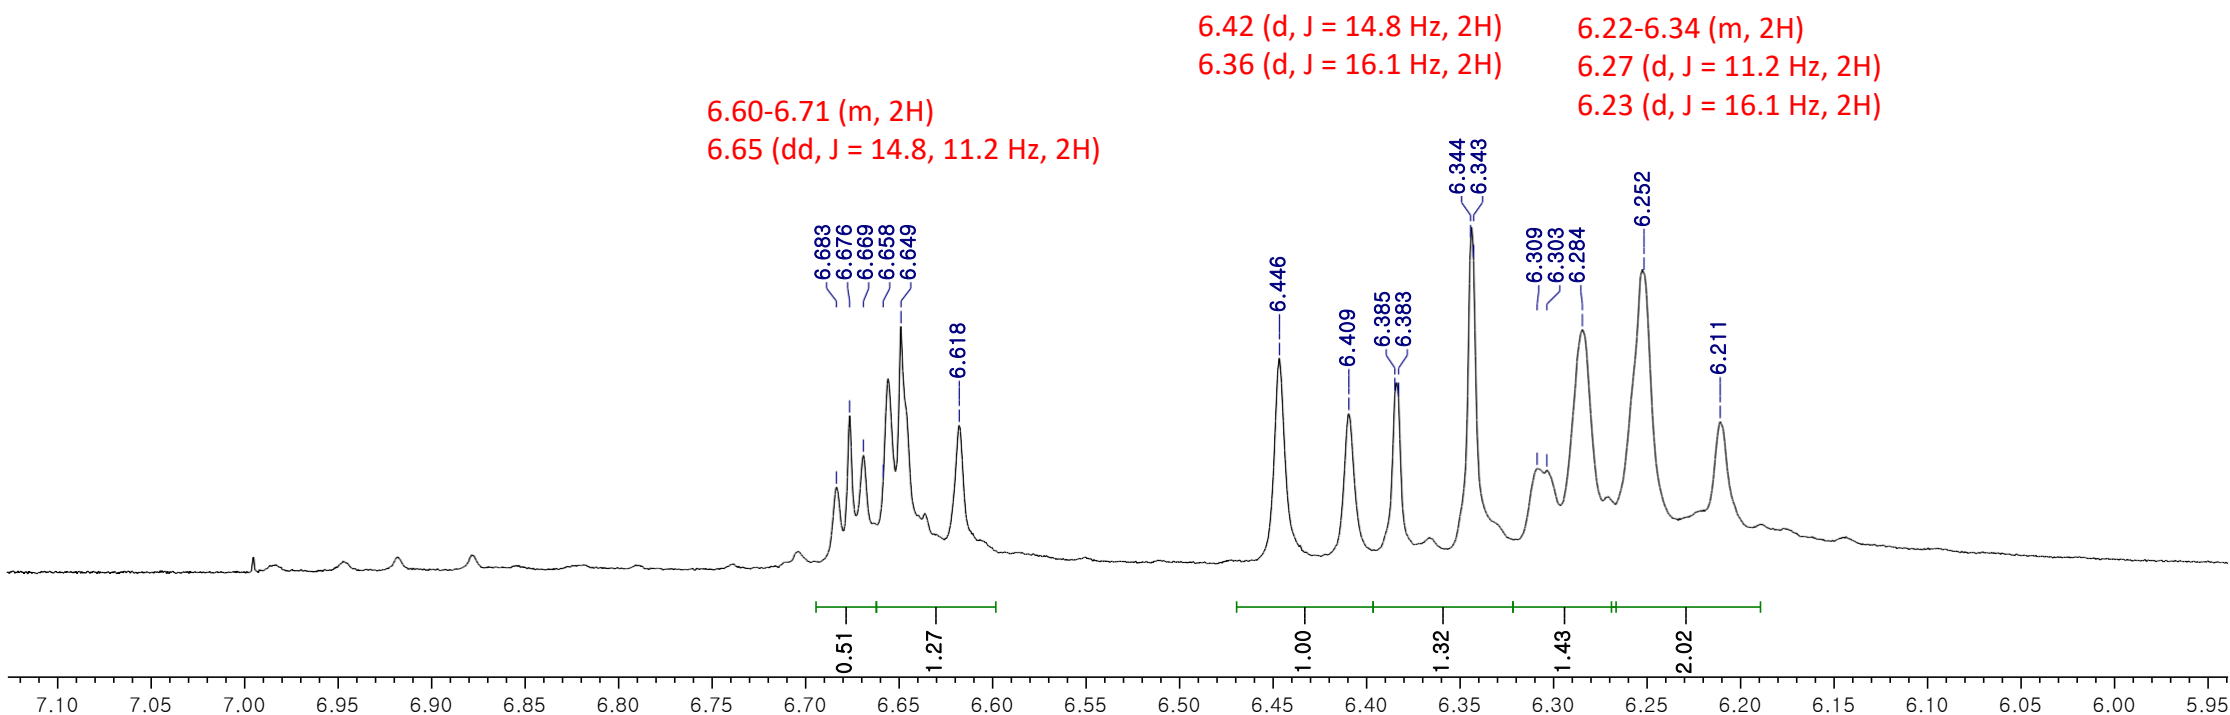

| Parameter              | Value                                                                        |
|------------------------|------------------------------------------------------------------------------|
| Data File Name         | D:/ NMR-SHK/ 2201-koo-4-05/ SGS-2039-1re_01/ SGS-2039-1re_CARBON_01.fid/ fid |
| Title                  | SGS-2039-1re_CARBON_01                                                       |
| Instrument             | vnmrs                                                                        |
| Solvent                | cdcl3                                                                        |
| Probe                  | 5mm_ATB                                                                      |
| Acquisition Date       | 2022-01-05T13:35:39                                                          |
| Spectrometer Frequency | 100.60                                                                       |

$^{13}\text{C}$  NMR (101 MHz,  $\text{cdcl}_3$ )  $\delta$  199.39, 161.30, 141.36, 139.28, 136.67, 134.79, 134.46, 133.58, 130.55, 129.73, 124.68, 124.08, 37.37, 35.74, 34.28, 29.70, 27.69, 13.89, 12.83, 12.62, 0.00.

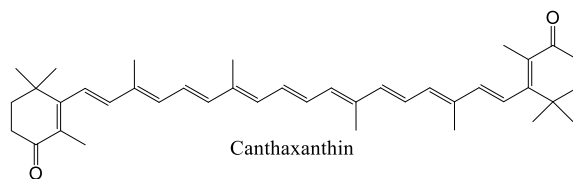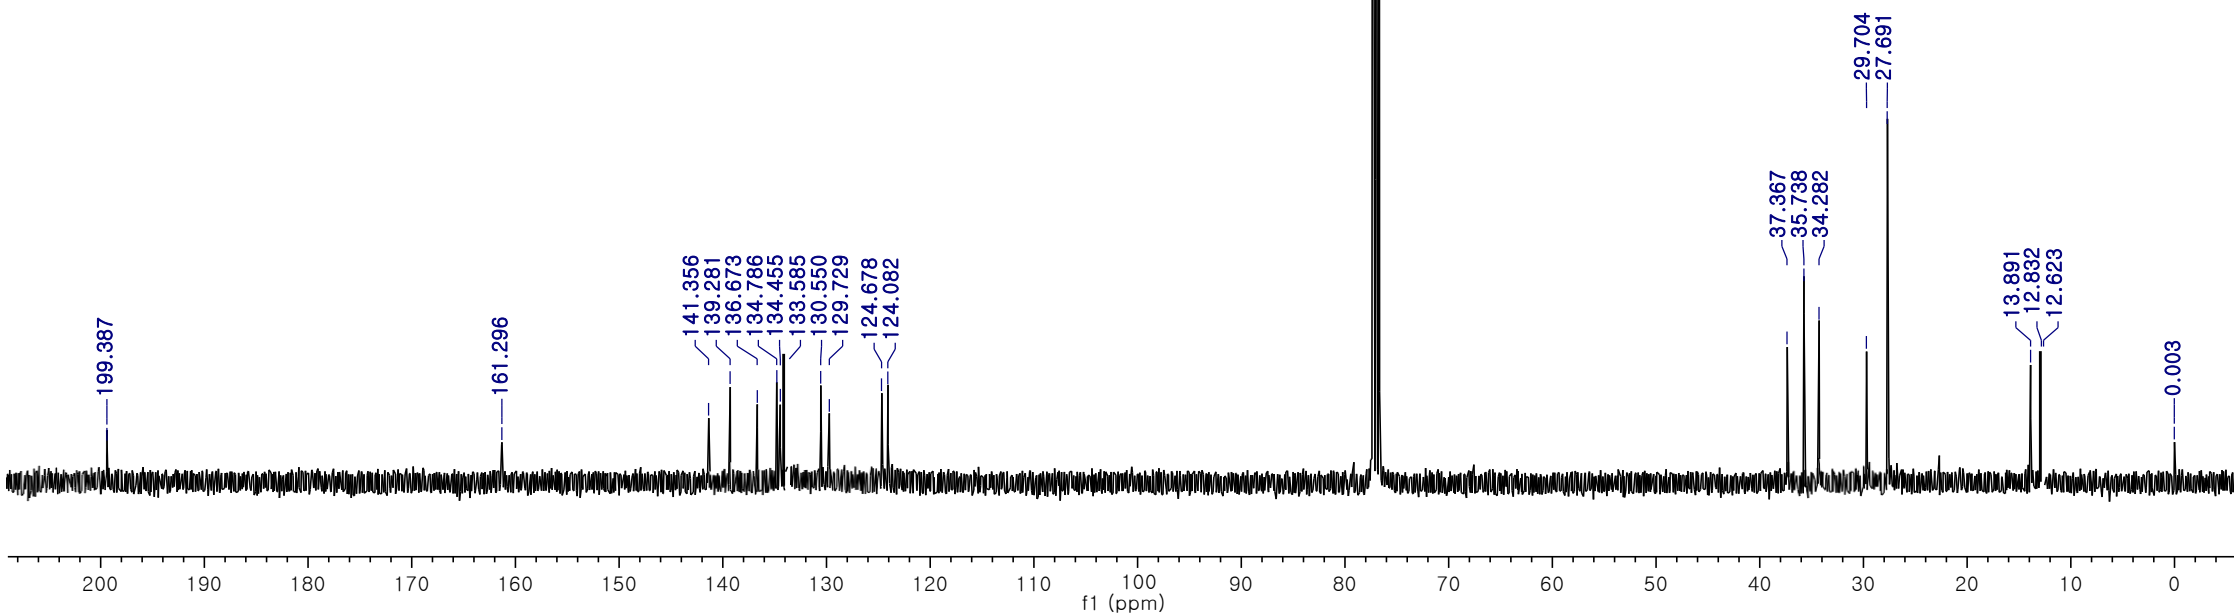

## (2) Assignment of *E*-stereochemistry for **4** by N.O.E.

SGS-2207-2

Sample Name **SGS-2207-2**  
Date collected **2022-06-20**

Pulse sequence **PROTON**  
Solvent **cdcl3**

Temperature **20**  
Spectrometer **Agilent-NMR.chem.com-vnmrs400**  
Study owner **vnmr1**  
Operator **vnmr1**

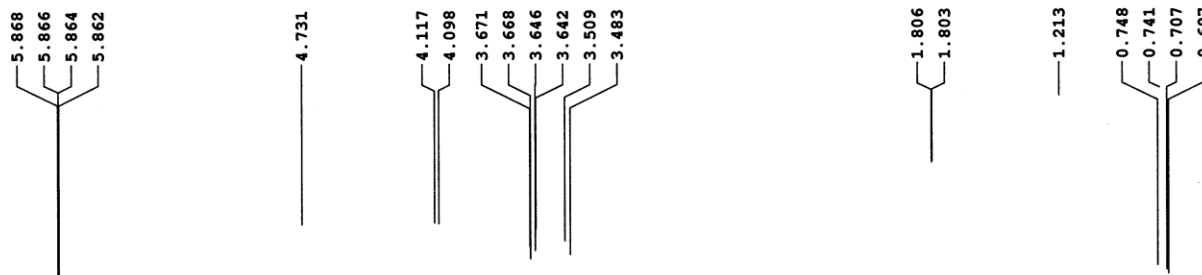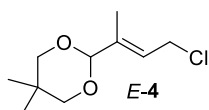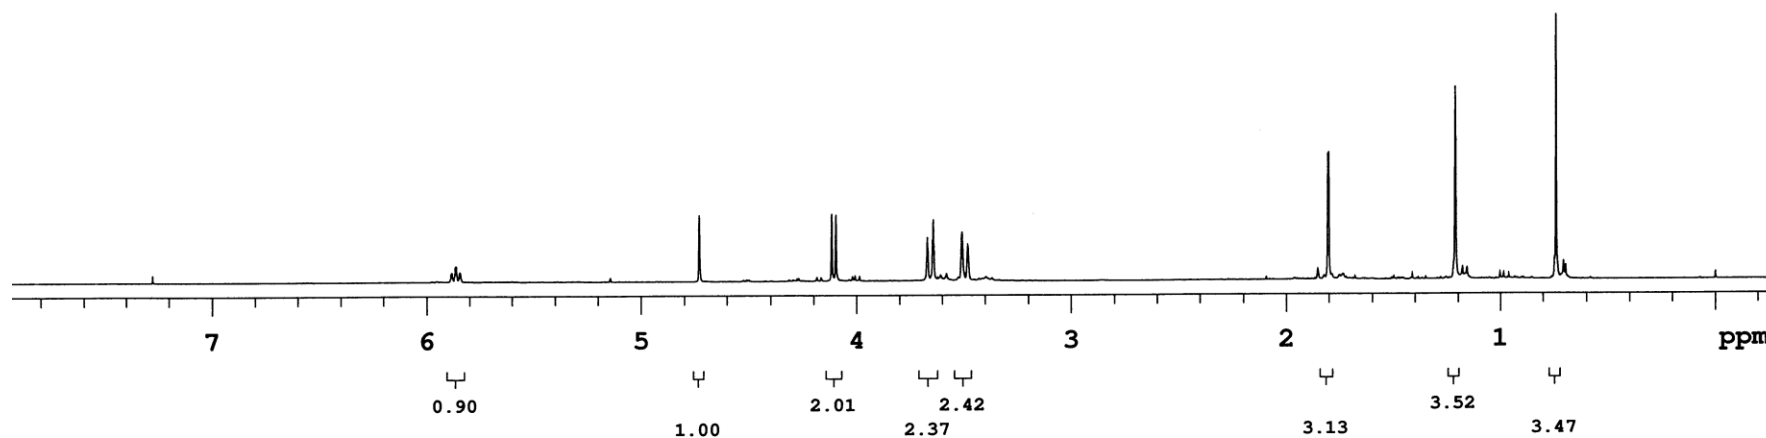

SGS-2207-2

Sample Name **SGS-2207-2**  
Date collected **2022-06-21**

Pulse sequence **gCOSY**  
Solvent **cdcl3**

Temperature **20**  
Spectrometer **Agilent-NMR.chem.com-vnmrs400**  
Study owner **vnmr1**  
Operator **vnmr1**

# COSY for *E*-4

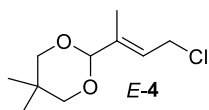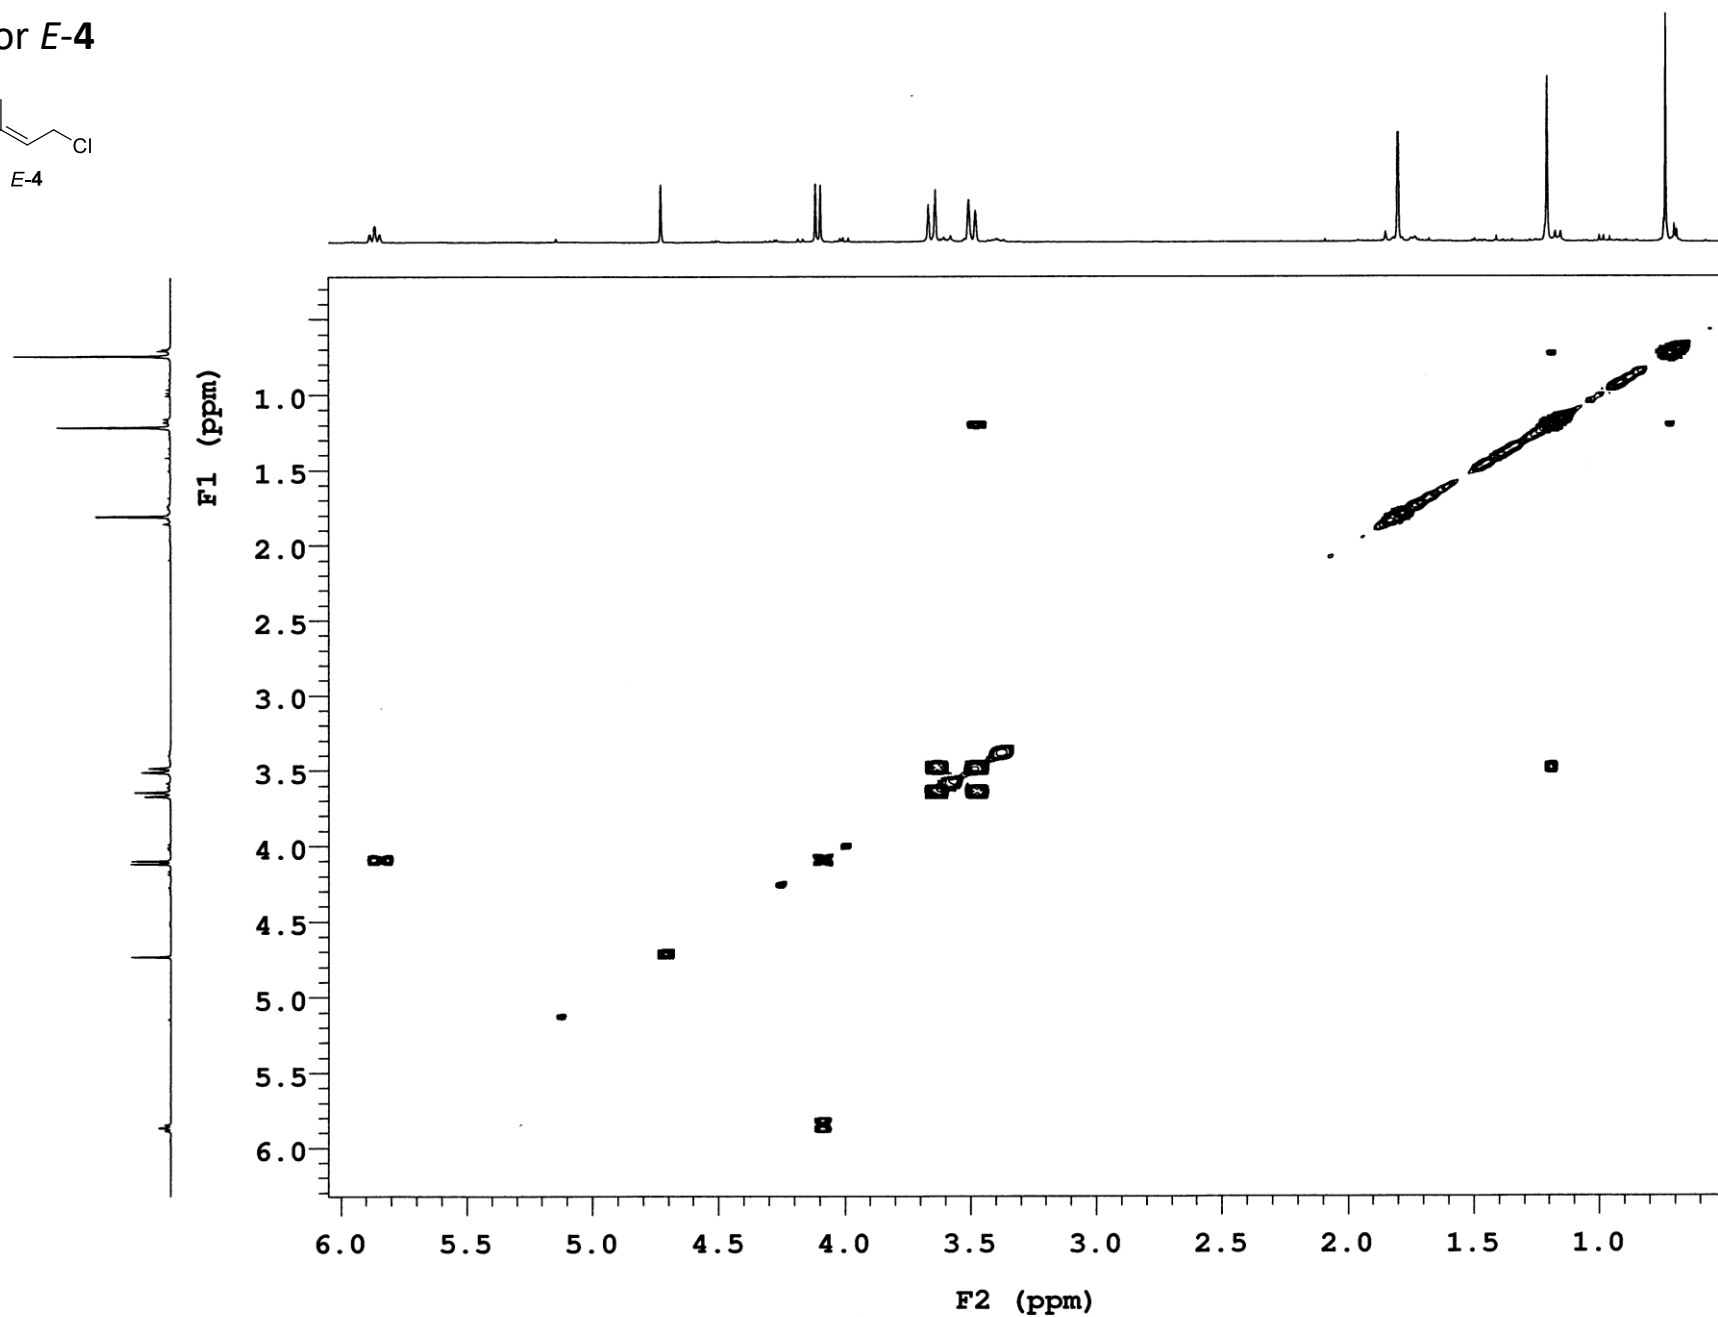



SGS-2207-2

Sample Name **SGS-2207-2**  
Date collected **2022-06-21**

Pulse sequence **NOESY**  
Solvent **cdcl3**

Temperature **20**  
Spectrometer **Agilent-NMR.chem.com-vnmrs400**

Study owner **vnmr1**  
Operator **vnmr1**

# NOSEY for *E*-4

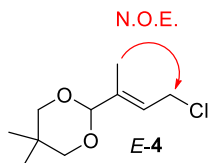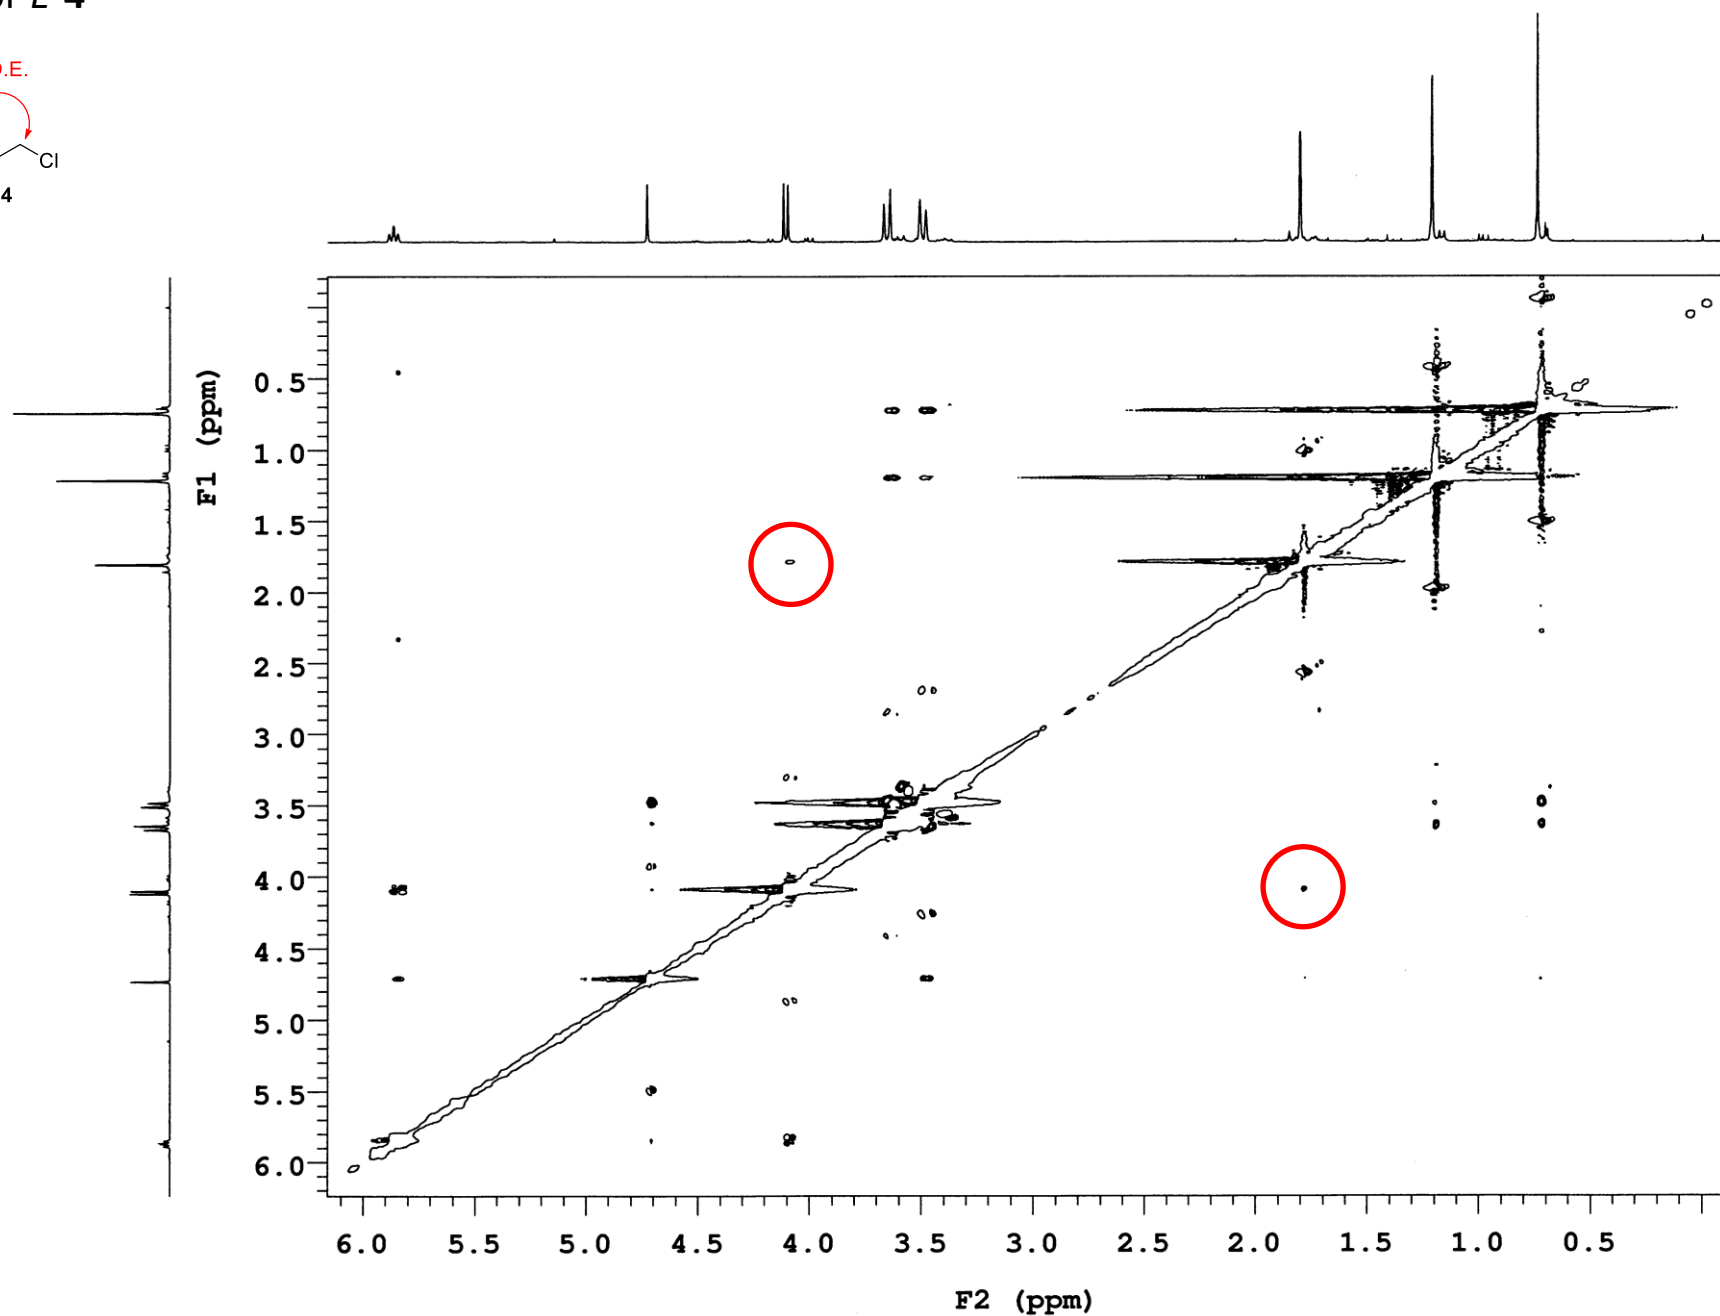

# 1D N.O.E. of *E*-4

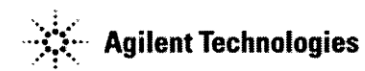

Sample Name:  
SGS-2207-2  
Data Collected on:  
Agilent-NMR.chem.com-vnmrs400  
Archive directory:  
/home/vnmr1/vnmrsys/data/2206-koo-4  
Sample directory:  
SGS-2207-2\_01  
FidFile: SGS-2207-2\_PROTON\_01

Pulse Sequence: PROTON (s2pul)  
Solvent: cdcl3  
Data collected on: Jun 22 2022

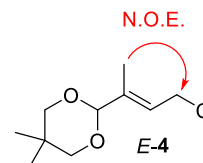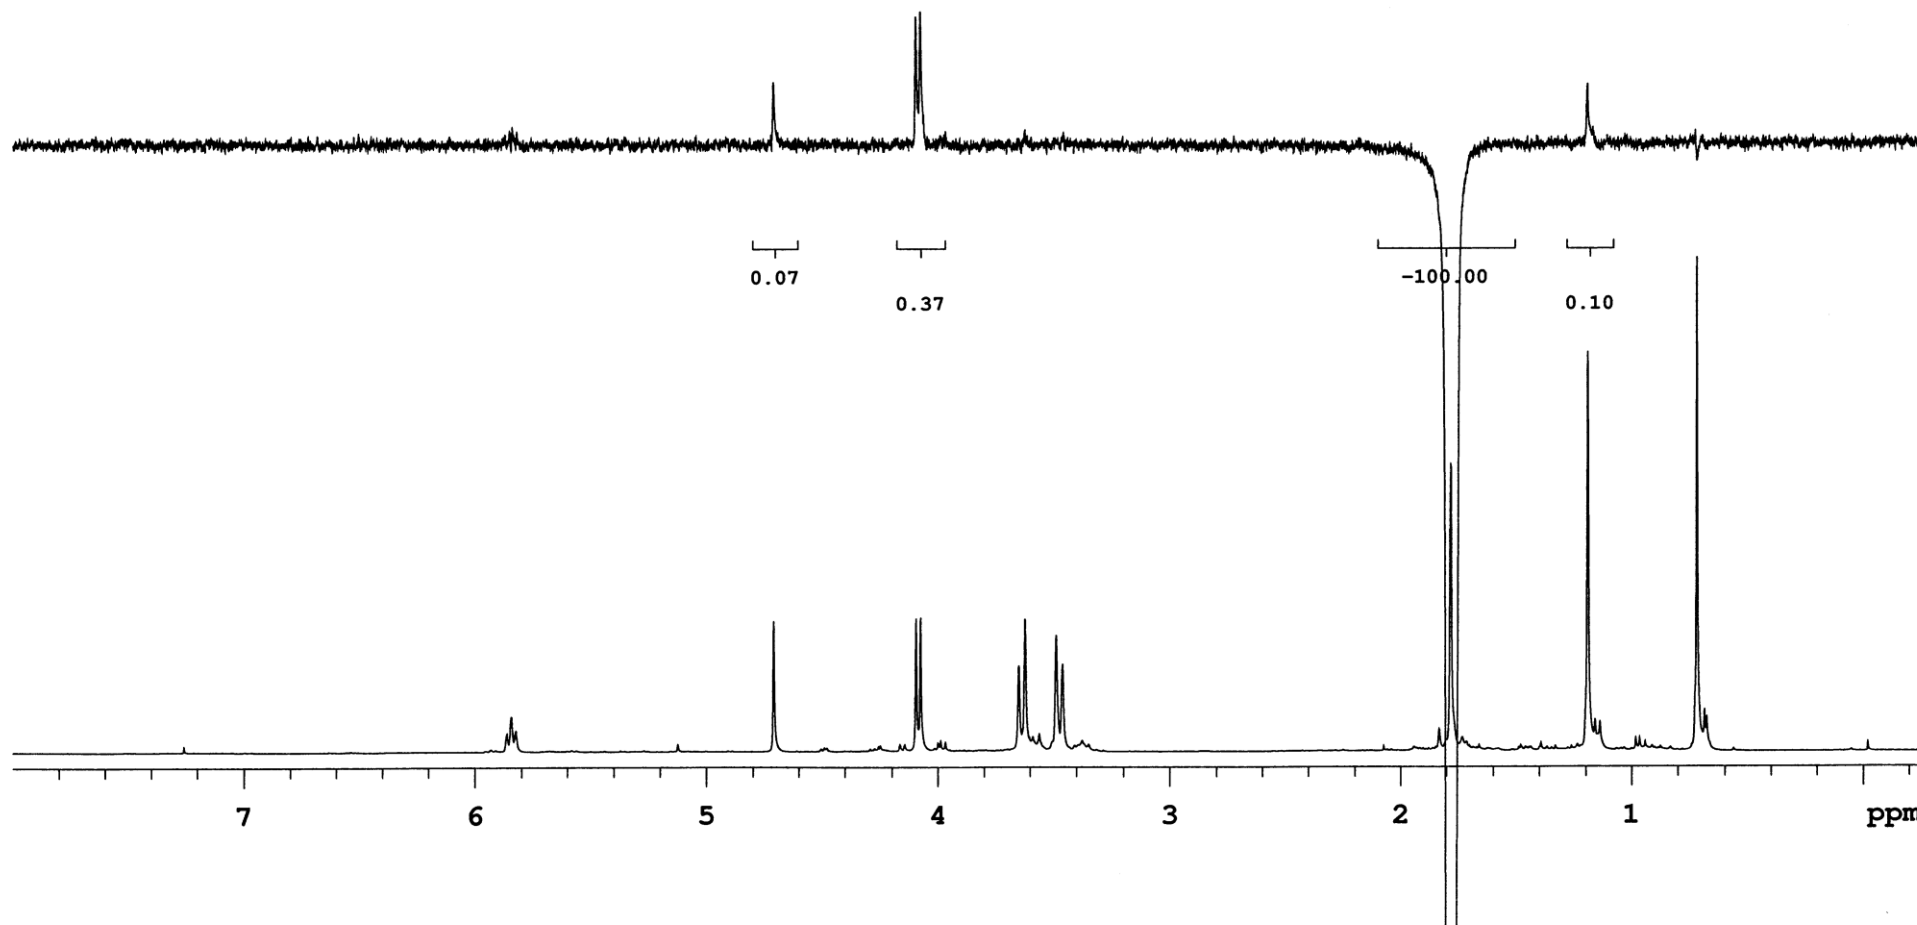

### (3) Peak assignment for **2b** by COSY, HMBC, and DEPT

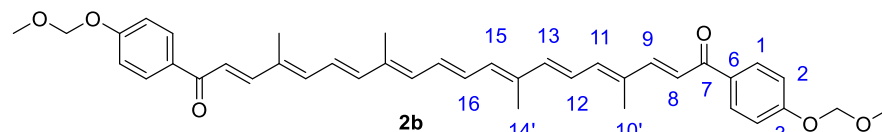

| Numbering                 | <sup>1</sup> H NMR |                   | <sup>13</sup> C NMR |                 |
|---------------------------|--------------------|-------------------|---------------------|-----------------|
|                           | Shift (ppm)        | Multiplicity (Hz) | Shift (ppm)         | DEPT            |
| <b>1</b>                  | 7.97               | d (8.8)           | 130.5               | CH              |
| <b>2</b>                  | 7.10               | d (8.8)           | 115.7               | CH              |
| <b>3</b>                  | -                  | -                 | 160.7               | C               |
| <b>3-OCH<sub>2</sub>O</b> | 5.25               | s                 | 94.1                | CH <sub>2</sub> |
| <b>3-OMe</b>              | 3.50               | s                 | 56.2                | CH <sub>3</sub> |
| <b>6</b>                  | -                  | -                 | 132.5               | C               |
| <b>7</b>                  | -                  | -                 | 188.9               | C               |
| <b>8</b>                  | 6.97               | d (15.2)          | 120.2               | CH              |
| <b>9</b>                  | 7.54               | d (15.2)          | 148.6               | CH              |
| <b>10</b>                 | -                  | -                 | 134.3               | C               |
| <b>10'(Me)</b>            | 2.06               | s                 | 12.9                | CH <sub>3</sub> |
| <b>11</b>                 | 6.62               | d (11.2)          | 140.8               | CH              |
| <b>12</b>                 | 6.69               | dd (14.4, 11.2)   | 124.7               | CH              |
| <b>13</b>                 | 6.55               | d (14.4)          | 142.0               | CH              |
| <b>14</b>                 | -                  | -                 | 137.0               | C               |
| <b>14'(Me)</b>            | 2.01               | s                 | 12.8                | CH <sub>3</sub> |
| <b>15</b>                 | 6.33-6.43          | m                 | 135.1               | CH              |
| <b>16</b>                 | 6.66-6.76          | m                 | 131.3               | CH              |

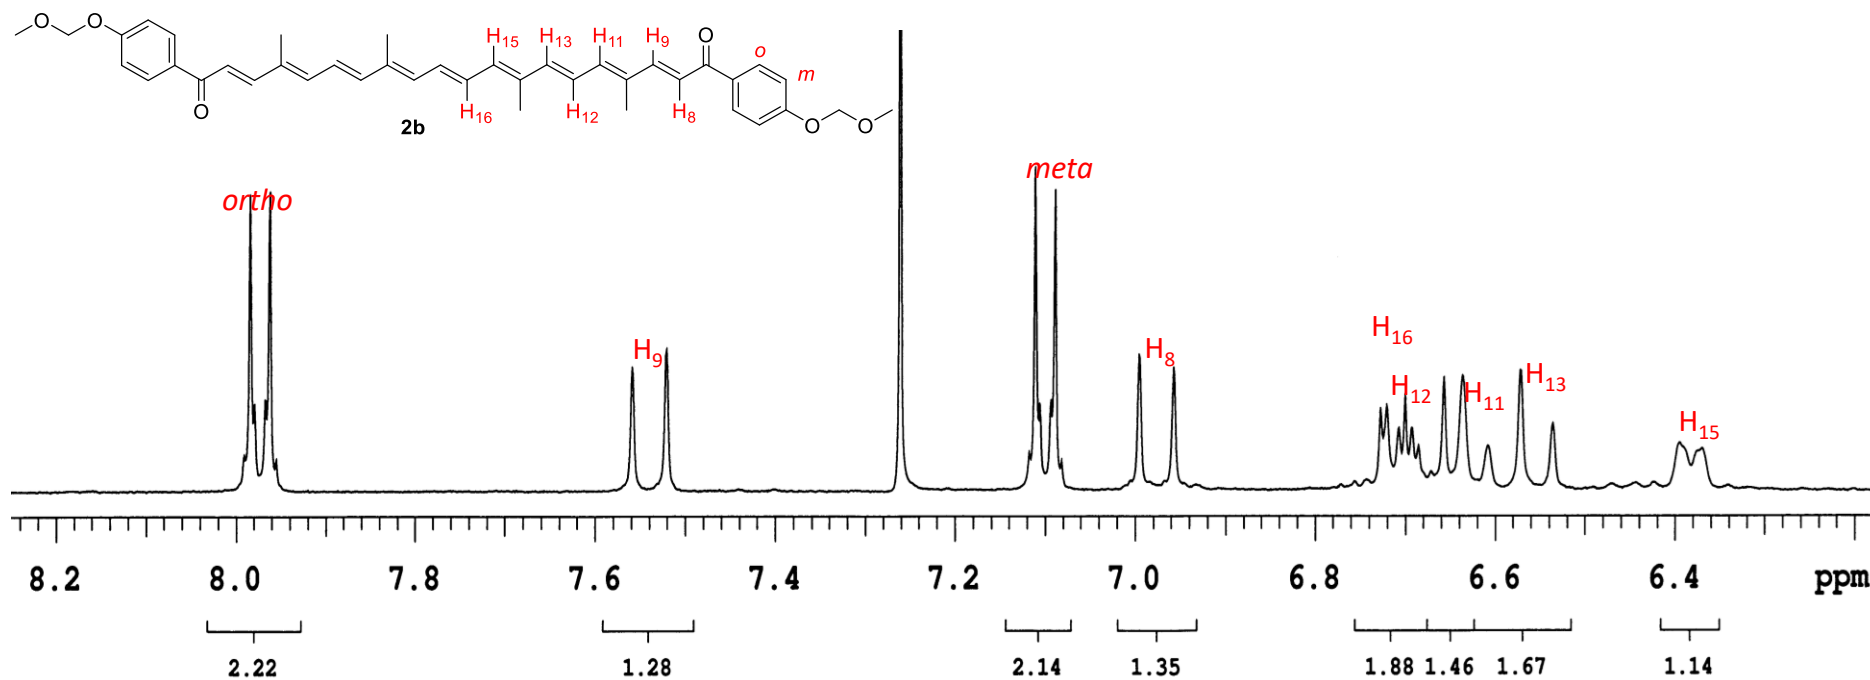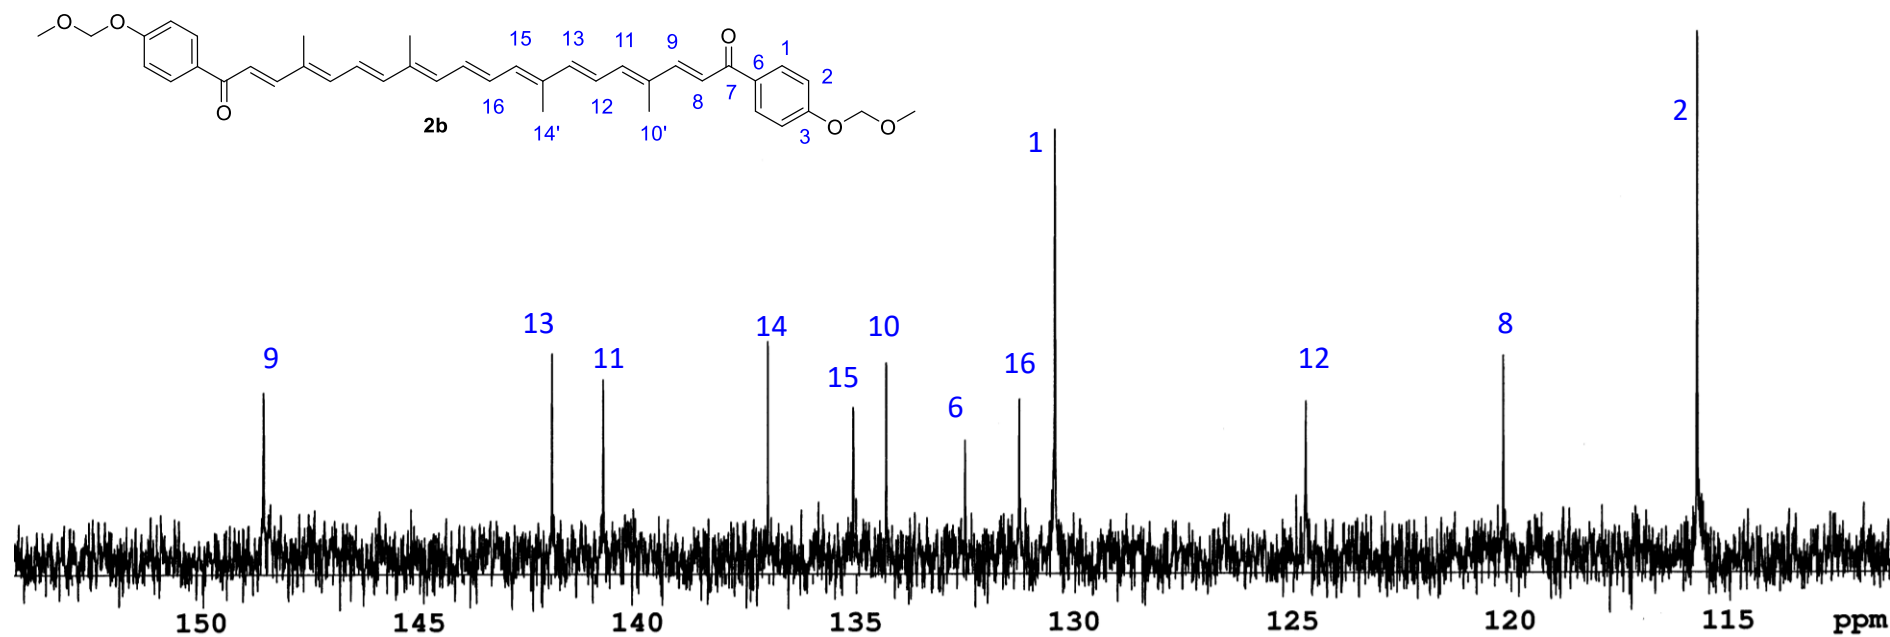

# COSY for 2b

Sample Name:  
SGS-1586-3re-2D\_NMR  
Data Collected on:  
Agilent-NMR.chem.com-vnmrs400  
Archive directory:  
/home/vnmr1/vnmrsys/data/2206-koo-4-25  
Sample directory:  
SGS-1586-3re-2D\_NMR\_01  
FidFile: SGS-1586-3re-2D\_NMR\_gCOSY\_01

Pulse Sequence: gCOSY  
Solvent: cdcl3  
Data collected on: Jun 25 2022

Sample #21, Operator: vnmr1

Relax. delay 1.000 sec  
Acq. time 0.150 sec  
Width 3930.8 Hz  
2D Width 3930.8 Hz  
16 repetitions  
512 increments  
OBSERVE H1, 400.0405310 MHz  
DATA PROCESSING  
Sq. sine bell 0.075 sec  
F1 DATA PROCESSING  
Sq. sine bell 0.080 sec  
FT size 4096 x 4096  
Total time 2 hr, 50 min

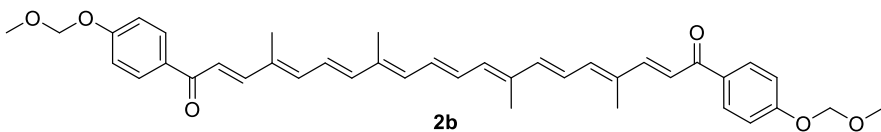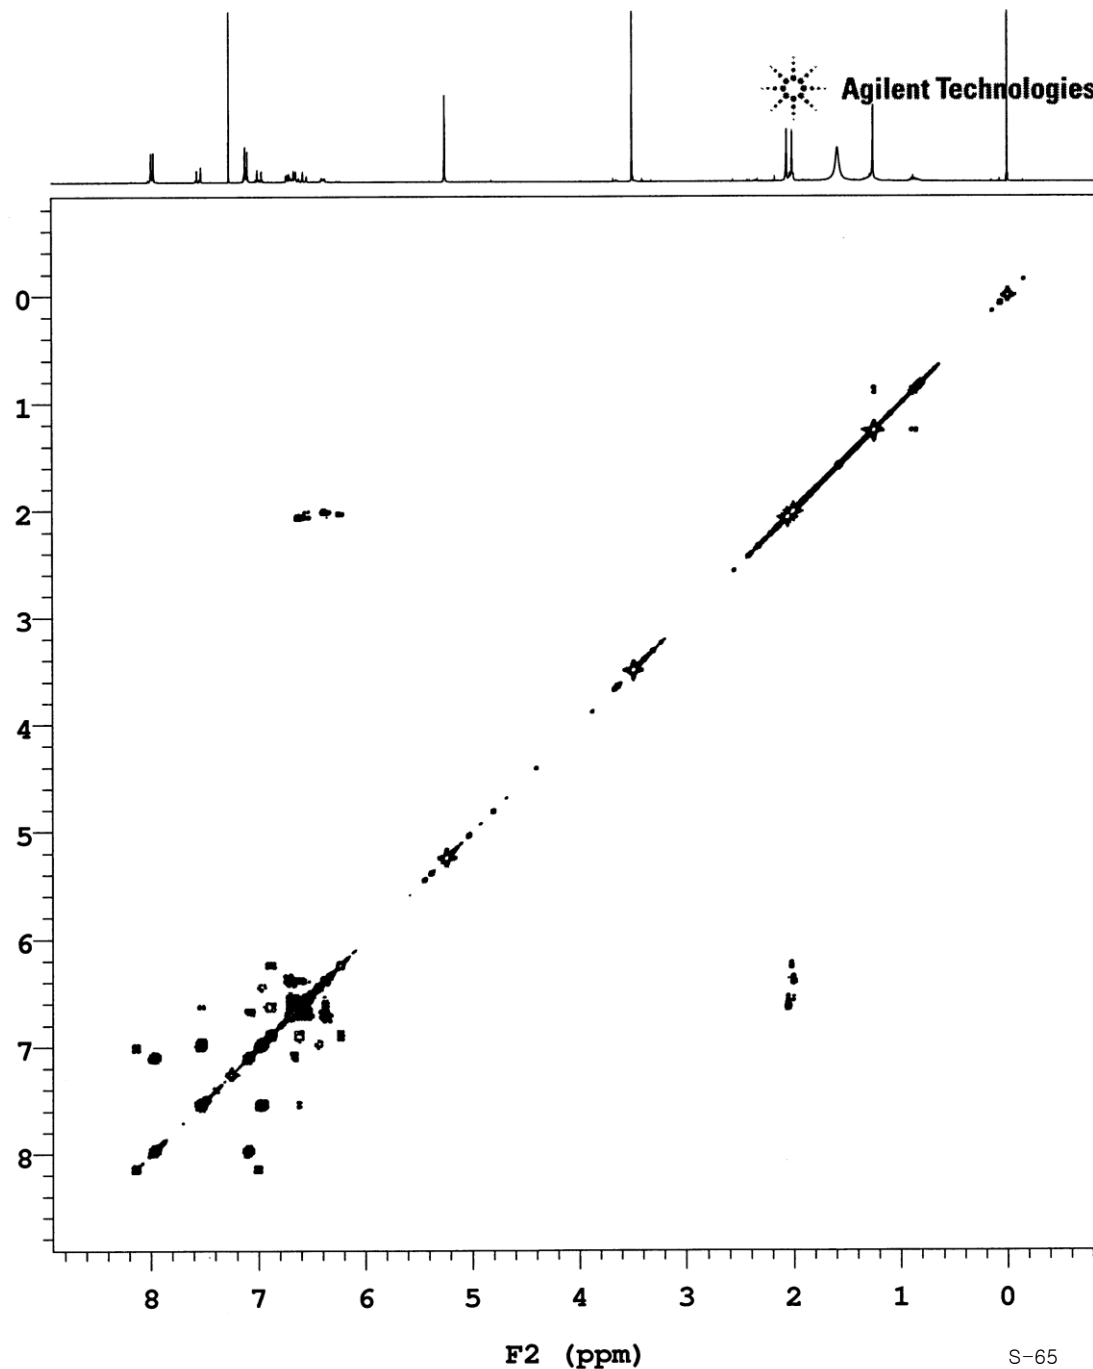

# COSY for 2b

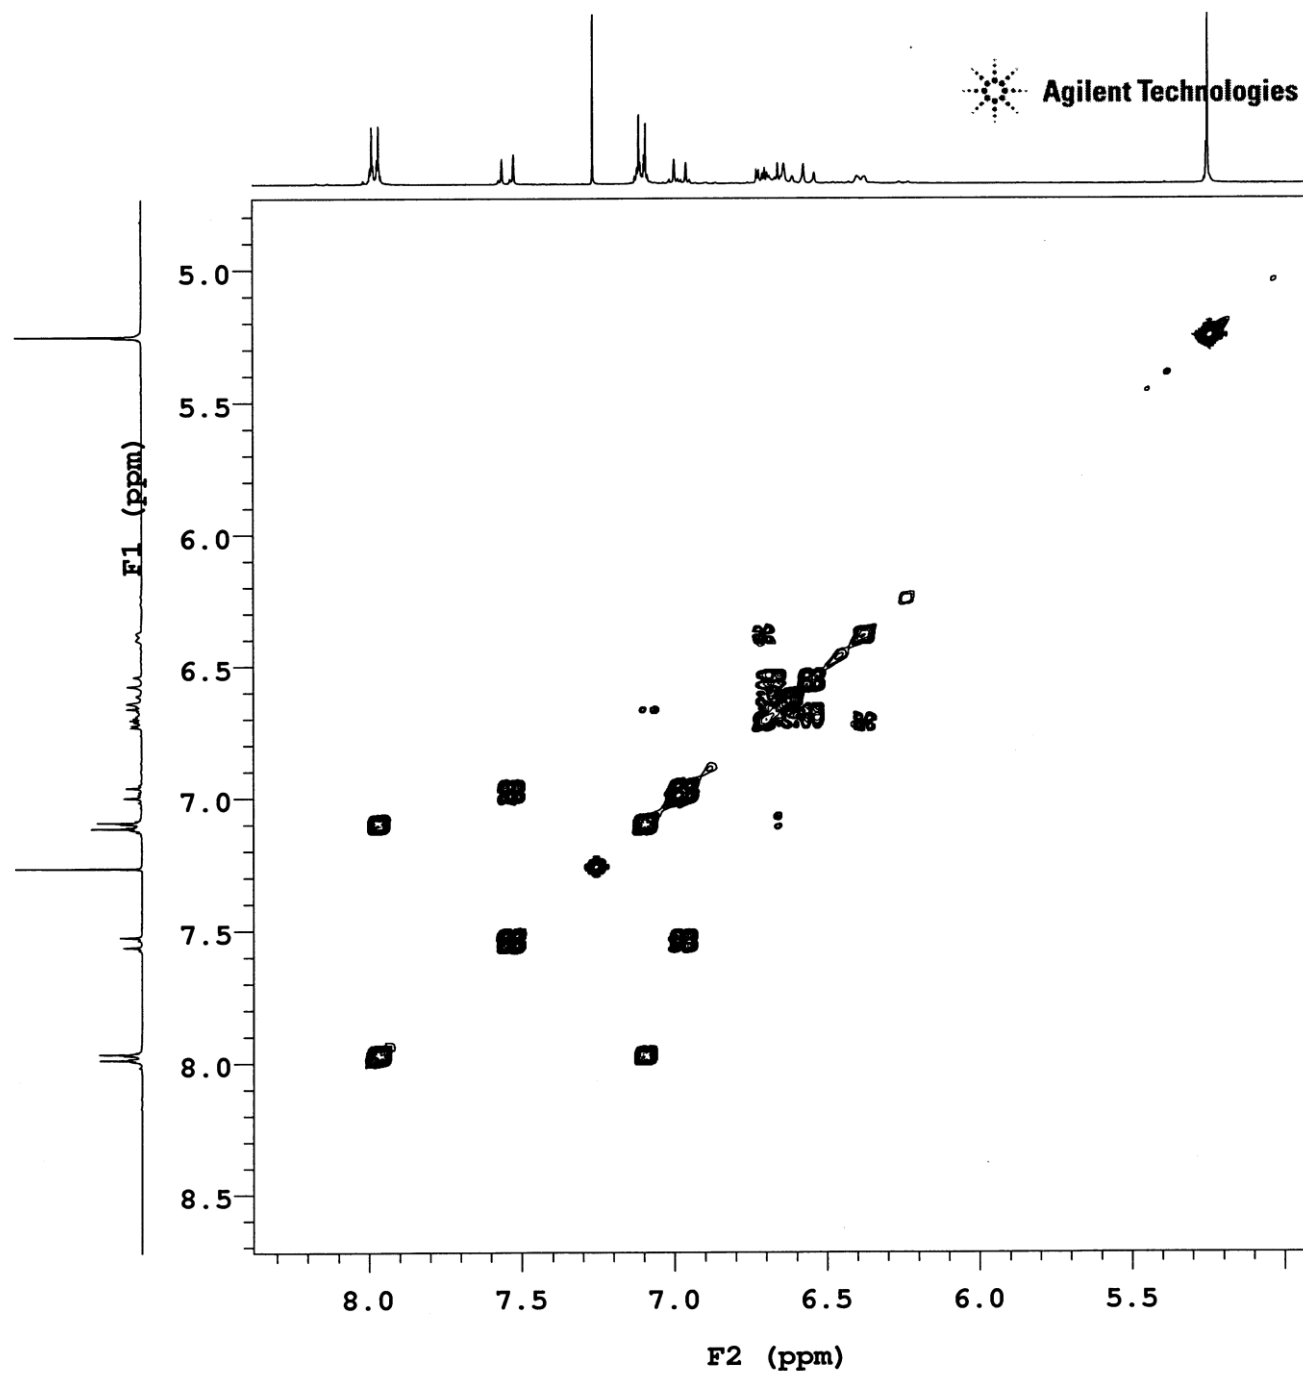

# COSY for 2b

Sample Name:  
SGS-1586-3re-2D\_NMR  
Data Collected on:  
Agilent-NMR.chem.com-vnmrs400  
Archive directory:  
/home/vnmr1/vnmrsys/data/2206-koo-4-25  
Sample directory:  
SGS-1586-3re-2D\_NMR\_01  
FidFile: SGS-1586-3re-2D\_NMR\_gCOSY\_01

Pulse Sequence: gCOSY  
Solvent: cdcl3  
Data collected on: Jun 25 2022

Sample #21, Operator: vnmr1

Relax. delay 1.000 sec  
Acq. time 0.150 sec  
Width 3930.8 Hz  
2D Width 3930.8 Hz  
16 repetitions  
512 increments  
OBSERVE H1, 400.0405310 MHz  
DATA PROCESSING  
Sq. sine bell 0.075 sec  
F1 DATA PROCESSING  
Sq. sine bell 0.080 sec  
FT size 4096 x 4096  
Total time 2 hr, 50 min

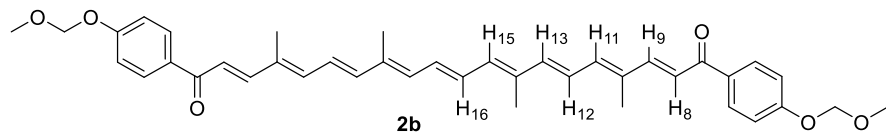

F1 (ppm)

H<sub>15</sub>  
H<sub>13</sub>  
H<sub>11</sub>  
H<sub>12</sub>  
H<sub>16</sub>

6.2  
6.3  
6.4  
6.5  
6.6  
6.7  
6.8  
6.9

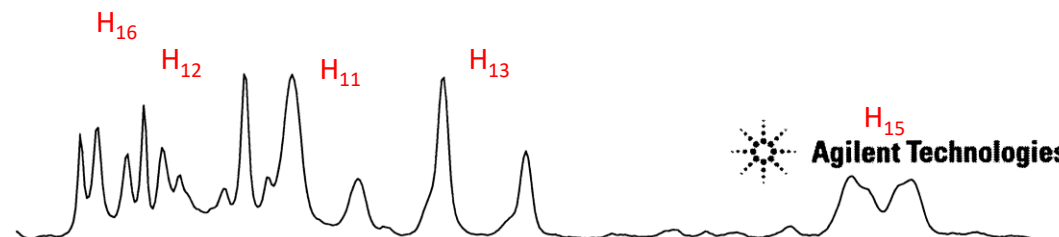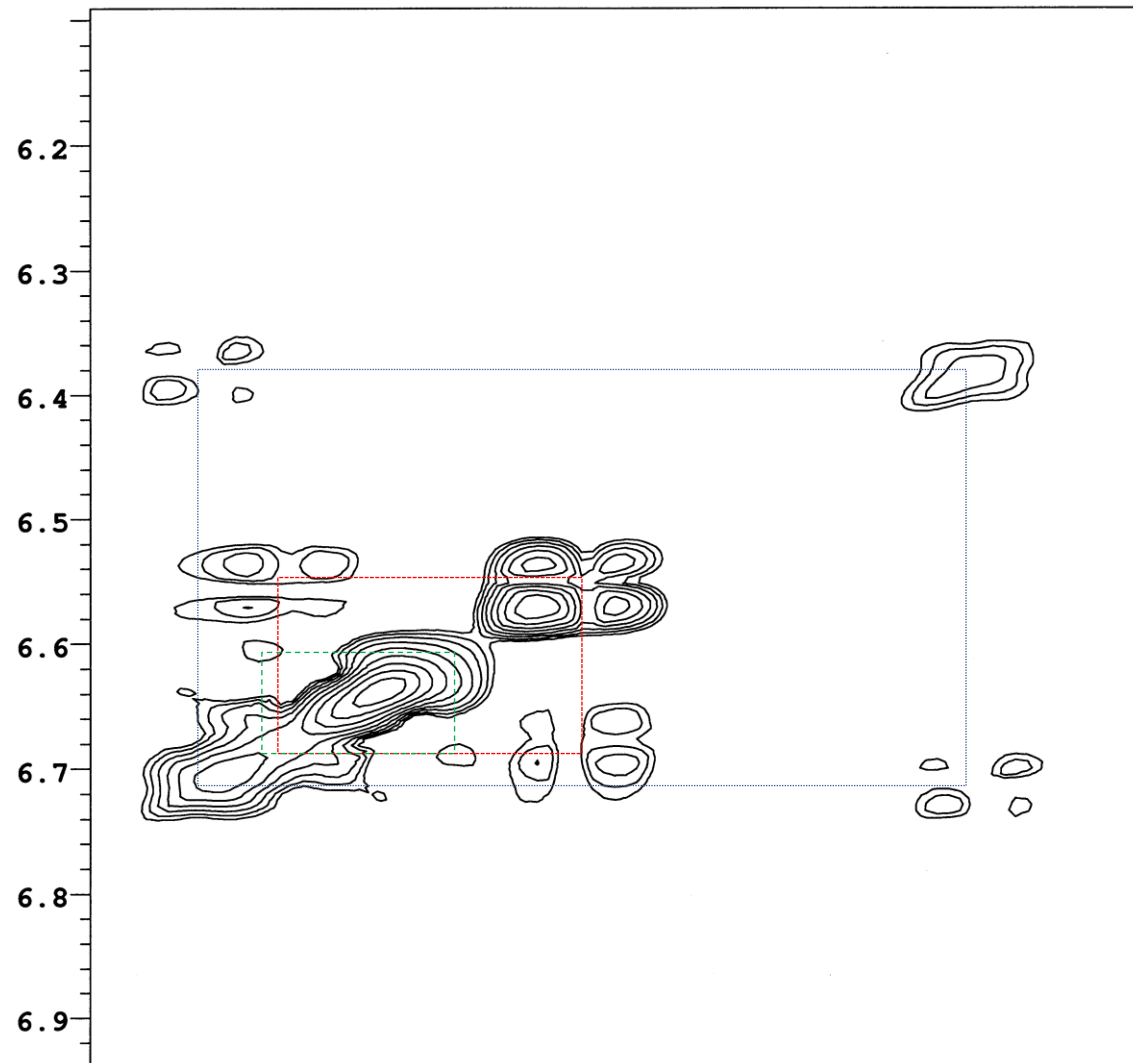

6.7

6.6

6.5

6.4

F2 (ppm)

# NOSEY for 2b

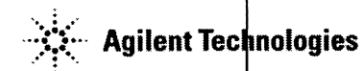

Sample Name:  
SGS-1586-3re-2D\_NMR  
Data Collected on:  
Agilent-NMR.chem.com-vnmrs400  
Archive directory:  
/home/vnmr1/vnmrsys/data/2206-koo-4-25  
Sample directory:  
SGS-1586-3re-2D\_NMR\_01  
FidFile: SGS-1586-3re-2D\_NMR\_NOESY\_01

Pulse Sequence: NOESY  
Solvent: cdcl3  
Data collected on: Jun 25 2022

Sample #21, Operator: vnmr1

Relax. delay 1.000 sec  
Acq. time 0.150 sec  
Width 3930.8 Hz  
2D Width 3930.8 Hz  
16 repetitions  
2 x 512 increments  
OBSERVE H1, 400.0405310 MHz  
DATA PROCESSING  
Gauss apodization 0.069 sec  
F1 DATA PROCESSING  
Gauss apodization 0.074 sec  
FT size 4096 x 4096  
Total time 6 hr, 28 min

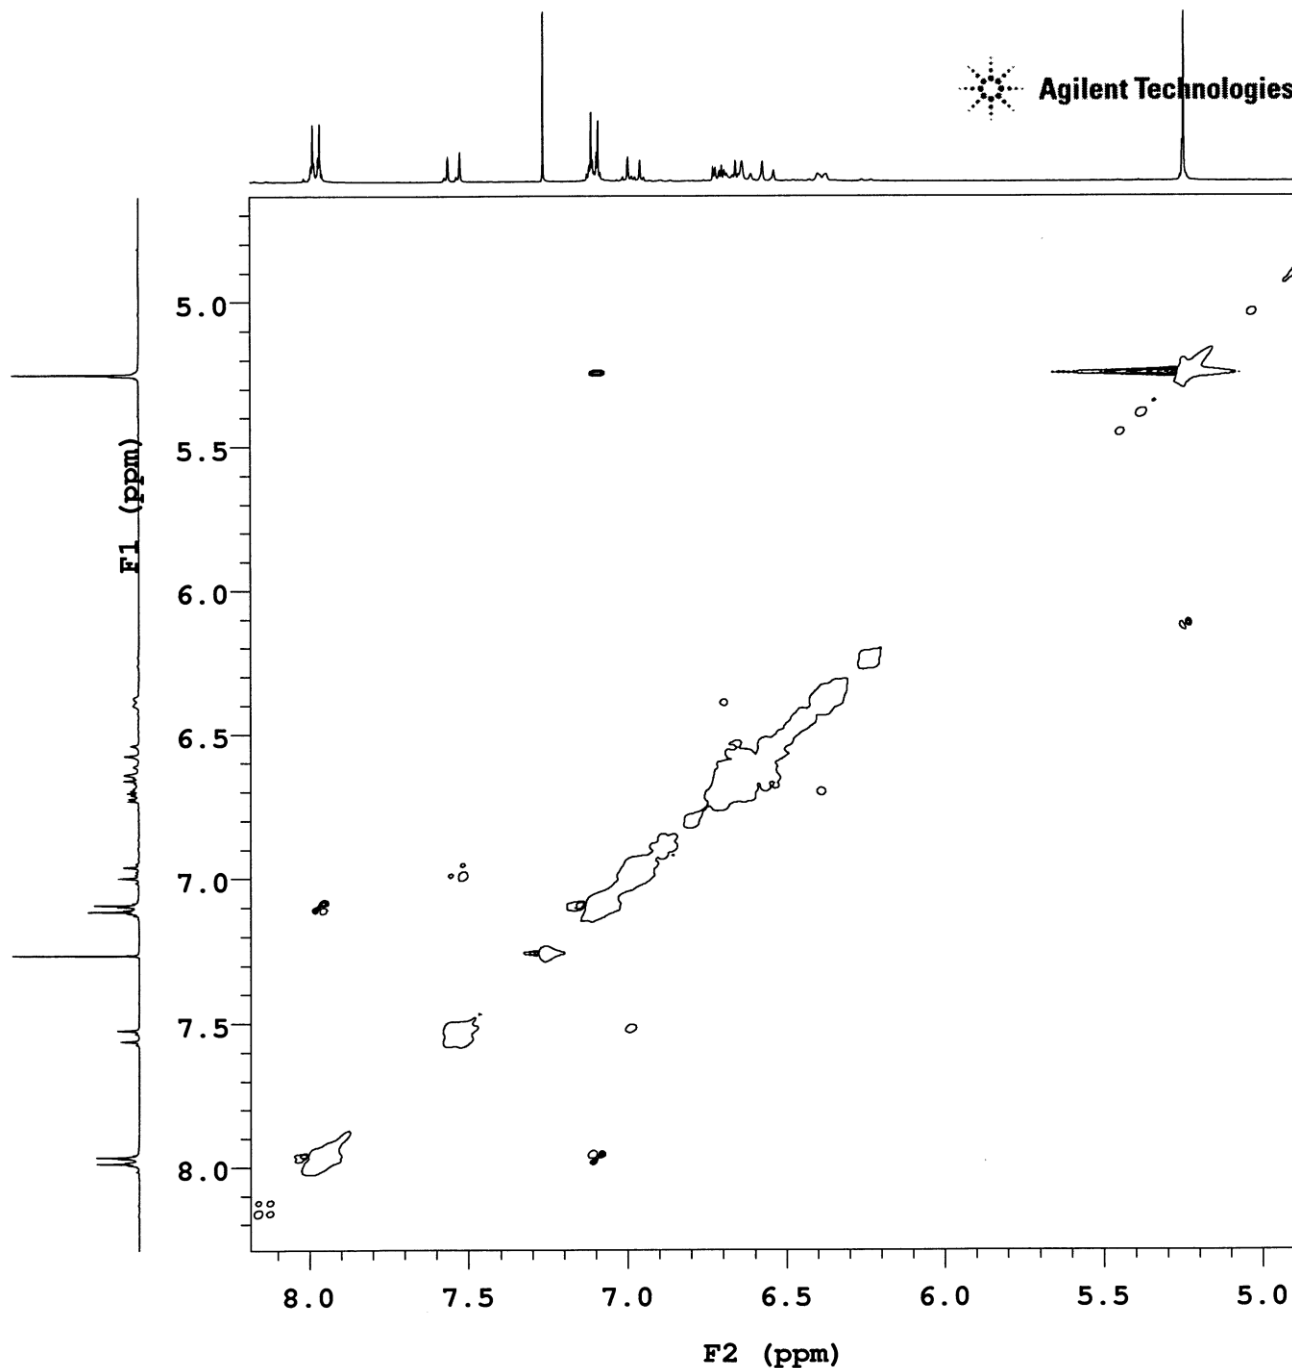



## Comparison of COSY and NOESY for **2b**

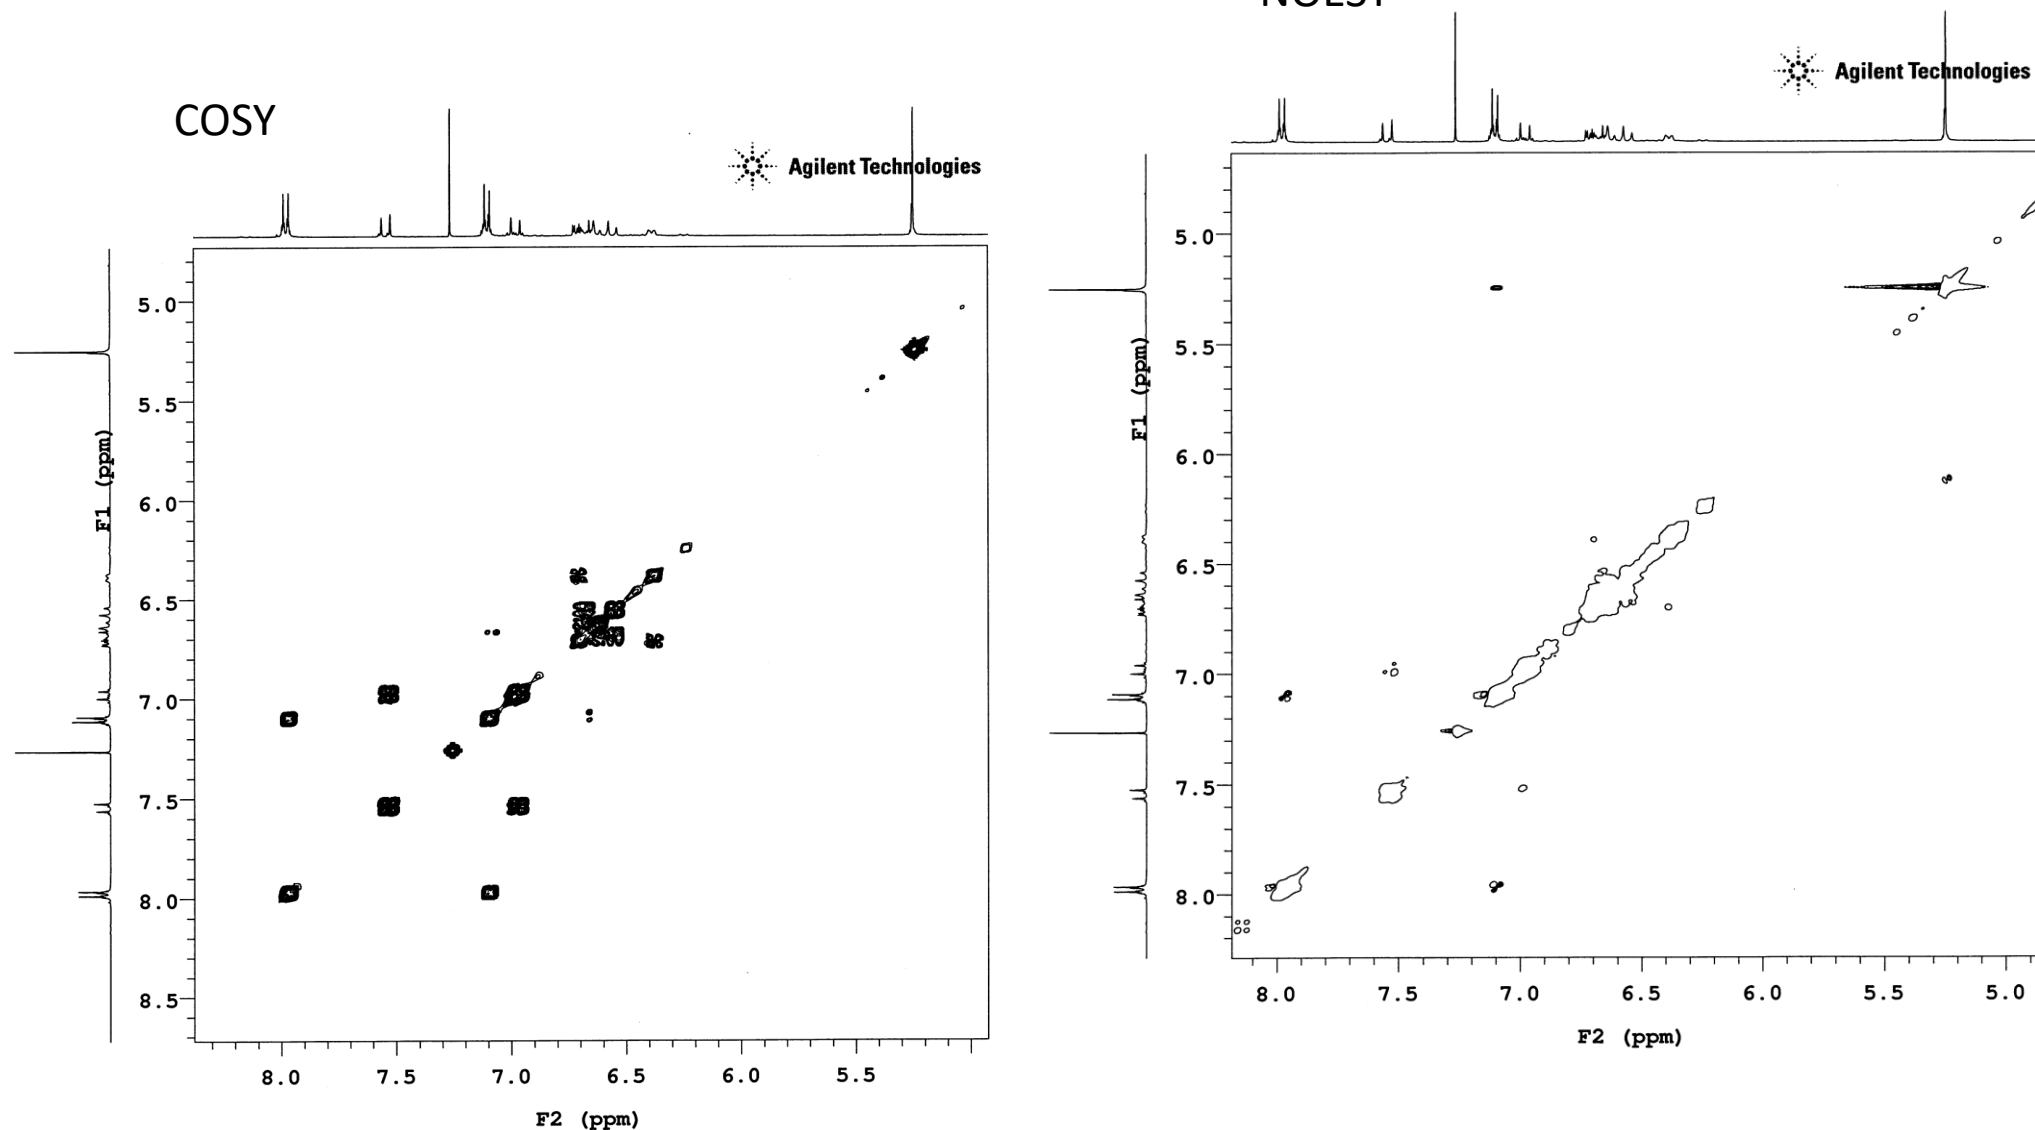

No further correlation in NOESY spectra (compared with COSY) confirmed all-*E* stereochemistry for **2b**

# HMBC for 2b

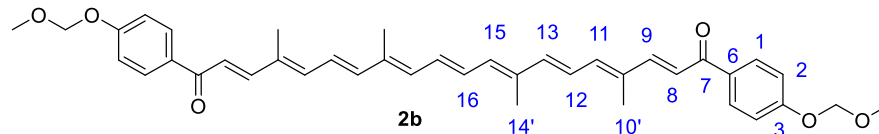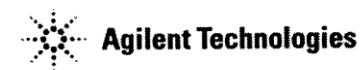

Sample Name:  
SGS-1586-3re-2D\_NMR  
Data Collected on:  
Agilent-NMR.chem.com-vnmrs400  
Archive directory:  
/home/vnmr1/vnmrsys/data/2206-koo-4-25  
Sample directory:  
SGS-1586-3re-2D\_NMR\_01  
FidFile: SGS-1586-3re-2D\_NMR\_gHMBCAD\_01

Pulse Sequence: gHMBCAD  
Solvent: cdcl3  
Data collected on: Jun 25 2022

Sample #21, Operator: vnmr1

Relax. delay 1.000 sec  
Acq. time 0.150 sec  
Width 6410.3 Hz  
2D Width 24140.0 Hz  
16 repetitions  
2 x 512 increments  
OBSERVE H1, 400.0405310 MHz  
DATA PROCESSING  
Sq. sine bell 0.075 sec  
F1 DATA PROCESSING  
Gauss apodization 0.020 sec  
FT size 2048 x 4096  
Total time 5 hr, 39 min

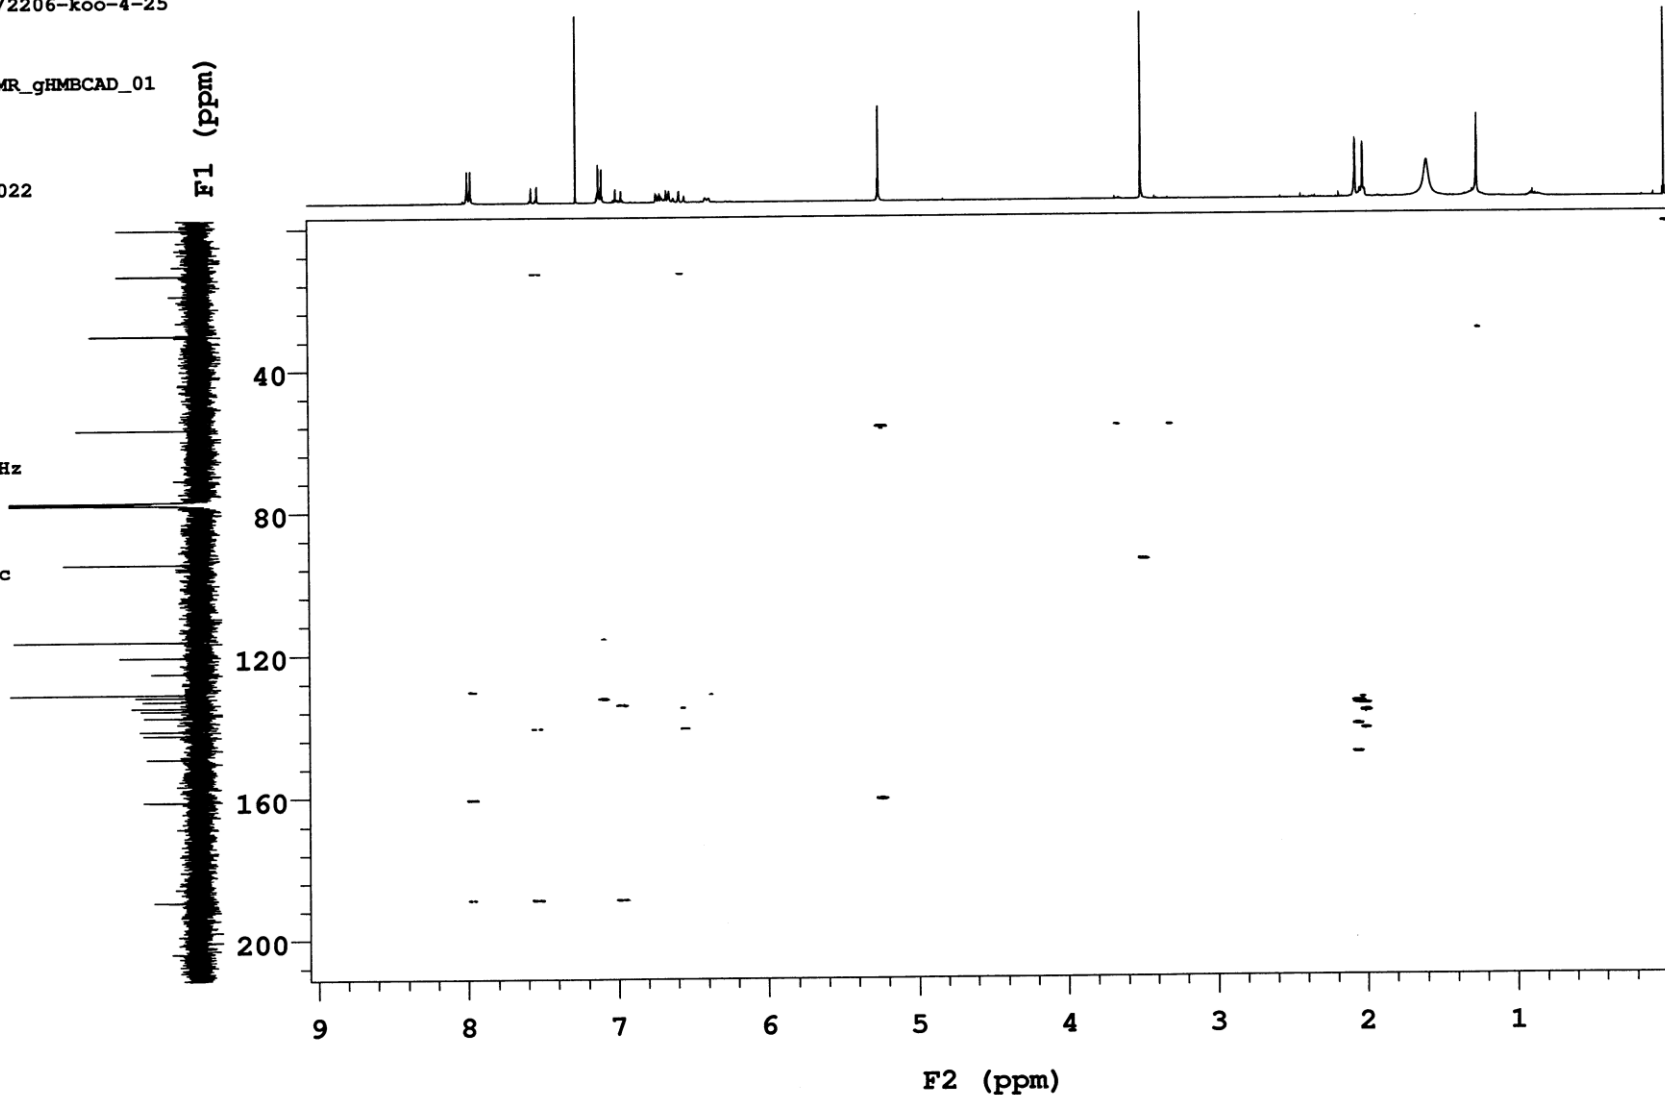

# HMBC for **2b**

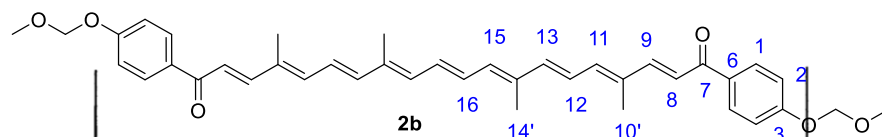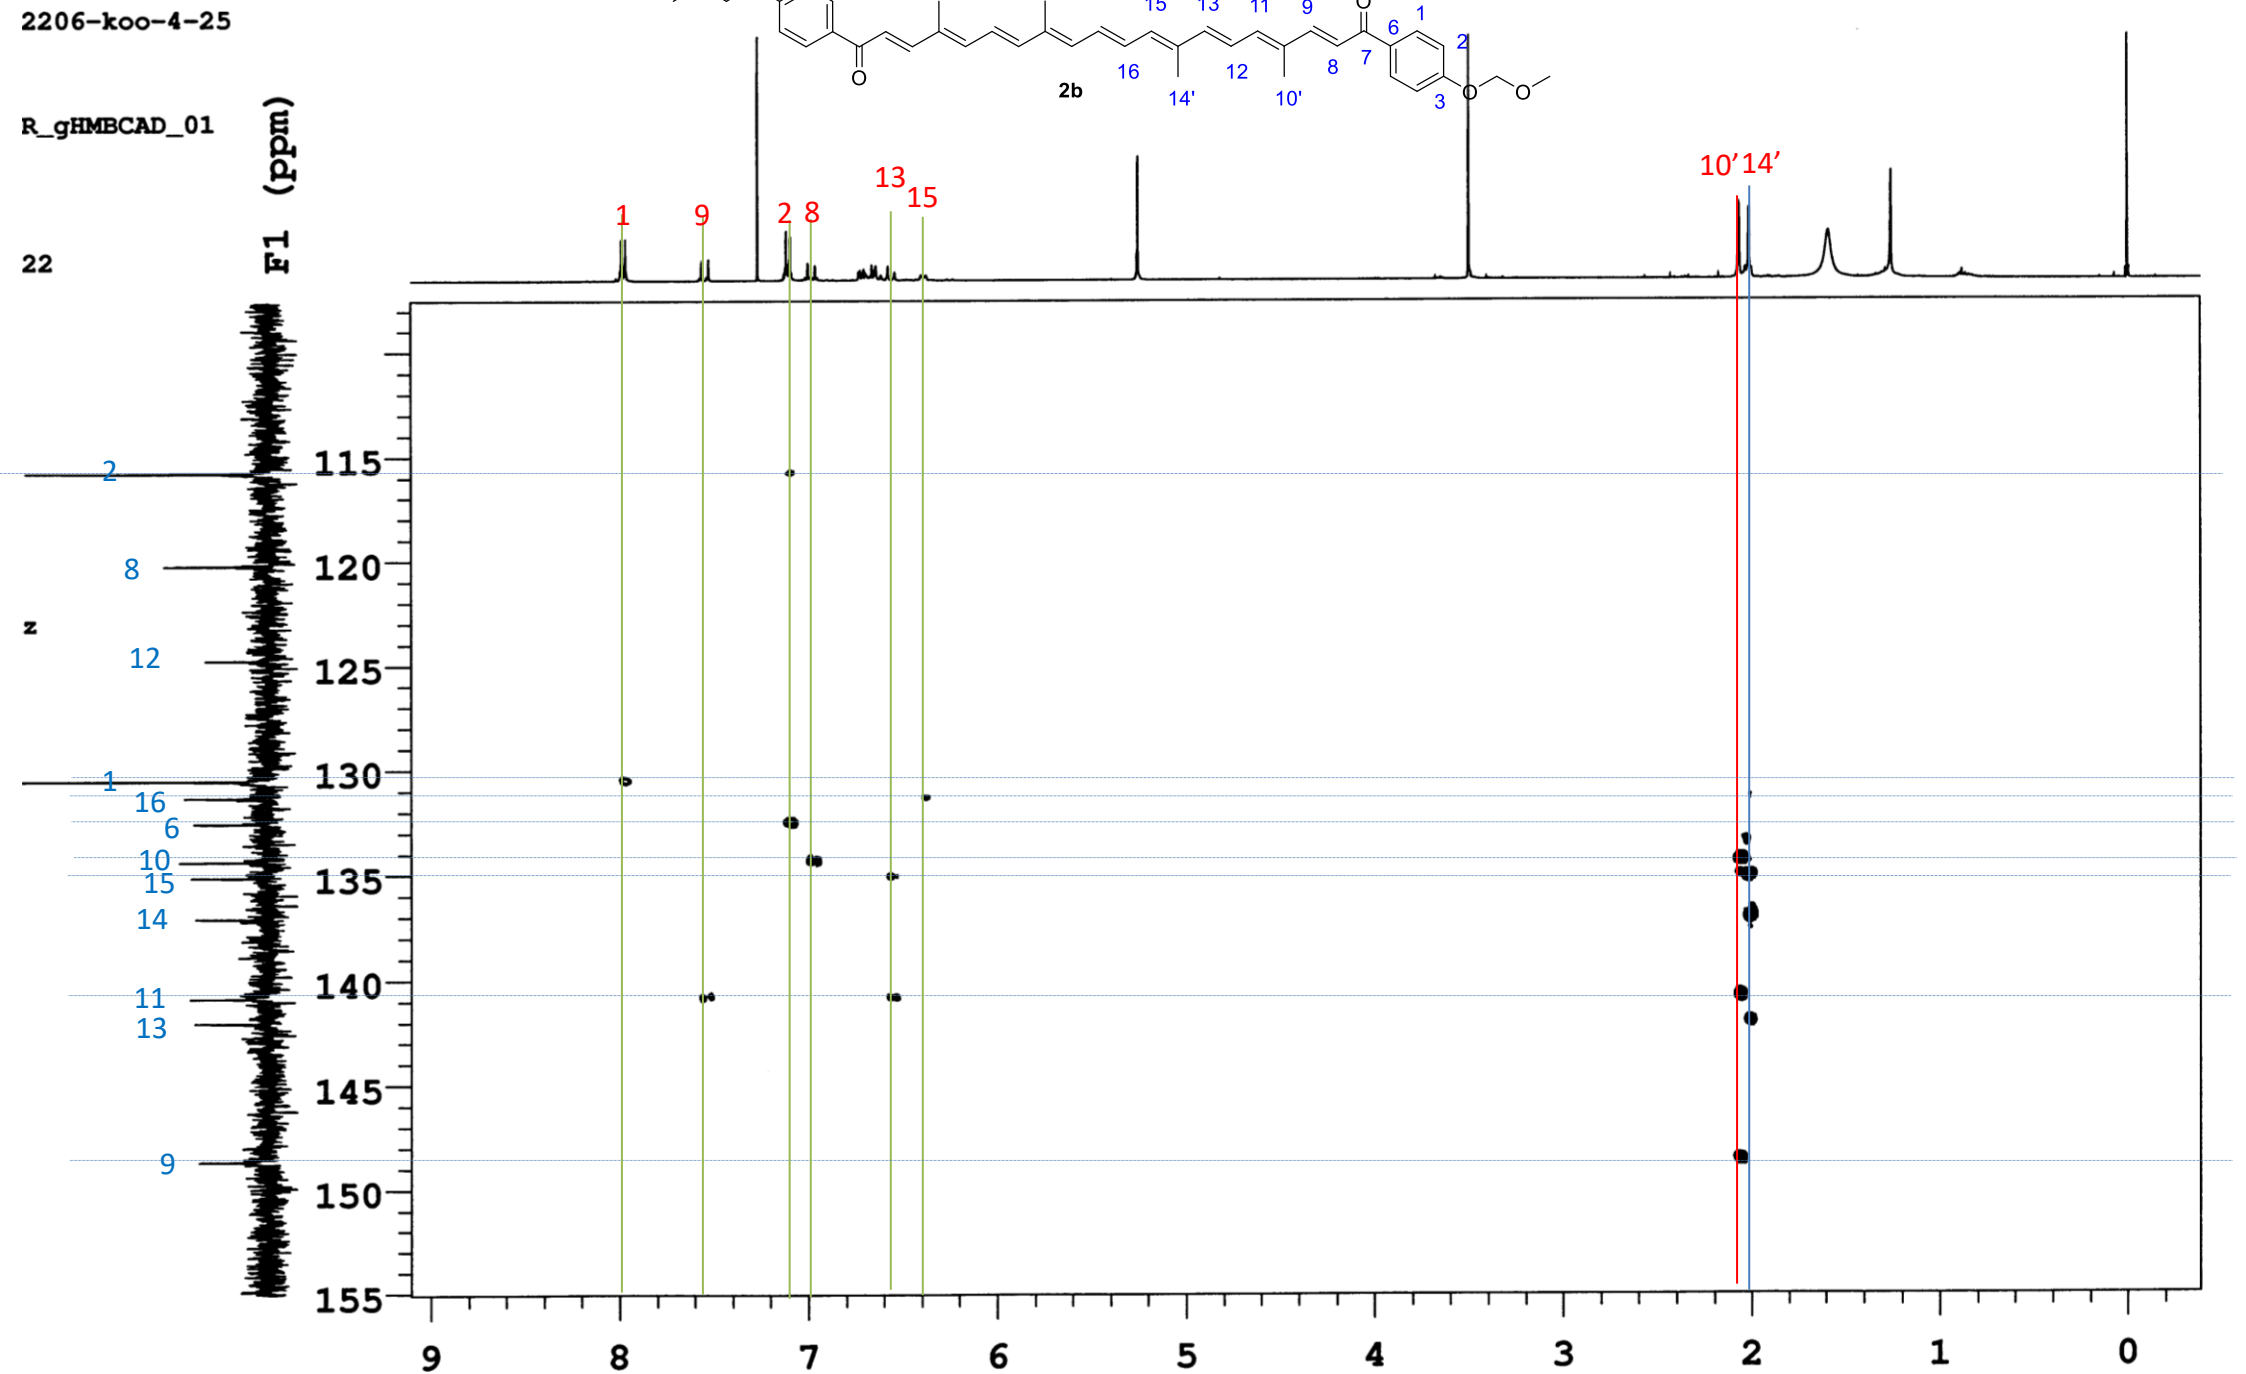

HMBC for **2b**

\_gHMBCAD\_01

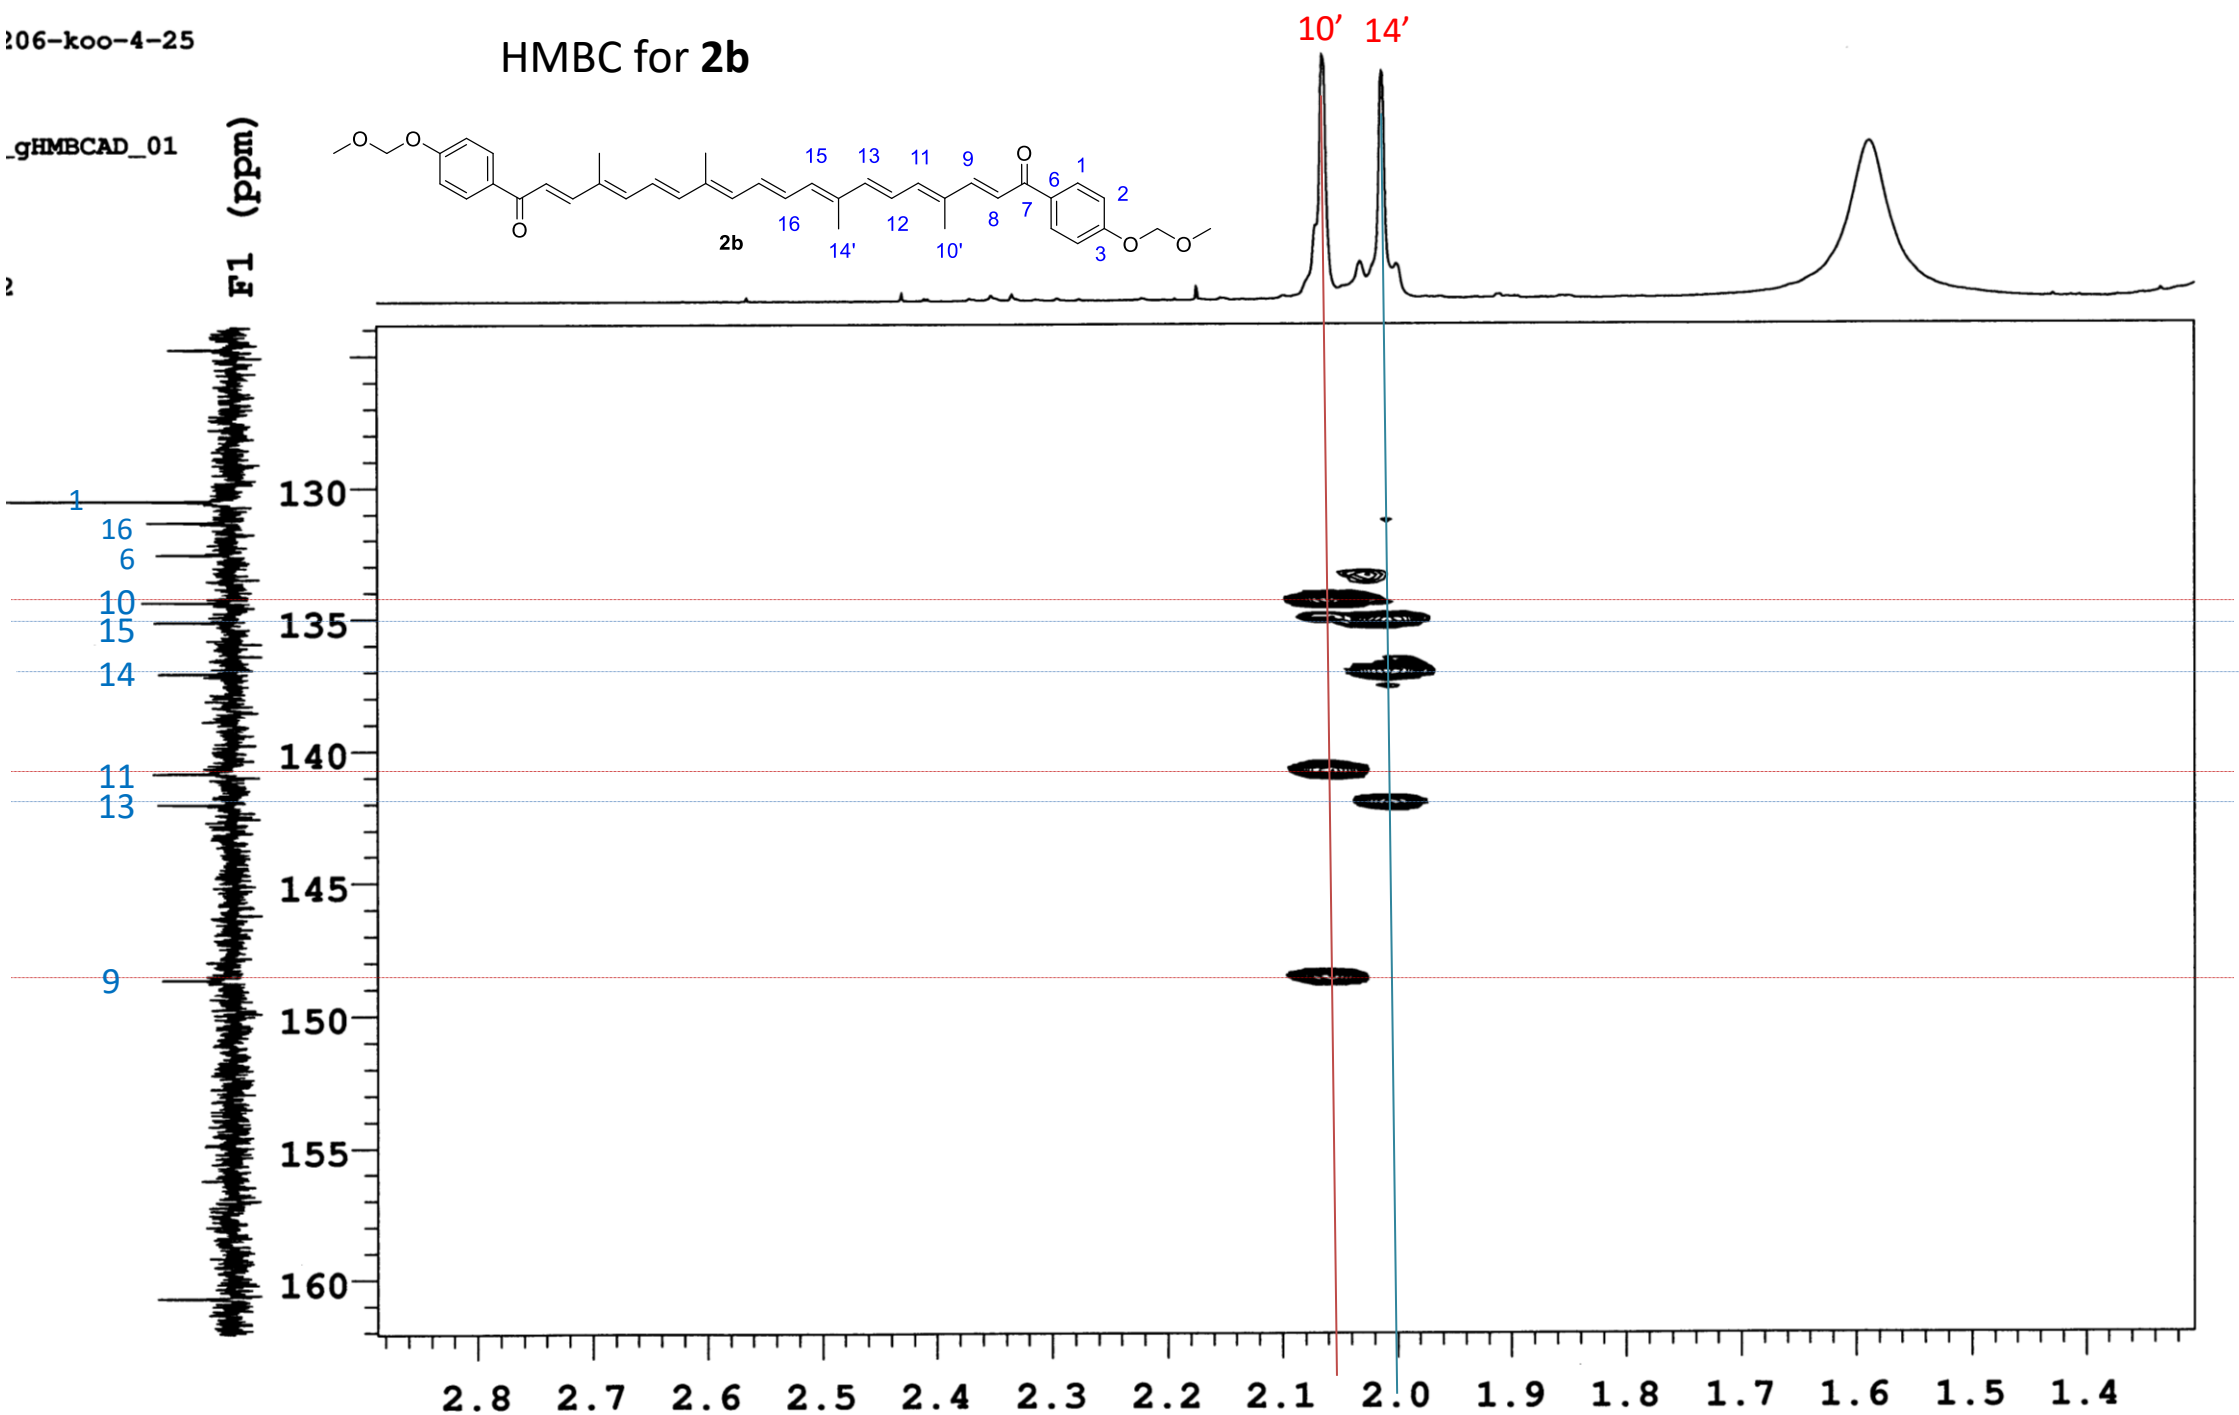

# HMBC for **2b**

'2206-koo-4-25

IR\_gHMBCAD\_01

122

F1 (ppm)

1z

:

132

136

140

144

148

6.8

6.7

6.6

6.5

6.4

6.3

6.2

F2 (ppm)

H<sub>16</sub>

H<sub>12</sub>

H<sub>11</sub>

H<sub>13</sub>

H<sub>15</sub>

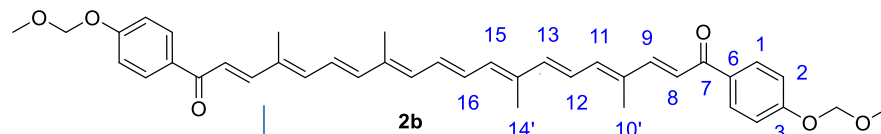

**2b**

HMBC for **2b**

IMR\_gHMBCAD\_01

2022

meta

ortho

4Hz

13C

F1 (ppm)

120  
130  
140  
150  
160  
170  
180  
190

8.4 8.2 8.0 7.8 7.6 7.4 7.2 7.0 6.8 6.6 6.4 6.2 6.0

F2 (ppm)

Ortho

Meta

1

2

H<sub>9</sub>

H<sub>8</sub>

H<sub>16</sub>  
H<sub>12</sub>

H<sub>11</sub>

H<sub>13</sub>

H<sub>15</sub>

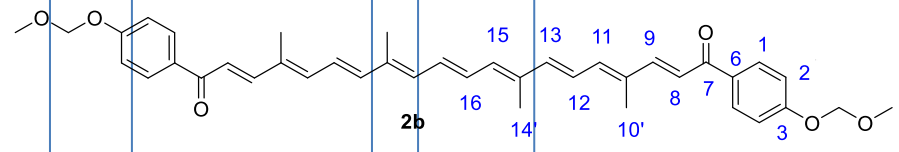

# <sup>13</sup>C-NMR for **2b**

SGS-1557-3re-13C

Sample Name **SGS-1557-3re-13C**  
Date collected **2021-09-09**

Pulse sequence **CARBON**  
Solvent **cdcl3**

Temperature **25**  
Spectrometer **Agilent-NMR.chem.com-vnmr400**  
Study owner **vnmr1**  
Operator **vnmr1**

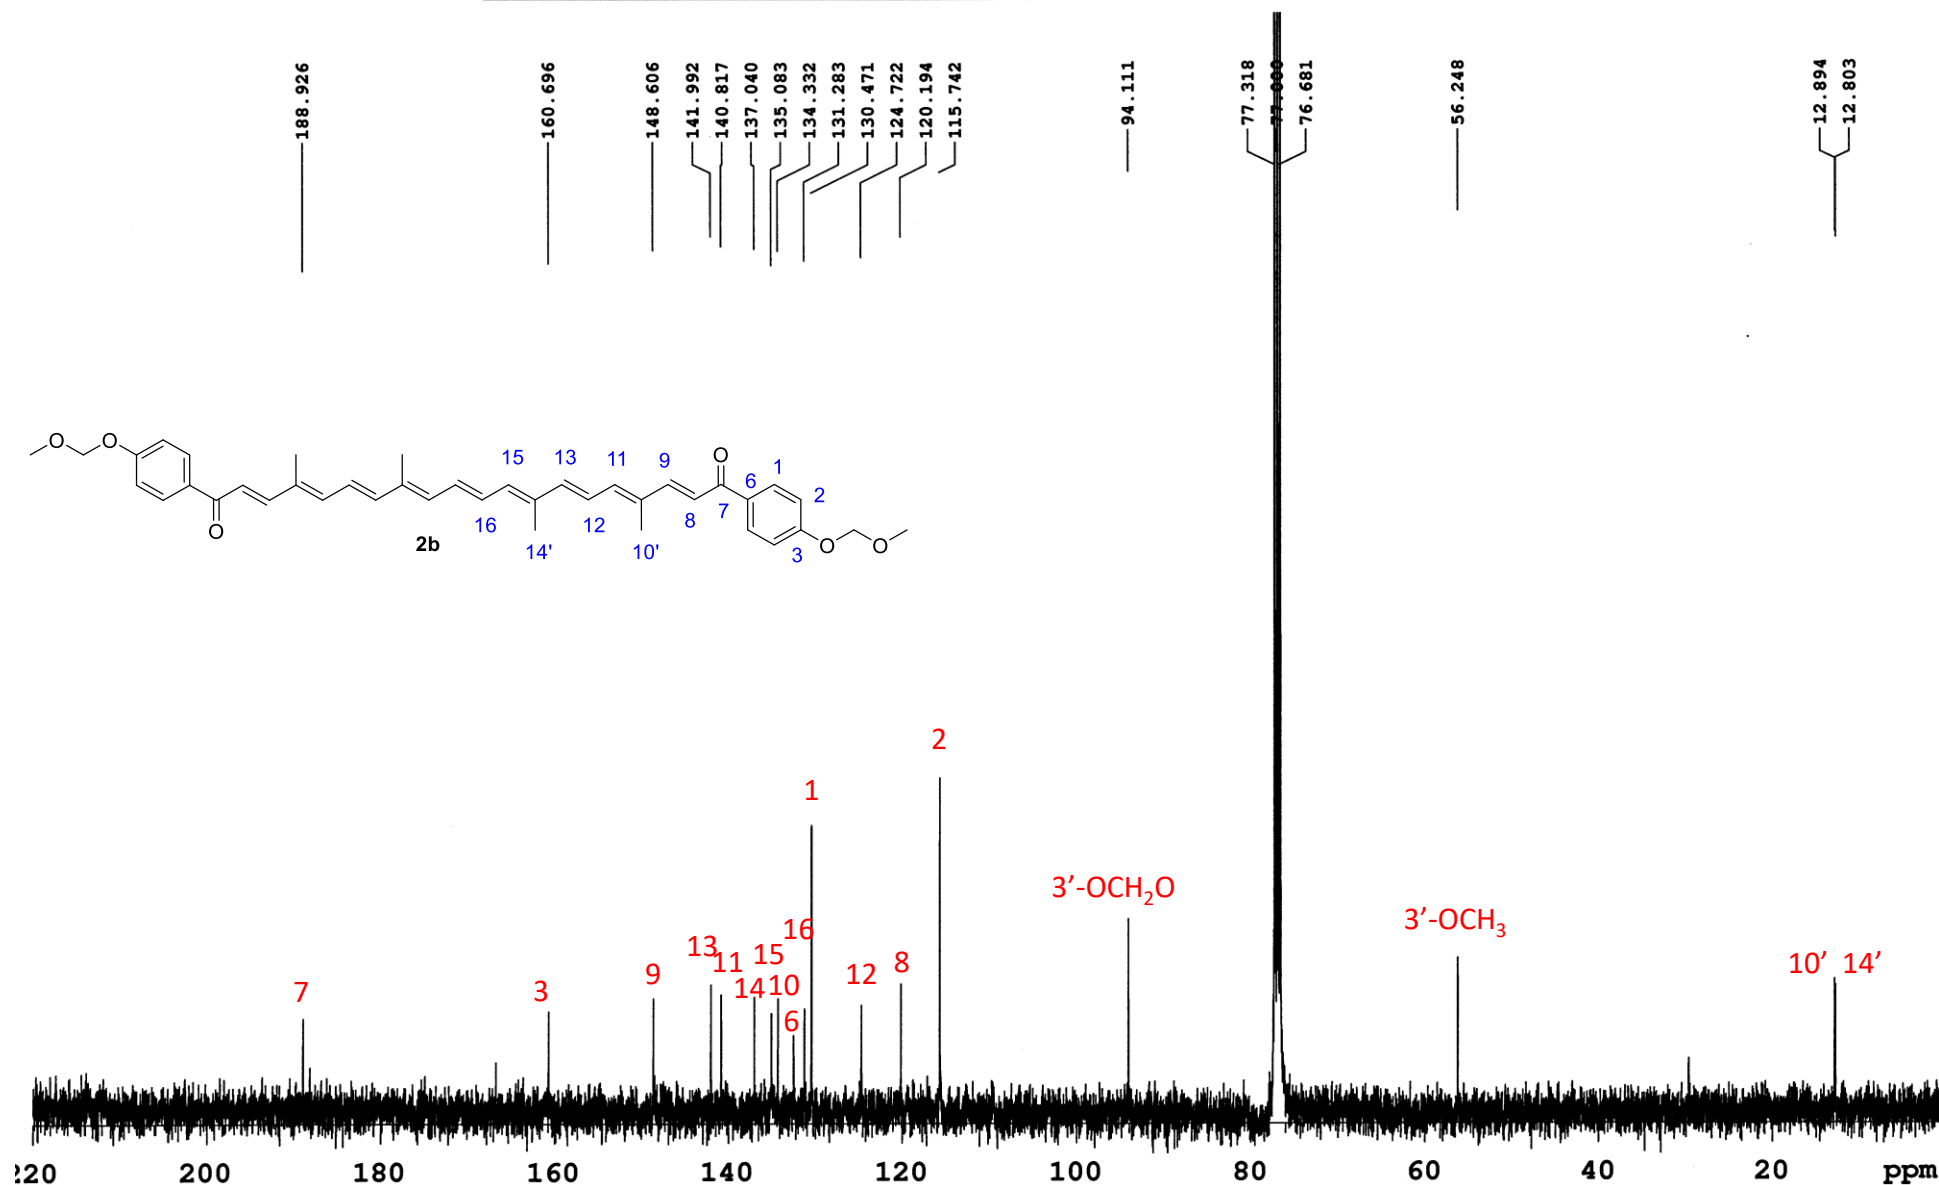

# DEPT for 2b

SGS-1586-3re-DEPT

Sample Name **SGS-1586-3re-DEPT**  
Date collected **2022-06-30**

Pulse sequence **DEPT**  
Solvent **cdcl3**

Temperature **20**  
Spectrometer **Agilent-NMR.chem.com-vnmr400**  
Study owner **vnmr1**  
Operator **vnmr1**

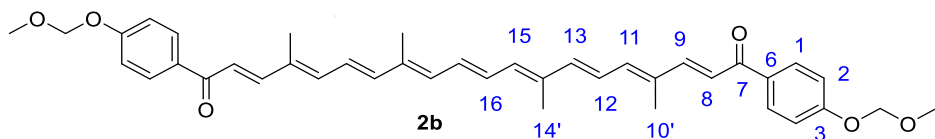

CH3 carbons

3'-OCH<sub>3</sub>

10' 14'

CH2 carbons

3'-OCH<sub>2</sub>O

CH carbons

quaternary carbons

200 180 160 140 120 100 80 60 40 20 ppm



# DEPT for 2b

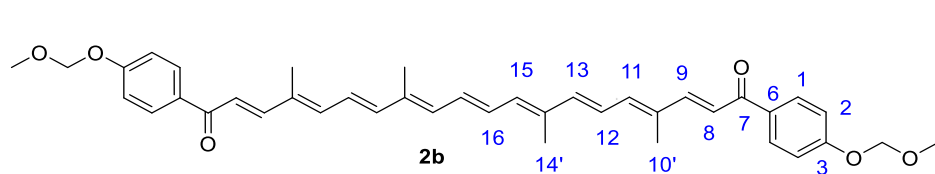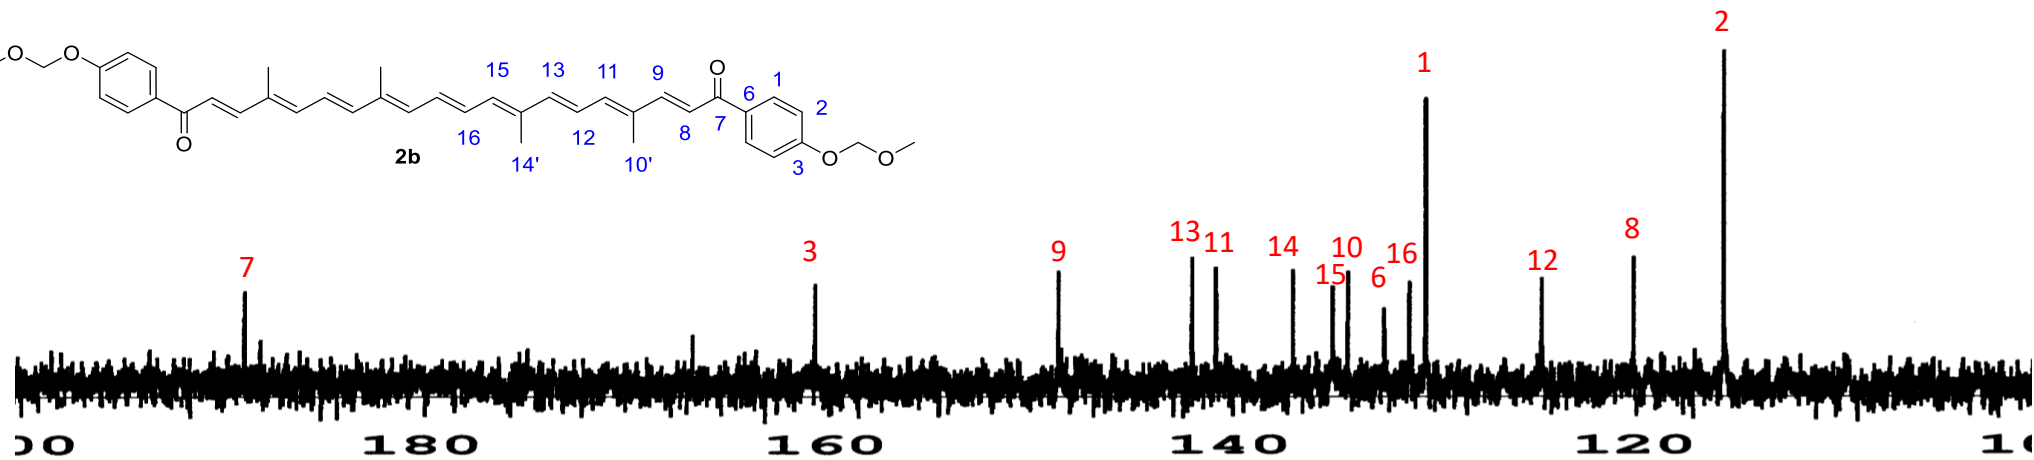

CH<sub>2</sub> carbons

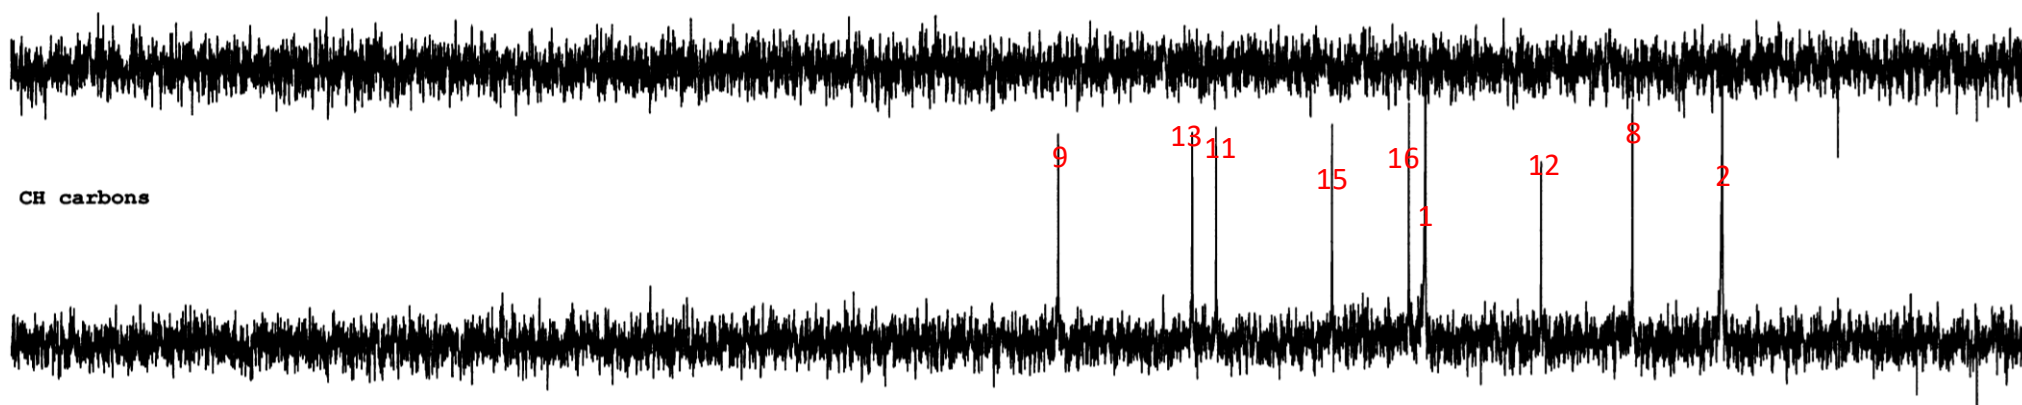

CH carbons

quaternary carbons

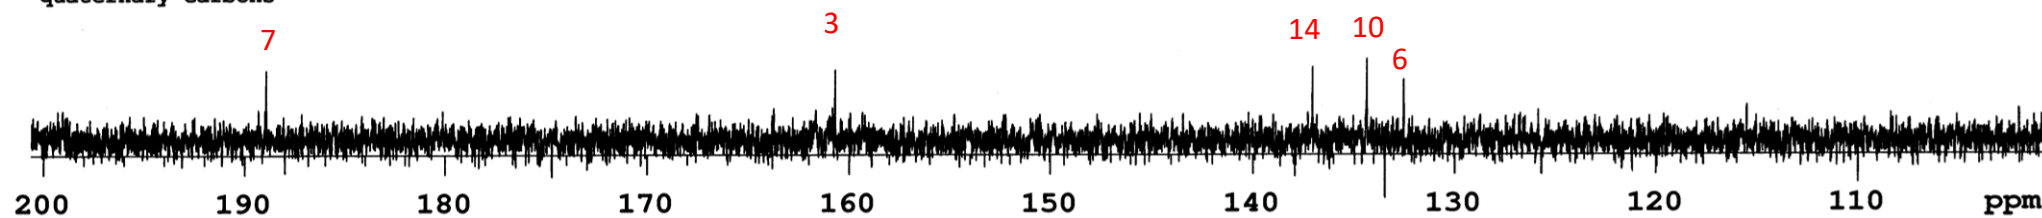

Supplement: s1 [file s1]
