# Supplementary material for: Oxo-Carotenoids as Efficient Superoxide Radical Scavengers
Source: MDPI journal article supplement (doi:10.3390/antiox11081525), 2022-08-05
Supplement: s1 [file s1]

Supplementary Materials-1 for

# Oxo-carotenoids as Efficient Superoxide Radical Scavengers

Gaosheng Shi,<sup>a</sup> Hyein Kim<sup>b</sup> and Sangho Koo<sup>a,b\*</sup>

<sup>a</sup> Department of Energy Science and Technology, <sup>b</sup> Department of Chemistry, Myongji University, Myongji-Ro 116, Yongin, 17058, Gyeonggi-Do, Korea

## Table of Contents

|                                                                                           |       |      |
|-------------------------------------------------------------------------------------------|-------|------|
| 1. Experimental Procedure for <b>2b–2j</b> and <b>3b</b>                                  | ----- | S-2  |
| 2. Cartesian coordinates for the optimized geometry by DFT calculation                    | ----- | S-9  |
| 3. LUMO coefficient of <b>2b</b>                                                          | ----- | S-35 |
| 4. Table S1: Antioxidant activity by DPPH, ABTS, and superoxide radical scavenging assays | ----- | S-36 |

## 1. Experimental Procedure for 2b-2j and 3b.

All-(*E*)-1,20-bis(4-(methoxymethoxy)phenyl)-4,8,13,17-tetramethylicos-

2,4,6,8,10,12,14,16,18-nonaene-1,20-dione (**2b**).

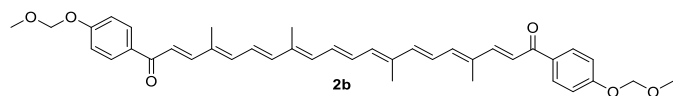

To a stirred solution of C<sub>20</sub> dial **2** (0.30 g,  
1.01 mmol) and 4'-

methoxymethylacetophenone (0.54 g, 3.03 mmol) in MeOH (30 mL) was added NaOH (0.90 g, 20.2 mmol). The mixture was heated at 70 °C for 12 h and cooled to room temperature. The mixture was quenched with 1 M HCl solution, extracted with EtOAc, dried over anhydrous Na<sub>2</sub>SO<sub>4</sub>, filtered, and concentrated under reduced pressure. The crude product was recrystallized from MeOH to give **2b** (0.28 g, 0.45 mmol) in 44% yield as red solid. Data for **2b**: R<sub>f</sub> = 0.28 (3:1 hexane/acetone); <sup>1</sup>H NMR (CDCl<sub>3</sub>) δ = 2.01 (s, 6H), 2.06 (s, 6H), 3.50 (s, 6H), 5.25 (s, 4H), 6.33–6.43 (m, 2H), 6.55 (d, *J* = 14.4 Hz, 2H), 6.62 (d, *J* = 11.2 Hz, 2H), 6.69 (dd, *J* = 14.4, 11.2 Hz, 2H), 6.66–6.76 (m, 2H), 6.97 (d, *J* = 15.2 Hz, 2H), 7.10 (d, *J* = 8.8 Hz, 4H), 7.54 (d, *J* = 15.2 Hz, 2H), 7.97 (d, *J* = 8.8 Hz, 4H) ppm; <sup>13</sup>C NMR (CDCl<sub>3</sub>) δ = 12.8, 12.9, 56.2, 94.1, 115.7, 120.2, 124.7, 130.5, 131.3, 132.5, 134.3, 135.1, 137.0, 140.8, 142.0, 148.6, 160.7, 188.9 ppm; UV (2:1 DMSO/CH<sub>2</sub>Cl<sub>2</sub>, c = 0.26 mmol/L): λ (ε) = 520 nm (385,000); IR (KBr) ν = 2924, 2851, 1734, 1672, 1644, 1600, 1546, 1508, 1441, 1418, 1358, 1302, 1261, 1242, 1218, 1200, 1170, 1153, 1081, 986, 922, 828, 749, 656 cm<sup>-1</sup>; HRMS (EI) calcd for C<sub>40</sub>H<sub>44</sub>O<sub>6</sub> 620.3138, found 620.3135.

All-(*E*)-1,20-bis(2-hydroxyphenyl)-4,8,13,17-tetramethylicos-2,4,6,8,10,12,14,16,18-nonaene-1,20-dione (**2c**).

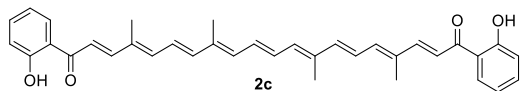

Following the general procedure for **2b**, the reaction of  
C<sub>20</sub> dial **2** (0.10 g, 0.34 mmol) and 2'-

hydroxyacetophenone (0.14 g, 1.03 mmol) with NaOH (0.27 g, 6.74 mmol) in MeOH (10 mL) at 70 °C for 12 h provided **2c** (83 mg, 0.16 mmol) in 46% yield as red solid. The all-(*E*) product was obtained by recrystallization from Et<sub>2</sub>O and MeOH. Data for **2c**: R<sub>f</sub> = 0.42 (3:1 hexane/acetone); <sup>1</sup>H NMR δ = 2.02 (s, 6H), 2.08 (s, 6H), 6.35–6.48 (m, 2H), 6.59 (d, *J* = 14.4 Hz, 2H), 6.68 (d, *J* = 11.6 Hz, 2H), 6.68–6.80 (m, 4H), 6.91 (dd, *J* = 8.4, 8.0 Hz, 2H), 7.00 (d, *J* = 8.4 Hz, 2H), 7.09 (d, *J* = 15.2 Hz, 2H), 7.46 (dd, *J* = 8.4, 8.0 Hz, 2H), 7.66 (d, *J* = 15.2 Hz, 2H), 7.86 (d, *J* = 8.4 Hz, 2H), 13.01 (s, 2H) ppm; <sup>13</sup>C NMR δ = ppm; UV (2:1 DMSO/CH<sub>2</sub>Cl<sub>2</sub>, c = 0.26 mmol/L): λ<sub>max</sub> (ε) = 549 nm (432,692); IR (KBr) ν = 3387, 2923, 1713, 1629, 1578, 1538, 1486, 1440, 1362, 1340, 1304, 1275, 1256, 1199, 1157, 1026, 966. 751, 688 cm<sup>-1</sup>; HRMS (ESI) calcd for C<sub>36</sub>H<sub>36</sub>O<sub>4</sub>+Na 555.2506, found 555.2507.

All-(*E*)-1,20-bis(3-hydroxyphenyl)-4,8,13,17-tetramethylicos-2,4,6,8,10,12,14,16,18-nonaene-1,20-dione (**2d**).

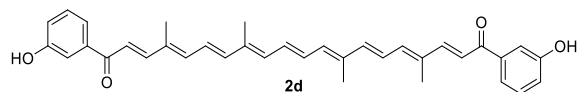

Following the general procedure for **2b**, the reaction of C<sub>20</sub> dial **2** (0.10 g, 0.34 mmol) and 3'-

hydroxyacetophenone (0.23 g, 1.69 mmol) with NaOH (0.13 g, 15 mmol) in MeOH (10 mL) at 70 °C for 12 h produced **2d** (0.157 g, 0.295 mmol) in 87% yield as red solid, which was all-(*E*) product. Data for **2d**: R<sub>f</sub> = 0.23 (1:1 hexane/acetone); <sup>1</sup>H NMR (DMSO-d<sub>6</sub>) δ = 1.98 (s, 6H), 2.05 (s, 6H), 6.43–6.54 (m, 2H), 6.65 (d, *J* = 14.8 Hz, 2H), 6.72–6.81 (m, 4H), 6.79–6.88 (m, 2H), 7.01 (ddd, *J* = 8.0, 2.4, 1.2 Hz, 2H), 7.08 (d, *J* = 15.2 Hz, 2H), 7.32 (t, *J* = 8.0 Hz, 2H), 7.35 (dd, *J* = 2.4, 1.2 Hz, 2H), 7.42 (d, *J* = 15.2 Hz, 2H), 7.48 (dt, *J<sub>d</sub>* = 8.0, *J<sub>t</sub>* = 1.2 Hz, 2H), 9.77 (s, 2H) ppm; <sup>13</sup>C NMR (DMSO-d<sub>6</sub>) δ = 13.0, 13.1, 114.8, 119.6, 120.3, 120.9, 125.7, 130.2, 132.2, 135.0, 135.7, 137.6, 139.9, 141.6, 142.6, 148.7, 158.1, 189.2 ppm; UV (2:1 DMSO/CH<sub>2</sub>Cl<sub>2</sub>, c = 0.26 mmol/L):

$\lambda_{\max} (\epsilon) = 518 \text{ nm (253,076)}$ ; IR (KBr)  $\nu = 3378, 3235, 1639, 1579, 1537, 1449, 1288, 1217, 1181, 998, 968, 879, 831, 784, 760, 671, 651 \text{ cm}^{-1}$ ; HRMS (ESI) calcd for  $\text{C}_{36}\text{H}_{36}\text{O}_4 + \text{Na}$  555.2506, found 555.2513.

All-(*E*)-1,20-bis(4-hydroxyphenyl)-4,8,13,17-tetramethylicos-2,4,6,8,10,12,14,16,18-nonaene-1,20-dione (**2e**).

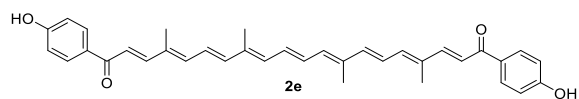

To a stirred solution of  $\text{C}_{20}$  dial **2** (0.10 g, 0.34 mmol) and 4'-hydroxyacetophenone (0.23 g, 1.69 mmol) in *t*-BuOH/toluene (5 mL/15 mL) was added *t*-BuOK (0.38 g, 3.40 mmol). The mixture was heated at 110 °C for 12 h and cooled to room temperature. The mixture was quenched with 1 M HCl solution, extracted with EtOAc (20 mL). The organic layer was placed in a -5 °C refrigerator overnight to give a precipitate, which was filtered to give **2e** (15 mg, 0.03 mmol) in 9% yield as red solid. Data for **2e**:  $R_f = 0.15$  (3:1 hexane/acetone);  $^1\text{H NMR } \delta = 1.98 \text{ (s, 6H)}, 2.05 \text{ (s, 6H)}, 6.41\text{--}6.54 \text{ (m, 2H)}, 6.63 \text{ (d, } J = 14.4 \text{ Hz, 2H)}, 6.72\text{--}6.86 \text{ (m, 6H)}, 6.85 \text{ (d, } J = 8.4 \text{ Hz, 4H)}, 7.16 \text{ (d, } J = 14.8 \text{ Hz, 2H)}, 7.39 \text{ (d, } J = 14.8 \text{ Hz, 2H)}, 7.95 \text{ (d, } J = 8.4 \text{ Hz, 4H)}, 10.37 \text{ (br s, 2H)}$  ppm; UV (2:1 DMSO/ $\text{CH}_2\text{Cl}_2$ ,  $c = 0.26 \text{ mmol/L}$ ):  $\lambda_{\max} (\epsilon) = 516 \text{ nm (317,692)}$ ; IR (KBr)  $\nu = 2923, 2854, 1713, 1668, 1653, 1603, 1552, 1506, 1464, 1362, 1221, 1154, 990, 634 \text{ cm}^{-1}$ ; HRMS (ESI) calcd for  $\text{C}_{36}\text{H}_{36}\text{O}_4 + \text{Na}$  555.2506, found 555.2509.

All-(*E*)-1,20-bis(2-methoxyphenyl)-4,8,13,17-tetramethylicos-2,4,6,8,10,12,14,16,18-nonaene-1,20-dione (**2f**).

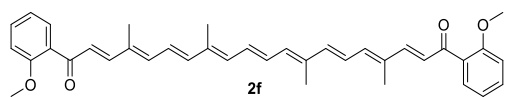

Following the general procedure for **2b**, the reaction of  $\text{C}_{20}$  dial **2** (0.10 g, 0.34 mmol) and 2'-methoxyacetophenone (0.15 g, 1.01 mmol) with NaOH (0.13 g, 3.25 mmol) in MeOH (10 mL) at

70 °C for 12 h gave all-(*E*)-**2f** (0.168 g, 0.30 mmol) in 89% yield as red solid. Data for **2f**:  $R_f$  = 0.37 (3:1 hexane/acetone);  $^1\text{H}$  NMR ( $\text{CDCl}_3$ )  $\delta$  = 1.99 (s, 6H), 2.01 (s, 6H), 3.88 (s, 6H), 6.30–6.41 (m, 2H), 6.51 (d,  $J$  = 14.4 Hz, 2H), 6.55 (d,  $J$  = 11.6 Hz, 2H), 6.64–6.75 (m, 2H), 6.60 (dd,  $J$  = 14.4, 11.6 Hz, 2H), 6.80 (d,  $J$  = 15.2 Hz, 2H), 6.98 (dd,  $J$  = 8.4, 0.8 Hz, 2H), 7.02 (dt,  $J_d$  = 0.8,  $J_t$  = 7.6 Hz, 2H), 7.32 (d,  $J$  = 15.2 Hz, 2H), 7.44 (dt,  $J_d$  = 2.0,  $J_t$  = 8.4 Hz, 2H), 7.55 (dd,  $J$  = 7.6, 2.0 Hz, 2H) ppm;  $^{13}\text{C}$  NMR ( $\text{CDCl}_3$ )  $\delta$  = 12.8, 12.8, 55.7, 111.6, 120.6, 124.8, 125.8, 129.8, 130.1, 131.2, 132.3, 134.5, 135.0, 137.0, 140.5, 141.8, 148.1, 157.8, 193.2 ppm; UV (2:1 DMSO/ $\text{CH}_2\text{Cl}_2$ ,  $c$  = 0.26 mmol/L):  $\lambda_{\text{max}}$  ( $\epsilon$ ) = 516 nm (368,846); IR (KBr)  $\nu$  = 1642, 1597, 1583, 1541, 1484, 1326, 1312, 1287, 1242, 1215, 1194, 1059, 1020, 978, 775, 760, 649  $\text{cm}^{-1}$ ; HRMS (ESI) calcd for  $\text{C}_{38}\text{H}_{40}\text{O}_4 + \text{Na}$  583.2819, found 583.2821.

All-(*E*)-1,20-bis(3-methoxyphenyl)-4,8,13,17-tetramethylicos-2,4,6,8,10,12,14,16,18-nonaene-1,20-dione (**2g**).

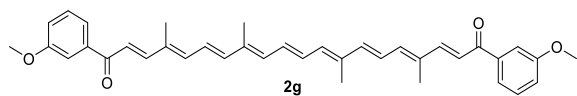

Following the general procedure for **2b**, the reaction of  $\text{C}_{20}$  dial **2** (0.10 g, 0.34 mmol) and 3'-

methoxyacetophenone (0.152 g, 1.01 mmol) with NaOH (0.135 g, 3.4 mmol) in MeOH (10 mL) at 70 °C for 12 h provided all-(*E*)-**2g** (0.113 g, 0.201 mmol) in 59% yield as red solid. Data for **2g**:  $R_f$  = 0.35 (3:1 hexane/acetone);  $^1\text{H}$  NMR ( $\text{CDCl}_3$ )  $\delta$  = 2.01 (s, 6H), 2.06 (s, 6H), 3.88 (s, 6H), 6.33–6.43 (m, 2H), 6.56 (d,  $J$  = 14.0 Hz, 2H), 6.63 (d,  $J$  = 11.2 Hz, 2H), 6.69 (dd,  $J$  = 14.0, 11.2 Hz, 2H), 6.67–6.77 (m, 2H), 6.95 (d,  $J$  = 15.2 Hz, 2H), 7.10 (ddd,  $J$  = 8.0, 2.8, 0.8 Hz, 2H), 7.38 (dd,  $J$  = 8.0, 7.6 Hz, 2H), 7.50 (dd,  $J$  = 4.0, 2.4 Hz, 2H), 7.55 (d,  $J$  = 15.2 Hz, 2H), 7.55 (ddd,  $J$  = 8.0, 1.8, 0.8 Hz, 2H) ppm;  $^{13}\text{C}$  NMR ( $\text{CDCl}_3$ )  $\delta$  = 12.8, 12.9, 55.5, 112.8, 118.8, 120.4, 120.9, 124.7, 129.4, 131.0, 134.3, 135.2, 137.1, 140.1, 141.2, 142.2, 149.3, 159.8, 190.2 ppm; UV (2:1 DMSO/ $\text{CH}_2\text{Cl}_2$ ,  $c$  = 0.26 mmol/L):  $\lambda_{\text{max}}$  ( $\epsilon$ ) = 510 nm (230,000); IR (KBr)  $\nu$  = 2938, 2835, 1676,

1595, 1581, 1542, 1486, 1463, 1429, 1261, 1195, 1171, 1034, 971, 874, 756, 683  $\text{cm}^{-1}$ ; HRMS (ESI) calcd for  $\text{C}_{38}\text{H}_{40}\text{O}_4+\text{Na}$  583.2819, found 583.2824.

All-(*E*)-1,20-bis(4-methoxyphenyl)-4,8,13,17-tetramethylicos-2,4,6,8,10,12,14,16,18-nonaene-1,20-dione (**2h**).

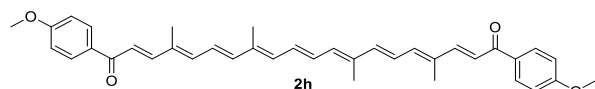

Following the general procedure for **2a**, the reaction of  $\text{C}_{20}$  dial **2** (0.10 g, 0.34 mmol) and 4'-methoxyacetophenone (0.28 g, 1.69 mmol) with 40% methanol solution of triton B (1.60 g, 2.36 mmol) in THF (10 mL) at 25 °C for 12 h produced **2h** (0.13 g, 0.23 mmol) in 69% yield as red solid. Data for **2h**:  $R_f$  = 0.27 (3:1 hexane/acetone);  $^1\text{H}$  NMR ( $\text{CDCl}_3$ )  $\delta$  = 2.01 (s, 6H), 2.06 (s, 6H), 3.88 (s, 6H), 6.33–6.43 (m, 2H), 6.55 (d,  $J$  = 14.4 Hz, 2H), 6.62 (d,  $J$  = 11.2 Hz, 2H), 6.64–6.75 (m, 4H), 6.96 (d,  $J$  = 8.8 Hz, 4H), 6.99 (d,  $J$  = 15.2 Hz, 2H), 7.54 (d,  $J$  = 15.2 Hz, 2H), 7.99 (d,  $J$  = 8.8 Hz, 4H) ppm; UV (2:1 DMSO/ $\text{CH}_2\text{Cl}_2$ ,  $c$  = 0.26 mmol/L):  $\lambda$  ( $\epsilon$ ) = 515 nm (75,384); IR (KBr)  $\nu$  = 2924, 2852, 1735, 1641, 1601, 1546, 1510, 1457, 1418, 1397, 1332, 1304, 1256, 1219, 1177, 1119, 1020, 978, 958, 817  $\text{cm}^{-1}$ ; HRMS (ESI) calcd for  $\text{C}_{38}\text{H}_{40}\text{O}_4+\text{Na}$  583.2819, found 583.2823.

All-(*E*)-4,8,13,17-tetramethyl-1,20-bis(2,4,6-trimethoxyphenyl)icosa-2,4,6,8,10,12,14,16,18-nonaene-1,20-dione (**2i**).

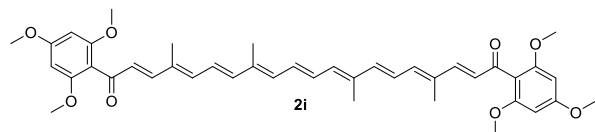

Following the general procedure for **2a**, the reaction of  $\text{C}_{20}$  dial **2** (0.10 g, 0.34 mmol) and 2',4',6'-trimethoxyacetophenone (0.21 g, 1.01 mmol) with 40% methanol solution of triton B (0.71 g, 1.69 mmol) in THF (10 mL) at 25 °C for 12 h gave **2i** (0.083 g, 0.16 mmol) in 39% yield as red solid. The all-(*E*) product was obtained by recrystallization from  $\text{Et}_2\text{O}$  and MeOH. Data for **2i**:  $R_f$  = 0.26 (2:1 hexane/acetone);  $^1\text{H}$  NMR

(CDCl<sub>3</sub>)  $\delta$  = 1.97 (s, 12H), 3.76 (s, 12H), 3.85 (s, 6H), 6.15 (s, 4H), 6.26–6.36 (m, 2H), 6.43 (d,  $J$  = 15.6 Hz, 2H), 6.44 (d,  $J$  = 11.6 Hz, 2H), 6.47 (d,  $J$  = 14.4 Hz, 2H), 6.63 (dd,  $J$  = 14.4, 11.6 Hz, 2H), 6.64–6.74 (m, 2H), 7.05 (d,  $J$  = 15.6 Hz, 2H) ppm; <sup>13</sup>C NMR (CDCl<sub>3</sub>)  $\delta$  = 12.8, 12.8, 55.4, 55.9, 90.7, 112.1, 124.7, 127.8, 131.1, 134.6, 134.8, 137.0, 139.9, 141.6, 149.0, 158.6, 162.1, 194.5 ppm; UV (2:1 DMSO/CH<sub>2</sub>Cl<sub>2</sub>, c = 0.26 mmol/L):  $\lambda$  ( $\epsilon$ ) = 497 nm (183,846); IR (KBr)  $\nu$  = 3003, 2937, 2840, 1643, 1602, 1587, 1549, 1494, 1455, 1437, 1412, 1368, 1337, 1261, 1225, 1204, 1155, 1126, 1085, 1022, 973, 921, 812, 753, 666, 645 cm<sup>-1</sup>; HRMS (FAB) calcd for C<sub>42</sub>H<sub>49</sub>O<sub>8</sub> 681.3427, found 681.3431.

All-(*E*)-1,20-bis(4-chlorophenyl)-4,8,13,17-tetramethylicos-2,4,6,8,10,12,14,16,18-nonaene-1,20-dione (**2j**).

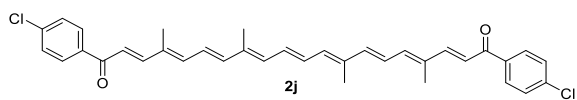

Following the general procedure for **2b**, the reaction of C<sub>20</sub> dial **2** (0.10 g, 0.34 mmol) and 4'-chloroacetophenone (0.16 g, 1.01 mmol) with NaOH (0.27 g, 6.75 mmol) in MeOH (10 mL) at 70 °C for 12 h provided all-(*E*)-**2j** (0.032 g, 0.056 mmol) in 16% yield as red solid after recrystallization from MeOH. Data for **2j**: R<sub>f</sub> = 0.32 (3:1 hexane/acetone); <sup>1</sup>H NMR (CDCl<sub>3</sub>)  $\delta$  = 2.01 (s, 6H), 2.06 (s, 6H), 6.34–6.44 (m, 2H), 6.55 (d,  $J$  = 14.0 Hz, 2H), 6.64 (d,  $J$  = 11.6 Hz, 2H), 6.61–6.76 (m, 4H), 6.92 (d,  $J$  = 15.6 Hz, 2H), 7.45 (d,  $J$  = 8.0 Hz, 4H), 7.55 (d,  $J$  = 15.6 Hz, 2H), 7.91 (d,  $J$  = 8.0 Hz, 4H) ppm; UV (2:1 DMSO/CH<sub>2</sub>Cl<sub>2</sub>, c = 0.26 mmol/L):  $\lambda$  ( $\epsilon$ ) = 518 nm (180,384); IR (KBr)  $\nu$  = 2920, 2853, 1734, 1649, 1590, 1551, 1488, 1463, 1398, 1367, 1332, 1299, 1285, 1261, 1218, 1097, 1033, 1011, 976, 955, 823, 760, 735, 676 cm<sup>-1</sup>; HRMS (EI) calcd for C<sub>36</sub>H<sub>34</sub>Cl<sub>2</sub>O<sub>2</sub> 568.1936, found 568.1835.

All-(*E*)-1,28-bis(4-(methoxymethoxy)phenyl)-4,8,12,17,21,25-hexamethyloctacosa-2,4,6,8,10,12,14,16,18,20,22,24,26-tridecaene-1,28-dione (**3b**).

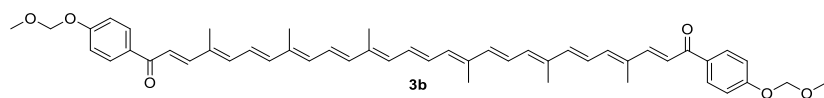

To a stirred solution of C<sub>30</sub> dial **3** (85 mg, 0.198 mmol) and 4'-methoxymethylacetophenone (0.178 g, 0.991 mmol) in toluene (15 mL) was added *t*-BuOK (0.22 g, 0.198 mmol). The mixture was stirred at 110 °C for 12 h and cooled to room temperature. The mixture was diluted with EtOAc, washed with H<sub>2</sub>O, dried over anhydrous Na<sub>2</sub>SO<sub>4</sub>, filtered, and concentrated under reduced pressure. The crude product was recrystallized from methanol to give all-(*E*)-**3b** (0.026 g, 0.035 mmol) in 18% yield as dark red solid. Data for **3b**: R<sub>f</sub> = 0.5 (2:1 hexane/acetone); <sup>1</sup>H NMR (CDCl<sub>3</sub>) δ = 2.01 (s, 6H), 2.06 (s, 6H), 3.49 (s, 6H), 5.25 (s, 4H), 6.30–6.40 (m, 2H), 6.36 (d, *J* = 11.6 Hz, 2H), 6.46 (d, *J* = 14.8 Hz, 2H), 6.57 (dd, *J* = 14.8, 11.6 Hz, 2H), 6.61–6.71 (m, 8H), 6.96 (d, *J* = 15.6 Hz, 2H), 7.10 (d, *J* = 8.8 Hz, 4H), 7.54 (d, *J* = 15.6 Hz, 2H), 7.97 (d, *J* = 8.8 Hz, 4H) ppm; UV (2:1 DMSO/CH<sub>2</sub>Cl<sub>2</sub>, c = 0.521 mmol/L): λ (ε) = 551 nm (137,044); IR (KBr) ν = 2921, 1646, 1604, 1591, 1578, 1527, 1509, 1443, 1407, 1364, 1330, 1306, 1252, 1209, 1171, 1154, 1105, 1079, 1038, 994, 975, 962, 926, 881, 863, 833, 820, 742, 661 cm<sup>-1</sup>; HRMS (FAB) calcd for C<sub>50</sub>H<sub>56</sub>O<sub>6</sub> 752.4077, found 752.4076.



## 2. Cartesian coordinates for the optimized geometry by DFT calculation

{B3LYP/6-311G(d,p) function set}

Compound **1a**

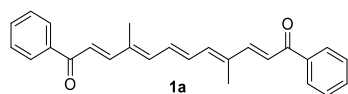

| Symbol | X         | Y         | Z         |
|--------|-----------|-----------|-----------|
| C      | 0.566091  | 0.381132  | 0.044707  |
| C      | -0.566074 | -0.381185 | 0.044766  |
| C      | 1.885656  | -0.175317 | 0.044344  |
| C      | -1.885639 | 0.175265  | 0.044344  |
| H      | -0.453057 | -1.462917 | 0.045110  |
| H      | 0.453074  | 1.462864  | 0.044905  |
| C      | 3.081396  | 0.493411  | 0.044766  |
| H      | 1.934660  | -1.263826 | 0.043779  |
| C      | -3.081379 | -0.493462 | 0.044872  |
| H      | -1.934641 | 1.263773  | 0.043630  |
| C      | 3.203095  | 1.996467  | 0.046715  |
| C      | 4.291015  | -0.301751 | 0.044153  |
| C      | -3.203079 | -1.996518 | 0.047029  |
| C      | -4.290998 | 0.301699  | 0.044164  |
| H      | 3.753804  | 2.338547  | 0.930614  |
| H      | 2.236338  | 2.500064  | 0.042503  |
| H      | 3.762160  | 2.340466  | -0.831176 |
| C      | 5.564152  | 0.159902  | 0.039536  |
| H      | 4.172531  | -1.383994 | 0.048203  |
| H      | -3.762149 | -2.340638 | -0.830811 |
| H      | -2.236323 | -2.500116 | 0.042882  |
| H      | -3.753784 | -2.338474 | 0.930979  |
| C      | -5.564136 | -0.159953 | 0.039617  |
| H      | -4.172515 | 1.383943  | 0.048067  |
| C      | 6.698953  | -0.791172 | 0.056316  |
| H      | 5.766998  | 1.224179  | 0.046321  |
| C      | -6.698932 | 0.791133  | 0.056273  |
| H      | -5.766977 | -1.224228 | 0.046545  |
| C      | 8.102937  | -0.260338 | -0.016782 |
| O      | 6.508625  | -2.004469 | 0.143143  |
| C      | -8.102940 | 0.260341  | -0.016834 |
| O      | -6.508582 | 2.004429  | 0.143042  |
| C      | 8.418304  | 1.066282  | -0.348810 |

|   |            |           |           |
|---|------------|-----------|-----------|
| C | 9.149419   | -1.159417 | 0.245739  |
| C | -8.418390  | -1.066200 | -0.349115 |
| C | -9.149369  | 1.159402  | 0.245956  |
| C | 9.747806   | 1.483477  | -0.411078 |
| H | 7.634727   | 1.778957  | -0.581867 |
| C | 10.474821  | -0.741388 | 0.192142  |
| H | 8.889721   | -2.183777 | 0.489420  |
| C | -9.747913  | -1.483333 | -0.411351 |
| H | -7.634869  | -1.778861 | -0.582385 |
| C | -10.474792 | 0.741436  | 0.192378  |
| H | -8.889613  | 2.183701  | 0.489832  |
| C | 10.777788  | 0.583247  | -0.136201 |
| H | 9.978668   | 2.511086  | -0.675901 |
| H | 11.274149  | -1.445515 | 0.403973  |
| C | -10.777837 | -0.583119 | -0.136216 |
| H | -9.978839  | -2.510880 | -0.676362 |
| H | -11.274075 | 1.445551  | 0.404419  |
| H | 11.812426  | 0.911017  | -0.180352 |
| H | -11.812491 | -0.910842 | -0.180340 |

Compound **2a**

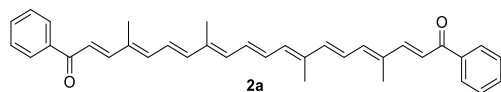

| Symbol | X         | Y         | Z         |
|--------|-----------|-----------|-----------|
| C      | 10.441666 | 0.201197  | -0.027022 |
| H      | 10.760966 | 1.236571  | -0.033536 |
| C      | 9.123849  | -0.116559 | -0.030413 |
| H      | 8.887594  | -1.179428 | -0.035184 |
| C      | 8.009614  | 0.804498  | -0.029051 |
| C      | 6.746757  | 0.271320  | -0.027984 |
| H      | 6.678374  | -0.816370 | -0.027901 |
| C      | 5.493720  | 0.964900  | -0.027578 |
| H      | 5.503407  | 2.050605  | -0.027829 |
| C      | 4.294168  | 0.312970  | -0.027234 |
| H      | 4.312781  | -0.776850 | -0.027233 |
| C      | 2.986518  | 0.919467  | -0.027037 |
| C      | 1.890218  | 0.090775  | -0.026803 |
| H      | 2.089448  | -0.980959 | -0.026798 |
| C      | 0.510240  | 0.455985  | -0.026689 |
| H      | 0.246905  | 1.511420  | -0.026681 |
| C      | -0.510237 | -0.455982 | -0.026683 |

|   |            |           |           |
|---|------------|-----------|-----------|
| H | -0.246903  | -1.511417 | -0.026712 |
| C | -1.890214  | -0.090769 | -0.026732 |
| H | -2.089443  | 0.980966  | -0.026698 |
| C | -2.986513  | -0.919459 | -0.026934 |
| C | -4.294165  | -0.312963 | -0.027036 |
| H | -4.312779  | 0.776858  | -0.027046 |
| C | -5.493718  | -0.964893 | -0.027270 |
| H | -5.503405  | -2.050598 | -0.027494 |
| C | -6.746754  | -0.271312 | -0.027608 |
| H | -6.678370  | 0.816378  | -0.027534 |
| C | -8.009610  | -0.804490 | -0.028633 |
| C | -9.123846  | 0.116566  | -0.030030 |
| H | -8.887591  | 1.179435  | -0.034755 |
| C | -10.441664 | -0.201109 | -0.026760 |
| H | -10.760957 | -1.236566 | -0.033346 |
| C | -11.463101 | 0.867144  | -0.046914 |
| C | 8.294642   | 2.285737  | -0.030090 |
| H | 8.877568   | 2.568074  | -0.914636 |
| H | 7.387676   | 2.890840  | -0.023560 |
| H | 8.889215   | 2.567229  | 0.846945  |
| C | 2.887994   | 2.425630  | -0.027194 |
| H | 1.857442   | 2.780298  | -0.027065 |
| H | 3.384933   | 2.847982  | 0.853847  |
| H | 3.384613   | 2.847739  | -0.908527 |
| C | -2.887984  | -2.425621 | -0.027075 |
| H | -3.385160  | -2.847780 | -0.908067 |
| H | -1.857431  | -2.780286 | -0.027595 |
| H | -3.384367  | -2.847926 | 0.854306  |
| C | -8.294633  | -2.285730 | -0.029671 |
| H | -8.877022  | -2.568183 | -0.914538 |
| H | -7.387668  | -2.890828 | -0.022502 |
| H | -8.889738  | -2.567110 | 0.847036  |
| C | 11.463107  | -0.867136 | -0.047147 |
| O | -11.144507 | 2.053840  | -0.135240 |
| C | -12.917913 | 0.492454  | 0.023887  |
| C | -13.859475 | 1.495853  | -0.256251 |
| C | -13.377207 | -0.787310 | 0.371096  |
| C | -15.222840 | 1.224824  | -0.205774 |
| H | -13.488672 | 2.482738  | -0.510739 |
| C | -14.744457 | -1.057097 | 0.430605  |
| H | -12.676021 | -1.576802 | 0.618781  |
| C | -15.669559 | -0.054473 | 0.137586  |
| H | -15.939954 | 2.008706  | -0.431633 |
| H | -15.086702 | -2.049917 | 0.707635  |
| H | -16.733894 | -0.267506 | 0.179513  |
| O | 11.144525  | -2.053824 | -0.135617 |

|   |           |           |           |
|---|-----------|-----------|-----------|
| C | 12.917910 | -0.492459 | 0.023925  |
| C | 13.859509 | -1.495780 | -0.256357 |
| C | 13.377154 | 0.787212  | 0.371550  |
| C | 15.222867 | -1.224758 | -0.205638 |
| H | 13.488744 | -2.482600 | -0.511155 |
| C | 14.744395 | 1.056986  | 0.431311  |
| H | 12.675929 | 1.576624  | 0.619378  |
| C | 15.669537 | 0.054446  | 0.138129  |
| H | 15.940013 | -2.008574 | -0.431621 |
| H | 15.086603 | 2.049728  | 0.708666  |
| H | 16.733866 | 0.267471  | 0.180250  |

Compound **3a**

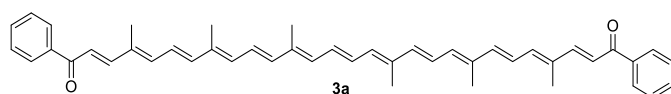

| Symbol | X         | Y         | Z         |
|--------|-----------|-----------|-----------|
| C      | 16.033794 | -1.173175 | -0.050754 |
| C      | 15.164659 | 0.020993  | -0.025151 |
| H      | 15.619265 | 1.004525  | -0.028761 |
| C      | 13.815655 | -0.117538 | -0.027429 |
| H      | 13.439690 | -1.139396 | -0.035377 |
| C      | 12.834589 | 0.943278  | -0.021345 |
| C      | 11.511508 | 0.583645  | -0.020174 |
| H      | 11.299220 | -0.485397 | -0.023258 |
| C      | 10.361496 | 1.436755  | -0.016219 |
| H      | 10.514370 | 2.511712  | -0.013783 |
| C      | 9.086229  | 0.948545  | -0.016001 |
| H      | 8.961939  | -0.134418 | -0.018644 |
| C      | 7.869015  | 1.720270  | -0.012973 |
| C      | 6.674140  | 1.042247  | -0.013302 |
| H      | 6.732657  | -0.046393 | -0.015509 |
| C      | 5.350890  | 1.582592  | -0.011399 |
| H      | 5.233344  | 2.662038  | -0.009810 |
| C      | 4.231639  | 0.797416  | -0.011762 |
| H      | 4.374488  | -0.283252 | -0.013223 |
| C      | 2.865391  | 1.250414  | -0.010613 |
| C      | 1.867481  | 0.303414  | -0.010959 |
| H      | 2.186456  | -0.739070 | -0.011723 |
| C      | 0.456662  | 0.510545  | -0.010611 |
| H      | 0.075963  | 1.529636  | -0.010501 |
| C      | -0.456661 | -0.510519 | -0.010587 |
| H      | -0.075963 | -1.529611 | -0.010549 |
| C      | -1.867479 | -0.303387 | -0.010815 |

|   |            |           |           |
|---|------------|-----------|-----------|
| H | -2.186455  | 0.739097  | -0.011532 |
| C | -2.865387  | -1.250389 | -0.010425 |
| C | -4.231637  | -0.797396 | -0.011522 |
| H | -4.374489  | 0.283271  | -0.012909 |
| C | -5.350886  | -1.582575 | -0.011227 |
| H | -5.233338  | -2.662021 | -0.009740 |
| C | -6.674137  | -1.042232 | -0.013088 |
| H | -6.732656  | 0.046408  | -0.015194 |
| C | -7.869010  | -1.720258 | -0.012825 |
| C | -9.086227  | -0.948536 | -0.015783 |
| H | -8.961940  | 0.134427  | -0.018325 |
| C | -10.361492 | -1.436750 | -0.016042 |
| H | -10.514363 | -2.511708 | -0.013717 |
| C | -11.511507 | -0.583643 | -0.019914 |
| H | -11.299221 | 0.485400  | -0.022919 |
| C | -12.834587 | -0.943279 | -0.021107 |
| C | -13.815654 | 0.117536  | -0.027175 |
| H | -13.439691 | 1.139395  | -0.034998 |
| C | -15.164658 | -0.021000 | -0.025047 |
| H | -15.619255 | -1.004536 | -0.028798 |
| C | 13.314436  | 2.373465  | -0.018051 |
| H | 13.928120  | 2.579348  | -0.902968 |
| H | 12.495848  | 3.093667  | -0.007279 |
| H | 13.942827  | 2.570412  | 0.858542  |
| C | 7.968632   | 3.226567  | -0.009821 |
| H | 6.992964   | 3.712613  | -0.007494 |
| H | 8.517327   | 3.578964  | 0.871401  |
| H | 8.515132   | 3.582831  | -0.890848 |
| C | 2.595488   | 2.735847  | -0.009204 |
| H | 3.040114   | 3.213208  | -0.890152 |
| H | 1.531120   | 2.970372  | -0.008471 |
| H | 3.040911   | 3.211647  | 0.872191  |
| C | -2.595473  | -2.735820 | -0.009094 |
| H | -3.039609  | -3.213057 | -0.890360 |
| H | -1.531103  | -2.970334 | -0.007793 |
| H | -3.041377  | -3.211751 | 0.871983  |
| C | -7.968622  | -3.226555 | -0.009812 |
| H | -8.515097  | -3.582740 | -0.890887 |
| H | -6.992953  | -3.712598 | -0.007502 |
| H | -8.517343  | -3.579033 | 0.871363  |
| C | -13.314429 | -2.373468 | -0.017926 |
| H | -13.927582 | -2.579473 | -0.903187 |
| H | -12.495844 | -3.093664 | -0.006555 |
| H | -13.943344 | -2.570300 | 0.858312  |
| O | 15.561105  | -2.307434 | -0.141707 |
| O | -15.561090 | 2.307445  | -0.141290 |

|   |            |           |           |
|---|------------|-----------|-----------|
| C | -16.033792 | 1.173169  | -0.050600 |
| C | 17.526205  | -0.995758 | 0.017537  |
| C | 18.325095  | -2.114154 | -0.269949 |
| C | 18.152891  | 0.209499  | 0.369339  |
| C | 19.712581  | -2.027539 | -0.222397 |
| H | 17.825267  | -3.041507 | -0.527646 |
| C | 19.544084  | 0.294437  | 0.425927  |
| H | 17.563602  | 1.083989  | 0.622916  |
| C | 20.326725  | -0.820952 | 0.125453  |
| H | 20.318257  | -2.898921 | -0.454020 |
| H | 20.016178  | 1.231445  | 0.706596  |
| C | -17.526212 | 0.995737  | 0.017470  |
| C | -18.325062 | 2.114255  | -0.269662 |
| C | -18.152948 | -0.209657 | 0.368702  |
| C | -19.712553 | 2.027635  | -0.222295 |
| H | -17.825195 | 3.041704  | -0.526936 |
| C | -19.544149 | -0.294608 | 0.425093  |
| H | -17.563702 | -1.084267 | 0.621968  |
| C | -20.326748 | 0.820911  | 0.124994  |
| H | -20.318195 | 2.899117  | -0.453629 |
| H | -20.016281 | -1.231731 | 0.705313  |
| H | 21.410073  | -0.751858 | 0.165134  |
| H | -21.410101 | 0.751811  | 0.164527  |

# Compound **2b**

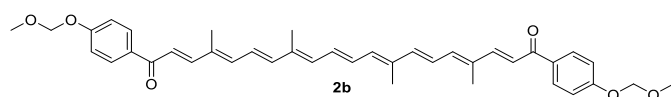

| Symbol | X          | Y         | Z         |
|--------|------------|-----------|-----------|
| C      | -10.437297 | -0.405436 | -0.129787 |
| H      | -10.732556 | -1.447824 | -0.136248 |
| C      | -9.126796  | -0.061048 | -0.134121 |
| H      | -8.912793  | 1.006489  | -0.134105 |
| C      | -7.993407  | -0.959458 | -0.138573 |
| C      | -6.741588  | -0.401581 | -0.138701 |
| H      | -6.694835  | 0.687255  | -0.135871 |
| C      | -5.474692  | -1.070144 | -0.141908 |
| H      | -5.463007  | -2.155873 | -0.144163 |
| C      | -4.288070  | -0.395242 | -0.141900 |
| H      | -4.327751  | 0.694032  | -0.139964 |
| C      | -2.968710  | -0.976189 | -0.143851 |
| C      | -1.888363  | -0.126947 | -0.143604 |
| H      | -2.108071  | 0.940806  | -0.142586 |
| C      | -0.501512  | -0.465524 | -0.144141 |

|   |            |           |           |
|---|------------|-----------|-----------|
| H | -0.218007  | -1.515758 | -0.144226 |
| C | 0.501508   | 0.465545  | -0.144180 |
| H | 0.218003   | 1.515779  | -0.144384 |
| C | 1.888359   | 0.126968  | -0.143570 |
| H | 2.108067   | -0.940785 | -0.142423 |
| C | 2.968708   | 0.976207  | -0.143882 |
| C | 4.288067   | 0.395257  | -0.141806 |
| H | 4.327743   | -0.694017 | -0.139776 |
| C | 5.474690   | 1.070156  | -0.141792 |
| H | 5.463009   | 2.155885  | -0.144143 |
| C | 6.741584   | 0.401588  | -0.138457 |
| H | 6.694827   | -0.687247 | -0.135557 |
| C | 7.993405   | 0.959461  | -0.138306 |
| C | 9.126790   | 0.061046  | -0.133809 |
| H | 8.912781   | -1.006489 | -0.133684 |
| C | 10.437293  | 0.405428  | -0.129590 |
| H | 10.732560  | 1.447813  | -0.136198 |
| C | 11.480773  | -0.644067 | -0.134302 |
| C | -8.248444  | -2.446196 | -0.142988 |
| H | -8.829951  | -2.737409 | -1.025622 |
| H | -7.329484  | -3.033016 | -0.142908 |
| H | -8.833052  | -2.742272 | 0.735968  |
| C | -2.841211  | -2.480231 | -0.145846 |
| H | -1.803996  | -2.814996 | -0.146518 |
| H | -3.329717  | -2.913187 | 0.734786  |
| H | -3.329995  | -2.910792 | -1.027507 |
| C | 2.841217   | 2.480250  | -0.146033 |
| H | 3.330298   | 2.910741  | -1.027561 |
| H | 1.804005   | 2.815021  | -0.147082 |
| H | 3.329432   | 2.913271  | 0.734731  |
| C | 8.248448   | 2.446197  | -0.142827 |
| H | 8.829386   | 2.737452  | -1.025826 |
| H | 7.329491   | 3.033023  | -0.142108 |
| H | 8.833626   | 2.742224  | 0.735762  |
| C | -11.480781 | 0.644055  | -0.134533 |
| O | 11.177102  | -1.838120 | -0.185565 |
| C | 12.924001  | -0.244794 | -0.086446 |
| C | 13.884235  | -1.260114 | -0.215925 |
| C | 13.377977  | 1.073050  | 0.097315  |
| C | 15.247362  | -0.989532 | -0.177404 |
| H | 13.528711  | -2.277577 | -0.337290 |
| C | 14.735740  | 1.362657  | 0.133876  |
| H | 12.676050  | 1.890279  | 0.220305  |
| C | 15.676521  | 0.335410  | -0.012304 |
| H | 15.967063  | -1.796309 | -0.238702 |
| H | 15.092032  | 2.378490  | 0.268387  |

|   |            |           |           |
|---|------------|-----------|-----------|
| O | -11.177115 | 1.838104  | -0.185902 |
| C | -12.924008 | 0.244785  | -0.086584 |
| C | -13.884245 | 1.260111  | -0.215986 |
| C | -13.377981 | -1.073059 | 0.097182  |
| C | -15.247372 | 0.989539  | -0.177376 |
| H | -13.528723 | 2.277574  | -0.337363 |
| C | -14.735744 | -1.362658 | 0.133828  |
| H | -12.676054 | -1.890299 | 0.220100  |
| C | -15.676528 | -0.335403 | -0.012268 |
| H | -15.967070 | 1.796323  | -0.238613 |
| H | -15.092033 | -2.378492 | 0.268341  |
| O | -16.990628 | -0.725886 | 0.028187  |
| O | 16.990621  | 0.725896  | 0.028069  |
| C | 17.988873  | -0.173605 | -0.437921 |
| H | 18.872231  | 0.463680  | -0.576701 |
| H | 17.681534  | -0.622433 | -1.388128 |
| C | -17.988917 | 0.173631  | -0.437692 |
| H | -18.872281 | -0.463655 | -0.576434 |
| H | -17.681652 | 0.622501  | -1.387903 |
| O | 18.255105  | -1.232700 | 0.426494  |
| O | -18.255099 | 1.232685  | 0.426789  |
| C | 18.823267  | -0.835220 | 1.670792  |
| H | 18.130681  | -0.215424 | 2.250544  |
| H | 19.039737  | -1.751300 | 2.222600  |
| H | 19.757930  | -0.276431 | 1.517604  |
| C | -18.823165 | 0.835145  | 1.671112  |
| H | -18.130528 | 0.215334  | 2.250787  |
| H | -19.039608 | 1.751198  | 2.222975  |
| H | -19.757831 | 0.276349  | 1.517968  |

### Compound 3b

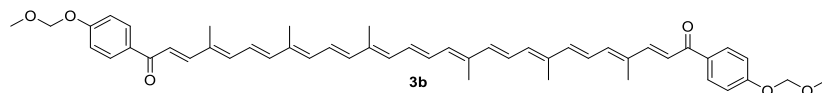

| Symbol | X         | Y         | Z        |
|--------|-----------|-----------|----------|
| C      | 16.069633 | 0.636710  | 0.212364 |
| C      | 15.159094 | -0.526348 | 0.135081 |
| H      | 15.576737 | -1.525354 | 0.096986 |
| C      | 13.816445 | -0.340699 | 0.132285 |
| H      | 13.476647 | 0.692614  | 0.180453 |
| C      | 12.798571 | -1.365647 | 0.072890 |
| C      | 11.488917 | -0.961115 | 0.077265 |
| H      | 11.313059 | 0.113442  | 0.125439 |



|   |            |           |           |
|---|------------|-----------|-----------|
| C | 10.310362  | -1.773471 | 0.026762  |
| H | 10.427123  | -2.851890 | -0.021931 |
| C | 9.052220   | -1.243348 | 0.037841  |
| H | 8.963659   | -0.157995 | 0.087257  |
| C | 7.810036   | -1.973229 | -0.009061 |
| C | 6.637949   | -1.257082 | 0.011798  |
| H | 6.731789   | -0.172094 | 0.062671  |
| C | 5.297777   | -1.753035 | -0.024592 |
| H | 5.145448   | -2.826979 | -0.074817 |
| C | 4.204338   | -0.932819 | 0.001435  |
| H | 4.381664   | 0.141557  | 0.051928  |
| C | 2.824260   | -1.340768 | -0.031019 |
| C | 1.856935   | -0.363210 | 0.003132  |
| H | 2.208884   | 0.667423  | 0.053038  |
| C | 0.440236   | -0.524432 | -0.018518 |
| H | 0.027307   | -1.529709 | -0.067847 |
| C | -0.440237  | 0.524367  | 0.019585  |
| H | -0.027307  | 1.529645  | 0.068895  |
| C | -1.856936  | 0.363146  | -0.002063 |
| H | -2.208885  | -0.667486 | -0.051986 |
| C | -2.824261  | 1.340704  | 0.032101  |
| C | -4.204338  | 0.932756  | -0.000397 |
| H | -4.381664  | -0.141621 | -0.050855 |
| C | -5.297776  | 1.752978  | 0.025521  |
| H | -5.145445  | 2.826926  | 0.075655  |
| C | -6.637948  | 1.257028  | -0.010922 |
| H | -6.731789  | 0.172039  | -0.061768 |
| C | -7.810033  | 1.973181  | 0.009839  |
| C | -9.052217  | 1.243308  | -0.037189 |
| H | -8.963657  | 0.157951  | -0.086523 |
| C | -10.310355 | 1.773443  | -0.026359 |
| H | -10.427113 | 2.851868  | 0.022210  |
| C | -11.488910 | 0.961095  | -0.076988 |
| H | -11.313055 | -0.113468 | -0.125052 |
| C | -12.798561 | 1.365640  | -0.072848 |
| C | -13.816436 | 0.340698  | -0.132319 |
| H | -13.476640 | -0.692622 | -0.180363 |
| C | -15.159083 | 0.526359  | -0.135320 |
| H | -15.576723 | 1.525371  | -0.097363 |
| C | 13.228927  | -2.810196 | 0.010709  |
| H | 13.829899  | -3.074452 | 0.888838  |
| H | 12.386248  | -3.500706 | -0.034424 |
| H | 13.855601  | -2.991173 | -0.870563 |
| C | 7.860354   | -3.480439 | -0.078143 |
| H | 6.869408   | -3.933356 | -0.111354 |
| H | 8.406941   | -3.811601 | -0.968866 |

|   |            |           |           |
|---|------------|-----------|-----------|
| H | 8.385349   | -3.893107 | 0.791298  |
| C | 2.507092   | -2.815236 | -0.100564 |
| H | 2.927229   | -3.344975 | 0.762301  |
| H | 1.435817   | -3.014860 | -0.121071 |
| H | 2.946142   | -3.266065 | -0.998148 |
| C | -2.507097  | 2.815172  | 0.101633  |
| H | -2.946651  | 3.266126  | 0.998903  |
| H | -1.435830  | 3.014775  | 0.122739  |
| H | -2.926729  | 3.344811  | -0.761544 |
| C | -7.860350  | 3.480395  | 0.078851  |
| H | -8.407694  | 3.811584  | 0.969095  |
| H | -6.869415  | 3.933271  | 0.112938  |
| H | -8.384577  | 3.893079  | -0.791051 |
| C | -13.228912 | 2.810198  | -0.010843 |
| H | -13.855697 | 2.991255  | 0.870335  |
| H | -12.386234 | 3.500706  | 0.034339  |
| H | -13.829771 | 3.074385  | -0.889070 |
| O | 15.627413  | 1.782631  | 0.323420  |
| O | -15.627402 | -1.782622 | -0.323633 |
| C | -16.069623 | -0.636694 | -0.212656 |
| C | 17.550837  | 0.412965  | 0.167203  |
| C | 18.383319  | 1.520605  | 0.389510  |
| C | 18.158610  | -0.825712 | -0.102156 |
| C | 19.769288  | 1.413727  | 0.360798  |
| H | 17.909164  | 2.478144  | 0.575777  |
| C | 19.541445  | -0.952062 | -0.131300 |
| H | 17.558515  | -1.706804 | -0.300487 |
| C | 20.353003  | 0.163676  | 0.109300  |
| H | 20.388733  | 2.291625  | 0.495857  |
| H | 20.016231  | -1.906606 | -0.332338 |
| C | -17.550830 | -0.412932 | -0.167688 |
| C | -18.383296 | -1.520550 | -0.390159 |
| C | -18.158621 | 0.825739  | 0.101659  |
| C | -19.769268 | -1.413655 | -0.361624 |
| H | -17.909132 | -2.478087 | -0.576408 |
| C | -19.541459 | 0.952105  | 0.130632  |
| H | -17.558539 | 1.706810  | 0.300121  |
| C | -20.353000 | -0.163609 | -0.110135 |
| H | -20.388706 | -2.291539 | -0.496809 |
| H | -20.016258 | 1.906643  | 0.331665  |
| O | 21.704742  | -0.066992 | 0.068528  |
| O | -21.704740 | 0.067075  | -0.069527 |
| C | 22.583252  | 0.901718  | 0.626819  |
| H | 23.533081  | 0.361971  | 0.737798  |
| H | 22.210786  | 1.235413  | 1.600861  |
| C | -22.583191 | -0.901606 | -0.627962 |

|   |            |           |           |
|---|------------|-----------|-----------|
| H | -23.533010 | -0.361853 | -0.739014 |
| H | -22.210622 | -1.235249 | -1.601982 |
| O | -22.737490 | -2.050033 | 0.145163  |
| O | 22.737475  | 2.050104  | -0.146384 |
| C | 23.365368  | 1.820583  | -1.404116 |
| H | 22.757418  | 1.173979  | -2.046178 |
| H | 23.482296  | 2.796442  | -1.878055 |
| H | 24.356147  | 1.361703  | -1.273112 |
| C | -23.365499 | -1.820580 | 1.402849  |
| H | -23.482490 | -2.796467 | 1.876715  |
| H | -22.757600 | -1.174027 | 2.045010  |
| H | -24.356257 | -1.361674 | 1.271779  |

# Compound 2c

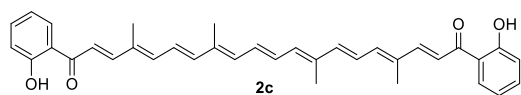

| Symbol | X          | Y         | Z         |
|--------|------------|-----------|-----------|
| C      | -10.430585 | -0.432662 | 0.000051  |
| H      | -10.720654 | -1.475158 | -0.000083 |
| C      | -9.118945  | -0.084212 | 0.000193  |
| H      | -8.902133  | 0.982268  | 0.000299  |
| C      | -7.988253  | -0.983046 | 0.000178  |
| C      | -6.736245  | -0.423162 | 0.000221  |
| H      | -6.690710  | 0.665704  | 0.000303  |
| C      | -5.469506  | -1.089921 | 0.000163  |
| H      | -5.455512  | -2.175498 | 0.000036  |
| C      | -4.284500  | -0.411196 | 0.000225  |
| H      | -4.327526  | 0.677901  | 0.000306  |
| C      | -2.964072  | -0.988394 | 0.000160  |
| C      | -1.887160  | -0.134276 | 0.000116  |
| H      | -2.111009  | 0.932543  | 0.000175  |
| C      | -0.499491  | -0.467879 | -0.000022 |
| H      | -0.211908  | -1.516915 | -0.000103 |
| C      | 0.499485   | 0.467822  | -0.000078 |
| H      | 0.211902   | 1.516857  | 0.000003  |
| C      | 1.887154   | 0.134218  | -0.000217 |
| H      | 2.111003   | -0.932600 | -0.000276 |
| C      | 2.964066   | 0.988336  | -0.000260 |
| C      | 4.284494   | 0.411139  | -0.000323 |
| H      | 4.327519   | -0.677959 | -0.000406 |
| C      | 5.469500   | 1.089863  | -0.000255 |
| H      | 5.455506   | 2.175440  | -0.000125 |
| C      | 6.736238   | 0.423103  | -0.000312 |

|   |            |           |           |
|---|------------|-----------|-----------|
| H | 6.690702   | -0.665762 | -0.000396 |
| C | 7.988247   | 0.982987  | -0.000262 |
| C | 9.118938   | 0.084151  | -0.000271 |
| H | 8.902124   | -0.982329 | -0.000385 |
| C | 10.430578  | 0.432600  | -0.000119 |
| H | 10.720654  | 1.475095  | 0.000024  |
| C | 11.474713  | -0.601983 | -0.000128 |
| C | -8.242416  | -2.469897 | 0.000061  |
| H | -8.824052  | -2.764558 | -0.881283 |
| H | -7.322769  | -3.055444 | 0.000466  |
| H | -8.824821  | -2.764546 | 0.880892  |
| C | -2.831354  | -2.491860 | 0.000071  |
| H | -1.793051  | -2.823061 | 0.000685  |
| H | -3.318803  | -2.925308 | 0.880975  |
| H | -3.317747  | -2.925122 | -0.881514 |
| C | 2.831347   | 2.491802  | -0.000170 |
| H | 3.318812   | 2.925252  | -0.881064 |
| H | 1.793044   | 2.823003  | -0.000803 |
| H | 3.317724   | 2.925063  | 0.881424  |
| C | 8.242412   | 2.469837  | -0.000140 |
| H | 8.824838   | 2.764484  | -0.880958 |
| H | 7.322765   | 3.055385  | -0.000569 |
| H | 8.824027   | 2.764498  | 0.881217  |
| C | -11.474722 | 0.601924  | 0.000056  |
| O | 11.142767  | -1.811893 | -0.000237 |
| C | 12.904438  | -0.231713 | 0.000064  |
| C | 13.881120  | -1.273212 | 0.000155  |
| C | 13.361149  | 1.104664  | 0.000157  |
| C | 15.249946  | -0.949305 | 0.000313  |
| C | 14.710878  | 1.413784  | 0.000315  |
| H | 12.643447  | 1.916849  | 0.000094  |
| C | 15.655445  | 0.374633  | 0.000393  |
| H | 15.964004  | -1.765822 | 0.000372  |
| H | 15.034235  | 2.449438  | 0.000378  |
| O | -11.142804 | 1.811840  | 0.000259  |
| C | -12.904452 | 0.231702  | -0.000031 |
| C | -13.881021 | 1.273289  | 0.000045  |
| C | -13.361281 | -1.104634 | -0.000195 |
| C | -15.249880 | 0.949526  | -0.000056 |
| C | -14.711043 | -1.413620 | -0.000290 |
| H | -12.643659 | -1.916888 | -0.000253 |
| C | -15.655508 | -0.374374 | -0.000223 |
| H | -15.963855 | 1.766115  | 0.000011  |
| H | -15.034502 | -2.449242 | -0.000418 |
| H | 16.716418  | 0.608623  | 0.000519  |
| H | -16.716504 | -0.608259 | -0.000298 |

|   |            |           |          |
|---|------------|-----------|----------|
| H | -12.543785 | 2.582979  | 0.000346 |
| H | 12.544062  | -2.583075 | 0.000027 |
| O | -13.544149 | 2.566568  | 0.000232 |
| O | 13.544427  | -2.566533 | 0.000108 |

Compound **2d**

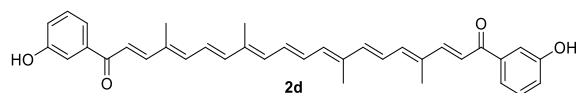

| Symbol | X          | Y         | Z         |
|--------|------------|-----------|-----------|
| C      | 10.443909  | -0.006138 | -0.072841 |
| H      | 10.783144  | 1.022714  | -0.080358 |
| C      | 9.120324   | -0.299027 | -0.075317 |
| H      | 8.863389   | -1.357108 | -0.079004 |
| C      | 8.024311   | 0.643652  | -0.074096 |
| C      | 6.751264   | 0.135203  | -0.072344 |
| H      | 6.661466   | -0.950939 | -0.071682 |
| C      | 5.512208   | 0.853456  | -0.071857 |
| H      | 5.543636   | 1.938738  | -0.072457 |
| C      | 4.299821   | 0.225710  | -0.071026 |
| H      | 4.296497   | -0.864271 | -0.070717 |
| C      | 3.004661   | 0.858455  | -0.070727 |
| C      | 1.891723   | 0.052236  | -0.070309 |
| H      | 2.069120   | -1.023334 | -0.070194 |
| C      | 0.519461   | 0.445453  | -0.070194 |
| H      | 0.277713   | 1.506046  | -0.070248 |
| C      | -0.519454  | -0.445463 | -0.070183 |
| H      | -0.277706  | -1.506056 | -0.070194 |
| C      | -1.891716  | -0.052246 | -0.070322 |
| H      | -2.069113  | 1.023324  | -0.070245 |
| C      | -3.004655  | -0.858464 | -0.070719 |
| C      | -4.299814  | -0.225720 | -0.071037 |
| H      | -4.296490  | 0.864261  | -0.070772 |
| C      | -5.512202  | -0.853465 | -0.071828 |
| H      | -5.543629  | -1.938748 | -0.072380 |
| C      | -6.751257  | -0.135212 | -0.072334 |
| H      | -6.661459  | 0.950929  | -0.071725 |
| C      | -8.024304  | -0.643661 | -0.074050 |
| C      | -9.120317  | 0.299019  | -0.075320 |
| H      | -8.863382  | 1.357099  | -0.079046 |
| C      | -10.443902 | 0.006130  | -0.072853 |
| H      | -10.783131 | -1.022724 | -0.080333 |
| C      | -11.44486  | 1.093074  | -0.091836 |

|   |            |           |           |
|---|------------|-----------|-----------|
| C | 8.338437   | 2.118972  | -0.075869 |
| H | 8.926072   | 2.389538  | -0.960940 |
| H | 7.443540   | 2.741777  | -0.068681 |
| H | 8.939414   | 2.388976  | 0.800341  |
| C | 2.936646   | 2.366309  | -0.071032 |
| H | 1.913481   | 2.741771  | -0.070372 |
| H | 3.442541   | 2.778607  | 0.809669  |
| H | 3.441254   | 2.778193  | -0.952668 |
| C | -2.936639  | -2.366318 | -0.070969 |
| H | -3.441342  | -2.778238 | -0.952534 |
| H | -1.913475  | -2.741781 | -0.070407 |
| H | -3.442440  | -2.778582 | 0.809803  |
| C | -8.338430  | -2.118981 | -0.075752 |
| H | -8.925970  | -2.389613 | -0.960866 |
| H | -7.443534  | -2.741786 | -0.068420 |
| H | -8.939502  | -2.388921 | 0.800413  |
| C | 11.444869  | -1.093081 | -0.091777 |
| O | -11.106066 | 2.273943  | -0.177926 |
| C | -12.908155 | 0.745126  | -0.022948 |
| C | -13.831050 | 1.764200  | -0.310855 |
| C | -13.374158 | -0.526845 | 0.329212  |
| C | -15.194870 | 1.502205  | -0.258183 |
| H | -13.449711 | 2.744759  | -0.569851 |
| C | -14.747524 | -0.780926 | 0.388931  |
| H | -12.701845 | -1.336956 | 0.584916  |
| C | -15.662183 | 0.232450  | 0.090063  |
| H | -15.909146 | 2.287565  | -0.487372 |
| O | 11.106087  | -2.273952 | -0.177877 |
| C | 12.908157  | -0.745118 | -0.022846 |
| C | 13.831075  | -1.764137 | -0.310875 |
| C | 13.374128  | 0.526818  | 0.329484  |
| C | 15.194889  | -1.502118 | -0.258161 |
| H | 13.449760  | -2.744674 | -0.569994 |
| C | 14.747489  | 0.780920  | 0.389249  |
| H | 12.701789  | 1.336874  | 0.585296  |
| C | 15.662171  | -0.232398 | 0.090253  |
| H | 15.909184  | -2.287432 | -0.487449 |
| H | 16.730697  | -0.031392 | 0.132560  |
| H | -16.730714 | 0.031462  | 0.132338  |
| O | -15.131710 | -2.044108 | 0.747601  |
| H | -16.096636 | -2.089550 | 0.760778  |
| O | 15.131647  | 2.044061  | 0.748091  |
| H | 16.096571  | 2.089516  | 0.761296  |

---

Compound **2e**

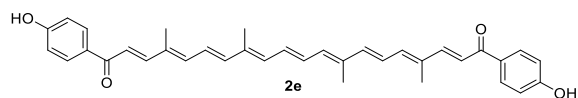

| Symbol | X          | Y         | Z         |
|--------|------------|-----------|-----------|
| C      | -10.443459 | -0.185009 | -0.022040 |
| H      | -10.760010 | -1.221118 | -0.025769 |
| C      | -9.125959  | 0.131850  | -0.025651 |
| H      | -8.889522  | 1.194626  | -0.027599 |
| C      | -8.011826  | -0.790219 | -0.027307 |
| C      | -6.748528  | -0.258747 | -0.027813 |
| H      | -6.678835  | 0.828866  | -0.027041 |
| C      | -5.496059  | -0.953904 | -0.029247 |
| H      | -5.507338  | -2.039629 | -0.029954 |
| C      | -4.295442  | -0.304200 | -0.029630 |
| H      | -4.312064  | 0.785671  | -0.029064 |
| C      | -2.988703  | -0.912989 | -0.030533 |
| C      | -1.890612  | -0.086803 | -0.030611 |
| H      | -2.087595  | 0.985370  | -0.030265 |
| C      | -0.511273  | -0.454789 | -0.030880 |
| H      | -0.250173  | -1.510807 | -0.030918 |
| C      | 0.511274   | 0.454789  | -0.030888 |
| H      | 0.250174   | 1.510807  | -0.030941 |
| C      | 1.890613   | 0.086803  | -0.030617 |
| H      | 2.087595   | -0.985371 | -0.030256 |
| C      | 2.988704   | 0.912988  | -0.030554 |
| C      | 4.295443   | 0.304199  | -0.029646 |
| H      | 4.312064   | -0.785672 | -0.029063 |
| C      | 5.496060   | 0.953903  | -0.029277 |
| H      | 5.507339   | 2.039627  | -0.030000 |
| C      | 6.748529   | 0.258745  | -0.027836 |
| H      | 6.678835   | -0.828868 | -0.027044 |
| C      | 8.011827   | 0.790216  | -0.027343 |
| C      | 9.125959   | -0.131853 | -0.025668 |
| H      | 8.889521   | -1.194629 | -0.027601 |
| C      | 10.443459  | 0.185005  | -0.022054 |
| H      | 10.760012  | 1.221114  | -0.025798 |
| C      | 11.464379  | -0.885860 | -0.028876 |
| C      | -8.298031  | -2.271279 | -0.028702 |
| H      | -8.885182  | -2.552181 | -0.910939 |
| H      | -7.391581  | -2.877220 | -0.027044 |
| H      | -8.888904  | -2.553230 | 0.850707  |
| C      | -2.893108  | -2.419381 | -0.031203 |
| H      | -1.863225  | -2.776036 | -0.031683 |
| H      | -3.390517  | -2.841076 | 0.849906  |
| H      | -3.391026  | -2.840284 | -0.912406 |

|   |            |           |           |
|---|------------|-----------|-----------|
| C | 2.893109   | 2.419380  | -0.031247 |
| H | 3.391019   | 2.840270  | -0.912460 |
| H | 1.863226   | 2.776035  | -0.031722 |
| H | 3.390526   | 2.841089  | 0.849851  |
| C | 8.298034   | 2.271276  | -0.028763 |
| H | 8.885224   | 2.552154  | -0.910982 |
| H | 7.391584   | 2.877218  | -0.027164 |
| H | 8.888868   | 2.553250  | 0.850665  |
| C | -11.464379 | 0.885856  | -0.028881 |
| O | 11.135817  | -2.073838 | -0.075616 |
| C | 12.915376  | -0.518132 | 0.013187  |
| C | 13.850698  | -1.559692 | -0.103049 |
| C | 13.401580  | 0.791529  | 0.170657  |
| C | 15.215399  | -1.310566 | -0.071723 |
| H | 13.471405  | -2.569117 | -0.218223 |
| C | 14.765508  | 1.055412  | 0.207694  |
| H | 12.717785  | 1.626076  | 0.277998  |
| C | 15.679633  | 0.002938  | 0.083875  |
| H | 15.925557  | -2.129639 | -0.166728 |
| H | 15.142142  | 2.064894  | 0.332745  |
| O | -11.135815 | 2.073834  | -0.075597 |
| C | -12.915376 | 0.518130  | 0.013176  |
| C | -13.850695 | 1.559700  | -0.102998 |
| C | -13.401586 | -0.791537 | 0.170575  |
| C | -15.215397 | 1.310579  | -0.071676 |
| H | -13.471398 | 2.569130  | -0.218122 |
| C | -14.765515 | -1.055417 | 0.207605  |
| H | -12.717795 | -1.626095 | 0.277860  |
| C | -15.679636 | -0.002931 | 0.083851  |
| H | -15.925552 | 2.129661  | -0.166631 |
| H | -15.142152 | -2.064904 | 0.332599  |
| O | -17.005157 | -0.314219 | 0.122911  |
| O | 17.005153  | 0.314229  | 0.122943  |
| H | -17.524720 | 0.495581  | 0.030266  |
| H | 17.524719  | -0.495563 | 0.030252  |

Compound **2f**

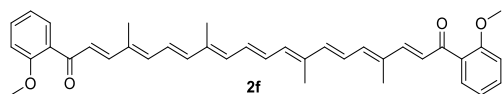

| Symbol | X          | Y         | Z         |
|--------|------------|-----------|-----------|
| C      | -10.446800 | 0.078102  | -0.124140 |
| H      | -10.803700 | -0.942340 | -0.105220 |



|   |           |           |           |
|---|-----------|-----------|-----------|
| C | -9.123390 | 0.371498  | -0.127120 |
| H | -8.860460 | 1.427843  | -0.134280 |
| C | -8.031260 | -0.576770 | -0.121300 |
| C | -6.754790 | -0.077620 | -0.122110 |
| H | -6.657360 | 1.007889  | -0.125330 |
| C | -5.520520 | -0.804670 | -0.120070 |
| H | -5.560270 | -1.889770 | -0.118560 |
| C | -4.302910 | -0.187300 | -0.120800 |
| H | -4.290380 | 0.902641  | -0.122500 |
| C | -3.012920 | -0.830770 | -0.119870 |
| C | -1.892470 | -0.035110 | -0.120370 |
| H | -2.060140 | 1.042067  | -0.121160 |
| C | -0.523670 | -0.440500 | -0.120160 |
| H | -0.291520 | -1.503290 | -0.120150 |
| C | 0.523672  | 0.440496  | -0.120170 |
| H | 0.291521  | 1.503289  | -0.120090 |
| C | 1.892473  | 0.035107  | -0.120470 |
| H | 2.060140  | -1.042070 | -0.121330 |
| C | 3.012915  | 0.830771  | -0.119990 |
| C | 4.302910  | 0.187295  | -0.121040 |
| H | 4.290373  | -0.902650 | -0.122790 |
| C | 5.520517  | 0.804658  | -0.120350 |
| H | 5.560271  | 1.889765  | -0.118790 |
| C | 6.754788  | 0.077611  | -0.122500 |
| H | 6.657355  | -1.007900 | -0.125770 |
| C | 8.031255  | 0.576751  | -0.121740 |
| C | 9.123389  | -0.371502 | -0.127670 |
| H | 8.860456  | -1.427860 | -0.134870 |
| C | 10.446800 | -0.078120 | -0.124750 |
| H | 10.803650 | 0.942315  | -0.105800 |
| C | 11.444590 | -1.167430 | -0.162120 |
| C | -8.354730 | -2.050120 | -0.116480 |
| H | -8.942810 | -2.320480 | -1.001240 |
| H | -7.464060 | -2.679040 | -0.103470 |
| H | -8.961190 | -2.309660 | 0.758968  |
| C | -2.957980 | -2.339270 | -0.118570 |
| H | -1.938070 | -2.723590 | -0.117720 |
| H | -3.467310 | -2.746290 | 0.762666  |
| H | -3.466500 | -2.747770 | -0.999570 |
| C | 2.957978  | 2.339264  | -0.118610 |
| H | 3.466420  | 2.747811  | -0.999640 |
| H | 1.938074  | 2.723588  | -0.117650 |
| H | 3.467393  | 2.746238  | 0.762599  |
| C | 8.354735  | 2.050108  | -0.116860 |

|   |           |           |           |
|---|-----------|-----------|-----------|
| H | 8.942787  | 2.320498  | -1.001640 |
| H | 7.464064  | 2.679031  | -0.103810 |
| H | 8.961218  | 2.309604  | 0.758574  |
| C | -11.44460 | 1.167405  | -0.161400 |
| O | 11.09686  | -2.346230 | -0.253670 |
| C | 12.91901  | -0.848380 | -0.177280 |
| C | 13.74378  | -1.801360 | -0.792450 |
| C | 13.53260  | 0.295715  | 0.388158  |
| C | 15.12106  | -1.634190 | -0.891960 |
| H | 13.25723  | -2.684320 | -1.192330 |
| C | 14.92071  | 0.465062  | 0.295888  |
| C | 15.70514  | -0.492230 | -0.346700 |
| H | 15.73019  | -2.383960 | -1.386480 |
| H | 15.39684  | 1.336077  | 0.728525  |
| O | -11.09690 | 2.346212  | -0.252920 |
| C | -12.91900 | 0.848365  | -0.176420 |
| C | -13.74380 | 1.801327  | -0.791550 |
| C | -13.53260 | -0.295700 | 0.389135  |
| C | -15.12110 | 1.634162  | -0.890940 |
| H | -13.25730 | 2.684257  | -1.191530 |
| C | -14.92070 | -0.465030 | 0.296993  |
| C | -15.70520 | 0.492234  | -0.345570 |
| H | -15.73030 | 2.383911  | -1.385440 |
| H | -15.39680 | -1.336020 | 0.729721  |
| H | 16.77880  | -0.339770 | -0.411110 |
| H | -16.77880 | 0.339780  | -0.409880 |
| O | -12.72580 | -1.186170 | 1.040561  |
| O | 12.72590  | 1.186218  | 1.039597  |
| C | 13.31507  | 2.310785  | 1.675905  |
| H | 14.03055  | 2.006422  | 2.449327  |
| H | 13.81914  | 2.968110  | 0.956566  |
| H | 12.49155  | 2.853383  | 2.142079  |
| C | -13.31500 | -2.310690 | 1.676982  |
| H | -14.03040 | -2.006270 | 2.450442  |
| H | -13.81910 | -2.968050 | 0.957721  |
| H | -12.49140 | -2.853280 | 2.143120  |

Compound **2g**

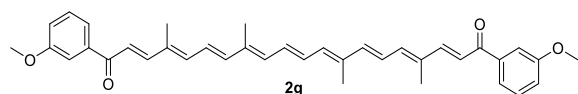

| Symbol | X | Y | Z |
|--------|---|---|---|
|--------|---|---|---|

|   |            |           |           |
|---|------------|-----------|-----------|
| C | 10.442347  | -0.206177 | -0.118331 |
| H | 10.801037  | 0.816073  | -0.123474 |
| C | 9.113626   | -0.474051 | -0.122292 |
| H | 8.836822   | -1.527103 | -0.127924 |
| C | 8.035416   | 0.489190  | -0.120450 |
| C | 6.752976   | 0.005145  | -0.120237 |
| H | 6.642491   | -1.079089 | -0.121071 |
| C | 5.527758   | 0.746907  | -0.119593 |
| H | 5.579914   | 1.831401  | -0.119163 |
| C | 4.303565   | 0.142592  | -0.119826 |
| H | 4.279282   | -0.947127 | -0.120422 |
| C | 3.020763   | 0.800120  | -0.119495 |
| C | 1.892437   | 0.015628  | -0.119654 |
| H | 2.049006   | -1.063178 | -0.119941 |
| C | 0.527998   | 0.435290  | -0.119566 |
| H | 0.306818   | 1.500369  | -0.119549 |
| C | -0.527996  | -0.435289 | -0.119569 |
| H | -0.306816  | -1.500368 | -0.119548 |
| C | -1.892434  | -0.015626 | -0.119668 |
| H | -2.049003  | 1.063179  | -0.119956 |
| C | -3.020760  | -0.800118 | -0.119516 |
| C | -4.303562  | -0.142590 | -0.119850 |
| H | -4.279279  | 0.947128  | -0.120449 |
| C | -5.527755  | -0.746906 | -0.119612 |
| H | -5.579911  | -1.831400 | -0.119176 |
| C | -6.752973  | -0.005144 | -0.120256 |
| H | -6.642488  | 1.079090  | -0.121098 |
| C | -8.035413  | -0.489189 | -0.120464 |
| C | -9.113623  | 0.474052  | -0.122317 |
| H | -8.836819  | 1.527104  | -0.127950 |
| C | -10.442344 | 0.206178  | -0.118366 |
| H | -10.801032 | -0.816072 | -0.123508 |
| C | -11.422987 | 1.311997  | -0.137806 |
| C | 8.377494   | 1.958279  | -0.119908 |
| H | 8.970823   | 2.218821  | -1.004192 |
| H | 7.494599   | 2.597998  | -0.112386 |
| H | 8.982964   | 2.215483  | 0.757067  |
| C | 2.981866   | 2.309016  | -0.119034 |
| H | 1.966147   | 2.704195  | -0.118699 |
| H | 3.495173   | 2.711026  | 0.762146  |
| H | 3.494824   | 2.711552  | -1.000176 |
| C | -2.981863  | -2.309015 | -0.119053 |
| H | -3.494864  | -2.711553 | -1.000168 |
| H | -1.966144  | -2.704194 | -0.118768 |
| H | -3.495127  | -2.711023 | 0.762153  |
| C | -8.377491  | -1.958278 | -0.119912 |

|   |            |           |           |
|---|------------|-----------|-----------|
| H | -8.970771  | -2.218839 | -1.004225 |
| H | -7.494596  | -2.597997 | -0.112327 |
| H | -8.983009  | -2.215464 | 0.757034  |
| C | 11.422991  | -1.311995 | -0.137764 |
| O | -11.061243 | 2.486008  | -0.224824 |
| C | -12.892081 | 0.992524  | -0.067675 |
| C | -13.797982 | 2.031004  | -0.347746 |
| C | -13.383413 | -0.268620 | 0.278254  |
| C | -15.163423 | 1.791395  | -0.291545 |
| H | -13.400083 | 3.005960  | -0.603133 |
| C | -14.763694 | -0.503480 | 0.342547  |
| H | -12.728169 | -1.094845 | 0.527190  |
| C | -15.661302 | 0.528579  | 0.051930  |
| H | -15.863924 | 2.591079  | -0.514552 |
| O | 11.061248  | -2.486007 | -0.224791 |
| C | 12.892082  | -0.992521 | -0.067609 |
| C | 13.797990  | -2.030986 | -0.347713 |
| C | 13.383406  | 0.268610  | 0.278379  |
| C | 15.163430  | -1.791374 | -0.291489 |
| H | 13.400098  | -3.005934 | -0.603142 |
| C | 14.763685  | 0.503473  | 0.342696  |
| H | 12.728154  | 1.094820  | 0.527346  |
| C | 15.661300  | -0.528570 | 0.052043  |
| H | 15.863936  | -2.591045 | -0.514523 |
| H | 16.731761  | -0.366139 | 0.091609  |
| H | -16.731764 | 0.366151  | 0.091478  |
| O | -15.125281 | -1.772611 | 0.699262  |
| O | 15.125264  | 1.772590  | 0.699470  |
| C | -16.508424 | -2.074365 | 0.791213  |
| H | -16.569038 | -3.121848 | 1.089887  |
| H | -17.009512 | -1.454907 | 1.546157  |
| H | -17.017272 | -1.944972 | -0.172721 |
| C | 16.508405  | 2.074344  | 0.791450  |
| H | 17.017265  | 1.944996  | -0.172483 |
| H | 16.569012  | 3.121814  | 1.090172  |
| H | 17.009486  | 1.454854  | 1.546373  |

# Compound 2h

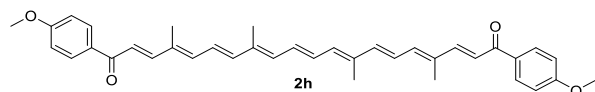

| Symbol | X         | Y        | Z         |
|--------|-----------|----------|-----------|
| C      | 10.442772 | 0.243212 | -0.021907 |
| H      | 10.753263 | 1.281164 | -0.026335 |

|   |            |           |           |
|---|------------|-----------|-----------|
| C | 9.127286   | -0.081474 | -0.025622 |
| H | 8.897208   | -1.145658 | -0.026989 |
| C | 8.007620   | 0.834060  | -0.028053 |
| C | 6.747408   | 0.295440  | -0.028504 |
| H | 6.683907   | -0.792554 | -0.027158 |
| C | 5.490962   | 0.983504  | -0.030527 |
| H | 5.496196   | 2.069283  | -0.031683 |
| C | 4.293933   | 0.327270  | -0.030886 |
| H | 4.316487   | -0.762499 | -0.029860 |
| C | 2.983854   | 0.928914  | -0.032205 |
| C | 1.890185   | 0.096916  | -0.032057 |
| H | 2.092912   | -0.974194 | -0.031399 |
| C | 0.508861   | 0.457473  | -0.032383 |
| H | 0.242115   | 1.512089  | -0.032531 |
| C | -0.508853  | -0.457492 | -0.032248 |
| H | -0.242106  | -1.512107 | -0.032197 |
| C | -1.890177  | -0.096936 | -0.031926 |
| H | -2.092905  | 0.974174  | -0.031500 |
| C | -2.983846  | -0.928934 | -0.031875 |
| C | -4.293926  | -0.327290 | -0.030785 |
| H | -4.316483  | 0.762479  | -0.030029 |
| C | -5.490954  | -0.983528 | -0.030406 |
| H | -5.496182  | -2.069307 | -0.031312 |
| C | -6.747402  | -0.295469 | -0.028652 |
| H | -6.683906  | 0.792526  | -0.027488 |
| C | -8.007613  | -0.834093 | -0.028221 |
| C | -9.127282  | 0.081437  | -0.025931 |
| H | -8.897210  | 1.145622  | -0.027531 |
| C | -10.442766 | -0.243256 | -0.022031 |
| H | -10.753239 | -1.281214 | -0.026143 |
| C | -11.470640 | 0.821552  | -0.028254 |
| C | 8.285285   | 2.316760  | -0.030253 |
| H | 8.870829   | 2.600502  | -0.912650 |
| H | 7.375388   | 2.917524  | -0.028838 |
| H | 8.874674   | 2.602492  | 0.848929  |
| C | 2.880127   | 2.434789  | -0.033375 |
| H | 1.848327   | 2.785874  | -0.035432 |
| H | 3.374048   | 2.859395  | 0.848314  |
| H | 3.377018   | 2.858151  | -0.913977 |
| C | -2.880119  | -2.434808 | -0.032714 |
| H | -3.376079  | -2.858314 | -0.913778 |
| H | -1.848318  | -2.785895 | -0.033581 |
| H | -3.374973  | -2.859269 | 0.848515  |
| C | -8.285272  | -2.316795 | -0.030163 |
| H | -8.871764  | -2.600494 | -0.911937 |
| H | -7.375370  | -2.917554 | -0.029786 |

|   |            |           |           |
|---|------------|-----------|-----------|
| H | -8.873713  | -2.602576 | 0.849646  |
| C | 11.470644  | -0.821601 | -0.028038 |
| O | -11.148593 | 2.011326  | -0.075201 |
| C | -12.918779 | 0.443858  | 0.014425  |
| C | -13.862296 | 1.474569  | -0.103901 |
| C | -13.396242 | -0.870411 | 0.174640  |
| C | -15.229774 | 1.223099  | -0.073473 |
| H | -13.490701 | 2.486796  | -0.221186 |
| C | -14.756415 | -1.138893 | 0.211122  |
| H | -12.707930 | -1.700992 | 0.284467  |
| C | -15.685049 | -0.094298 | 0.084780  |
| H | -15.927139 | 2.046433  | -0.171637 |
| H | -15.129353 | -2.149667 | 0.338143  |
| O | 11.148606  | -2.011379 | -0.074913 |
| C | 12.918776  | -0.443884 | 0.014589  |
| C | 13.862316  | -1.474504 | -0.104349 |
| C | 13.396203  | 0.870326  | 0.175386  |
| C | 15.229787  | -1.222988 | -0.074004 |
| H | 13.490748  | -2.486693 | -0.222044 |
| C | 14.756371  | 1.138846  | 0.211821  |
| H | 12.707860  | 1.700807  | 0.285778  |
| C | 15.685029  | 0.094352  | 0.084823  |
| H | 15.927174  | -2.046243 | -0.172672 |
| H | 15.129286  | 2.149569  | 0.339312  |
| O | 16.994592  | 0.460754  | 0.129463  |
| O | -16.994620 | -0.460666 | 0.129436  |
| C | -17.985491 | 0.551141  | 0.010717  |
| H | -17.916256 | 1.072879  | -0.951717 |
| H | -18.945993 | 0.038240  | 0.073372  |
| H | -17.913179 | 1.284133  | 0.823575  |
| C | 17.985487  | -0.550956 | 0.010122  |
| H | 17.916141  | -1.072234 | -0.952553 |
| H | 18.945977  | -0.038046 | 0.072890  |
| H | 17.913316  | -1.284341 | 0.822637  |

Compound **2i**

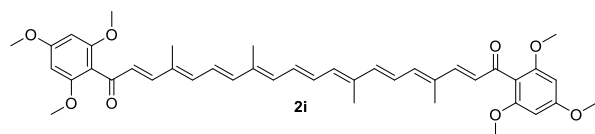

| Symbol | X         | Y         | Z         |
|--------|-----------|-----------|-----------|
| C      | 0.513693  | -0.452027 | -0.126553 |
| C      | -0.513689 | 0.452028  | -0.126622 |

|   |            |           |           |
|---|------------|-----------|-----------|
| C | 1.891665   | -0.078151 | -0.126705 |
| C | -1.891660  | 0.078151  | -0.126559 |
| H | -0.257436  | 1.509333  | -0.126676 |
| H | 0.257440   | -1.509332 | -0.126296 |
| C | 2.993886   | -0.898592 | -0.125704 |
| H | 2.083765   | 0.994992  | -0.127644 |
| C | -2.993879  | 0.898593  | -0.125694 |
| H | -2.083761  | -0.994992 | -0.127216 |
| C | 2.904239   | -2.405515 | -0.123930 |
| C | 4.298937   | -0.285494 | -0.126220 |
| C | -2.904224  | 2.405517  | -0.124312 |
| C | -4.298932  | 0.285498  | -0.126043 |
| H | 1.875704   | -2.766210 | -0.124562 |
| H | 3.402884   | -2.823890 | 0.758144  |
| H | 3.404704   | -2.826070 | -1.003929 |
| C | 5.501600   | -0.930929 | -0.124563 |
| H | 4.311726   | 0.804486  | -0.128016 |
| H | -3.403488  | 2.824146  | 0.757285  |
| H | -3.404064  | 2.825824  | -1.004789 |
| H | -1.875686  | 2.766204  | -0.124300 |
| C | -5.501595  | 0.930932  | -0.124627 |
| H | -4.311722  | -0.804482 | -0.127525 |
| C | 6.753997   | -0.234422 | -0.125110 |
| H | 5.515311   | -2.016757 | -0.122393 |
| C | -6.753992  | 0.234423  | -0.124991 |
| H | -5.515308  | 2.016760  | -0.122819 |
| C | 8.017139   | -0.764816 | -0.123302 |
| H | 6.683399   | 0.853198  | -0.127368 |
| C | -8.017139  | 0.764811  | -0.123412 |
| H | -6.683389  | -0.853197 | -0.126880 |
| C | 8.303528   | -2.245912 | -0.119721 |
| C | 9.135200   | 0.154539  | -0.125065 |
| C | -8.303543  | 2.245905  | -0.120341 |
| C | -9.135191  | -0.154554 | -0.124927 |
| H | 8.887143   | -2.525388 | 0.765228  |
| H | 7.397448   | -2.852584 | -0.126327 |
| H | 8.901300   | -2.526185 | -0.994779 |
| C | 10.449694  | -0.169073 | -0.121297 |
| H | 8.901509   | 1.218052  | -0.128587 |
| H | -8.901186  | 2.525895  | -0.995583 |
| H | -7.397469  | 2.852584  | -0.127041 |
| H | -8.887294  | 2.525654  | 0.764427  |
| C | -10.449687 | 0.169052  | -0.121388 |
| H | -8.901490  | -1.218066 | -0.128054 |
| C | 11.484456  | 0.891064  | -0.093001 |
| H | 10.784686  | -1.199820 | -0.124295 |

|   |            |           |           |
|---|------------|-----------|-----------|
| C | -11.484442 | -0.891084 | -0.092779 |
| H | -10.784685 | 1.199795  | -0.124778 |
| C | 12.924986  | 0.452544  | -0.017112 |
| O | 11.190597  | 2.082298  | -0.087560 |
| C | -12.924977 | -0.452553 | -0.017015 |
| O | -11.190578 | -2.082315 | -0.087055 |
| C | 13.472706  | -0.464971 | -0.939393 |
| C | 13.789310  | 0.991249  | 0.956576  |
| C | -13.789269 | -0.990924 | 0.956887  |
| C | -13.472739 | 0.464623  | -0.939607 |
| C | 14.816720  | -0.833136 | -0.900200 |
| O | 12.604859  | -0.937875 | -1.882510 |
| C | 15.143277  | 0.626641  | 1.019924  |
| O | 13.222944  | 1.842662  | 1.851483  |
| C | -15.143240 | -0.626315 | 1.020140  |
| O | -13.222870 | -1.841999 | 1.852092  |
| C | -14.816757 | 0.832776  | -0.900516 |
| O | -12.604936 | 0.937186  | -1.882938 |
| C | 15.643333  | -0.281333 | 0.083871  |
| H | 15.253935  | -1.521831 | -1.609637 |
| C | 13.090992  | -1.833815 | -2.870242 |
| H | 15.783998  | 1.039261  | 1.784084  |
| C | 14.033099  | 2.437146  | 2.850118  |
| C | -15.643337 | 0.281314  | 0.083774  |
| H | -15.783931 | -1.038676 | 1.784467  |
| C | -14.033013 | -2.436164 | 2.850926  |
| H | -15.254000 | 1.521204  | -1.610197 |
| C | -13.091142 | 1.832734  | -2.870990 |
| O | 16.941574  | -0.699087 | 0.047326  |
| H | 13.473677  | -2.760689 | -2.425061 |
| H | 13.880695  | -1.373662 | -3.476447 |
| H | 12.236733  | -2.065620 | -3.507765 |
| H | 14.466783  | 1.687487  | 3.525064  |
| H | 13.369723  | 3.089647  | 3.419131  |
| H | 14.840225  | 3.038545  | 2.413097  |
| O | -16.941588 | 0.699028  | 0.047106  |
| H | -14.840132 | -3.037717 | 2.414107  |
| H | -14.466704 | -1.686288 | 3.525627  |
| H | -13.369626 | -3.088468 | 3.420152  |
| H | -13.880863 | 1.372328  | -3.476979 |
| H | -13.473829 | 2.759768  | -2.426144 |
| H | -12.236921 | 2.064316  | -3.508643 |
| C | 17.851301  | -0.172657 | 1.000723  |
| C | -17.851289 | 0.172932  | 1.000712  |
| H | 17.941889  | 0.917460  | 0.915001  |
| H | 17.557429  | -0.429621 | 2.026343  |



|   |            |           |          |
|---|------------|-----------|----------|
| H | 18.816173  | -0.631166 | 0.779658 |
| H | -17.941865 | -0.917217 | 0.915390 |
| H | -17.557398 | 0.430273  | 2.026233 |
| H | -18.816172 | 0.631348  | 0.779502 |

Compound **2j**

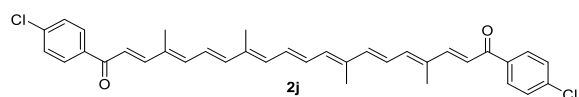

| Symbol | X          | Y         | Z         |
|--------|------------|-----------|-----------|
| C      | 10.440533  | 0.146387  | -0.045019 |
| H      | 10.765539  | 1.179954  | -0.051831 |
| C      | 9.119965   | -0.162622 | -0.048056 |
| H      | 8.876768   | -1.223884 | -0.051620 |
| C      | 8.012458   | 0.765349  | -0.047511 |
| C      | 6.746286   | 0.239174  | -0.046411 |
| H      | 6.671757   | -0.848094 | -0.045722 |
| C      | 5.497525   | 0.939700  | -0.046587 |
| H      | 5.512865   | 2.025290  | -0.047325 |
| C      | 4.294683   | 0.293487  | -0.046144 |
| H      | 4.308065   | -0.796389 | -0.045699 |
| C      | 2.990222   | 0.906376  | -0.046321 |
| C      | 1.890322   | 0.082278  | -0.046023 |
| H      | 2.084765   | -0.990303 | -0.045768 |
| C      | 0.512174   | 0.453826  | -0.046081 |
| H      | 0.253566   | 1.510392  | -0.046178 |
| C      | -0.512166  | -0.453895 | -0.046069 |
| H      | -0.253558  | -1.510461 | -0.046057 |
| C      | -1.890315  | -0.082346 | -0.046107 |
| H      | -2.084754  | 0.990235  | -0.045944 |
| C      | -2.990217  | -0.906441 | -0.046375 |
| C      | -4.294675  | -0.293548 | -0.046246 |
| H      | -4.308054  | 0.796328  | -0.045917 |
| C      | -5.497518  | -0.939758 | -0.046567 |
| H      | -5.512861  | -2.025347 | -0.047163 |
| C      | -6.746278  | -0.239228 | -0.046428 |
| H      | -6.671745  | 0.848040  | -0.045880 |
| C      | -8.012452  | -0.765398 | -0.047407 |
| C      | -9.119954  | 0.162578  | -0.048035 |
| H      | -8.876754  | 1.223838  | -0.051730 |
| C      | -10.440524 | -0.146425 | -0.044931 |
| H      | -10.765524 | -1.179994 | -0.051604 |
| C      | -11.452348 | 0.928228  | -0.062021 |
| C      | 8.306277   | 2.244851  | -0.049335 |

|    |            |           |           |
|----|------------|-----------|-----------|
| H  | 8.890779   | 2.523527  | -0.934008 |
| H  | 7.402832   | 2.855129  | -0.043471 |
| H  | 8.901813   | 2.523639  | 0.827917  |
| C  | 2.898656   | 2.412917  | -0.046893 |
| H  | 1.869781   | 2.772353  | -0.046799 |
| H  | 3.397491   | 2.833175  | 0.834046  |
| H  | 3.397060   | 2.832450  | -0.928420 |
| C  | -2.898661  | -2.412983 | -0.046797 |
| H  | -3.397531  | -2.832622 | -0.928006 |
| H  | -1.869790  | -2.772429 | -0.047211 |
| H  | -3.397041  | -2.833126 | 0.834459  |
| C  | -8.306278  | -2.244899 | -0.049031 |
| H  | -8.890728  | -2.523703 | -0.933699 |
| H  | -7.402837  | -2.855181 | -0.043020 |
| H  | -8.901868  | -2.523553 | 0.828226  |
| C  | 11.452365  | -0.928261 | -0.062027 |
| O  | -11.128940 | 2.114369  | -0.140972 |
| C  | -12.910869 | 0.565671  | 0.002824  |
| C  | -13.842253 | 1.588108  | -0.238107 |
| C  | -13.388266 | -0.717874 | 0.305985  |
| C  | -15.209401 | 1.342432  | -0.193711 |
| H  | -13.462933 | 2.579549  | -0.459814 |
| C  | -14.756128 | -0.979894 | 0.362257  |
| H  | -12.701451 | -1.528536 | 0.521875  |
| C  | -15.655368 | 0.053856  | 0.106690  |
| H  | -15.925168 | 2.133664  | -0.386663 |
| H  | -15.122045 | -1.971560 | 0.603050  |
| O  | 11.128980  | -2.114410 | -0.140937 |
| C  | 12.910874  | -0.565668 | 0.002831  |
| C  | 13.842294  | -1.588014 | -0.238341 |
| C  | 13.388219  | 0.717833  | 0.306261  |
| C  | 15.209433  | -1.342283 | -0.193937 |
| H  | 13.463015  | -2.579428 | -0.460237 |
| C  | 14.756070  | 0.979902  | 0.362557  |
| H  | 12.701363  | 1.528405  | 0.522364  |
| C  | 15.655350  | -0.053751 | 0.106732  |
| H  | 15.925231  | -2.133439 | -0.387083 |
| H  | 15.121951  | 1.971528  | 0.603567  |
| Cl | -17.380860 | -0.270337 | 0.167881  |
| Cl | 17.380829  | 0.270506  | 0.167939  |

---

### 3. LUMO coefficient of 2b.

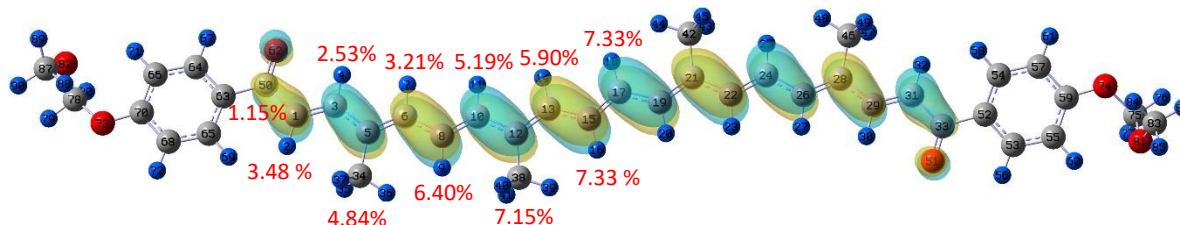

DFT calculation was performed with the Gaussian 16 program. The geometry optimization of compound **2b** was carried out at the B3LYP/6–31g(d,p) levels of theory. Calculation of the molecular orbital coefficient of the frontier orbitals was carried out by Multiwfn program (Lu, T.; Chen, F. Multiwfn: A Multifunctional Wavefunction Analyzer. *J. Comput. Chem.* **2012**, *33*, 580–592).

| Atom   | Coefficient | Atom   | Coefficient | Atom   | Coefficient |
|--------|-------------|--------|-------------|--------|-------------|
| 1 (C)  | 3.47706 %   | 31 (C) | 3.47702 %   | 61 (H) | -0.00000 %  |
| 2 (H)  | -0.00001 %  | 32 (H) | -0.00001 %  | 62 (O) | 1.43182 %   |
| 3 (C)  | 2.52878 %   | 33 (C) | 1.15381 %   | 63 (C) | 0.02918 %   |
| 4 (H)  | 0.00004 %   | 34 (C) | -0.01162 %  | 64 (C) | 0.31557 %   |
| 5 (C)  | 4.83798 %   | 35 (H) | 0.12933 %   | 65(C)  | 0.15607 %   |
| 6 (C)  | 3.20956 %   | 36 (H) | 0.00001 %   | 66 (C) | 0.00406 %   |
| 7 (H)  | 0.00000 %   | 37 (H) | 0.12968 %   | 67 (H) | 0.00020 %   |
| 8 (C)  | 6.39990 %   | 38 (C) | -0.02036 %  | 68 (C) | 0.01512 %   |
| 9 (H)  | 0.00000 %   | 39 (H) | 0.00000 %   | 69 (H) | 0.00358 %   |
| 10 (C) | 5.18468 %   | 40 (H) | 0.18073 %   | 70 (C) | 0.24118 %   |
| 11 (H) | 0.00000 %   | 41 (H) | 0.18124 %   | 71 (H) | 0.00004 %   |
| 12 (C) | 7.15036 %   | 42 (C) | -0.02036 %  | 72 (H) | -0.00000 %  |
| 13 (C) | 5.90123 %   | 43 (H) | 0.18116 %   | 73 (O) | 0.02813 %   |
| 14 (H) | 0.00000 %   | 44 (H) | 0.00000 %   | 74 (O) | 0.02813 %   |
| 15 (C) | 7.33370 %   | 45 (H) | 0.18080 %   | 75 (C) | 0.00182 %   |
| 16 (H) | 0.00000 %   | 46 (C) | -0.01162 %  | 76 (H) | 0.00054 %   |
| 17 (C) | 7.33373 %   | 47 (H) | 0.12944 %   | 77 (H) | 0.00533 %   |
| 18 (H) | 0.00000 %   | 48 (H) | 0.00001 %   | 78 (C) | 0.00182 %   |
| 19 (C) | 5.90118 %   | 49 (H) | 0.12957 %   | 79 (H) | 0.00054 %   |
| 20 (H) | 0.00000 %   | 50 (C) | 1.15384 %   | 80 (H) | 0.00533 %   |
| 21 (C) | 7.15035 %   | 51 (O) | 1.43180 %   | 81 (O) | 0.00122 %   |
| 22 (C) | 5.18462 %   | 52 (C) | 0.02918 %   | 82 (O) | 0.00122 %   |
| 23 (H) | 0.00000 %   | 53 (C) | 0.31556 %   | 83 (C) | 0.00013 %   |
| 24 (C) | 6.39986 %   | 54 (C) | 0.15607 %   | 84 (H) | 0.00001 %   |
| 25 (H) | 0.00000 %   | 55 (C) | 0.00406 %   | 85 (H) | 0.00006 %   |
| 26 (C) | 3.20952 %   | 56 (H) | 0.00020 %   | 86 (H) | 0.00001 %   |
| 27 (H) | 0.00000 %   | 57 (C) | 0.01512 %   | 87 (C) | 0.00013 %   |
| 28 (C) | 4.83792 %   | 58 (H) | 0.00359 %   | 88 (H) | 0.00001 %   |
| 29 (C) | 2.52874 %   | 59 (C) | 0.24117 %   | 89 (H) | 0.00006 %   |
| 30 (H) | 0.00004 %   | 60 (H) | 0.00004 %   | 90 (H) | 0.00001 %   |

**4. Table S1.** Antioxidant activity by DPPH, ABTS and superoxide radical scavenging assays

| Compound          | DPPH   |         | ABTS   |        | O <sub>2</sub> <sup>-•</sup> (superoxide radical) |         |
|-------------------|--------|---------|--------|--------|---------------------------------------------------|---------|
|                   | Mean   | Stdev.  | Mean   | Stdev. | Mean                                              | Stdev.  |
| $\beta$ -carotene | 0.6167 | 0.01528 | 0.9459 | 0.0263 | 0.3199                                            | 0.0128  |
| <b>1</b>          | 0.2352 | 0.01172 | 0.1245 | 0.0067 | 0.3572                                            | 0.01106 |
| <b>2</b>          | 0.4779 | 0.01474 | 0.5332 | 0.0077 | 0.4561                                            | 0.02266 |
| <b>3</b>          | 0.5596 | 0.01249 | 0.8661 | 0.0306 | 0.6353                                            | 0.01373 |
| <b>1a-al</b>      | 0.1030 | 0.00636 | 0.0868 | 0.0061 | 0.3130                                            | 0.01674 |
| <b>2a-al</b>      | 0.1516 | 0.01031 | 0.1416 | 0.0072 | 0.4234                                            | 0.0163  |
| <b>1a</b>         | 0.0689 | 0.00476 | 0.2333 | 0.0158 | 0.2019                                            | 0.01176 |
| <b>2a</b>         | 0.3178 | 0.00609 | 0.2565 | 0.0169 | 0.4075                                            | 0.01608 |
| <b>3a</b>         | 0.4117 | 0.01438 | 0.5884 | 0.0242 | 0.4683                                            | 0.01168 |
| <b>2b</b>         | 0.4855 | 0.02317 | 0.1537 | 0.014  | 0.4122                                            | 0.01255 |
| <b>3b</b>         | 0.5564 | 0.01378 | 0.7838 | 0.0309 | 0.5814                                            | 0.01575 |
| <b>2c</b>         | 0.6490 | 0.01462 | 0.9094 | 0.0239 | 0.4403                                            | 0.01764 |
| <b>2d</b>         | 0.5463 | 0.01488 | 0.5960 | 0.0197 | 0.4843                                            | 0.01179 |
| <b>2e</b>         | 0.5596 | 0.01887 | 0.7243 | 0.0205 | 0.4384                                            | 0.01635 |
| <b>2f</b>         | 0.5702 | 0.02054 | 0.3459 | 0.0269 | 0.4121                                            | 0.02737 |
| <b>2g</b>         | 0.5068 | 0.01252 | 0.2991 | 0.0145 | 0.3556                                            | 0.0088  |
| <b>2h</b>         | 0.5252 | 0.01273 | 0.3096 | 0.0096 | 0.3589                                            | 0.01409 |
| <b>2i</b>         | 0.9539 | 0.01155 | 0.6592 | 0.0271 | 0.3353                                            | 0.01943 |
| <b>2j</b>         | 0.2327 | 0.00685 | 0.3268 | 0.0130 | 0.4287                                            | 0.01075 |
| canthaxanthin     | 0.4179 | 0.01158 | 0.6465 | 0.0278 | 0.2907                                            | 0.01073 |
